# Supplementary material for: Utilizing E-nose for detection of mealybug infestation and ripeness of durian
Source: PeerJ. 2025 Aug 25;13:e19936. doi: 10.7717/peerj.19936 (PMC12393072; doi:10.7717/peerj.19936)
Supplement: Supplemental Information 1 — Dataset includes durians with and without mealybug infestation, covering morphological measurements (size, volume, and density), peel and pulp color (RGB values), weight and content (total weight, pulp weight, and pulp-to-total weight ratio), and nutritional composition (moisture, ash, fiber, fat, protein, carbohydrates, and sugar). Additionally, it includes electronic nose (E-Nose) sensor readings capturing volatile compounds using various gas sensors (MQ and GM series). The dataset enables comparative analysis of fruit quality, size, color, and volatile profiles between healthy and infested durians, offering valuable insights for agricultural research, food quality assessment, and pest management strategies. [file peerj-13-19936-s001.xlsx]

## Sheet: combined_data
		Morphological measurement			Peel color			Pulp color			Weight/content measurement						Nutrition							E-Nose readings
Fruit	Treatment	Max. Length	Max. Width	Circumference	Peel_R	Peel_G	Peel_B	Fruit_R	Fruit_G	Fruit_B	Total Weight	Pulp Weight	Pulp Number	Volume	Density	Pulp Weight/Total Weight	Moisture (%)	Ash (%)	Fiber (%)	Fat (%)	Protein (%)	Carbohydrates (%)	Total sugar (%)	MQ2	MQ3	MQ4	MQ5	MQ6	MQ7	MQ8	MQ9	MQ135	GM102B	GM302B	GM502B	GM702B
Durian_1	Without mealybug	27	19	60	63	65	56.6667	234.067	198.467	130	3.4	1175.5	4	7651.4	0.000444363	0.345735	59.3459	3.87675	3.33308	6.95732	5.5	20.9869	36.1538	-4.19e-06	-7.54e-05	-4.75e-05	-0.000145622	-1.04e-05	0.000582624	-9.47e-06	-1.94e-05	-6.55e-05	-1.47e-05	-5.66e-06	-3.13e-05	0.000150911
Durian_2	Without mealybug	28	20.5	62	54.3333	55.6667	54	233.8	161.667	77.6667	3.1	1131.8	5	9237.09	0.000335603	0.365097	60.868	4.26822	6.12909	9.06929	6.9	12.7654	48.2933	3.04e-05	6.53e-05	4.88e-05	0.000135327	3.44e-05	6.83e-05	3.39e-05	4.41e-05	4.35e-05	-1.65e-05	0	-5.02e-06	5.4e-05
Durian_3	Without mealybug	25.7	19.7	60.5	59.6667	58.3333	51	240.333	163.167	115.333	3.1	662.1	5	7829.52	0.000395937	0.213581	45.1555	3.81202	5.83112	8.80315	6.66	29.7382	44.8077	7.47e-05	6.45e-05	4.87e-05	4.46e-05	5.05e-05	8.02e-05	4.44e-05	3.55e-05	7.87e-05	6.47e-05	2.18e-05	2.38e-05	1.79e-05
Durian_4	Without mealybug	19.9	26.4	65.5	65	59.6667	51.6667	243	203.667	139	3.5	1033.3	4	10887.6	0.000321468	0.295229	59.2659	4.27567	5.3618	7.81922	6.45	16.8274	44.8077	-0.00015076	0.000233023	-0.000165242	0.000105122	5.44e-05	3.04e-05	3.51e-05	3.73e-05	4.09e-05	-0.000176994	-0.000354532	-0.000455909	-0.00515846
Durian_5	Without mealybug	26.9	20.4	58.5	54	55.3333	51.3333	237.033	204.333	121.333	3	919.7	4	8787.84	0.000341381	0.306567	61.5016	4.12659	5.5825	7.36008	6.05	15.3792	42.7644	4.45e-05	-1.97e-05	5.2e-05	-2.43e-05	-7.73e-07	-1.91e-06	-4.83e-06	4.62e-06	8.41e-06	0.000101795	7.47e-05	3.43e-05	-1.77e-05
Durian_6	With mealybug	28.7	19.1	69	57.3333	60.3333	52	240.067	176.667	118	4	1363.2	4	8218.99	0.000486678	0.3408	57.8895	3.68901	3.40067	8.0216	5.58	21.4192	41.5625	-3.03e-05	-4.93e-05	-3.52e-05	-1.29e-05	-9.16e-06	-3.19e-05	-2.92e-05	-1.52e-05	-2.25e-05	5.3e-05	3.63e-05	3.98e-06	-3.43e-05
Durian_7	With mealybug	24.6	16.9	48	60.3333	60	51.3333	213.667	183	109.667	2	510.7	5	5515.41	0.00036262	0.25535	63.8041	4.15894	8.5534	9.95138	7.01	6.52222	57.6683	8.91e-06	-8.73e-05	3.68e-06	-0.000119726	-5.07e-05	-7.03e-05	-4.34e-05	-2.93e-05	-5.32e-05	1.63e-05	0.000102079	0.000111691	0.000360468
Durian_8	With mealybug	24.4	19.1	58.5	55.6667	54.3333	50	234.333	200.667	116	2.7	1170.8	5	6987.57	0.0003864	0.43363	60.7353	3.76994	5.22727	8.91594	7	14.3515	48.2933	4.85e-06	-1.24e-05	-1.44e-05	-6.58e-06	-1.11e-05	4.9e-06	1.02e-05	-1.14e-05	-7.46e-06	5.54e-05	7.48e-05	3.49e-05	0.000183863
Durian_9	With mealybug	22.6	18.1	53.5	57.3333	53.6667	47.3333	222.5	195.667	115.333	2	601.4	5	5812.13	0.000344108	0.3007	64.3268	4.87184	8.86603	8.41924	6.43	7.08612	55.625	1.26e-05	-9.98e-06	4.65e-05	-6.61e-05	-2.59e-05	-8.53e-06	-2.11e-05	-6.61e-06	-8.45e-06	0.000117453	0.000140635	0.000135456	0.000504744
Durian_10	With mealybug	21	17.9	57.5	59	54.3333	51.3333	202.8	190.367	105.653	2.3	866.4	4	5281.96	0.000435445	0.376696	57.8448	3.83123	4.76918	7.80981	5.67	20.075	38.3173	-4.72e-05	-5.34e-05	-4.42e-05	-4.04e-05	-4.27e-06	-5.62e-05	-5.8e-05	-1.91e-05	-4.7e-05	-3.24e-05	-2.35e-06	7.26e-06	5.93e-05

## Sheet: table
Treatment	Durian_1	Durian_2	Durian_3	Durian_4	Durian_5	Durian_6	Durian_7	Durian_8	Durian_9	Durian_10			Without mealybug	With mealybug
Max. Length	27	28	25.7	19.9	26.9	28.7	24.6	24.4	22.6	21		Max. Length	25.5±3.235	24.26±2.8824
Max. Width	19	20.5	19.7	26.4	20.4	19.1	16.9	19.1	18.1	17.9		Max. Width	21.2±2.969	18.22±0.923
Circumference	60	62	60.5	65.5	58.5	69	48	58.5	53.5	57.5		Circumference	61.3±2.6599	57.3±7.7347
Peel_R	63	54.3333	59.6667	65	54	57.3333	60.3333	55.6667	57.3333	59		Peel_R	59.2±4.9755	57.9333±1.7857
Peel_G	65	55.6667	58.3333	59.6667	55.3333	60.3333	60	54.3333	53.6667	54.3333		Peel_G	58.8±3.9129	56.5333±3.33
Peel_B	56.6667	54	51	51.6667	51.3333	52	51.3333	50	47.3333	51.3333		Peel_B	52.9333±2.3968	50.4±1.8619
Fruit_R	234.067	233.8	240.333	243	237.033	240.067	213.667	234.333	222.5	202.8		Fruit_R	237.6467±3.9958	222.6733±15.121
Fruit_G	198.467	161.667	163.167	203.667	204.333	176.667	183	200.667	195.667	190.367		Fruit_G	186.26±21.8905	189.2733±9.6198
Fruit_B	130	77.6667	115.333	139	121.333	118	109.667	116	115.333	105.653		Fruit_B	116.6667±23.5643	112.9307±5.1114
Total Weight	3.4	3.1	3.1	3.5	3	4	2	2.7	2	2.3		Total Weight	3.22±0.2168	2.6±0.8337
Pulp Weight	1175.5	1131.8	662.1	1033.3	919.7	1363.2	510.7	1170.8	601.4	866.4		Pulp Weight	984.48±205.3658	902.5±363.9028
Pulp Number	4	5	5	4	4	4	5	5	5	4		Pulp Number	4.4±0.5477	4.6±0.5477
Volume	7651.4	9237.09	7829.52	10887.6	8787.84	8218.99	5515.41	6987.57	5812.13	5281.96		Volume	8878.683±1301.8521	6363.212±1227.3228
Density	0.000444363	0.000335603	0.000395937	0.000321468	0.000341381	0.000486678	0.00036262	0.0003864	0.000344108	0.000435445		Density	0.0004±0.0001	0.0004±0.0001
Pulp Weight/Total Weight	0.345735	0.365097	0.213581	0.295229	0.306567	0.3408	0.25535	0.43363	0.3007	0.376696		Pulp Weight/Total Weight	0.3052±0.0586	0.3414±0.0686
Moisture (%)	59.3459	60.868	45.1555	59.2659	61.5016	57.8895	63.8041	60.7353	64.3268	57.8448		Moisture (%)	57.2274±6.8172	60.9201±3.1064
Ash (%)	3.87675	4.26822	3.81202	4.27567	4.12659	3.68901	4.15894	3.76994	4.87184	3.83123		Ash (%)	4.0718±0.2172	4.0642±0.4855
Fiber (%)	3.33308	6.12909	5.83112	5.3618	5.5825	3.40067	8.5534	5.22727	8.86603	4.76918		Fiber (%)	5.2475±1.1077	6.1633±2.4222
Fat (%)	6.95732	9.06929	8.80315	7.81922	7.36008	8.0216	9.95138	8.91594	8.41924	7.80981		Fat (%)	8.0018±0.9107	8.6236±0.8537
Protein (%)	5.5	6.9	6.66	6.45	6.05	5.58	7.01	7	6.43	5.67		Protein (%)	6.312±0.5509	6.338±0.6927
Carbohydrates (%)	20.9869	12.7654	29.7382	16.8274	15.3792	21.4192	6.52222	14.3515	7.08612	20.075		Carbohydrates (%)	19.1394±6.6306	13.8908±6.9952
Total sugar (%)	36.1538	48.2933	44.8077	44.8077	42.7644	41.5625	57.6683	48.2933	55.625	38.3173		Total sugar (%)	43.3654±4.4948	48.2933±8.4627
MQ2	-4.19e-06	3.04e-05	7.47e-05	-0.00015076	4.45e-05	-3.03e-05	8.91e-06	4.85e-06	1.26e-05	-4.72e-05		MQ2	-0.000001±0.000088	-0.00001±0.000027
MQ3	-7.54e-05	6.53e-05	6.45e-05	0.000233023	-1.97e-05	-4.93e-05	-8.73e-05	-1.24e-05	-9.98e-06	-5.34e-05		MQ3	0.000054±0.000117	-0.000042±0.000032
MQ4	-4.75e-05	4.88e-05	4.87e-05	-0.000165242	5.2e-05	-3.52e-05	3.68e-06	-1.44e-05	4.65e-05	-4.42e-05		MQ4	-0.000013±0.000095	-0.000009±0.000036
MQ5	-0.000145622	0.000135327	4.46e-05	0.000105122	-2.43e-05	-1.29e-05	-0.000119726	-6.58e-06	-6.61e-05	-4.04e-05		MQ5	0.000023±0.000112	-0.000049±0.000046
MQ6	-1.04e-05	3.44e-05	5.05e-05	5.44e-05	-7.73e-07	-9.16e-06	-5.07e-05	-1.11e-05	-2.59e-05	-4.27e-06		MQ6	0.000026±0.00003	-0.00002±0.000019
MQ7	0.000582624	6.83e-05	8.02e-05	3.04e-05	-1.91e-06	-3.19e-05	-7.03e-05	4.9e-06	-8.53e-06	-5.62e-05		MQ7	0.000152±0.000243	-0.000032±0.000031
MQ8	-9.47e-06	3.39e-05	4.44e-05	3.51e-05	-4.83e-06	-2.92e-05	-4.34e-05	1.02e-05	-2.11e-05	-5.8e-05		MQ8	0.00002±0.000025	-0.000028±0.000026
MQ9	-1.94e-05	4.41e-05	3.55e-05	3.73e-05	4.62e-06	-1.52e-05	-2.93e-05	-1.14e-05	-6.61e-06	-1.91e-05		MQ9	0.00002±0.000027	-0.000016±0.000009
MQ135	-6.55e-05	4.35e-05	7.87e-05	4.09e-05	8.41e-06	-2.25e-05	-5.32e-05	-7.46e-06	-8.45e-06	-4.7e-05		MQ135	0.000021±0.000054	-0.000028±0.000021
GM102B	-1.47e-05	-1.65e-05	6.47e-05	-0.000176994	0.000101795	5.3e-05	1.63e-05	5.54e-05	0.000117453	-3.24e-05		GM102B	-0.000008±0.000107	0.000042±0.000055
GM302B	-5.66e-06	0	2.18e-05	-0.000354532	7.47e-05	3.63e-05	0.000102079	7.48e-05	0.000140635	-2.35e-06		GM302B	-0.000053±0.000172	0.00007±0.000056
GM502B	-3.13e-05	-5.02e-06	2.38e-05	-0.000455909	3.43e-05	3.98e-06	0.000111691	3.49e-05	0.000135456	7.26e-06		GM502B	-0.000087±0.000208	0.000059±0.000061
GM702B	0.000150911	5.4e-05	1.79e-05	-0.00515846	-1.77e-05	-3.43e-05	0.000360468	0.000183863	0.000504744	5.93e-05		GM702B	-0.000991±0.002331	0.000215±0.000219
TRT	Without mealybug	Without mealybug	Without mealybug	Without mealybug	Without mealybug	With mealybug	With mealybug	With mealybug	With mealybug	With mealybug
