# Supplementary material for: Utilizing E-nose for detection of mealybug infestation and ripeness of durian
Source: PeerJ. 2025 Aug 25;13:e19936. doi: 10.7717/peerj.19936 (PMC12393072; doi:10.7717/peerj.19936)
Supplement: Supplemental Information 2 [file peerj-13-19936-s002.xlsx]

## Sheet: enose_readings_20250411
Color	GM102B_rel	GM302B_rel	GM502B_rel	GM702B_rel	temperature	humidity	treatment	timestamp	time	VOC sources
Gray	-33.158	-56.383	-58.3011	-45.288	38.16	46.11	Outdoor_Control_20250411_162538	1744363539	71	Outdoor air
Gray	-23.6965	-25.2994	-17.0703	-32.8167	42.43	37.89	Outdoor_Control_20250411_163539	1744364140	71	Outdoor air
Gray	-26.2297	-33.6646	-25.177	-41.5478	41.88	38.84	Outdoor_Control_20250411_164540	1744364741	71	Outdoor air
Gray	-33.7002	-58.5214	-61.4547	-45.8035	38.17	46.15	Outdoor_Control_20250411_162538	1744363539	72	Outdoor air
Gray	-24.7799	-28.6734	-19.4241	-34.3415	42.46	37.84	Outdoor_Control_20250411_163539	1744364140	72	Outdoor air
Gray	-26.3371	-31.8142	-23.3193	-40.8773	41.86	38.82	Outdoor_Control_20250411_164540	1744364741	72	Outdoor air
Gray	-32.5528	-57.672	-59.6177	-45.1585	38.14	46.18	Outdoor_Control_20250411_162538	1744363539	73	Outdoor air
Gray	-25.8119	-29.9111	-20.6657	-34.4016	42.46	37.85	Outdoor_Control_20250411_163539	1744364140	73	Outdoor air
Gray	-26.5606	-34.4782	-25.0104	-41.2981	41.86	38.89	Outdoor_Control_20250411_164540	1744364741	73	Outdoor air
Gray	-33.6806	-58.6228	-62.5841	-45.3989	38.14	46.22	Outdoor_Control_20250411_162538	1744363539	74	Outdoor air
Gray	-25.8438	-31.1488	-20.9073	-34.4617	42.46	37.86	Outdoor_Control_20250411_163539	1744364140	74	Outdoor air
Gray	-25.2536	-30.4402	-21.9655	-40.3525	41.83	38.87	Outdoor_Control_20250411_164540	1744364741	74	Outdoor air
Gray	-33.5528	-58.672	-61.6177	-45.1585	38.14	46.18	Outdoor_Control_20250411_162538	1744363539	75	Outdoor air
Gray	-25.4614	-31.199	-20.9616	-34.2467	42.45	37.87	Outdoor_Control_20250411_163539	1744364140	75	Outdoor air
Gray	-24.2979	-31.0171	-21.5781	-40.0681	41.8	38.96	Outdoor_Control_20250411_164540	1744364741	75	Outdoor air
Gray	-33.5209	-59.4343	-61.3761	-45.0983	38.14	46.17	Outdoor_Control_20250411_162538	1744363539	76	Outdoor air
Gray	-24.6645	-30.0617	-19.8287	-33.7566	42.43	37.88	Outdoor_Control_20250411_163539	1744364140	76	Outdoor air
Gray	-23.533	-29.1175	-19.6867	-39.638	41.78	38.98	Outdoor_Control_20250411_164540	1744364741	76	Outdoor air
Gray	-34.3816	-63.047	-64.9922	-46.7087	38.16	46.18	Outdoor_Control_20250411_162538	1744363539	77	Outdoor air
Gray	-24.7603	-31.7749	-20.5535	-33.9369	42.43	37.91	Outdoor_Control_20250411_163539	1744364140	77	Outdoor air
Gray	-23.6927	-31.3061	-20.8947	-39.9386	41.78	39.03	Outdoor_Control_20250411_164540	1744364741	77	Outdoor air
Gray	-33.1384	-59.4845	-61.4305	-45.8833	38.13	46.18	Outdoor_Control_20250411_162538	1744363539	78	Outdoor air
Gray	-24.2501	-29.8742	-19.6415	-33.4814	42.42	37.88	Outdoor_Control_20250411_163539	1744364140	78	Outdoor air
Gray	-23.2144	-29.6431	-21.2243	-40.5432	41.77	39.01	Outdoor_Control_20250411_164540	1744364741	78	Outdoor air
Gray	-33.5528	-61.672	-64.6177	-46.1585	38.14	46.18	Outdoor_Control_20250411_162538	1744363539	79	Outdoor air
Gray	-24.3779	-30.8251	-21.6078	-33.7219	42.42	37.92	Outdoor_Control_20250411_163539	1744364140	79	Outdoor air
Gray	-22.131	-28.2692	-18.8704	-40.0184	41.74	39.06	Outdoor_Control_20250411_164540	1744364741	79	Outdoor air
Gray	-34.3816	-65.047	-66.9922	-47.7087	38.16	46.18	Outdoor_Control_20250411_162538	1744363539	80	Outdoor air
Gray	-23.4214	-28.4992	-18.267	-32.9312	42.4	37.88	Outdoor_Control_20250411_163539	1744364140	80	Outdoor air
Gray	-21.398	-27.6073	-18.2207	-39.6484	41.72	39.09	Outdoor_Control_20250411_164540	1744364741	80	Outdoor air
Gray	-34.1384	-62.4845	-64.4305	-46.8833	38.13	46.18	Outdoor_Control_20250411_162538	1744363539	81	Outdoor air
Gray	-23.613	-31.9255	-20.7165	-33.2918	42.4	37.94	Outdoor_Control_20250411_163539	1744364140	81	Outdoor air
Gray	-20.4423	-27.1842	-16.8333	-39.364	41.69	39.18	Outdoor_Control_20250411_164540	1744364741	81	Outdoor air
Gray	-34.1065	-63.2468	-65.1889	-46.8232	38.13	46.17	Outdoor_Control_20250411_162538	1744363539	82	Outdoor air
Gray	-23.1667	-31.5002	-19.2877	-32.9566	42.39	37.93	Outdoor_Control_20250411_163539	1744364140	82	Outdoor air
Gray	-20.5701	-28.135	-18.7996	-39.6045	41.69	39.22	Outdoor_Control_20250411_164540	1744364741	82	Outdoor air
Gray	-34.7764	-67.336	-68.3089	-47.5792	38.14	46.25	Outdoor_Control_20250411_162538	1744363539	83	Outdoor air
Gray	-23.4222	-33.402	-22.2204	-33.4375	42.39	38.01	Outdoor_Control_20250411_163539	1744364140	83	Outdoor air
Gray	-20.7298	-31.3236	-20.0076	-39.905	41.69	39.27	Outdoor_Control_20250411_164540	1744364741	83	Outdoor air
Gray	-33.9796	-66.1987	-68.176	-48.0891	38.12	46.26	Outdoor_Control_20250411_162538	1744363539	84	Outdoor air
Gray	-22.5934	-31.0269	-20.8459	-32.8872	42.37	38.01	Outdoor_Control_20250411_163539	1744364140	84	Outdoor air
Gray	-19.0722	-26.5736	-15.2586	-38.8045	41.65	39.27	Outdoor_Control_20250411_164540	1744364741	84	Outdoor air
Gray	-34.7764	-68.336	-70.3089	-48.5792	38.14	46.25	Outdoor_Control_20250411_162538	1744363539	85	Outdoor air
Gray	-22.211	-30.0771	-19.9002	-32.6722	42.36	38.02	Outdoor_Control_20250411_163539	1744364140	85	Outdoor air
Gray	-19.1681	-27.2867	-16.9833	-38.9848	41.65	39.3	Outdoor_Control_20250411_164540	1744364741	85	Outdoor air
Gray	-34.023	-63.8728	-65.8351	-47.2984	38.1	46.22	Outdoor_Control_20250411_162538	1744363539	86	Outdoor air
Gray	-22.211	-32.0771	-19.9002	-32.6722	42.36	38.02	Outdoor_Control_20250411_163539	1744364140	86	Outdoor air
Gray	-19.1165	-26.1505	-15.8711	-38.5201	41.62	39.36	Outdoor_Control_20250411_164540	1744364741	86	Outdoor air
Gray	-33.9911	-64.6351	-65.5935	-47.2383	38.1	46.21	Outdoor_Control_20250411_162538	1744363539	87	Outdoor air
Gray	-21.9563	-32.0782	-20.9209	-31.6976	42.35	38.07	Outdoor_Control_20250411_163539	1744364140	87	Outdoor air
Gray	-18.0011	-24.5388	-14.2757	-37.9351	41.59	39.4	Outdoor_Control_20250411_164540	1744364741	87	Outdoor air
Gray	-33.417	-62.259	-65.1983	-46.6626	38.09	46.16	Outdoor_Control_20250411_162538	1744363539	88	Outdoor air
Gray	-21.6492	-29.0402	-17.876	-30.752	42.32	38.05	Outdoor_Control_20250411_163539	1744364140	88	Outdoor air
Gray	-17.2682	-23.8769	-12.626	-37.5652	41.57	39.43	Outdoor_Control_20250411_164540	1744364741	88	Outdoor air
Gray	-34.9911	-66.6351	-68.5935	-47.2383	38.1	46.21	Outdoor_Control_20250411_162538	1744363539	89	Outdoor air
Gray	-21.7131	-29.5157	-18.3592	-31.8722	42.32	38.07	Outdoor_Control_20250411_163539	1744364140	89	Outdoor air
Gray	-17.2682	-24.8769	-13.626	-37.5652	41.57	39.43	Outdoor_Control_20250411_164540	1744364741	89	Outdoor air
Gray	-34.4685	-67.3952	-68.3105	-48.1273	38.12	46.1	Outdoor_Control_20250411_162538	1744363539	90	Outdoor air
Gray	-21.7451	-30.7534	-18.6007	-31.9323	42.32	38.08	Outdoor_Control_20250411_163539	1744364140	90	Outdoor air
Gray	-16.0569	-22.5521	-10.3058	-36.7999	41.54	39.44	Outdoor_Control_20250411_164540	1744364741	90	Outdoor air
Gray	-34.6397	-66.0202	-65.936	-47.577	38.1	46.1	Outdoor_Control_20250411_162538	1744363539	91	Outdoor air
Gray	-22.2233	-33.4163	-21.2712	-32.3276	42.33	38.1	Outdoor_Control_20250411_163539	1744364140	91	Outdoor air
Gray	-15.8342	-22.7909	-11.5681	-37.8854	41.53	39.5	Outdoor_Control_20250411_164540	1744364741	91	Outdoor air
Gray	-34.0656	-64.6441	-65.5408	-47.0014	38.09	46.05	Outdoor_Control_20250411_162538	1744363539	92	Outdoor air
Gray	-22.2233	-34.4163	-22.2712	-32.3276	42.33	38.1	Outdoor_Control_20250411_163539	1744364140	92	Outdoor air
Gray	-14.5272	-19.7529	-7.52317	-36.9398	41.5	39.48	Outdoor_Control_20250411_164540	1744364741	92	Outdoor air
Gray	-34.6078	-67.7825	-67.6944	-47.5169	38.1	46.09	Outdoor_Control_20250411_162538	1744363539	93	Outdoor air
Gray	-21.7131	-33.5157	-21.3592	-32.8722	42.32	38.07	Outdoor_Control_20250411_163539	1744364140	93	Outdoor air
Gray	-13.4437	-17.3789	-5.16937	-35.415	41.47	39.53	Outdoor_Control_20250411_164540	1744364741	93	Outdoor air
Gray	-34.1615	-67.3573	-67.2656	-47.1817	38.09	46.08	Outdoor_Control_20250411_162538	1744363539	94	Outdoor air
Gray	-20.5977	-30.904	-18.7638	-31.2872	42.29	38.11	Outdoor_Control_20250411_163539	1744364140	94	Outdoor air
Gray	-13.4437	-18.3789	-6.16937	-35.415	41.47	39.53	Outdoor_Control_20250411_164540	1744364741	94	Outdoor air
Gray	-32.9822	-65.2702	-65.187	-47.4765	38.06	46.1	Outdoor_Control_20250411_162538	1744363539	95	Outdoor air
Gray	-20.7574	-33.0926	-19.9717	-31.5878	42.29	38.16	Outdoor_Control_20250411_163539	1744364140	95	Outdoor air
Gray	-13.6992	-21.2806	-8.10209	-35.8958	41.47	39.61	Outdoor_Control_20250411_164540	1744364741	95	Outdoor air
Gray	-34.8314	-71.4465	-72.3855	-47.9377	38.1	46.16	Outdoor_Control_20250411_162538	1744363539	96	Outdoor air
Gray	-20.5986	-34.8068	-21.7172	-31.7935	42.28	38.24	Outdoor_Control_20250411_163539	1744364140	96	Outdoor air
Gray	-13.1571	-19.1423	-6.94847	-35.3803	41.46	39.57	Outdoor_Control_20250411_164540	1744364741	96	Outdoor air
Gray	-33.6521	-68.3594	-69.307	-47.2325	38.07	46.18	Outdoor_Control_20250411_162538	1744363539	97	Outdoor air
Gray	-20.3758	-36.0455	-21.9795	-31.879	42.27	38.3	Outdoor_Control_20250411_163539	1744364140	97	Outdoor air
Gray	-12.8189	-17.7694	-5.61536	-34.8808	41.42	39.67	Outdoor_Control_20250411_164540	1744364741	97	Outdoor air
Gray	-34.5767	-72.4476	-72.4062	-47.9631	38.09	46.21	Outdoor_Control_20250411_162538	1744363539	98	Outdoor air
Gray	-20.7263	-36.7576	-23.6835	-32.034	42.28	38.28	Outdoor_Control_20250411_163539	1744364140	98	Outdoor air
Gray	-10.5757	-15.2068	-2.05361	-34.0554	41.39	39.67	Outdoor_Control_20250411_164540	1744364741	98	Outdoor air
Gray	-33.6521	-70.3594	-71.307	-46.2325	38.07	46.18	Outdoor_Control_20250411_162538	1744363539	99	Outdoor air
Gray	-20.4716	-37.7587	-23.7042	-32.0594	42.27	38.33	Outdoor_Control_20250411_163539	1744364140	99	Outdoor air
Gray	-10.7355	-16.3954	-4.26156	-35.356	41.39	39.72	Outdoor_Control_20250411_164540	1744364741	99	Outdoor air
Gray	-34.6086	-73.6853	-74.6478	-46.0232	38.09	46.22	Outdoor_Control_20250411_162538	1744363539	100	Outdoor air
Gray	-21.918	-39.1839	-26.1331	-32.3946	42.28	38.34	Outdoor_Control_20250411_163539	1744364140	100	Outdoor air
Gray	-11.959	-19.0594	-5.95269	-35.7768	41.39	39.79	Outdoor_Control_20250411_164540	1744364741	100	Outdoor air
Blue	-27.2501	-50.1028	-40.8503	-47.5902	40.41	41.09	NoMB_Durian_1_20250411_165358	1744365238	71	Outdoor air, Durian
Blue	-40.8858	-81.4485	-72.7987	-68.7062	39.73	42.6	NoMB_Durian_1_20250411_170359	1744365839	71	Outdoor air, Durian
Blue	-52.6829	-117.834	-110.352	-56.2895	38.8	45.57	NoMB_Durian_1_20250411_171400	1744366440	71	Outdoor air, Durian
Blue	-67.0797	-261.154	-253.531	-90.8393	37.66	53.9	NoMB_Durian_2_20250411_175620	1744368981	71	Outdoor air, Durian
Blue	-64.8472	-245.125	-242.433	-66.6568	37.35	55.48	NoMB_Durian_2_20250411_180622	1744369582	71	Outdoor air, Durian
Blue	-63.053	-241.06	-236.311	-113.554	37	56.06	NoMB_Durian_2_20250411_181623	1744370184	71	Outdoor air, Durian
Blue	-52.93	-206.323	-203.135	-98.4125	35.58	58.01	NoMB_Durian_3_20250411_185747	1744372667	71	Outdoor air, Durian
Blue	-47.9561	-162.967	-158.004	-81.6656	35.55	55.59	NoMB_Durian_3_20250411_190748	1744373269	71	Outdoor air, Durian
Blue	-43.8786	-171.913	-167.325	-83.6848	35.41	56.54	NoMB_Durian_3_20250411_191750	1744373871	71	Outdoor air, Durian
Blue	-42.6567	-144.826	-140.332	-53.1678	34.54	56.26	NoMB_Durian_4_20250411_195701	1744376222	71	Outdoor air, Durian
Blue	-40.5098	-140.905	-137.726	-76.1989	34.98	54.61	NoMB_Durian_4_20250411_200704	1744376825	71	Outdoor air, Durian
Blue	-13.61	-104.859	-103.52	-39.6478	34.49	58.31	NoMB_Durian_4_20250411_201707	1744377427	71	Outdoor air, Durian
Blue	-31.1952	-101.105	-94.2515	-44.5651	34.57	52.9	NoMB_Durian_5_20250411_205711	1744379831	71	Outdoor air, Durian
Blue	-44.2288	-123.786	-116.249	-69.7693	34.91	52.53	NoMB_Durian_5_20250411_210714	1744380434	71	Outdoor air, Durian
Blue	-22.5649	-100.742	-91.1047	-46.2944	34.71	54.18	NoMB_Durian_5_20250411_211719	1744381040	71	Outdoor air, Durian
Blue	-24.7637	-43.9777	-34.7267	-46.9394	40.35	41.09	NoMB_Durian_1_20250411_165358	1744365238	72	Outdoor air, Durian
Blue	-41.0456	-84.6371	-75.0066	-70.0068	39.73	42.65	NoMB_Durian_1_20250411_170359	1744365839	72	Outdoor air, Durian
Blue	-52.6199	-120.261	-111.822	-56.6756	38.79	45.68	NoMB_Durian_1_20250411_171400	1744366440	72	Outdoor air, Durian
Blue	-65.2608	-252.41	-244.667	-90.4257	37.64	53.59	NoMB_Durian_2_20250411_175620	1744368981	72	Outdoor air, Durian
Blue	-64.1462	-244.701	-242.025	-70.347	37.33	55.52	NoMB_Durian_2_20250411_180622	1744369582	72	Outdoor air, Durian
Blue	-64.1053	-245.099	-240.377	-115.525	37.02	56.13	NoMB_Durian_2_20250411_181623	1744370184	72	Outdoor air, Durian
Blue	-51.7187	-202.998	-199.815	-97.6472	35.55	58.02	NoMB_Durian_3_20250411_185747	1744372667	72	Outdoor air, Durian
Blue	-49.1043	-168.72	-163.795	-83.8169	35.57	55.69	NoMB_Durian_3_20250411_190748	1744373269	72	Outdoor air, Durian
Blue	-42.3807	-168.351	-163.784	-82.8848	35.37	56.59	NoMB_Durian_3_20250411_191750	1744373871	72	Outdoor air, Durian
Blue	-41.6052	-142.69	-138.219	-51.7031	34.51	56.32	NoMB_Durian_4_20250411_195701	1744376222	72	Outdoor air, Durian
Blue	-39.2667	-137.343	-134.165	-75.3735	34.95	54.61	NoMB_Durian_4_20250411_200704	1744376825	72	Outdoor air, Durian
Blue	-13.9614	-107.473	-106.177	-40.309	34.49	58.42	NoMB_Durian_4_20250411_201707	1744377427	72	Outdoor air, Durian
Blue	-30.1118	-99.7315	-91.8977	-44.0403	34.54	52.95	NoMB_Durian_5_20250411_205711	1744379831	72	Outdoor air, Durian
Blue	-43.1773	-121.649	-114.137	-69.3045	34.88	52.59	NoMB_Durian_5_20250411_210714	1744380434	72	Outdoor air, Durian
Blue	-20.0982	-96.5155	-86.8518	-45.0483	34.68	54.11	NoMB_Durian_5_20250411_211719	1744381040	72	Outdoor air, Durian
Blue	-24.7957	-45.2154	-35.9683	-47.9995	40.35	41.1	NoMB_Durian_1_20250411_165358	1744365238	73	Outdoor air, Durian
Blue	-40.6116	-81.551	-71.9488	-69.327	39.69	42.72	NoMB_Durian_1_20250411_170359	1744365839	73	Outdoor air, Durian
Blue	-53.1097	-119.36	-110.91	-56.2201	38.78	45.65	NoMB_Durian_1_20250411_171400	1744366440	73	Outdoor air, Durian
Blue	-63.7612	-245.043	-237.219	-90.6131	37.62	53.38	NoMB_Durian_2_20250411_175620	1744368981	73	Outdoor air, Durian
Blue	-63.3174	-243.326	-239.651	-73.7967	37.31	55.52	NoMB_Durian_2_20250411_180622	1744369582	73	Outdoor air, Durian
Blue	-63.4043	-244.674	-239.969	-115.215	37	56.17	NoMB_Durian_2_20250411_181623	1744370184	73	Outdoor air, Durian
Blue	-51.6229	-202.285	-200.09	-97.4668	35.55	57.99	NoMB_Durian_3_20250411_185747	1744372667	73	Outdoor air, Durian
Blue	-48.4991	-168.009	-164.112	-83.6874	35.55	55.76	NoMB_Durian_3_20250411_190748	1744373269	73	Outdoor air, Durian
Blue	-42.2849	-167.638	-164.059	-82.7045	35.37	56.56	NoMB_Durian_3_20250411_191750	1744373871	73	Outdoor air, Durian
Blue	-42.5298	-145.778	-141.319	-49.4337	34.53	56.35	NoMB_Durian_4_20250411_195701	1744376222	73	Outdoor air, Durian
Blue	-39.0439	-138.582	-134.427	-75.459	34.94	54.67	NoMB_Durian_4_20250411_200704	1744376825	73	Outdoor air, Durian
Blue	-15.2489	-110.613	-108.352	-40.85	34.49	58.51	NoMB_Durian_4_20250411_201707	1744377427	73	Outdoor air, Durian
Blue	-29.921	-100.208	-92.4016	-44.1859	34.53	53.02	NoMB_Durian_5_20250411_205711	1744379831	73	Outdoor air, Durian
Blue	-43.4009	-124.313	-115.828	-69.7253	34.88	52.66	NoMB_Durian_5_20250411_210714	1744380434	73	Outdoor air, Durian
Blue	-19.8231	-92.7153	-83.0485	-44.1627	34.65	54.1	NoMB_Durian_5_20250411_211719	1744381040	73	Outdoor air, Durian
Blue	-24.6688	-47.1674	-36.9554	-48.2654	40.34	41.19	NoMB_Durian_1_20250411_165358	1744365238	74	Outdoor air, Durian
Blue	-40.8032	-82.9773	-74.3983	-69.6877	39.69	42.78	NoMB_Durian_1_20250411_170359	1744365839	74	Outdoor air, Durian
Blue	-52.5684	-119.125	-110.71	-56.2108	38.76	45.74	NoMB_Durian_1_20250411_171400	1744366440	74	Outdoor air, Durian
Blue	-63.645	-241.529	-232.67	-89.5218	37.6	53.29	NoMB_Durian_2_20250411_175620	1744368981	74	Outdoor air, Durian
Blue	-63.6164	-242.902	-239.242	-76.4869	37.29	55.56	NoMB_Durian_2_20250411_180622	1744369582	74	Outdoor air, Durian
Blue	-62.7991	-244.963	-239.286	-115.086	36.98	56.24	NoMB_Durian_2_20250411_181623	1744370184	74	Outdoor air, Durian
Blue	-50.5386	-199.008	-195.783	-96.4357	35.53	57.91	NoMB_Durian_3_20250411_185747	1744372667	74	Outdoor air, Durian
Blue	-48.0536	-169.486	-164.636	-84.8585	35.53	55.88	NoMB_Durian_3_20250411_190748	1744373269	74	Outdoor air, Durian
Blue	-41.0417	-166.076	-160.497	-81.8791	35.34	56.56	NoMB_Durian_3_20250411_191750	1744373871	74	Outdoor air, Durian
Blue	-41.5422	-144.117	-139.69	-44.0892	34.5	56.43	NoMB_Durian_4_20250411_195701	1744376222	74	Outdoor air, Durian
Blue	-38.4707	-138.108	-133.985	-75.3896	34.92	54.75	NoMB_Durian_4_20250411_200704	1744376825	74	Outdoor air, Durian
Blue	-14.6756	-110.14	-107.91	-40.7806	34.47	58.59	NoMB_Durian_4_20250411_201707	1744377427	74	Outdoor air, Durian
Blue	-30.0487	-101.159	-93.3679	-44.4263	34.53	53.06	NoMB_Durian_5_20250411_205711	1744379831	74	Outdoor air, Durian
Blue	-43.9226	-122.65	-114.158	-69.3299	34.87	52.64	NoMB_Durian_5_20250411_210714	1744380434	74	Outdoor air, Durian
Blue	-19.249	-90.3392	-80.6533	-43.5871	34.64	54.05	NoMB_Durian_5_20250411_211719	1744381040	74	Outdoor air, Durian
Blue	-24.9554	-47.404	-38.1763	-48.3001	40.35	41.15	NoMB_Durian_1_20250411_165358	1744365238	75	Outdoor air, Durian
Blue	-39.7517	-82.8411	-72.2861	-66.2229	39.66	42.84	NoMB_Durian_1_20250411_170359	1744365839	75	Outdoor air, Durian
Blue	-52.5684	-121.125	-111.71	-56.2108	38.76	45.74	NoMB_Durian_1_20250411_171400	1744366440	75	Outdoor air, Durian
Blue	-62.5615	-239.155	-231.317	-88.997	37.57	53.34	NoMB_Durian_2_20250411_175620	1744368981	75	Outdoor air, Durian
Blue	-62.6926	-242.717	-238.097	-79.2626	37.26	55.66	NoMB_Durian_2_20250411_180622	1744369582	75	Outdoor air, Durian
Blue	-61.8754	-243.778	-239.14	-115.862	36.95	56.34	NoMB_Durian_2_20250411_181623	1744370184	75	Outdoor air, Durian
Blue	-49.8802	-192.355	-189.081	-95.8289	35.5	57.78	NoMB_Durian_3_20250411_185747	1744372667	75	Outdoor air, Durian
Blue	-47.4804	-169.013	-164.194	-84.7891	35.51	55.96	NoMB_Durian_3_20250411_190748	1744373269	75	Outdoor air, Durian
Blue	-40.914	-165.125	-159.531	-81.6387	35.34	56.52	NoMB_Durian_3_20250411_191750	1744373871	75	Outdoor air, Durian
Blue	-41.7977	-148.019	-142.622	-42.5701	34.5	56.51	NoMB_Durian_4_20250411_195701	1744376222	75	Outdoor air, Durian
Blue	-38.6304	-140.297	-136.193	-75.6902	34.92	54.8	NoMB_Durian_4_20250411_200704	1744376825	75	Outdoor air, Durian
Blue	-13.3055	-107.529	-105.335	-40.2211	34.43	58.68	NoMB_Durian_4_20250411_201707	1744377427	75	Outdoor air, Durian
Blue	-28.5828	-98.8351	-90.0685	-44.6865	34.49	53.12	NoMB_Durian_5_20250411_205711	1744379831	75	Outdoor air, Durian
Blue	-43.2855	-122.702	-113.233	-69.1403	34.85	52.7	NoMB_Durian_5_20250411_210714	1744380434	75	Outdoor air, Durian
Blue	-19.1212	-89.3883	-80.6869	-43.3466	34.64	54.01	NoMB_Durian_5_20250411_211719	1744381040	75	Outdoor air, Durian
Blue	-22.3421	-42.2309	-32.0398	-46.9151	40.28	41.24	NoMB_Durian_1_20250411_165358	1744365238	76	Outdoor air, Durian
Blue	-39.8156	-84.3165	-73.7693	-66.3431	39.66	42.86	NoMB_Durian_1_20250411_170359	1744365839	76	Outdoor air, Durian
Blue	-51.421	-118.275	-109.873	-55.5658	38.73	45.77	NoMB_Durian_1_20250411_171400	1744366440	76	Outdoor air, Durian
Blue	-62.0841	-239.395	-231.6	-88.1079	37.55	53.45	NoMB_Durian_2_20250411_175620	1744368981	76	Outdoor air, Durian
Blue	-63.4903	-246.757	-242.183	-83.2591	37.27	55.78	NoMB_Durian_2_20250411_180622	1744369582	76	Outdoor air, Durian
Blue	-61.8754	-244.778	-239.14	-115.862	36.95	56.34	NoMB_Durian_2_20250411_181623	1744370184	76	Outdoor air, Durian
Blue	-48.3176	-186.416	-183.103	-94.4024	35.47	57.68	NoMB_Durian_3_20250411_185747	1744372667	76	Outdoor air, Durian
Blue	-46.4608	-167.114	-162.324	-85.3845	35.48	56.03	NoMB_Durian_3_20250411_190748	1744373269	76	Outdoor air, Durian
Blue	-40.5954	-164.651	-160.068	-82.5439	35.33	56.55	NoMB_Durian_3_20250411_191750	1744373871	76	Outdoor air, Durian
Blue	-41.6708	-148.971	-143.609	-40.8359	34.49	56.6	NoMB_Durian_4_20250411_195701	1744376222	76	Outdoor air, Durian
Blue	-38.4396	-140.773	-136.697	-75.8358	34.91	54.87	NoMB_Durian_4_20250411_200704	1744376825	76	Outdoor air, Durian
Blue	-12.6045	-106.105	-103.927	-39.9112	34.41	58.72	NoMB_Durian_4_20250411_201707	1744377427	76	Outdoor air, Durian
Blue	-27.9138	-97.6486	-88.9019	-45.4367	34.47	53.17	NoMB_Durian_5_20250411_205711	1744379831	76	Outdoor air, Durian
Blue	-41.6279	-117.952	-109.484	-69.0398	34.81	52.7	NoMB_Durian_5_20250411_210714	1744380434	76	Outdoor air, Durian
Blue	-17.7822	-86.1127	-76.4004	-43.3409	34.61	53.98	NoMB_Durian_5_20250411_211719	1744381040	76	Outdoor air, Durian
Blue	-23.5018	-43.4194	-33.2478	-46.2157	40.28	41.29	NoMB_Durian_1_20250411_165358	1744365238	77	Outdoor air, Durian
Blue	-38.828	-82.6557	-73.1402	-65.9986	39.63	42.94	NoMB_Durian_1_20250411_170359	1744365839	77	Outdoor air, Durian
Blue	-51.5807	-120.464	-112.081	-55.8663	38.73	45.82	NoMB_Durian_1_20250411_171400	1744366440	77	Outdoor air, Durian
Blue	-61.4142	-237.305	-228.48	-86.3519	37.54	53.37	NoMB_Durian_2_20250411_175620	1744368981	77	Outdoor air, Durian
Blue	-63.1522	-245.384	-240.85	-85.7596	37.23	55.88	NoMB_Durian_2_20250411_180622	1744369582	77	Outdoor air, Durian
Blue	-59.8673	-239.316	-233.687	-114.606	36.9	56.36	NoMB_Durian_2_20250411_181623	1744370184	77	Outdoor air, Durian
Blue	-48.1579	-186.227	-181.895	-94.1018	35.47	57.63	NoMB_Durian_3_20250411_185747	1744372667	77	Outdoor air, Durian
Blue	-46.876	-171.205	-165.464	-86.1659	35.48	56.16	NoMB_Durian_3_20250411_190748	1744373269	77	Outdoor air, Durian
Blue	-39.3203	-160.85	-156.265	-81.6583	35.3	56.54	NoMB_Durian_3_20250411_191750	1744373871	77	Outdoor air, Durian
Blue	-40.4596	-145.646	-140.289	-39.0706	34.46	56.61	NoMB_Durian_4_20250411_195701	1744376222	77	Outdoor air, Durian
Blue	-38.3127	-141.725	-137.684	-76.1017	34.9	54.96	NoMB_Durian_4_20250411_200704	1744376825	77	Outdoor air, Durian
Blue	-12.254	-105.393	-103.223	-39.7563	34.4	58.74	NoMB_Durian_4_20250411_201707	1744377427	77	Outdoor air, Durian
Blue	-27.6591	-98.6497	-89.9226	-45.4622	34.46	53.22	NoMB_Durian_5_20250411_205711	1744379831	77	Outdoor air, Durian
Blue	-41.3732	-117.953	-109.504	-69.0652	34.8	52.75	NoMB_Durian_5_20250411_210714	1744380434	77	Outdoor air, Durian
Blue	-16.5391	-83.5501	-72.8386	-42.5155	34.58	53.98	NoMB_Durian_5_20250411_211719	1744381040	77	Outdoor air, Durian
Blue	-22.1318	-41.8088	-31.6731	-42.6561	40.24	41.38	NoMB_Durian_1_20250411_165358	1744365238	78	Outdoor air, Durian
Blue	-37.394	-80.5697	-70.0824	-65.3189	39.59	43.01	NoMB_Durian_1_20250411_170359	1744365839	78	Outdoor air, Durian
Blue	-50.72	-117.851	-109.464	-55.2559	38.71	45.81	NoMB_Durian_1_20250411_171400	1744366440	78	Outdoor air, Durian
Blue	-61.1275	-238.069	-229.259	-85.3172	37.53	53.41	NoMB_Durian_2_20250411_175620	1744368981	78	Outdoor air, Durian
Blue	-64.587	-251.373	-245.861	-88.9457	37.26	55.94	NoMB_Durian_2_20250411_180622	1744369582	78	Outdoor air, Durian
Blue	-60.8558	-243.88	-237.269	-115.457	36.92	56.41	NoMB_Durian_2_20250411_181623	1744370184	78	Outdoor air, Durian
Blue	-46.3406	-180.288	-177.938	-92.7007	35.43	57.58	NoMB_Durian_3_20250411_185747	1744372667	78	Outdoor air, Durian
Blue	-45.6656	-169.783	-164.098	-86.9069	35.44	56.3	NoMB_Durian_3_20250411_190748	1744373269	78	Outdoor air, Durian
Blue	-38.9059	-160.663	-155.078	-81.3832	35.29	56.54	NoMB_Durian_3_20250411_191750	1744373871	78	Outdoor air, Durian
Blue	-39.7585	-144.222	-138.881	-36.7608	34.44	56.65	NoMB_Durian_4_20250411_195701	1744376222	78	Outdoor air, Durian
Blue	-36.4004	-137.976	-133.956	-75.0265	34.85	55.01	NoMB_Durian_4_20250411_200704	1744376825	78	Outdoor air, Durian
Blue	-11.2025	-103.257	-101.111	-39.2916	34.37	58.8	NoMB_Durian_4_20250411_201707	1744377427	78	Outdoor air, Durian
Blue	-29.0104	-101.265	-92.5801	-47.1234	34.46	53.33	NoMB_Durian_5_20250411_205711	1744379831	78	Outdoor air, Durian
Blue	-41.4691	-119.666	-110.229	-69.2456	34.8	52.78	NoMB_Durian_5_20250411_210714	1744380434	78	Outdoor air, Durian
Blue	-17.3678	-85.9251	-75.2131	-43.0658	34.6	53.98	NoMB_Durian_5_20250411_211719	1744381040	78	Outdoor air, Durian
Blue	-20.303	-39.4338	-30.2986	-38.1059	40.22	41.38	NoMB_Durian_1_20250411_165358	1744365238	79	Outdoor air, Durian
Blue	-38.1908	-83.707	-73.2153	-65.809	39.61	43	NoMB_Durian_1_20250411_170359	1744365839	79	Outdoor air, Durian
Blue	-50.019	-117.427	-109.056	-54.9461	38.69	45.85	NoMB_Durian_1_20250411_171400	1744366440	79	Outdoor air, Durian
Blue	-61.1595	-238.306	-229.5	-85.3773	37.53	53.42	NoMB_Durian_2_20250411_175620	1744368981	79	Outdoor air, Durian
Blue	-63.3438	-247.81	-242.299	-90.1203	37.23	55.94	NoMB_Durian_2_20250411_180622	1744369582	79	Outdoor air, Durian
Blue	-59.2621	-240.605	-234.003	-114.477	36.88	56.43	NoMB_Durian_2_20250411_181623	1744370184	79	Outdoor air, Durian
Blue	-46.1171	-179.624	-176.247	-92.28	35.43	57.51	NoMB_Durian_3_20250411_185747	1744372667	79	Outdoor air, Durian
Blue	-45.6984	-171.923	-167.293	-87.4733	35.43	56.44	NoMB_Durian_3_20250411_190748	1744373269	79	Outdoor air, Durian
Blue	-38.1729	-160.001	-154.428	-81.0133	35.27	56.57	NoMB_Durian_3_20250411_191750	1744373871	79	Outdoor air, Durian
Blue	-39.4719	-143.985	-138.66	-35.7261	34.43	56.69	NoMB_Durian_4_20250411_195701	1744376222	79	Outdoor air, Durian
Blue	-36.0499	-137.264	-133.252	-74.8716	34.84	55.03	NoMB_Durian_4_20250411_200704	1744376825	79	Outdoor air, Durian
Blue	-10.9158	-103.02	-100.89	-39.2569	34.36	58.84	NoMB_Durian_4_20250411_201707	1744377427	79	Outdoor air, Durian
Blue	-28.4372	-100.791	-92.1383	-47.054	34.44	53.41	NoMB_Durian_5_20250411_205711	1744379831	79	Outdoor air, Durian
Blue	-41.6607	-121.092	-111.679	-69.6062	34.8	52.84	NoMB_Durian_5_20250411_210714	1744380434	79	Outdoor air, Durian
Blue	-16.1566	-82.6003	-71.8929	-42.3005	34.57	53.99	NoMB_Durian_5_20250411_211719	1744381040	79	Outdoor air, Durian
Blue	-21.8336	-46.1358	-36.0346	-35.4723	40.25	41.47	NoMB_Durian_1_20250411_165358	1744365238	80	Outdoor air, Durian
Blue	-37.3301	-82.0942	-71.5992	-65.1986	39.59	42.99	NoMB_Durian_1_20250411_170359	1744365839	80	Outdoor air, Durian
Blue	-50.0829	-117.902	-109.539	-54.0663	38.69	45.87	NoMB_Durian_1_20250411_171400	1744366440	80	Outdoor air, Durian
Blue	-59.2153	-234.32	-224.53	-83.2421	37.48	53.46	NoMB_Durian_2_20250411_175620	1744368981	80	Outdoor air, Durian
Blue	-62.3243	-246.912	-241.429	-91.7157	37.2	56.01	NoMB_Durian_2_20250411_180622	1744369582	80	Outdoor air, Durian
Blue	-58.5611	-239.181	-232.595	-115.167	36.86	56.47	NoMB_Durian_2_20250411_181623	1744370184	80	Outdoor air, Durian
Blue	-46.149	-180.862	-176.489	-92.3401	35.43	57.52	NoMB_Durian_3_20250411_185747	1744372667	80	Outdoor air, Durian
Blue	-46.7836	-179.103	-174.553	-89.0108	35.44	56.65	NoMB_Durian_3_20250411_190748	1744373269	80	Outdoor air, Durian
Blue	-38.078	-161.191	-155.656	-81.3392	35.26	56.67	NoMB_Durian_3_20250411_191750	1744373871	80	Outdoor air, Durian
Blue	-39.6636	-145.411	-140.11	-35.0868	34.43	56.75	NoMB_Durian_4_20250411_195701	1744376222	80	Outdoor air, Durian
Blue	-36.4767	-137.791	-132.81	-75.8022	34.82	55.11	NoMB_Durian_4_20250411_200704	1744376825	80	Outdoor air, Durian
Blue	-11.1075	-105.446	-102.339	-39.6175	34.36	58.9	NoMB_Durian_4_20250411_201707	1744377427	80	Outdoor air, Durian
Blue	-28.2464	-102.268	-92.6422	-48.1996	34.43	53.48	NoMB_Durian_5_20250411_205711	1744379831	80	Outdoor air, Durian
Blue	-40.4814	-119.005	-108.6	-69.901	34.77	52.86	NoMB_Durian_5_20250411_210714	1744380434	80	Outdoor air, Durian
Blue	-16.838	-82.1259	-71.4305	-42.2057	34.56	54.02	NoMB_Durian_5_20250411_211719	1744381040	80	Outdoor air, Durian
Blue	-20.3358	-43.5743	-32.4936	-28.6723	40.21	41.52	NoMB_Durian_1_20250411_165358	1744365238	81	Outdoor air, Durian
Blue	-35.96	-80.4836	-70.0245	-63.6391	39.55	43.08	NoMB_Durian_1_20250411_170359	1744365839	81	Outdoor air, Durian
Blue	-49.8601	-120.141	-110.802	-54.1519	38.68	45.93	NoMB_Durian_1_20250411_171400	1744366440	81	Outdoor air, Durian
Blue	-59.375	-235.508	-226.738	-81.5426	37.48	53.51	NoMB_Durian_2_20250411_175620	1744368981	81	Outdoor air, Durian
Blue	-62.3243	-247.912	-242.429	-93.7157	37.2	56.01	NoMB_Durian_2_20250411_180622	1744369582	81	Outdoor air, Durian
Blue	-59.1787	-238.231	-232.649	-114.952	36.85	56.48	NoMB_Durian_2_20250411_181623	1744370184	81	Outdoor air, Durian
Blue	-44.7142	-175.873	-171.477	-91.154	35.4	57.46	NoMB_Durian_3_20250411_185747	1744372667	81	Outdoor air, Durian
Blue	-47.2431	-180.77	-176.306	-89.5078	35.41	56.87	NoMB_Durian_3_20250411_190748	1744373269	81	Outdoor air, Durian
Blue	-37.9953	-160.719	-155.256	-81.3207	35.22	56.85	NoMB_Durian_3_20250411_191750	1744373871	81	Outdoor air, Durian
Blue	-38.3246	-142.136	-135.823	-32.0811	34.4	56.72	NoMB_Durian_4_20250411_195701	1744376222	81	Outdoor air, Durian
Blue	-35.0108	-134.467	-130.51	-75.0624	34.78	55.17	NoMB_Durian_4_20250411_200704	1744376825	81	Outdoor air, Durian
Blue	-9.92821	-102.359	-99.2608	-38.9124	34.33	58.92	NoMB_Durian_4_20250411_201707	1744377427	81	Outdoor air, Durian
Blue	-27.8328	-102.983	-94.4084	-48.4308	34.41	53.61	NoMB_Durian_5_20250411_205711	1744379831	81	Outdoor air, Durian
Blue	-39.9082	-118.532	-109.158	-69.8317	34.75	52.94	NoMB_Durian_5_20250411_210714	1744380434	81	Outdoor air, Durian
Blue	-15.9773	-80.5132	-68.8144	-41.5953	34.54	54.01	NoMB_Durian_5_20250411_211719	1744381040	81	Outdoor air, Durian
Blue	-20.2399	-42.8611	-31.7688	-25.4919	40.21	41.49	NoMB_Durian_1_20250411_165358	1744365238	82	Outdoor air, Durian
Blue	-36.5022	-82.622	-72.1781	-65.1547	39.56	43.12	NoMB_Durian_1_20250411_170359	1744365839	82	Outdoor air, Durian
Blue	-49.1272	-119.479	-109.152	-51.7819	38.66	45.96	NoMB_Durian_1_20250411_171400	1744366440	82	Outdoor air, Durian
Blue	-58.6109	-236.511	-226.8	-78.6189	37.45	53.66	NoMB_Durian_2_20250411_175620	1744368981	82	Outdoor air, Durian
Blue	-61.113	-244.587	-239.109	-94.9504	37.17	56.02	NoMB_Durian_2_20250411_180622	1744369582	82	Outdoor air, Durian
Blue	-58.1263	-235.192	-228.584	-113.981	36.83	56.41	NoMB_Durian_2_20250411_181623	1744370184	82	Outdoor air, Durian
Blue	-44.9378	-178.537	-174.168	-92.5748	35.4	57.53	NoMB_Durian_3_20250411_185747	1744372667	82	Outdoor air, Durian
Blue	-47.3717	-183.623	-179.226	-90.2545	35.4	57.04	NoMB_Durian_3_20250411_190748	1744373269	82	Outdoor air, Durian
Blue	-38.4106	-163.81	-159.397	-82.1021	35.22	56.98	NoMB_Durian_3_20250411_191750	1744373871	82	Outdoor air, Durian
Blue	-39.1018	-142.374	-136.085	-31.1666	34.39	56.78	NoMB_Durian_4_20250411_195701	1744376222	82	Outdoor air, Durian
Blue	-35.1066	-136.18	-131.235	-75.2427	34.78	55.2	NoMB_Durian_4_20250411_200704	1744376825	82	Outdoor air, Durian
Blue	-9.76935	-103.073	-100.006	-39.1181	34.32	59	NoMB_Durian_4_20250411_201707	1744377427	82	Outdoor air, Durian
Blue	-26.335	-99.4215	-90.8673	-48.6308	34.37	53.66	NoMB_Durian_5_20250411_205711	1744379831	82	Outdoor air, Durian
Blue	-39.7493	-120.246	-109.904	-70.0374	34.74	53.02	NoMB_Durian_5_20250411_210714	1744380434	82	Outdoor air, Durian
Blue	-14.8619	-77.9015	-66.219	-41.0103	34.51	54.05	NoMB_Durian_5_20250411_211719	1744381040	82	Outdoor air, Durian
Blue	-19.2204	-41.9626	-30.8982	-21.0873	40.18	41.56	NoMB_Durian_1_20250411_165358	1744365238	83	Outdoor air, Durian
Blue	-35.7692	-81.9601	-71.5284	-64.7847	39.54	43.15	NoMB_Durian_1_20250411_170359	1744365839	83	Outdoor air, Durian
Blue	-47.9798	-116.63	-106.315	-49.1369	38.63	45.99	NoMB_Durian_1_20250411_171400	1744366440	83	Outdoor air, Durian
Blue	-59.1228	-242.218	-232.619	-80.087	37.44	53.95	NoMB_Durian_2_20250411_175620	1744368981	83	Outdoor air, Durian
Blue	-59.9018	-242.262	-236.788	-95.1851	37.14	56.03	NoMB_Durian_2_20250411_180622	1744369582	83	Outdoor air, Durian
Blue	-57.5841	-234.054	-227.43	-113.465	36.82	56.37	NoMB_Durian_2_20250411_181623	1744370184	83	Outdoor air, Durian
Blue	-44.5677	-175.927	-171.594	-92.0152	35.36	57.62	NoMB_Durian_3_20250411_185747	1744372667	83	Outdoor air, Durian
Blue	-45.81	-180.586	-175.202	-89.3343	35.36	57.07	NoMB_Durian_3_20250411_190748	1744373269	83	Outdoor air, Durian
Blue	-36.6261	-161.011	-155.635	-81.2675	35.17	57.07	NoMB_Durian_3_20250411_191750	1744373871	83	Outdoor air, Durian
Blue	-38.3689	-140.712	-134.436	-30.7966	34.37	56.81	NoMB_Durian_4_20250411_195701	1744376222	83	Outdoor air, Durian
Blue	-34.0551	-134.044	-129.123	-74.778	34.75	55.26	NoMB_Durian_4_20250411_200704	1744376825	83	Outdoor air, Durian
Blue	-8.78171	-101.412	-99.3773	-38.7736	34.29	59.08	NoMB_Durian_4_20250411_201707	1744377427	83	Outdoor air, Durian
Blue	-27.2915	-102.747	-94.2082	-50.4215	34.39	53.7	NoMB_Durian_5_20250411_205711	1744379831	83	Outdoor air, Durian
Blue	-39.4431	-118.111	-107.812	-69.5981	34.7	53.13	NoMB_Durian_5_20250411_210714	1744380434	83	Outdoor air, Durian
Blue	-14.5753	-77.6649	-66.9981	-40.9756	34.5	54.09	NoMB_Durian_5_20250411_211719	1744381040	83	Outdoor air, Durian
Blue	-18.8379	-41.0128	-29.9525	-20.8723	40.17	41.57	NoMB_Durian_1_20250411_165358	1744365238	84	Outdoor air, Durian
Blue	-34.9724	-80.8228	-69.3954	-64.2946	39.52	43.16	NoMB_Durian_1_20250411_170359	1744365839	84	Outdoor air, Durian
Blue	-48.1076	-117.581	-108.281	-49.3773	38.63	46.03	NoMB_Durian_1_20250411_171400	1744366440	84	Outdoor air, Durian
Blue	-60.444	-249.4	-239.942	-81.7007	37.42	54.31	NoMB_Durian_2_20250411_175620	1744368981	84	Outdoor air, Durian
Blue	-60.5194	-241.312	-235.843	-94.9701	37.13	56.04	NoMB_Durian_2_20250411_180622	1744369582	84	Outdoor air, Durian
Blue	-57.042	-232.915	-226.277	-113.95	36.81	56.33	NoMB_Durian_2_20250411_181623	1744370184	84	Outdoor air, Durian
Blue	-43.9625	-175.216	-170.91	-91.8857	35.34	57.69	NoMB_Durian_3_20250411_185747	1744372667	84	Outdoor air, Durian
Blue	-45.267	-176.545	-171.095	-89.3125	35.36	56.9	NoMB_Durian_3_20250411_190748	1744373269	84	Outdoor air, Durian
Blue	-37.0094	-163.864	-158.534	-81.9888	35.17	57.19	NoMB_Durian_3_20250411_191750	1744373871	84	Outdoor air, Durian
Blue	-36.5082	-138.1	-131.82	-30.1863	34.35	56.8	NoMB_Durian_4_20250411_195701	1744376222	84	Outdoor air, Durian
Blue	-35.1713	-138.558	-133.672	-75.8692	34.77	55.35	NoMB_Durian_4_20250411_200704	1744376825	84	Outdoor air, Durian
Blue	-7.69825	-99.0385	-97.0234	-38.2487	34.26	59.13	NoMB_Durian_4_20250411_201707	1744377427	84	Outdoor air, Durian
Blue	-25.7617	-98.9482	-90.4255	-49.5614	34.35	53.74	NoMB_Durian_5_20250411_205711	1744379831	84	Outdoor air, Durian
Blue	-39.6028	-119.299	-109.02	-69.8986	34.7	53.18	NoMB_Durian_5_20250411_210714	1744380434	84	Outdoor air, Durian
Blue	-14.2887	-77.4282	-66.7772	-40.9409	34.49	54.13	NoMB_Durian_5_20250411_211719	1744381040	84	Outdoor air, Durian
Blue	-17.6586	-38.9257	-26.8739	-20.1671	40.14	41.59	NoMB_Durian_1_20250411_165358	1744365238	85	Outdoor air, Durian
Blue	-34.0806	-79.8751	-68.4912	-64.1304	39.49	43.27	NoMB_Durian_1_20250411_170359	1744365839	85	Outdoor air, Durian
Blue	-47.7571	-117.869	-107.577	-49.2224	38.62	46.05	NoMB_Durian_1_20250411_171400	1744366440	85	Outdoor air, Durian
Blue	-60.9239	-254.869	-245.519	-83.1086	37.41	54.59	NoMB_Durian_2_20250411_175620	1744368981	85	Outdoor air, Durian
Blue	-59.372	-239.463	-234.006	-95.325	37.1	56.07	NoMB_Durian_2_20250411_180622	1744369582	85	Outdoor air, Durian
Blue	-55.6711	-228.402	-221.748	-112.884	36.78	56.29	NoMB_Durian_2_20250411_181623	1744370184	85	Outdoor air, Durian
Blue	-44.1222	-177.404	-173.118	-92.1863	35.34	57.74	NoMB_Durian_3_20250411_185747	1744372667	85	Outdoor air, Durian
Blue	-43.1295	-167.327	-161.769	-86.804	35.33	56.62	NoMB_Durian_3_20250411_190748	1744373269	85	Outdoor air, Durian
Blue	-36.4681	-164.628	-158.334	-81.9795	35.15	57.28	NoMB_Durian_3_20250411_191750	1744373871	85	Outdoor air, Durian
Blue	-35.6794	-135.725	-130.445	-29.636	34.33	56.8	NoMB_Durian_4_20250411_195701	1744376222	85	Outdoor air, Durian
Blue	-33.2591	-133.809	-128.943	-73.7941	34.72	55.4	NoMB_Durian_4_20250411_200704	1744376825	85	Outdoor air, Durian
Blue	-7.85795	-100.227	-98.2314	-37.5493	34.26	59.18	NoMB_Durian_4_20250411_201707	1744377427	85	Outdoor air, Durian
Blue	-26.3358	-102.324	-92.8207	-50.1371	34.36	53.79	NoMB_Durian_5_20250411_205711	1744379831	85	Outdoor air, Durian
Blue	-39.7625	-121.488	-110.228	-70.1992	34.7	53.23	NoMB_Durian_5_20250411_210714	1744380434	85	Outdoor air, Durian
Blue	-13.1094	-75.3411	-63.6986	-40.2358	34.46	54.15	NoMB_Durian_5_20250411_211719	1744381040	85	Outdoor air, Durian
Blue	-17.5628	-39.2125	-27.1492	-23.9868	40.14	41.56	NoMB_Durian_1_20250411_165358	1744365238	86	Outdoor air, Durian
Blue	-32.9652	-78.2634	-66.8958	-63.5454	39.46	43.31	NoMB_Durian_1_20250411_170359	1744365839	86	Outdoor air, Durian
Blue	-46.1954	-114.832	-104.553	-48.3022	38.58	46.08	NoMB_Durian_1_20250411_171400	1744366440	86	Outdoor air, Durian
Blue	-61.8183	-262.525	-252.284	-84.7917	37.41	54.87	NoMB_Durian_2_20250411_175620	1744368981	86	Outdoor air, Durian
Blue	-60.1688	-242.6	-236.139	-97.8152	37.12	56.06	NoMB_Durian_2_20250411_180622	1744369582	86	Outdoor air, Durian
Blue	-55.7349	-229.877	-222.232	-113.004	36.78	56.31	NoMB_Durian_2_20250411_181623	1744370184	86	Outdoor air, Durian
Blue	-43.6128	-177.406	-173.16	-92.2371	35.32	57.84	NoMB_Durian_3_20250411_185747	1744372667	86	Outdoor air, Durian
Blue	-42.4915	-164.475	-158.89	-86.1081	35.32	56.55	NoMB_Durian_3_20250411_190748	1744373269	86	Outdoor air, Durian
Blue	-35.7351	-162.967	-156.684	-81.6096	35.13	57.31	NoMB_Durian_3_20250411_191750	1744373871	86	Outdoor air, Durian
Blue	-36.4886	-137.201	-130.949	-30.7816	34.32	56.87	NoMB_Durian_4_20250411_195701	1744376222	86	Outdoor air, Durian
Blue	-33.1641	-134.999	-131.172	-74.1201	34.71	55.5	NoMB_Durian_4_20250411_200704	1744376825	86	Outdoor air, Durian
Blue	-7.63521	-100.466	-98.4937	-37.6348	34.25	59.24	NoMB_Durian_4_20250411_201707	1744377427	86	Outdoor air, Durian
Blue	-26.3997	-102.8	-93.3039	-50.2573	34.36	53.81	NoMB_Durian_5_20250411_205711	1744379831	86	Outdoor air, Durian
Blue	-39.1254	-120.539	-110.303	-70.0096	34.68	53.29	NoMB_Durian_5_20250411_210714	1744380434	86	Outdoor air, Durian
Blue	-12.3764	-73.6792	-63.0489	-39.8658	34.44	54.18	NoMB_Durian_5_20250411_211719	1744381040	86	Outdoor air, Durian
Blue	-16.6071	-38.7894	-25.7617	-27.7024	40.11	41.65	NoMB_Durian_1_20250411_165358	1744365238	87	Outdoor air, Durian
Blue	-32.8382	-80.2154	-67.8828	-60.8113	39.45	43.4	NoMB_Durian_1_20250411_170359	1744365839	87	Outdoor air, Durian
Blue	-46.7056	-116.732	-107.465	-48.7576	38.59	46.11	NoMB_Durian_1_20250411_171400	1744366440	87	Outdoor air, Durian
Blue	-60.7987	-260.626	-250.413	-84.3871	37.38	54.94	NoMB_Durian_2_20250411_175620	1744368981	87	Outdoor air, Durian
Blue	-57.6186	-235	-228.532	-96.0441	37.06	56.04	NoMB_Durian_2_20250411_180622	1744369582	87	Outdoor air, Durian
Blue	-54.2051	-226.078	-219.449	-112.144	36.74	56.35	NoMB_Durian_2_20250411_181623	1744370184	87	Outdoor air, Durian
Blue	-43.4229	-180.786	-175.617	-93.8891	35.3	58.04	NoMB_Durian_3_20250411_185747	1744372667	87	Outdoor air, Durian
Blue	-42.5251	-169.519	-164.039	-88.1808	35.3	56.82	NoMB_Durian_3_20250411_190748	1744373269	87	Outdoor air, Durian
Blue	-36.5639	-166.342	-159.058	-82.1598	35.15	57.31	NoMB_Durian_3_20250411_191750	1744373871	87	Outdoor air, Durian
Blue	-36.1381	-137.489	-130.245	-32.6267	34.31	56.89	NoMB_Durian_4_20250411_195701	1744376222	87	Outdoor air, Durian
Blue	-32.9413	-136.238	-131.434	-74.2056	34.7	55.56	NoMB_Durian_4_20250411_200704	1744376825	87	Outdoor air, Durian
Blue	-6.55175	-98.0918	-96.1399	-37.11	34.22	59.29	NoMB_Durian_4_20250411_201707	1744377427	87	Outdoor air, Durian
Blue	-25.3162	-100.426	-90.9501	-49.7325	34.33	53.86	NoMB_Durian_5_20250411_205711	1744379831	87	Outdoor air, Durian
Blue	-38.0419	-118.165	-107.949	-69.4847	34.65	53.34	NoMB_Durian_5_20250411_210714	1744380434	87	Outdoor air, Durian
Blue	-12.4084	-73.9169	-63.2905	-39.9259	34.44	54.19	NoMB_Durian_5_20250411_211719	1744381040	87	Outdoor air, Durian
Blue	-14.9815	-34.2771	-21.2543	-26.662	40.07	41.66	NoMB_Durian_1_20250411_165358	1744365238	88	Outdoor air, Durian
Blue	-31.7228	-77.6037	-65.2874	-56.2263	39.42	43.44	NoMB_Durian_1_20250411_170359	1744365839	88	Outdoor air, Durian
Blue	-45.08	-112.22	-103.958	-48.7172	38.55	46.12	NoMB_Durian_1_20250411_171400	1744366440	88	Outdoor air, Durian
Blue	-60.7029	-259.913	-249.688	-80.2067	37.38	54.91	NoMB_Durian_2_20250411_175620	1744368981	88	Outdoor air, Durian
Blue	-57.9176	-233.575	-228.124	-97.7343	37.04	56.08	NoMB_Durian_2_20250411_180622	1744369582	88	Outdoor air, Durian
Blue	-53.7277	-227.318	-219.732	-113.255	36.72	56.46	NoMB_Durian_2_20250411_181623	1744370184	88	Outdoor air, Durian
Blue	-42.6793	-184.59	-179.503	-93.8762	35.29	58.25	NoMB_Durian_3_20250411_185747	1744372667	88	Outdoor air, Durian
Blue	-42.8454	-174.798	-168.408	-89.2882	35.29	57.05	NoMB_Durian_3_20250411_190748	1744373269	88	Outdoor air, Durian
Blue	-34.5239	-160.642	-153.364	-80.8443	35.1	57.32	NoMB_Durian_3_20250411_191750	1744373871	88	Outdoor air, Durian
Blue	-36.2019	-137.965	-130.728	-34.7469	34.31	56.91	NoMB_Durian_4_20250411_195701	1744376222	88	Outdoor air, Durian
Blue	-32.9094	-136	-131.193	-74.1455	34.7	55.55	NoMB_Durian_4_20250411_200704	1744376825	88	Outdoor air, Durian
Blue	-5.75491	-96.9545	-94.007	-36.6198	34.2	59.3	NoMB_Durian_4_20250411_201707	1744377427	88	Outdoor air, Durian
Blue	-25.0935	-100.665	-91.2124	-50.818	34.32	53.92	NoMB_Durian_5_20250411_205711	1744379831	88	Outdoor air, Durian
Blue	-38.0108	-120.83	-109.661	-69.9309	34.64	53.46	NoMB_Durian_5_20250411_210714	1744380434	88	Outdoor air, Durian
Blue	-10.8786	-71.1178	-59.5078	-39.0659	34.4	54.23	NoMB_Durian_5_20250411_211719	1744381040	88	Outdoor air, Durian
Blue	-15.6195	-38.1286	-25.1327	-27.3579	40.08	41.73	NoMB_Durian_1_20250411_165358	1744365238	89	Outdoor air, Durian
Blue	-31.5001	-78.8425	-66.5497	-51.3119	39.41	43.5	NoMB_Durian_1_20250411_170359	1744365839	89	Outdoor air, Durian
Blue	-44.8572	-113.459	-104.22	-49.8028	38.54	46.18	NoMB_Durian_1_20250411_171400	1744366440	89	Outdoor air, Durian
Blue	-57.3745	-250.171	-239.866	-74.8439	37.34	54.7	NoMB_Durian_2_20250411_175620	1744368981	89	Outdoor air, Durian
Blue	-57.5352	-233.626	-227.178	-99.5193	37.03	56.09	NoMB_Durian_2_20250411_180622	1744369582	89	Outdoor air, Durian
Blue	-53.4411	-228.081	-220.511	-113.22	36.71	56.5	NoMB_Durian_2_20250411_181623	1744370184	89	Outdoor air, Durian
Blue	-42.2453	-182.504	-176.445	-94.1965	35.25	58.32	NoMB_Durian_3_20250411_185747	1744372667	89	Outdoor air, Durian
Blue	-42.6235	-176.94	-170.624	-89.88	35.27	57.24	NoMB_Durian_3_20250411_190748	1744373269	89	Outdoor air, Durian
Blue	-33.6632	-158.029	-151.748	-81.2339	35.08	57.31	NoMB_Durian_3_20250411_191750	1744373871	89	Outdoor air, Durian
Blue	-34.6083	-133.69	-126.462	-36.7666	34.27	56.93	NoMB_Durian_4_20250411_195701	1744376222	89	Outdoor air, Durian
Blue	-30.9652	-131.013	-126.223	-73.0103	34.65	55.59	NoMB_Durian_4_20250411_200704	1744376825	89	Outdoor air, Durian
Blue	-5.88267	-97.9054	-94.9733	-36.8603	34.2	59.34	NoMB_Durian_4_20250411_201707	1744377427	89	Outdoor air, Durian
Blue	-24.6791	-100.477	-90.0251	-50.5429	34.31	53.92	NoMB_Durian_5_20250411_205711	1744379831	89	Outdoor air, Durian
Blue	-37.0551	-119.407	-108.274	-69.6465	34.61	53.55	NoMB_Durian_5_20250411_210714	1744380434	89	Outdoor air, Durian
Blue	-12.3453	-76.3443	-64.7607	-40.312	34.43	54.3	NoMB_Durian_5_20250411_211719	1744381040	89	Outdoor air, Durian
Blue	-14.7915	-37.6564	-24.7116	-25.3139	40.05	41.86	NoMB_Durian_1_20250411_165358	1744365238	90	Outdoor air, Durian
Blue	-30.7991	-78.4183	-65.1416	-49.002	39.39	43.54	NoMB_Durian_1_20250411_170359	1744365839	90	Outdoor air, Durian
Blue	-45.4313	-116.835	-106.615	-53.3784	38.55	46.23	NoMB_Durian_1_20250411_171400	1744366440	90	Outdoor air, Durian
Blue	-54.9496	-238.813	-228.365	-71.7944	37.31	54.33	NoMB_Durian_2_20250411_175620	1744368981	90	Outdoor air, Durian
Blue	-57.631	-235.339	-228.903	-99.6996	37.03	56.12	NoMB_Durian_2_20250411_180622	1744369582	90	Outdoor air, Durian
Blue	-53.5369	-228.794	-221.236	-113.4	36.71	56.53	NoMB_Durian_2_20250411_181623	1744370184	90	Outdoor air, Durian
Blue	-42.5008	-184.406	-178.378	-94.6774	35.25	58.4	NoMB_Durian_3_20250411_185747	1744372667	90	Outdoor air, Durian
Blue	-41.1895	-173.854	-167.566	-89.2003	35.23	57.31	NoMB_Durian_3_20250411_190748	1744373269	90	Outdoor air, Durian
Blue	-32.9941	-156.843	-151.581	-80.9842	35.06	57.36	NoMB_Durian_3_20250411_191750	1744373871	90	Outdoor air, Durian
Blue	-36.5968	-137.254	-131.045	-41.6175	34.29	56.98	NoMB_Durian_4_20250411_195701	1744376222	90	Outdoor air, Durian
Blue	-31.2634	-128.686	-122.861	-72.1941	34.64	55.5	NoMB_Durian_4_20250411_200704	1744376825	90	Outdoor air, Durian
Blue	-4.76727	-95.2937	-92.3779	-36.2753	34.17	59.38	NoMB_Durian_4_20250411_201707	1744377427	90	Outdoor air, Durian
Blue	-23.309	-97.8664	-88.4504	-49.9833	34.27	54.01	NoMB_Durian_5_20250411_205711	1744379831	90	Outdoor air, Durian
Blue	-36.8643	-120.884	-109.778	-69.7921	34.6	53.62	NoMB_Durian_5_20250411_210714	1744380434	90	Outdoor air, Durian
Blue	-11.4216	-75.1589	-63.6148	-40.0877	34.4	54.4	NoMB_Durian_5_20250411_211719	1744381040	90	Outdoor air, Durian
Blue	-14.9193	-40.6072	-26.678	-22.5543	40.05	41.9	NoMB_Durian_1_20250411_165358	1744365238	91	Outdoor air, Durian
Blue	-30.0981	-76.9941	-64.7334	-48.6922	39.37	43.58	NoMB_Durian_1_20250411_170359	1744365839	91	Outdoor air, Durian
Blue	-44.284	-114.985	-103.778	-52.7334	38.52	46.26	NoMB_Durian_1_20250411_171400	1744366440	91	Outdoor air, Durian
Blue	-53.3533	-229.83	-219.239	-69.2952	37.3	53.96	NoMB_Durian_2_20250411_175620	1744368981	91	Outdoor air, Durian
Blue	-56.3878	-231.776	-225.341	-99.8742	37	56.12	NoMB_Durian_2_20250411_180622	1744369582	91	Outdoor air, Durian
Blue	-52.071	-225.471	-217.936	-112.661	36.67	56.59	NoMB_Durian_2_20250411_181623	1744370184	91	Outdoor air, Durian
Blue	-41.6082	-181.555	-175.52	-94.0069	35.23	58.38	NoMB_Durian_3_20250411_185747	1744372667	91	Outdoor air, Durian
Blue	-42.2738	-178.131	-172.873	-90.2314	35.25	57.39	NoMB_Durian_3_20250411_190748	1744373269	91	Outdoor air, Durian
Blue	-31.8787	-155.231	-148.986	-80.3992	35.03	57.4	NoMB_Durian_3_20250411_191750	1744373871	91	Outdoor air, Durian
Blue	-35.4175	-135.166	-127.966	-42.9123	34.26	57	NoMB_Durian_4_20250411_195701	1744376222	91	Outdoor air, Durian
Blue	-29.2536	-120.419	-114.501	-70.9261	34.61	55.26	NoMB_Durian_4_20250411_200704	1744376825	91	Outdoor air, Durian
Blue	-4.32094	-94.8685	-90.9491	-35.9401	34.16	59.37	NoMB_Durian_4_20250411_201707	1744377427	91	Outdoor air, Durian
Blue	-23.5007	-100.293	-89.9	-50.344	34.27	54.07	NoMB_Durian_5_20250411_205711	1744379831	91	Outdoor air, Durian
Blue	-35.2706	-116.609	-105.512	-68.8118	34.56	53.64	NoMB_Durian_5_20250411_210714	1744380434	91	Outdoor air, Durian
Blue	-9.79596	-71.6466	-59.1074	-40.0473	34.36	54.41	NoMB_Durian_5_20250411_211719	1744381040	91	Outdoor air, Durian
Blue	-14.8243	-41.7969	-27.9066	-20.8803	40.04	42	NoMB_Durian_1_20250411_165358	1744365238	92	Outdoor air, Durian
Blue	-30.2578	-79.1827	-65.9414	-48.9928	39.37	43.63	NoMB_Durian_1_20250411_170359	1744365839	92	Outdoor air, Durian
Blue	-43.9654	-114.511	-104.316	-52.6386	38.51	46.29	NoMB_Durian_1_20250411_171400	1744366440	92	Outdoor air, Durian
Blue	-51.8849	-221.798	-210.08	-68.0364	37.29	53.63	NoMB_Durian_2_20250411_175620	1744368981	92	Outdoor air, Durian
Blue	-55.591	-230.639	-223.208	-99.3841	36.98	56.13	NoMB_Durian_2_20250411_180622	1744369582	92	Outdoor air, Durian
Blue	-52.1988	-227.421	-219.903	-109.901	36.67	56.63	NoMB_Durian_2_20250411_181623	1744370184	92	Outdoor air, Durian
Blue	-41.4484	-181.367	-175.312	-93.7063	35.23	58.33	NoMB_Durian_3_20250411_185747	1744372667	92	Outdoor air, Durian
Blue	-40.1699	-172.955	-166.695	-88.7956	35.2	57.38	NoMB_Durian_3_20250411_190748	1744373269	92	Outdoor air, Durian
Blue	-33.1023	-156.895	-150.677	-80.82	35.03	57.47	NoMB_Durian_3_20250411_191750	1744373871	92	Outdoor air, Durian
Blue	-34.2062	-131.842	-124.646	-44.147	34.23	57.01	NoMB_Durian_4_20250411_195701	1744376222	92	Outdoor air, Durian
Blue	-28.1995	-112.574	-106.529	-68.9425	34.61	54.93	NoMB_Durian_4_20250411_200704	1744376825	92	Outdoor air, Durian
Blue	-2.63144	-89.8807	-86.9585	-35.7794	34.12	59.36	NoMB_Durian_4_20250411_201707	1744377427	92	Outdoor air, Durian
Blue	-23.246	-100.294	-89.9207	-50.3694	34.26	54.12	NoMB_Durian_5_20250411_205711	1744379831	92	Outdoor air, Durian
Blue	-35.5262	-119.511	-107.445	-70.2927	34.56	53.72	NoMB_Durian_5_20250411_210714	1744380434	92	Outdoor air, Durian
Blue	-9.95566	-72.8351	-60.3154	-40.3479	34.36	54.46	NoMB_Durian_5_20250411_211719	1744381040	92	Outdoor air, Durian
Blue	-14.7932	-43.4619	-29.6184	-21.3265	40.03	42.12	NoMB_Durian_1_20250411_165358	1744365238	93	Outdoor air, Durian
Blue	-28.3455	-75.4337	-63.2131	-48.9177	39.32	43.68	NoMB_Durian_1_20250411_170359	1744365839	93	Outdoor air, Durian
Blue	-43.5199	-114.989	-104.84	-52.8096	38.49	46.41	NoMB_Durian_1_20250411_171400	1744366440	93	Outdoor air, Durian
Blue	-51.002	-212.578	-199.733	-66.5025	37.27	53.3	NoMB_Durian_2_20250411_175620	1744368981	93	Outdoor air, Durian
Blue	-55.0497	-231.403	-224.008	-100.375	36.96	56.22	NoMB_Durian_2_20250411_180622	1744369582	93	Outdoor air, Durian
Blue	-51.4978	-225.997	-218.495	-104.591	36.65	56.67	NoMB_Durian_2_20250411_181623	1744370184	93	Outdoor air, Durian
Blue	-39.8867	-177.33	-172.288	-93.7861	35.19	58.36	NoMB_Durian_3_20250411_185747	1744372667	93	Outdoor air, Durian
Blue	-41.0626	-175.806	-169.553	-89.4661	35.22	57.4	NoMB_Durian_3_20250411_190748	1744373269	93	Outdoor air, Durian
Blue	-32.0188	-155.521	-149.323	-80.2951	35	57.52	NoMB_Durian_3_20250411_191750	1744373871	93	Outdoor air, Durian
Blue	-34.2062	-131.842	-125.646	-48.147	34.23	57.01	NoMB_Durian_4_20250411_195701	1744376222	93	Outdoor air, Durian
Blue	-25.8704	-100.929	-95.7532	-67.0733	34.58	54.59	NoMB_Durian_4_20250411_200704	1744376825	93	Outdoor air, Durian
Blue	-3.5995	-89.643	-86.7169	-35.7193	34.12	59.35	NoMB_Durian_4_20250411_201707	1744377427	93	Outdoor air, Durian
Blue	-22.2264	-98.3952	-88.0501	-49.9648	34.23	54.19	NoMB_Durian_5_20250411_205711	1744379831	93	Outdoor air, Durian
Blue	-35.7498	-121.175	-109.136	-69.7135	34.56	53.79	NoMB_Durian_5_20250411_210714	1744380434	93	Outdoor air, Durian
Blue	-8.80832	-69.9858	-57.4784	-39.7028	34.33	54.49	NoMB_Durian_5_20250411_211719	1744381040	93	Outdoor air, Durian
Blue	-15.0283	-42.5624	-28.7271	-20.8964	40.01	42.14	NoMB_Durian_1_20250411_165358	1744365238	94	Outdoor air, Durian
Blue	-28.5691	-78.0977	-64.9042	-52.3384	39.32	43.75	NoMB_Durian_1_20250411_170359	1744365839	94	Outdoor air, Durian
Blue	-42.6592	-113.376	-102.224	-52.1992	38.47	46.4	NoMB_Durian_1_20250411_171400	1744366440	94	Outdoor air, Durian
Blue	-49.2798	-205.45	-192.547	-64.7755	37.24	53.15	NoMB_Durian_2_20250411_175620	1744368981	94	Outdoor air, Durian
Blue	-55.401	-234.018	-226.666	-102.036	36.96	56.33	NoMB_Durian_2_20250411_180622	1744369582	94	Outdoor air, Durian
Blue	-51.3708	-227.949	-219.482	-102.857	36.64	56.76	NoMB_Durian_2_20250411_181623	1744370184	94	Outdoor air, Durian
Blue	-38.9302	-175.004	-168.947	-92.9954	35.17	58.32	NoMB_Durian_3_20250411_185747	1744372667	94	Outdoor air, Durian
Blue	-40.6295	-175.623	-168.448	-89.2926	35.17	57.6	NoMB_Durian_3_20250411_190748	1744373269	94	Outdoor air, Durian
Blue	-32.9115	-158.371	-152.181	-80.9656	35.02	57.54	NoMB_Durian_3_20250411_191750	1744373871	94	Outdoor air, Durian
Blue	-33.2186	-131.181	-124.017	-49.8025	34.2	57.09	NoMB_Durian_4_20250411_195701	1744376222	94	Outdoor air, Durian
Blue	-24.5927	-92.4207	-86.0896	-64.6689	34.58	54.19	NoMB_Durian_4_20250411_200704	1744376825	94	Outdoor air, Durian
Blue	-2.70684	-86.7926	-83.8592	-35.0488	34.1	59.33	NoMB_Durian_4_20250411_201707	1744377427	94	Outdoor air, Durian
Blue	-22.4181	-99.8215	-89.4996	-49.3254	34.23	54.25	NoMB_Durian_5_20250411_205711	1744379831	94	Outdoor air, Durian
Blue	-33.487	-115.714	-103.703	-69.4835	34.5	53.86	NoMB_Durian_5_20250411_210714	1744380434	94	Outdoor air, Durian
Blue	-8.96802	-71.1743	-58.6863	-40.0033	34.33	54.54	NoMB_Durian_5_20250411_211719	1744381040	94	Outdoor air, Durian
Blue	-13.5944	-39.4763	-25.6692	-20.2167	39.97	42.21	NoMB_Durian_1_20250411_165358	1744365238	95	Outdoor air, Durian
Blue	-28.3464	-78.3365	-65.1665	-52.4239	39.31	43.81	NoMB_Durian_1_20250411_170359	1744365839	95	Outdoor air, Durian
Blue	-42.0221	-113.427	-101.299	-51.0096	38.45	46.46	NoMB_Durian_1_20250411_171400	1744366440	95	Outdoor air, Durian
Blue	-48.9923	-204.311	-191.373	-65.2345	37.24	53.06	NoMB_Durian_2_20250411_175620	1744368981	95	Outdoor air, Durian
Blue	-55.2422	-235.732	-228.411	-103.242	36.95	56.41	NoMB_Durian_2_20250411_180622	1744369582	95	Outdoor air, Durian
Blue	-51.1162	-228.95	-220.502	-99.8824	36.63	56.81	NoMB_Durian_2_20250411_181623	1744370184	95	Outdoor air, Durian
Blue	-38.325	-174.293	-168.264	-92.8659	35.15	58.39	NoMB_Durian_3_20250411_185747	1744372667	95	Outdoor air, Durian
Blue	-41.3961	-181.328	-174.247	-90.7353	35.17	57.84	NoMB_Durian_3_20250411_190748	1744373269	95	Outdoor air, Durian
Blue	-30.5849	-153.435	-146.265	-79.6154	34.96	57.59	NoMB_Durian_3_20250411_191750	1744373871	95	Outdoor air, Durian
Blue	-33.4102	-132.607	-126.466	-51.1631	34.2	57.15	NoMB_Durian_4_20250411_195701	1744376222	95	Outdoor air, Durian
Blue	-23.4756	-87.0035	-80.5873	-63.0714	34.57	53.97	NoMB_Durian_4_20250411_200704	1744376825	95	Outdoor air, Durian
Blue	-1.81418	-83.9421	-81.0015	-34.3783	34.08	59.31	NoMB_Durian_4_20250411_201707	1744377427	95	Outdoor air, Durian
Blue	-21.4304	-98.1607	-87.8706	-45.9809	34.2	54.33	NoMB_Durian_5_20250411_205711	1744379831	95	Outdoor air, Durian
Blue	-33.7106	-117.378	-105.394	-69.9042	34.5	53.93	NoMB_Durian_5_20250411_210714	1744380434	95	Outdoor air, Durian
Blue	-7.37435	-67.8997	-54.4205	-39.023	34.29	54.56	NoMB_Durian_5_20250411_211719	1744381040	95	Outdoor air, Durian
Blue	-13.6263	-40.714	-26.9108	-20.2768	39.97	42.22	NoMB_Durian_1_20250411_165358	1744365238	96	Outdoor air, Durian
Blue	-27.3587	-77.6757	-64.5375	-52.0794	39.28	43.89	NoMB_Durian_1_20250411_170359	1744365839	96	Outdoor air, Durian
Blue	-42.054	-113.665	-102.541	-49.0698	38.45	46.47	NoMB_Durian_1_20250411_171400	1744366440	96	Outdoor air, Durian
Blue	-48.2585	-200.746	-187.77	-66.3583	37.23	52.96	NoMB_Durian_2_20250411_175620	1744368981	96	Outdoor air, Durian
Blue	-54.7967	-236.21	-228.936	-103.413	36.93	56.53	NoMB_Durian_2_20250411_180622	1744369582	96	Outdoor air, Durian
Blue	-50.0966	-227.052	-218.632	-96.4778	36.6	56.88	NoMB_Durian_2_20250411_181623	1744370184	96	Outdoor air, Durian
Blue	-38.7713	-176.718	-169.693	-93.2012	35.16	58.4	NoMB_Durian_3_20250411_185747	1744372667	96	Outdoor air, Durian
Blue	-41.4297	-185.371	-178.395	-91.808	35.15	58.11	NoMB_Durian_3_20250411_190748	1744373269	96	Outdoor air, Durian
Blue	-30.0436	-153.199	-146.065	-79.6061	34.94	57.68	NoMB_Durian_3_20250411_191750	1744373871	96	Outdoor air, Durian
Blue	-33.1875	-133.846	-126.729	-53.2487	34.19	57.21	NoMB_Durian_4_20250411_195701	1744376222	96	Outdoor air, Durian
Blue	-21.2751	-79.2123	-71.7313	-60.949	34.53	53.8	NoMB_Durian_4_20250411_200704	1744376825	96	Outdoor air, Durian
Blue	-0.79375	-80.1408	-77.1775	-33.4674	34.06	59.25	NoMB_Durian_4_20250411_201707	1744377427	96	Outdoor air, Durian
Blue	-21.3674	-100.588	-89.3408	-45.367	34.19	54.44	NoMB_Durian_5_20250411_205711	1744379831	96	Outdoor air, Durian
Blue	-33.5952	-115.766	-102.799	-69.3193	34.47	53.97	NoMB_Durian_5_20250411_210714	1744380434	96	Outdoor air, Durian
Blue	-8.33089	-71.2256	-58.7614	-39.8137	34.31	54.6	NoMB_Durian_5_20250411_211719	1744381040	96	Outdoor air, Durian
Blue	-13.2438	-39.7642	-26.9652	-21.0618	39.96	42.23	NoMB_Durian_1_20250411_165358	1744365238	97	Outdoor air, Durian
Blue	-27.1475	-74.3508	-61.2173	-47.3141	39.25	43.9	NoMB_Durian_1_20250411_170359	1744365839	97	Outdoor air, Durian
Blue	-42.7354	-113.191	-102.078	-48.9749	38.44	46.5	NoMB_Durian_1_20250411_171400	1744366440	97	Outdoor air, Durian
Blue	-48.003	-199.844	-186.837	-68.8774	37.23	52.88	NoMB_Durian_2_20250411_175620	1744368981	97	Outdoor air, Durian
Blue	-52.9164	-232.699	-224.449	-104.398	36.88	56.59	NoMB_Durian_2_20250411_180622	1744369582	97	Outdoor air, Durian
Blue	-48.9492	-225.202	-215.795	-92.8327	36.57	56.91	NoMB_Durian_2_20250411_181623	1744370184	97	Outdoor air, Durian
Blue	-37.4332	-174.345	-168.36	-92.7017	35.12	58.5	NoMB_Durian_3_20250411_185747	1744372667	97	Outdoor air, Durian
Blue	-42.451	-191.075	-185.173	-93.2252	35.16	58.3	NoMB_Durian_3_20250411_190748	1744373269	97	Outdoor air, Durian
Blue	-30.2033	-154.388	-147.273	-79.9067	34.94	57.73	NoMB_Durian_3_20250411_191750	1744373871	97	Outdoor air, Durian
Blue	-32.0402	-130.996	-123.892	-53.6036	34.16	57.24	NoMB_Durian_4_20250411_195701	1744376222	97	Outdoor air, Durian
Blue	-19.8714	-72.5584	-65.0082	-59.3167	34.51	53.62	NoMB_Durian_4_20250411_200704	1744376825	97	Outdoor air, Durian
Blue	-0.475184	-79.6664	-76.715	-33.3726	34.05	59.28	NoMB_Durian_4_20250411_201707	1744377427	97	Outdoor air, Durian
Blue	-21.7187	-103.203	-91.9983	-46.0282	34.19	54.55	NoMB_Durian_5_20250411_205711	1744379831	97	Outdoor air, Durian
Blue	-33.8188	-117.43	-104.49	-69.74	34.47	54.04	NoMB_Durian_5_20250411_210714	1744380434	97	Outdoor air, Durian
Blue	-6.99275	-68.8527	-56.4283	-39.3143	34.27	54.7	NoMB_Durian_5_20250411_211719	1744381040	97	Outdoor air, Durian
Blue	-12.4151	-38.3892	-24.5907	-20.5115	39.94	42.23	NoMB_Durian_1_20250411_165358	1744365238	98	Outdoor air, Durian
Blue	-25.9248	-75.5896	-61.4796	-46.3997	39.24	43.96	NoMB_Durian_1_20250411_170359	1744365839	98	Outdoor air, Durian
Blue	-41.5881	-112.341	-100.241	-48.3299	38.41	46.53	NoMB_Durian_1_20250411_171400	1744366440	98	Outdoor air, Durian
Blue	-46.8343	-192.291	-179.222	-67.8151	37.19	52.72	NoMB_Durian_2_20250411_175620	1744368981	98	Outdoor air, Durian
Blue	-55.0646	-237.451	-230.239	-105.549	36.9	56.69	NoMB_Durian_2_20250411_180622	1744369582	98	Outdoor air, Durian
Blue	-49.2367	-227.342	-218.969	-91.3737	36.57	57	NoMB_Durian_2_20250411_181623	1744370184	98	Outdoor air, Durian
Blue	-37.9238	-174.347	-168.401	-91.7526	35.1	58.6	NoMB_Durian_3_20250411_185747	1744372667	98	Outdoor air, Durian
Blue	-41.3684	-190.604	-184.772	-93.2067	35.12	58.48	NoMB_Durian_3_20250411_190748	1744373269	98	Outdoor air, Durian
Blue	-28.0363	-150.64	-143.565	-79.857	34.88	57.83	NoMB_Durian_3_20250411_191750	1744373871	98	Outdoor air, Durian
Blue	-31.8813	-131.711	-124.637	-55.8093	34.15	57.32	NoMB_Durian_4_20250411_195701	1744376222	98	Outdoor air, Durian
Blue	-18.8829	-68.9948	-62.4257	-59.4659	34.49	53.57	NoMB_Durian_4_20250411_200704	1744376825	98	Outdoor air, Durian
Blue	0.672161	-77.817	-73.878	-32.7275	34.02	59.31	NoMB_Durian_4_20250411_201707	1744377427	98	Outdoor air, Durian
Blue	-20.6672	-101.067	-89.8861	-44.5635	34.16	54.61	NoMB_Durian_5_20250411_205711	1744379831	98	Outdoor air, Durian
Blue	-32.6714	-114.581	-102.653	-69.095	34.44	54.07	NoMB_Durian_5_20250411_210714	1744380434	98	Outdoor air, Durian
Blue	-7.64224	-68.1406	-55.7242	-40.1594	34.26	54.72	NoMB_Durian_5_20250411_211719	1744381040	98	Outdoor air, Durian
Blue	-12.4789	-39.8646	-25.0738	-20.6317	39.94	42.25	NoMB_Durian_1_20250411_165358	1744365238	99	Outdoor air, Durian
Blue	-26.0206	-77.3028	-62.2043	-45.58	39.24	43.99	NoMB_Durian_1_20250411_170359	1744365839	99	Outdoor air, Durian
Blue	-40.8551	-110.679	-98.5916	-47.9599	38.39	46.56	NoMB_Durian_1_20250411_171400	1744366440	99	Outdoor air, Durian
Blue	-46.8016	-190.15	-177.027	-69.2487	37.2	52.58	NoMB_Durian_2_20250411_175620	1744368981	99	Outdoor air, Durian
Blue	-54.5552	-238.453	-230.281	-105.6	36.88	56.79	NoMB_Durian_2_20250411_180622	1744369582	99	Outdoor air, Durian
Blue	-48.6954	-228.106	-218.769	-88.3645	36.55	57.09	NoMB_Durian_2_20250411_181623	1744370184	99	Outdoor air, Durian
Blue	-38.4349	-179.151	-172.266	-92.7143	35.1	58.76	NoMB_Durian_3_20250411_185747	1744372667	99	Outdoor air, Durian
Blue	-40.9868	-192.557	-185.78	-93.4979	35.1	58.62	NoMB_Durian_3_20250411_190748	1744373269	99	Outdoor air, Durian
Blue	-29.0568	-155.441	-147.389	-79.7679	34.9	57.89	NoMB_Durian_3_20250411_191750	1744373871	99	Outdoor air, Durian
Blue	-33.2007	-134.088	-127.053	-56.4104	34.15	57.42	NoMB_Durian_4_20250411_195701	1744376222	99	Outdoor air, Durian
Blue	-19.6593	-68.3308	-60.7346	-59.0451	34.49	53.5	NoMB_Durian_4_20250411_200704	1744376825	99	Outdoor air, Durian
Blue	-0.47603	-82.5692	-78.6684	-33.8789	34.04	59.41	NoMB_Durian_4_20250411_201707	1744377427	99	Outdoor air, Durian
Blue	-20.9227	-102.968	-92.8188	-45.0444	34.16	54.69	NoMB_Durian_5_20250411_205711	1744379831	99	Outdoor air, Durian
Blue	-32.5126	-115.295	-103.399	-69.3007	34.43	54.15	NoMB_Durian_5_20250411_210714	1744380434	99	Outdoor air, Durian
Blue	-7.38756	-69.1417	-55.7449	-40.1848	34.25	54.77	NoMB_Durian_5_20250411_211719	1744381040	99	Outdoor air, Durian
Blue	-10.4709	-34.4025	-20.6208	-21.3763	39.89	42.27	NoMB_Durian_1_20250411_165358	1744365238	100	Outdoor air, Durian
Blue	-25.3835	-76.354	-63.2794	-45.3904	39.22	44.05	NoMB_Durian_1_20250411_170359	1744365839	100	Outdoor air, Durian
Blue	-39.2615	-107.405	-95.3258	-46.9796	38.35	46.58	NoMB_Durian_1_20250411_171400	1744366440	100	Outdoor air, Durian
Blue	-45.207	-184.973	-171.808	-70.7621	37.17	52.47	NoMB_Durian_2_20250411_175620	1744368981	100	Outdoor air, Durian
Blue	-53.8222	-236.791	-228.631	-105.23	36.86	56.82	NoMB_Durian_2_20250411_180622	1744369582	100	Outdoor air, Durian
Blue	-48.8232	-229.057	-219.735	-84.6049	36.55	57.13	NoMB_Durian_2_20250411_181623	1744370184	100	Outdoor air, Durian
Blue	-37.8935	-178.915	-172.066	-92.7051	35.08	58.85	NoMB_Durian_3_20250411_185747	1744372667	100	Outdoor air, Durian
Blue	-41.0196	-194.697	-187.975	-94.0644	35.09	58.76	NoMB_Durian_3_20250411_190748	1744373269	100	Outdoor air, Durian
Blue	-29.0887	-155.679	-147.631	-79.828	34.9	57.9	NoMB_Durian_3_20250411_191750	1744373871	100	Outdoor air, Durian
Blue	-31.2885	-129.339	-122.325	-57.3353	34.1	57.47	NoMB_Durian_4_20250411_195701	1744376222	100	Outdoor air, Durian
Blue	-19.4676	-66.9045	-59.285	-58.6845	34.49	53.44	NoMB_Durian_4_20250411_200704	1744376825	100	Outdoor air, Durian
Blue	1.40427	-78.0579	-74.1817	-32.8639	33.99	59.47	NoMB_Durian_4_20250411_201707	1744377427	100	Outdoor air, Durian
Blue	-19.8073	-101.357	-89.2234	-44.4594	34.13	54.73	NoMB_Durian_5_20250411_205711	1744379831	100	Outdoor air, Durian
Blue	-32.6723	-116.483	-104.607	-69.6013	34.43	54.2	NoMB_Durian_5_20250411_210714	1744380434	100	Outdoor air, Durian
Blue	-6.08051	-66.1037	-51.7	-38.2392	34.22	54.75	NoMB_Durian_5_20250411_211719	1744381040	100	Outdoor air, Durian
Red	-29.7108	-61.6467	-46.2784	-43.4237	37.72	43.55	MB_Durian_1_20250411_173651	1744367811	71	Outdoor air, Durian, Mealybug
Red	-48.7894	-111.08	-96.5405	-68.1127	37.62	45.29	MB_Durian_1_20250411_174652	1744368412	71	Outdoor air, Durian, Mealybug
Red	-51.6264	-201.259	-198.055	-23.3606	36.58	56.22	MB_Durian_2_20250411_182542	1744370743	71	Outdoor air, Durian, Mealybug
Red	-50.4672	-255.521	-253.197	-21.0922	35.85	61.74	MB_Durian_2_20250411_183543	1744371344	71	Outdoor air, Durian, Mealybug
Red	-53.1288	-224.945	-221.934	-82.6537	35.59	60.33	MB_Durian_2_20250411_184545	1744371945	71	Outdoor air, Durian, Mealybug
Red	-45.3939	-171.593	-168.108	-87.0466	35.53	56.26	MB_Durian_3_20250411_192902	1744374543	71	Outdoor air, Durian, Mealybug
Red	-11.9879	-100.321	-95.9769	-39.5011	34.88	59.5	MB_Durian_3_20250411_193904	1744375145	71	Outdoor air, Durian, Mealybug
Red	-39.3057	-168.414	-165.604	-70.4456	34.63	58.84	MB_Durian_3_20250411_194907	1744375747	71	Outdoor air, Durian, Mealybug
Red	-27.1692	-113.187	-109.684	-56.0491	34.68	54.91	MB_Durian_4_20250411_202919	1744378160	71	Outdoor air, Durian, Mealybug
Red	11.5454	5.83978	13.9466	-7.15098	34.27	53.04	MB_Durian_4_20250411_203922	1744378762	71	Outdoor air, Durian, Mealybug
Red	-27.427	-75.9578	-66.6973	-43.9784	34.63	51.91	MB_Durian_4_20250411_204925	1744379365	71	Outdoor air, Durian, Mealybug
Red	3.80313	-21.7527	-11.1908	-21.0902	34.81	52.88	MB_Durian_5_20250411_213042	1744381843	71	Outdoor air, Durian, Mealybug
Red	10.9892	3.55666	12.5151	-10.3346	34.39	53.12	MB_Durian_5_20250411_214046	1744382447	71	Outdoor air, Durian, Mealybug
Red	-10.9787	-45.1162	-37.7909	-33.6689	34.36	52.87	MB_Durian_5_20250411_215050	1744383050	71	Outdoor air, Durian, Mealybug
Red	-34.9186	-93.2259	-79.8429	-58.4041	38.23	46.5	MB_Durian_1_20250411_172650	1744367210	72	Outdoor air, Durian, Mealybug
Red	-27.9575	-57.1835	-40.8046	-43.1429	37.68	43.52	MB_Durian_1_20250411_173651	1744367811	72	Outdoor air, Durian, Mealybug
Red	-46.6855	-104.905	-90.3626	-65.6769	37.57	45.28	MB_Durian_1_20250411_174652	1744368412	72	Outdoor air, Durian, Mealybug
Red	-50.3193	-198.221	-194.01	-27.415	36.55	56.2	MB_Durian_2_20250411_182542	1744370743	72	Outdoor air, Durian, Mealybug
Red	-50.3075	-255.332	-251.989	-28.7916	35.85	61.69	MB_Durian_2_20250411_183543	1744371344	72	Outdoor air, Durian, Mealybug
Red	-52.4588	-222.856	-219.814	-77.8977	35.58	60.25	MB_Durian_2_20250411_184545	1744371945	72	Outdoor air, Durian, Mealybug
Red	-44.7257	-172.31	-169.895	-87.3032	35.5	56.44	MB_Durian_3_20250411_192902	1744374543	72	Outdoor air, Durian, Mealybug
Red	-12.0526	-102.699	-97.4135	-40.1276	34.87	59.65	MB_Durian_3_20250411_193904	1744375145	72	Outdoor air, Durian, Mealybug
Red	-39.3376	-168.651	-166.846	-70.5057	34.63	58.85	MB_Durian_3_20250411_194907	1744375747	72	Outdoor air, Durian, Mealybug
Red	-26.7983	-109.674	-105.156	-54.9832	34.65	54.87	MB_Durian_4_20250411_202919	1744378160	72	Outdoor air, Durian, Mealybug
Red	11.8959	6.55186	14.6506	-6.99606	34.26	53.06	MB_Durian_4_20250411_203922	1744378762	72	Outdoor air, Durian, Mealybug
Red	-27.4909	-76.4333	-67.1805	-44.0986	34.63	51.93	MB_Durian_4_20250411_204925	1744379365	72	Outdoor air, Durian, Mealybug
Red	5.42874	-18.2404	-6.68336	-20.0498	34.77	52.89	MB_Durian_5_20250411_213042	1744381843	72	Outdoor air, Durian, Mealybug
Red	11.0211	2.79437	12.7567	-11.2745	34.39	53.11	MB_Durian_5_20250411_214046	1744382447	72	Outdoor air, Durian, Mealybug
Red	-10.6601	-45.6419	-37.3284	-33.5741	34.35	52.9	MB_Durian_5_20250411_215050	1744383050	72	Outdoor air, Durian, Mealybug
Red	-34.1217	-91.0886	-77.71	-57.9139	38.21	46.51	MB_Durian_1_20250411_172650	1744367210	73	Outdoor air, Durian, Mealybug
Red	-27.1287	-54.8085	-39.4301	-43.5926	37.66	43.52	MB_Durian_1_20250411_173651	1744367811	73	Outdoor air, Durian, Mealybug
Red	-47.9926	-109.943	-95.4075	-66.6226	37.6	45.3	MB_Durian_1_20250411_174652	1744368412	73	Outdoor air, Durian, Mealybug
Red	-51.0966	-198.46	-194.272	-27.5005	36.54	56.26	MB_Durian_2_20250411_182542	1744370743	73	Outdoor air, Durian, Mealybug
Red	-51.3395	-256.57	-252.231	-36.8517	35.85	61.7	MB_Durian_2_20250411_183543	1744371344	73	Outdoor air, Durian, Mealybug
Red	-51.9601	-217.392	-214.319	-73.5914	35.55	60.17	MB_Durian_2_20250411_184545	1744371945	73	Outdoor air, Durian, Mealybug
Red	-45.1409	-176.4	-173.035	-88.0846	35.5	56.57	MB_Durian_3_20250411_192902	1744374543	73	Outdoor air, Durian, Mealybug
Red	-10.5236	-100.802	-96.5843	-40.7738	34.82	59.82	MB_Durian_3_20250411_193904	1744375145	73	Outdoor air, Durian, Mealybug
Red	-37.106	-162.525	-159.702	-68.8295	34.58	58.8	MB_Durian_3_20250411_194907	1744375747	73	Outdoor air, Durian, Mealybug
Red	-25.8941	-110.387	-106.881	-55.1636	34.65	54.9	MB_Durian_4_20250411_202919	1744378160	73	Outdoor air, Durian, Mealybug
Red	13.1906	12.2506	20.3246	-5.70592	34.2	53.12	MB_Durian_4_20250411_203922	1744378762	73	Outdoor air, Durian, Mealybug
Red	-25.419	-71.4957	-62.2442	-43.723	34.58	51.93	MB_Durian_4_20250411_204925	1744379365	73	Outdoor air, Durian, Mealybug
Red	6.1617	-16.5785	-5.03362	-19.6798	34.75	52.92	MB_Durian_5_20250411_213042	1744381843	73	Outdoor air, Durian, Mealybug
Red	12.9662	9.68386	19.6801	-8.63299	34.35	53.02	MB_Durian_5_20250411_214046	1744382447	73	Outdoor air, Durian, Mealybug
Red	-10.9156	-47.5436	-39.2611	-34.055	34.35	52.98	MB_Durian_5_20250411_215050	1744383050	73	Outdoor air, Durian, Mealybug
Red	-32.5919	-89.2894	-74.9273	-57.0538	38.17	46.55	MB_Durian_1_20250411_172650	1744367210	74	Outdoor air, Durian, Mealybug
Red	-27.8421	-56.5719	-39.2092	-44.5579	37.65	43.56	MB_Durian_1_20250411_173651	1744367811	74	Outdoor air, Durian, Mealybug
Red	-48.3555	-109.994	-94.4826	-66.4329	37.58	45.36	MB_Durian_1_20250411_174652	1744368412	74	Outdoor air, Durian, Mealybug
Red	-50.2678	-197.085	-192.898	-26.9502	36.52	56.26	MB_Durian_2_20250411_182542	1744370743	74	Outdoor air, Durian, Mealybug
Red	-50.8612	-254.907	-251.56	-43.4564	35.84	61.68	MB_Durian_2_20250411_183543	1744371344	74	Outdoor air, Durian, Mealybug
Red	-50.2583	-215.065	-210.958	-71.7753	35.54	60.08	MB_Durian_2_20250411_184545	1744371945	74	Outdoor air, Durian, Mealybug
Red	-43.9625	-176.216	-171.91	-88.8857	35.46	56.72	MB_Durian_3_20250411_192902	1744374543	74	Outdoor air, Durian, Mealybug
Red	-12.3098	-108.406	-104.253	-41.6211	34.85	59.99	MB_Durian_3_20250411_193904	1744375145	74	Outdoor air, Durian, Mealybug
Red	-36.5958	-160.624	-157.79	-68.3741	34.57	58.77	MB_Durian_3_20250411_194907	1744375747	74	Outdoor air, Durian, Mealybug
Red	-25.8737	-106.586	-103.056	-54.2526	34.63	54.84	MB_Durian_4_20250411_202919	1744378160	74	Outdoor air, Durian, Mealybug
Red	11.8197	7.73725	15.7965	-6.77176	34.23	53.16	MB_Durian_4_20250411_203922	1744378762	74	Outdoor air, Durian, Mealybug
Red	-26.4074	-75.0593	-65.8267	-44.5738	34.6	51.98	MB_Durian_4_20250411_204925	1744379365	74	Outdoor air, Durian, Mealybug
Red	7.4679	-15.4433	-2.9421	-19.2405	34.71	53.03	MB_Durian_5_20250411_213042	1744381843	74	Outdoor air, Durian, Mealybug
Red	13.8908	12.772	22.7793	-7.9024	34.33	52.99	MB_Durian_5_20250411_214046	1744382447	74	Outdoor air, Durian, Mealybug
Red	-10.2466	-46.3571	-39.0946	-33.8053	34.33	53.03	MB_Durian_5_20250411_215050	1744383050	74	Outdoor air, Durian, Mealybug
Red	-33.7401	-94.0416	-79.7178	-58.2052	38.19	46.65	MB_Durian_1_20250411_172650	1744367210	75	Outdoor air, Durian, Mealybug
Red	-27.2999	-54.4335	-38.0556	-46.0423	37.64	43.52	MB_Durian_1_20250411_173651	1744367811	75	Outdoor air, Durian, Mealybug
Red	-47.2401	-108.383	-92.8872	-65.848	37.55	45.4	MB_Durian_1_20250411_174652	1744368412	75	Outdoor air, Durian, Mealybug
Red	-49.3121	-196.662	-192.51	-27.6658	36.49	56.35	MB_Durian_2_20250411_182542	1744370743	75	Outdoor air, Durian, Mealybug
Red	-49.1078	-249.444	-246.087	-49.1755	35.8	61.65	MB_Durian_2_20250411_183543	1744371344	75	Outdoor air, Durian, Mealybug
Red	-50.2902	-215.303	-212.199	-71.8354	35.54	60.09	MB_Durian_2_20250411_184545	1744371945	75	Outdoor air, Durian, Mealybug
Red	-43.6128	-177.406	-173.16	-89.2371	35.44	56.87	MB_Durian_3_20250411_192902	1744374543	75	Outdoor air, Durian, Mealybug
Red	-9.8882	-103.659	-99.5662	-40.5968	34.78	60.14	MB_Durian_3_20250411_193904	1744375145	75	Outdoor air, Durian, Mealybug
Red	-36.4361	-159.436	-156.582	-68.0735	34.57	58.72	MB_Durian_3_20250411_194907	1744375747	75	Outdoor air, Durian, Mealybug
Red	-24.6944	-104.499	-99.9779	-53.5475	34.6	54.86	MB_Durian_4_20250411_202919	1744378160	75	Outdoor air, Durian, Mealybug
Red	12.8392	8.63578	17.6671	-6.36714	34.2	53.23	MB_Durian_4_20250411_203922	1744378762	75	Outdoor air, Durian, Mealybug
Red	-23.953	-68.1719	-58.9448	-42.9831	34.54	51.99	MB_Durian_4_20250411_204925	1744379365	75	Outdoor air, Durian, Mealybug
Red	7.81841	-14.7312	-2.23803	-19.0856	34.7	53.05	MB_Durian_5_20250411_213042	1744381843	75	Outdoor air, Durian, Mealybug
Red	13.763	10.8212	21.813	-9.14284	34.33	53.03	MB_Durian_5_20250411_214046	1744382447	75	Outdoor air, Durian, Mealybug
Red	-9.95995	-46.1205	-37.8737	-33.7706	34.32	53.07	MB_Durian_5_20250411_215050	1744383050	75	Outdoor air, Durian, Mealybug
Red	-33.7082	-94.8038	-79.4762	-58.1451	38.19	46.64	MB_Durian_1_20250411_172650	1744367210	76	Outdoor air, Durian, Mealybug
Red	-25.9298	-52.8229	-35.4809	-45.4828	37.6	43.61	MB_Durian_1_20250411_173651	1744367811	76	Outdoor air, Durian, Mealybug
Red	-48.1008	-111.995	-96.5033	-68.4584	37.57	45.41	MB_Durian_1_20250411_174652	1744368412	76	Outdoor air, Durian, Mealybug
Red	-49.4079	-197.375	-193.235	-27.8461	36.49	56.38	MB_Durian_2_20250411_182542	1744370743	76	Outdoor air, Durian, Mealybug
Red	-48.1202	-247.783	-244.457	-54.831	35.77	61.73	MB_Durian_2_20250411_183543	1744371344	76	Outdoor air, Durian, Mealybug
Red	-50.9078	-214.353	-211.254	-70.6204	35.53	60.1	MB_Durian_2_20250411_184545	1744371945	76	Outdoor air, Durian, Mealybug
Red	-42.753	-176.696	-172.497	-89.1331	35.41	56.99	MB_Durian_3_20250411_192902	1744374543	76	Outdoor air, Durian, Mealybug
Red	-11.2919	-111.313	-106.289	-42.2291	34.8	60.32	MB_Durian_3_20250411_193904	1744375145	76	Outdoor air, Durian, Mealybug
Red	-34.9693	-154.209	-151.329	-67.8273	34.54	58.65	MB_Durian_3_20250411_194907	1744375747	76	Outdoor air, Durian, Mealybug
Red	-23.9934	-103.074	-98.5697	-53.2376	34.58	54.9	MB_Durian_4_20250411_202919	1744378160	76	Outdoor air, Durian, Mealybug
Red	14.1135	10.5333	19.517	-5.98793	34.16	53.35	MB_Durian_4_20250411_203922	1744378762	76	Outdoor air, Durian, Mealybug
Red	-26.0054	-72.211	-63.0104	-43.9541	34.56	52.06	MB_Durian_4_20250411_204925	1744379365	76	Outdoor air, Durian, Mealybug
Red	8.4236	-14.0202	-1.55466	-18.9561	34.68	53.12	MB_Durian_5_20250411_213042	1744381843	76	Outdoor air, Durian, Mealybug
Red	14.5598	12.9585	22.9459	-8.65268	34.31	53.04	MB_Durian_5_20250411_214046	1744382447	76	Outdoor air, Durian, Mealybug
Red	-9.76915	-46.597	-38.3776	-33.9162	34.31	53.14	MB_Durian_5_20250411_215050	1744383050	76	Outdoor air, Durian, Mealybug
Red	-33.0391	-93.6174	-80.3096	-59.8954	38.17	46.69	MB_Durian_1_20250411_172650	1744367210	77	Outdoor air, Durian, Mealybug
Red	-26.3762	-55.2481	-36.9098	-45.818	37.61	43.62	MB_Durian_1_20250411_173651	1744367811	77	Outdoor air, Durian, Mealybug
Red	-46.6349	-108.672	-93.2038	-68.7185	37.53	45.47	MB_Durian_1_20250411_174652	1744368412	77	Outdoor air, Durian, Mealybug
Red	-49.2171	-198.851	-193.739	-26.9918	36.48	56.45	MB_Durian_2_20250411_182542	1744370743	77	Outdoor air, Durian, Mealybug
Red	-49.5985	-250.446	-246.128	-58.2263	35.78	61.75	MB_Durian_2_20250411_183543	1744371344	77	Outdoor air, Durian, Mealybug
Red	-49.9201	-213.692	-209.625	-69.2759	35.5	60.18	MB_Durian_2_20250411_184545	1744371945	77	Outdoor air, Durian, Mealybug
Red	-44.8692	-182.211	-177.046	-90.2243	35.43	57.08	MB_Durian_3_20250411_192902	1744374543	77	Outdoor air, Durian, Mealybug
Red	-10.7506	-111.077	-106.089	-43.2198	34.78	60.41	MB_Durian_3_20250411_193904	1744375145	77	Outdoor air, Durian, Mealybug
Red	-36.5745	-155.92	-153.012	-67.9568	34.56	58.58	MB_Durian_3_20250411_194907	1744375747	77	Outdoor air, Durian, Mealybug
Red	-23.7706	-104.313	-99.832	-53.3232	34.57	54.96	MB_Durian_4_20250411_202919	1744378160	77	Outdoor air, Durian, Mealybug
Red	14.1446	8.86819	17.8052	-6.43411	34.15	53.47	MB_Durian_4_20250411_203922	1744378762	77	Outdoor air, Durian, Mealybug
Red	-24.8581	-69.3616	-60.1734	-44.3091	34.53	52.09	MB_Durian_4_20250411_204925	1744379365	77	Outdoor air, Durian, Mealybug
Red	8.20001	-16.6842	-4.24579	-19.3769	34.68	53.19	MB_Durian_5_20250411_213042	1744381843	77	Outdoor air, Durian, Mealybug
Red	14.2404	10.5813	20.53	-9.25378	34.31	53.14	MB_Durian_5_20250411_214046	1744382447	77	Outdoor air, Durian, Mealybug
Red	-8.30324	-43.2732	-36.0781	-33.1763	34.27	53.2	MB_Durian_5_20250411_215050	1744383050	77	Outdoor air, Durian, Mealybug
Red	-30.2662	-87.2557	-72.9652	-58.2099	38.1	46.73	MB_Durian_1_20250411_172650	1744367210	78	Outdoor air, Durian, Mealybug
Red	-25.0061	-52.6375	-35.3351	-46.2585	37.57	43.71	MB_Durian_1_20250411_173651	1744367811	78	Outdoor air, Durian, Mealybug
Red	-46.6668	-110.909	-93.4454	-68.7786	37.53	45.48	MB_Durian_1_20250411_174652	1744368412	78	Outdoor air, Durian, Mealybug
Red	-49.4407	-200.515	-195.43	-27.4126	36.48	56.52	MB_Durian_2_20250411_182542	1744370743	78	Outdoor air, Durian, Mealybug
Red	-48.4192	-247.359	-244.049	-62.5212	35.75	61.77	MB_Durian_2_20250411_183543	1744371344	78	Outdoor air, Durian, Mealybug
Red	-48.9644	-213.269	-208.237	-65.9915	35.47	60.27	MB_Durian_2_20250411_184545	1744371945	78	Outdoor air, Durian, Mealybug
Red	-42.6065	-177.75	-172.613	-88.9943	35.37	57.15	MB_Durian_3_20250411_192902	1744374543	78	Outdoor air, Durian, Mealybug
Red	-9.89074	-110.368	-105.426	-42.1157	34.75	60.53	MB_Durian_3_20250411_193904	1744375145	78	Outdoor air, Durian, Mealybug
Red	-34.0873	-146.893	-143.935	-65.7997	34.51	58.45	MB_Durian_3_20250411_194907	1744375747	78	Outdoor air, Durian, Mealybug
Red	-23.8354	-106.691	-102.269	-53.9497	34.56	55.11	MB_Durian_4_20250411_202919	1744378160	78	Outdoor air, Durian, Mealybug
Red	14.0168	7.91733	15.8389	-6.67455	34.15	53.51	MB_Durian_4_20250411_203922	1744378762	78	Outdoor air, Durian, Mealybug
Red	-23.7427	-66.7499	-57.578	-43.7241	34.5	52.13	MB_Durian_4_20250411_204925	1744379365	78	Outdoor air, Durian, Mealybug
Red	8.42275	-16.923	-4.50807	-19.4624	34.67	53.25	MB_Durian_5_20250411_213042	1744381843	78	Outdoor air, Durian, Mealybug
Red	14.7383	14.1428	24.071	-8.4538	34.27	53.19	MB_Durian_5_20250411_214046	1744382447	78	Outdoor air, Durian, Mealybug
Red	-8.14438	-44.9874	-36.8236	-33.3821	34.26	53.28	MB_Durian_5_20250411_215050	1744383050	78	Outdoor air, Durian, Mealybug
Red	-31.0311	-89.1553	-74.8565	-58.6399	38.12	46.71	MB_Durian_1_20250411_172650	1744367210	79	Outdoor air, Durian, Mealybug
Red	-25.4843	-55.3004	-37.0055	-46.6539	37.58	43.73	MB_Durian_1_20250411_173651	1744367811	79	Outdoor air, Durian, Mealybug
Red	-45.169	-107.348	-90.9043	-68.9786	37.49	45.53	MB_Durian_1_20250411_174652	1744368412	79	Outdoor air, Durian, Mealybug
Red	-49.0067	-198.429	-192.372	-26.7328	36.44	56.59	MB_Durian_2_20250411_182542	1744370743	79	Outdoor air, Durian, Mealybug
Red	-48.0367	-247.409	-243.104	-65.3061	35.74	61.78	MB_Durian_2_20250411_183543	1744371344	79	Outdoor air, Durian, Mealybug
Red	-49.0922	-214.22	-210.203	-62.2319	35.47	60.31	MB_Durian_2_20250411_184545	1744371945	79	Outdoor air, Durian, Mealybug
Red	-42.7023	-178.463	-173.338	-89.1746	35.37	57.18	MB_Durian_3_20250411_192902	1744374543	79	Outdoor air, Durian, Mealybug
Red	-9.668	-110.606	-105.689	-42.2012	34.74	60.59	MB_Durian_3_20250411_193904	1744375145	79	Outdoor air, Durian, Mealybug
Red	-33.8957	-145.466	-142.486	-65.4391	34.51	58.39	MB_Durian_3_20250411_194907	1744375747	79	Outdoor air, Durian, Mealybug
Red	-23.4538	-107.644	-103.276	-54.241	34.54	55.25	MB_Durian_4_20250411_202919	1744378160	79	Outdoor air, Durian, Mealybug
Red	15.2919	11.7176	19.6422	-5.78905	34.12	53.5	MB_Durian_4_20250411_203922	1744378762	79	Outdoor air, Durian, Mealybug
Red	-25.6238	-74.164	-64.0181	-45.2454	34.54	52.2	MB_Durian_4_20250411_204925	1744379365	79	Outdoor air, Durian, Mealybug
Red	10.9091	-9.7979	2.61544	-17.8116	34.61	53.25	MB_Durian_5_20250411_213042	1744381843	79	Outdoor air, Durian, Mealybug
Red	15.4073	14.3293	25.2376	-8.20409	34.25	53.24	MB_Durian_5_20250411_214046	1744382447	79	Outdoor air, Durian, Mealybug
Red	-7.88969	-44.9885	-36.8443	-33.4075	34.25	53.33	MB_Durian_5_20250411_215050	1744383050	79	Outdoor air, Durian, Mealybug
Red	-29.6921	-85.8796	-70.57	-57.6342	38.09	46.68	MB_Durian_1_20250411_172650	1744367210	80	Outdoor air, Durian, Mealybug
Red	-25.2935	-56.7769	-38.5094	-45.7995	37.57	43.8	MB_Durian_1_20250411_173651	1744367811	80	Outdoor air, Durian, Mealybug
Red	-44.9462	-107.587	-91.1666	-69.0642	37.48	45.59	MB_Durian_1_20250411_174652	1744368412	80	Outdoor air, Durian, Mealybug
Red	-49.2942	-200.569	-195.546	-24.2738	36.44	56.68	MB_Durian_2_20250411_182542	1744370743	80	Outdoor air, Durian, Mealybug
Red	-46.9533	-245.035	-240.75	-67.7813	35.71	61.83	MB_Durian_2_20250411_183543	1744371344	80	Outdoor air, Durian, Mealybug
Red	-48.8056	-213.983	-209.983	-60.1972	35.46	60.35	MB_Durian_2_20250411_184545	1744371945	80	Outdoor air, Durian, Mealybug
Red	-41.7466	-177.04	-171.951	-88.8902	35.34	57.27	MB_Durian_3_20250411_192902	1744374543	80	Outdoor air, Durian, Mealybug
Red	-8.52065	-108.757	-102.852	-41.5562	34.71	60.62	MB_Durian_3_20250411_193904	1744375145	80	Outdoor air, Durian, Mealybug
Red	-32.1423	-141.003	-137.012	-64.1582	34.47	58.36	MB_Durian_3_20250411_194907	1744375747	80	Outdoor air, Durian, Mealybug
Red	-22.7536	-108.123	-103.822	-54.4374	34.51	55.42	MB_Durian_4_20250411_202919	1744378160	80	Outdoor air, Durian, Mealybug
Red	15.0045	8.57815	17.4679	-6.33004	34.12	53.59	MB_Durian_4_20250411_203922	1744378762	80	Outdoor air, Durian, Mealybug
Red	-23.7116	-69.415	-60.2898	-44.1703	34.49	52.25	MB_Durian_4_20250411_204925	1744379365	80	Outdoor air, Durian, Mealybug
Red	9.82478	-15.0747	-2.69178	-18.8428	34.63	53.33	MB_Durian_5_20250411_213042	1744381843	80	Outdoor air, Durian, Mealybug
Red	16.1403	15.9911	26.8873	-7.83415	34.23	53.27	MB_Durian_5_20250411_214046	1744382447	80	Outdoor air, Durian, Mealybug
Red	-6.80623	-42.6145	-34.4905	-32.8826	34.22	53.38	MB_Durian_5_20250411_215050	1744383050	80	Outdoor air, Durian, Mealybug
Red	-28.5447	-84.0302	-68.733	-55.9891	38.06	46.71	MB_Durian_1_20250411_172650	1744367210	81	Outdoor air, Durian, Mealybug
Red	-24.1781	-54.1652	-35.914	-45.2145	37.54	43.84	MB_Durian_1_20250411_173651	1744367811	81	Outdoor air, Durian, Mealybug
Red	-43.8308	-105.975	-88.5712	-68.4792	37.45	45.63	MB_Durian_1_20250411_174652	1744368412	81	Outdoor air, Durian, Mealybug
Red	-48.626	-201.285	-196.333	-24.5304	36.41	56.86	MB_Durian_2_20250411_182542	1744370743	81	Outdoor air, Durian, Mealybug
Red	-46.6347	-244.561	-240.287	-70.6865	35.7	61.86	MB_Durian_2_20250411_183543	1744371344	81	Outdoor air, Durian, Mealybug
Red	-47.9449	-212.37	-207.366	-57.5868	35.44	60.34	MB_Durian_2_20250411_184545	1744371945	81	Outdoor air, Durian, Mealybug
Red	-42.7031	-180.366	-176.292	-89.6809	35.36	57.31	MB_Durian_3_20250411_192902	1744374543	81	Outdoor air, Durian, Mealybug
Red	-8.04238	-107.094	-101.181	-41.1608	34.7	60.6	MB_Durian_3_20250411_193904	1744375145	81	Outdoor air, Durian, Mealybug
Red	-31.5363	-139.389	-135.375	-63.5224	34.46	58.3	MB_Durian_3_20250411_194907	1744375747	81	Outdoor air, Durian, Mealybug
Red	-22.4359	-109.551	-105.313	-55.8489	34.49	55.58	MB_Durian_4_20250411_202919	1744378160	81	Outdoor air, Durian, Mealybug
Red	14.6212	5.72557	14.5688	-7.05136	34.12	53.71	MB_Durian_4_20250411_203922	1744378762	81	Outdoor air, Durian, Mealybug
Red	-22.9786	-67.7531	-58.6401	-43.8003	34.47	52.28	MB_Durian_4_20250411_204925	1744379365	81	Outdoor air, Durian, Mealybug
Red	10.9402	-12.463	-0.0963872	-18.2578	34.6	53.37	MB_Durian_5_20250411_213042	1744381843	81	Outdoor air, Durian, Mealybug
Red	15.9486	14.5649	25.4378	-8.19481	34.23	53.33	MB_Durian_5_20250411_214046	1744382447	81	Outdoor air, Durian, Mealybug
Red	-5.75471	-40.4783	-32.3782	-32.4179	34.19	53.44	MB_Durian_5_20250411_215050	1744383050	81	Outdoor air, Durian, Mealybug
Red	-28.2261	-83.5558	-68.2705	-55.8943	38.05	46.74	MB_Durian_1_20250411_172650	1744367210	82	Outdoor air, Durian, Mealybug
Red	-23.9873	-56.6417	-36.4179	-43.3602	37.53	43.91	MB_Durian_1_20250411_173651	1744367811	82	Outdoor air, Durian, Mealybug
Red	-43.6081	-107.214	-89.8335	-66.5647	37.44	45.69	MB_Durian_1_20250411_174652	1744368412	82	Outdoor air, Durian, Mealybug
Red	-49.0412	-205.376	-200.474	-25.3118	36.41	56.99	MB_Durian_2_20250411_182542	1744370743	82	Outdoor air, Durian, Mealybug
Red	-46.7944	-245.749	-241.495	-72.987	35.7	61.91	MB_Durian_2_20250411_183543	1744371344	82	Outdoor air, Durian, Mealybug
Red	-47.5305	-211.183	-207.179	-57.3117	35.43	60.34	MB_Durian_2_20250411_184545	1744371945	82	Outdoor air, Durian, Mealybug
Red	-40.2487	-174.478	-169.41	-88.0902	35.3	57.32	MB_Durian_3_20250411_192902	1744374543	82	Outdoor air, Durian, Mealybug
Red	-7.94656	-106.381	-101.457	-40.9805	34.7	60.57	MB_Durian_3_20250411_193904	1744375145	82	Outdoor air, Durian, Mealybug
Red	-30.1973	-135.114	-131.089	-62.5167	34.43	58.27	MB_Durian_3_20250411_194907	1744375747	82	Outdoor air, Durian, Mealybug
Red	-22.7872	-113.166	-107.97	-56.5101	34.49	55.69	MB_Durian_4_20250411_202919	1744378160	82	Outdoor air, Durian, Mealybug
Red	17.0117	12.1375	20.9676	-4.58089	34.06	53.74	MB_Durian_4_20250411_203922	1744378762	82	Outdoor air, Durian, Mealybug
Red	-22.9156	-70.1804	-60.1103	-45.1864	34.46	52.39	MB_Durian_4_20250411_204925	1744379365	82	Outdoor air, Durian, Mealybug
Red	12.1514	-9.13815	3.22378	-17.4925	34.57	53.38	MB_Durian_5_20250411_213042	1744381843	82	Outdoor air, Durian, Mealybug
Red	17.4465	18.1263	28.9789	-7.39483	34.19	53.38	MB_Durian_5_20250411_214046	1744382447	82	Outdoor air, Durian, Mealybug
Red	-6.23298	-43.1412	-34.0487	-32.8133	34.2	53.46	MB_Durian_5_20250411_215050	1744383050	82	Outdoor air, Durian, Mealybug
Red	-29.0026	-82.8918	-67.5794	-55.4736	38.05	46.67	MB_Durian_1_20250411_172650	1744367210	83	Outdoor air, Durian, Mealybug
Red	-23.3183	-55.4553	-36.2513	-43.1105	37.51	43.96	MB_Durian_1_20250411_173651	1744367811	83	Outdoor air, Durian, Mealybug
Red	-43.0348	-106.74	-89.3917	-66.4953	37.42	45.77	MB_Durian_1_20250411_174652	1744368412	83	Outdoor air, Durian, Mealybug
Red	-47.5442	-203.717	-198.886	-26.0181	36.36	57.17	MB_Durian_2_20250411_182542	1744370743	83	Outdoor air, Durian, Mealybug
Red	-48.018	-248.413	-244.186	-75.4078	35.7	61.98	MB_Durian_2_20250411_183543	1744371344	83	Outdoor air, Durian, Mealybug
Red	-46.5428	-210.522	-205.55	-55.9672	35.4	60.42	MB_Durian_2_20250411_184545	1744371945	83	Outdoor air, Durian, Mealybug
Red	-40.2807	-174.716	-169.651	-88.1503	35.3	57.33	MB_Durian_3_20250411_192902	1744374543	83	Outdoor air, Durian, Mealybug
Red	-6.67145	-102.581	-96.6532	-40.095	34.67	60.56	MB_Durian_3_20250411_193904	1744375145	83	Outdoor air, Durian, Mealybug
Red	-30.1334	-134.638	-130.605	-63.3965	34.43	58.25	MB_Durian_3_20250411_194907	1744375747	83	Outdoor air, Durian, Mealybug
Red	-21.9912	-112.932	-107.791	-56.5263	34.46	55.83	MB_Durian_4_20250411_202919	1744378160	83	Outdoor air, Durian, Mealybug
Red	17.2025	11.661	20.4637	-4.72653	34.05	53.81	MB_Durian_4_20250411_203922	1744378762	83	Outdoor air, Durian, Mealybug
Red	-22.1826	-68.5186	-58.4606	-44.8165	34.44	52.42	MB_Durian_4_20250411_204925	1744379365	83	Outdoor air, Durian, Mealybug
Red	11.6616	-7.23749	5.1358	-17.037	34.56	53.35	MB_Durian_5_20250411_213042	1744381843	83	Outdoor air, Durian, Mealybug
Red	17.191	16.2246	27.0461	-7.87571	34.19	53.46	MB_Durian_5_20250411_214046	1744382447	83	Outdoor air, Durian, Mealybug
Red	-5.18146	-41.0049	-31.9365	-32.3485	34.17	53.52	MB_Durian_5_20250411_215050	1744383050	83	Outdoor air, Durian, Mealybug
Red	-29.0664	-84.3672	-68.0626	-55.5938	38.05	46.69	MB_Durian_1_20250411_172650	1744367210	84	Outdoor air, Durian, Mealybug
Red	-23.1905	-55.5044	-36.285	-42.87	37.51	43.92	MB_Durian_1_20250411_173651	1744367811	84	Outdoor air, Durian, Mealybug
Red	-43.0668	-107.978	-89.6333	-63.5554	37.42	45.78	MB_Durian_1_20250411_174652	1744368412	84	Outdoor air, Durian, Mealybug
Red	-48.4697	-209.708	-203.939	-30.255	36.37	57.33	MB_Durian_2_20250411_182542	1744370743	84	Outdoor air, Durian, Mealybug
Red	-46.1696	-244.14	-239.941	-75.4529	35.65	62.05	MB_Durian_2_20250411_183543	1744371344	84	Outdoor air, Durian, Mealybug
Red	-46.1923	-209.81	-204.846	-54.8123	35.39	60.44	MB_Durian_2_20250411_184545	1744371945	84	Outdoor air, Durian, Mealybug
Red	-39.9621	-174.242	-169.189	-88.0555	35.29	57.36	MB_Durian_3_20250411_192902	1744374543	84	Outdoor air, Durian, Mealybug
Red	-5.10971	-98.5437	-93.6289	-39.1748	34.63	60.59	MB_Durian_3_20250411_193904	1744375145	84	Outdoor air, Durian, Mealybug
Red	-29.4004	-132.976	-128.956	-63.0265	34.41	58.28	MB_Durian_3_20250411_194907	1744375747	84	Outdoor air, Durian, Mealybug
Red	-21.0986	-110.081	-105.933	-55.8558	34.44	55.81	MB_Durian_4_20250411_202919	1744378160	84	Outdoor air, Durian, Mealybug
Red	16.7881	9.47349	19.2764	-5.00166	34.06	53.81	MB_Durian_4_20250411_203922	1744378762	84	Outdoor air, Durian, Mealybug
Red	-21.9918	-68.995	-58.9645	-44.9621	34.43	52.49	MB_Durian_4_20250411_204925	1744379365	84	Outdoor air, Durian, Mealybug
Red	12.2349	-7.76418	5.57759	-16.9677	34.54	53.43	MB_Durian_5_20250411_213042	1744381843	84	Outdoor air, Durian, Mealybug
Red	17.0632	14.2737	26.0798	-8.11615	34.19	53.5	MB_Durian_5_20250411_214046	1744382447	84	Outdoor air, Durian, Mealybug
Red	-4.83095	-40.2929	-32.2324	-32.1936	34.16	53.54	MB_Durian_5_20250411_215050	1744383050	84	Outdoor air, Durian, Mealybug
Red	-26.8348	-77.2411	-61.9184	-53.9176	38	46.64	MB_Durian_1_20250411_172650	1744367210	85	Outdoor air, Durian, Mealybug
Red	-21.7246	-53.1806	-32.9855	-42.1301	37.47	43.98	MB_Durian_1_20250411_173651	1744367811	85	Outdoor air, Durian, Mealybug
Red	-41.4731	-104.703	-85.3675	-59.5751	37.38	45.8	MB_Durian_1_20250411_174652	1744368412	85	Outdoor air, Durian, Mealybug
Red	-47.419	-209.474	-203.78	-34.2966	36.33	57.52	MB_Durian_2_20250411_182542	1744370743	85	Outdoor air, Durian, Mealybug
Red	-46.0108	-244.854	-240.687	-77.6587	35.64	62.13	MB_Durian_2_20250411_183543	1744371344	85	Outdoor air, Durian, Mealybug
Red	-46.4159	-211.474	-206.537	-55.233	35.39	60.51	MB_Durian_2_20250411_184545	1744371945	85	Outdoor air, Durian, Mealybug
Red	-38.6551	-171.204	-166.144	-88.1099	35.26	57.34	MB_Durian_3_20250411_192902	1744374543	85	Outdoor air, Durian, Mealybug
Red	-5.20554	-100.257	-94.3537	-40.3551	34.63	60.62	MB_Durian_3_20250411_193904	1744375145	85	Outdoor air, Durian, Mealybug
Red	-29.986	-132.789	-128.768	-62.7514	34.4	58.28	MB_Durian_3_20250411_194907	1744375747	85	Outdoor air, Durian, Mealybug
Red	-22.0036	-111.271	-107.162	-56.1818	34.43	55.91	MB_Durian_4_20250411_202919	1744378160	85	Outdoor air, Durian, Mealybug
Red	18.1582	12.0841	21.8511	-4.44212	34.02	53.9	MB_Durian_4_20250411_203922	1744378762	85	Outdoor air, Durian, Mealybug
Red	-21.4186	-69.5217	-58.5227	-44.8927	34.41	52.57	MB_Durian_4_20250411_204925	1744379365	85	Outdoor air, Durian, Mealybug
Red	13.9244	-2.77642	10.5682	-15.807	34.5	53.42	MB_Durian_5_20250411_213042	1744381843	85	Outdoor air, Durian, Mealybug
Red	18.6569	18.5484	30.3456	-7.13584	34.15	53.52	MB_Durian_5_20250411_214046	1744382447	85	Outdoor air, Durian, Mealybug
Red	-4.99066	-41.4814	-33.4403	-33.4942	34.16	53.59	MB_Durian_5_20250411_215050	1744383050	85	Outdoor air, Durian, Mealybug
Red	-26.9306	-78.9542	-62.6431	-54.0979	38	46.67	MB_Durian_1_20250411_172650	1744367210	86	Outdoor air, Durian, Mealybug
Red	-20.9916	-51.5188	-32.3358	-43.7602	37.45	44.01	MB_Durian_1_20250411_173651	1744367811	86	Outdoor air, Durian, Mealybug
Red	-41.7286	-107.605	-89.3002	-59.056	37.38	45.88	MB_Durian_1_20250411_174652	1744368412	86	Outdoor air, Durian, Mealybug
Red	-48.2805	-213.99	-208.35	-36.4132	36.34	57.66	MB_Durian_2_20250411_182542	1744370743	86	Outdoor air, Durian, Mealybug
Red	-46.1705	-247.043	-241.895	-78.9592	35.64	62.18	MB_Durian_2_20250411_183543	1744371344	86	Outdoor air, Durian, Mealybug
Red	-45.3644	-209.338	-204.425	-54.7683	35.36	60.57	MB_Durian_2_20250411_184545	1744371945	86	Outdoor air, Durian, Mealybug
Red	-38.2407	-170.016	-164.957	-87.8348	35.25	57.34	MB_Durian_3_20250411_192902	1744374543	86	Outdoor air, Durian, Mealybug
Red	-5.60035	-99.5458	-93.6703	-39.2256	34.61	60.69	MB_Durian_3_20250411_193904	1744375145	86	Outdoor air, Durian, Mealybug
Red	-28.8706	-130.177	-126.173	-61.1664	34.37	58.32	MB_Durian_3_20250411_194907	1744375747	86	Outdoor air, Durian, Mealybug
Red	-21.1118	-111.323	-106.257	-56.0176	34.4	56.02	MB_Durian_4_20250411_202919	1744378160	86	Outdoor air, Durian, Mealybug
Red	18.317	11.3699	20.1057	-5.64787	34.01	53.98	MB_Durian_4_20250411_203922	1744378762	86	Outdoor air, Durian, Mealybug
Red	-20.9731	-69.9993	-60.0473	-45.0638	34.39	52.69	MB_Durian_4_20250411_204925	1744379365	86	Outdoor air, Durian, Mealybug
Red	13.7966	-4.72728	9.60183	-16.0475	34.5	53.46	MB_Durian_5_20250411_213042	1744381843	86	Outdoor air, Durian, Mealybug
Red	19.3579	19.9725	30.7537	-6.82601	34.13	53.56	MB_Durian_5_20250411_214046	1744382447	86	Outdoor air, Durian, Mealybug
Red	-4.19467	-42.2469	-33.2608	-33.5103	34.13	53.73	MB_Durian_5_20250411_215050	1744383050	86	Outdoor air, Durian, Mealybug
Red	-25.3689	-75.9173	-58.6189	-53.1777	37.96	46.7	MB_Durian_1_20250411_172650	1744367210	87	Outdoor air, Durian, Mealybug
Red	-21.6092	-51.569	-31.3901	-43.5452	37.44	44.02	MB_Durian_1_20250411_173651	1744367811	87	Outdoor air, Durian, Mealybug
Red	-41.442	-107.368	-89.0793	-59.0213	37.37	45.92	MB_Durian_1_20250411_174652	1744368412	87	Outdoor air, Durian, Mealybug
Red	-48.3887	-214.042	-208.445	-36.2491	36.31	57.77	MB_Durian_2_20250411_182542	1744370743	87	Outdoor air, Durian, Mealybug
Red	-45.0231	-244.193	-239.058	-80.3141	35.61	62.21	MB_Durian_2_20250411_183543	1744371344	87	Outdoor air, Durian, Mealybug
Red	-45.3005	-209.862	-203.942	-53.6481	35.36	60.55	MB_Durian_2_20250411_184545	1744371945	87	Outdoor air, Durian, Mealybug
Red	-37.5077	-169.354	-163.307	-87.4648	35.23	57.37	MB_Durian_3_20250411_192902	1744374543	87	Outdoor air, Durian, Mealybug
Red	-4.64465	-98.1227	-92.2829	-38.9412	34.58	60.78	MB_Durian_3_20250411_193904	1744375145	87	Outdoor air, Durian, Mealybug
Red	-28.9665	-130.89	-126.898	-62.3468	34.37	58.35	MB_Durian_3_20250411_194907	1744375747	87	Outdoor air, Durian, Mealybug
Red	-20.7293	-110.373	-105.312	-55.8026	34.39	56.03	MB_Durian_4_20250411_202919	1744378160	87	Outdoor air, Durian, Mealybug
Red	17.8707	9.94467	19.6768	-5.98311	34.02	53.99	MB_Durian_4_20250411_203922	1744378762	87	Outdoor air, Durian, Mealybug
Red	-20.1443	-67.6243	-57.6728	-44.5135	34.37	52.69	MB_Durian_4_20250411_204925	1744379365	87	Outdoor air, Durian, Mealybug
Red	14.0832	-4.49062	9.82272	-16.0128	34.49	53.5	MB_Durian_5_20250411_213042	1744381843	87	Outdoor air, Durian, Mealybug
Red	19.5168	19.2583	30.0083	-6.03176	34.12	53.64	MB_Durian_5_20250411_214046	1744382447	87	Outdoor air, Durian, Mealybug
Red	-3.65251	-40.1085	-31.1072	-32.9947	34.12	53.69	MB_Durian_5_20250411_215050	1744383050	87	Outdoor air, Durian, Mealybug
Red	-25.4966	-76.8682	-60.5853	-48.4181	37.96	46.74	MB_Durian_1_20250411_172650	1744367210	88	Outdoor air, Durian, Mealybug
Red	-21.004	-51.8579	-30.7067	-43.4157	37.42	44.09	MB_Durian_1_20250411_173651	1744367811	88	Outdoor air, Durian, Mealybug
Red	-41.5378	-108.082	-89.8041	-58.2017	37.37	45.95	MB_Durian_1_20250411_174652	1744368412	88	Outdoor air, Durian, Mealybug
Red	-48.2618	-214.994	-209.432	-36.5149	36.3	57.86	MB_Durian_2_20250411_182542	1744370743	88	Outdoor air, Durian, Mealybug
Red	-44.4179	-243.482	-238.374	-81.1846	35.59	62.28	MB_Durian_2_20250411_183543	1744371344	88	Outdoor air, Durian, Mealybug
Red	-44.1212	-206.775	-200.863	-52.9429	35.33	60.57	MB_Durian_2_20250411_184545	1744371945	88	Outdoor air, Durian, Mealybug
Red	-37.3604	-166.505	-161.47	-86.8198	35.2	57.4	MB_Durian_3_20250411_192902	1744374543	88	Outdoor air, Durian, Mealybug
Red	-4.83629	-99.549	-93.7324	-40.3019	34.58	60.84	MB_Durian_3_20250411_193904	1744375145	88	Outdoor air, Durian, Mealybug
Red	-28.8076	-132.604	-127.643	-62.5525	34.36	58.43	MB_Durian_3_20250411_194907	1744375747	88	Outdoor air, Durian, Mealybug
Red	-21.0168	-112.513	-107.486	-56.3435	34.39	56.12	MB_Durian_4_20250411_202919	1744378160	88	Outdoor air, Durian, Mealybug
Red	19.4005	13.7439	22.4595	-5.12302	33.98	54.03	MB_Durian_4_20250411_203922	1744378762	88	Outdoor air, Durian, Mealybug
Red	-19.6669	-67.8641	-57.9558	-44.6245	34.35	52.8	MB_Durian_4_20250411_204925	1744379365	88	Outdoor air, Durian, Mealybug
Red	15.3264	-1.92808	13.3845	-15.1874	34.46	53.5	MB_Durian_5_20250411_213042	1744381843	88	Outdoor air, Durian, Mealybug
Red	19.2932	17.5943	28.3172	-7.45253	34.12	53.71	MB_Durian_5_20250411_214046	1744382447	88	Outdoor air, Durian, Mealybug
Red	-3.60099	-37.9723	-28.995	-32.53	34.09	53.75	MB_Durian_5_20250411_215050	1744383050	88	Outdoor air, Durian, Mealybug
Red	-24.7317	-76.9686	-58.6939	-45.9881	37.94	46.76	MB_Durian_1_20250411_172650	1744367210	89	Outdoor air, Durian, Mealybug
Red	-21.2276	-53.522	-32.3978	-44.8365	37.42	44.16	MB_Durian_1_20250411_173651	1744367811	89	Outdoor air, Durian, Mealybug
Red	-40.5182	-107.183	-88.9335	-55.797	37.34	46.02	MB_Durian_1_20250411_174652	1744368412	89	Outdoor air, Durian, Mealybug
Red	-48.1668	-217.184	-210.661	-33.8409	36.29	57.96	MB_Durian_2_20250411_182542	1744370743	89	Outdoor air, Durian, Mealybug
Red	-45.5776	-244.671	-239.582	-82.4852	35.59	62.33	MB_Durian_2_20250411_183543	1744371344	89	Outdoor air, Durian, Mealybug
Red	-42.91	-203.45	-198.543	-52.1776	35.3	60.58	MB_Durian_2_20250411_184545	1744371945	89	Outdoor air, Durian, Mealybug
Red	-37.6478	-168.644	-163.644	-87.3608	35.2	57.49	MB_Durian_3_20250411_192902	1744374543	89	Outdoor air, Durian, Mealybug
Red	-4.10334	-97.8871	-92.0827	-39.9319	34.56	60.87	MB_Durian_3_20250411_193904	1744375145	89	Outdoor air, Durian, Mealybug
Red	-28.7765	-134.269	-129.355	-62.9987	34.35	58.55	MB_Durian_3_20250411_194907	1744375747	89	Outdoor air, Durian, Mealybug
Red	-20.22	-111.376	-105.353	-55.8534	34.37	56.13	MB_Durian_4_20250411_202919	1744378160	89	Outdoor air, Durian, Mealybug
Red	19.4324	12.9816	22.7011	-5.06291	33.98	54.02	MB_Durian_4_20250411_203922	1744378762	89	Outdoor air, Durian, Mealybug
Red	-19.7308	-69.3395	-58.4389	-44.7447	34.35	52.82	MB_Durian_4_20250411_204925	1744379365	89	Outdoor air, Durian, Mealybug
Red	15.1667	-3.11666	11.1765	-15.4879	34.46	53.55	MB_Durian_5_20250411_213042	1744381843	89	Outdoor air, Durian, Mealybug
Red	19.8984	18.3053	29.0005	-7.32304	34.1	53.78	MB_Durian_5_20250411_214046	1744382447	89	Outdoor air, Durian, Mealybug
Red	-2.66487	-38.4477	-29.4782	-32.6502	34.09	53.77	MB_Durian_5_20250411_215050	1744383050	89	Outdoor air, Durian, Mealybug
Red	-24.8915	-78.1572	-60.9019	-46.2886	37.94	46.81	MB_Durian_1_20250411_172650	1744367210	90	Outdoor air, Durian, Mealybug
Red	-19.5381	-49.5342	-28.4072	-43.6758	37.38	44.15	MB_Durian_1_20250411_173651	1744367811	90	Outdoor air, Durian, Mealybug
Red	-39.3389	-104.096	-85.8549	-55.0918	37.31	46.04	MB_Durian_1_20250411_174652	1744368412	90	Outdoor air, Durian, Mealybug
Red	-47.1153	-215.047	-209.549	-33.3761	36.26	58.02	MB_Durian_2_20250411_182542	1744370743	90	Outdoor air, Durian, Mealybug
Red	-45.0044	-245.197	-240.141	-83.4158	35.57	62.41	MB_Durian_2_20250411_183543	1744371344	90	Outdoor air, Durian, Mealybug
Red	-43.7192	-204.927	-199.047	-55.3233	35.29	60.65	MB_Durian_2_20250411_184545	1744371945	90	Outdoor air, Durian, Mealybug
Red	-36.15	-166.083	-160.103	-86.5608	35.16	57.54	MB_Durian_3_20250411_192902	1744374543	90	Outdoor air, Durian, Mealybug
Red	-4.32693	-99.5511	-93.7738	-40.3527	34.56	60.94	MB_Durian_3_20250411_193904	1744375145	90	Outdoor air, Durian, Mealybug
Red	-27.8208	-132.846	-127.968	-62.7143	34.32	58.64	MB_Durian_3_20250411_194907	1744375747	90	Outdoor air, Durian, Mealybug
Red	-19.3273	-108.525	-102.495	-55.1829	34.35	56.11	MB_Durian_4_20250411_202919	1744378160	90	Outdoor air, Durian, Mealybug
Red	20.9622	16.7808	26.4837	-4.20282	33.94	54.06	MB_Durian_4_20250411_203922	1744378762	90	Outdoor air, Durian, Mealybug
Red	-18.7112	-67.441	-56.5683	-44.3401	34.32	52.89	MB_Durian_4_20250411_204925	1744379365	90	Outdoor air, Durian, Mealybug
Red	17.1748	2.34547	16.6296	-14.2325	34.41	53.57	MB_Durian_5_20250411_213042	1744381843	90	Outdoor air, Durian, Mealybug
Red	20.153	17.3043	28.9798	-7.34846	34.09	53.83	MB_Durian_5_20250411_214046	1744382447	90	Outdoor air, Durian, Mealybug
Red	-2.41019	-38.4488	-29.4989	-32.6756	34.08	53.82	MB_Durian_5_20250411_215050	1744383050	90	Outdoor air, Durian, Mealybug
Red	-23.17	-72.9317	-55.6697	-45.0679	37.9	46.79	MB_Durian_1_20250411_172650	1744367210	91	Outdoor air, Durian, Mealybug
Red	-19.5061	-49.2965	-28.1657	-43.6157	37.38	44.14	MB_Durian_1_20250411_173651	1744367811	91	Outdoor air, Durian, Mealybug
Red	-40.1677	-107.471	-88.2294	-55.6421	37.33	46.04	MB_Durian_1_20250411_174652	1744368412	91	Outdoor air, Durian, Mealybug
Red	-46.1153	-216.047	-209.549	-32.3761	36.26	58.02	MB_Durian_2_20250411_182542	1744370743	91	Outdoor air, Durian, Mealybug
Red	-43.4427	-241.16	-236.116	-83.4956	35.53	62.44	MB_Durian_2_20250411_183543	1744371344	91	Outdoor air, Durian, Mealybug
Red	-42.4121	-201.889	-195.002	-57.3776	35.26	60.63	MB_Durian_2_20250411_184545	1744371945	91	Outdoor air, Durian, Mealybug
Red	-36.3416	-167.509	-161.553	-86.9214	35.16	57.6	MB_Durian_3_20250411_192902	1744374543	91	Outdoor air, Durian, Mealybug
Red	-1.41469	-94.8021	-90.0455	-39.2776	34.51	60.99	MB_Durian_3_20250411_193904	1744375145	91	Outdoor air, Durian, Mealybug
Red	-26.7693	-130.71	-126.856	-62.2496	34.29	58.7	MB_Durian_3_20250411_194907	1744375747	91	Outdoor air, Durian, Mealybug
Red	-18.2111	-104.011	-97.9465	-54.0916	34.33	56.02	MB_Durian_4_20250411_202919	1744378160	91	Outdoor air, Durian, Mealybug
Red	19.6232	12.5051	22.1972	-5.20855	33.97	54.09	MB_Durian_4_20250411_203922	1744378762	91	Outdoor air, Durian, Mealybug
Red	-17.6597	-65.3048	-54.4561	-44.8753	34.29	52.95	MB_Durian_4_20250411_204925	1744379365	91	Outdoor air, Durian, Mealybug
Red	15.8358	-1.93021	12.3431	-15.2382	34.44	53.6	MB_Durian_5_20250411_213042	1744381843	91	Outdoor air, Durian, Mealybug
Red	21.1726	19.2028	30.8505	-6.94383	34.06	53.9	MB_Durian_5_20250411_214046	1744382447	91	Outdoor air, Durian, Mealybug
Red	-1.32673	-37.0748	-27.1451	-32.1508	34.05	53.87	MB_Durian_5_20250411_215050	1744383050	91	Outdoor air, Durian, Mealybug
Red	-23.9473	-74.1705	-56.932	-46.1534	37.89	46.85	MB_Durian_1_20250411_172650	1744367210	92	Outdoor air, Durian, Mealybug
Red	-19.7936	-52.4359	-31.34	-44.1567	37.38	44.23	MB_Durian_1_20250411_173651	1744367811	92	Outdoor air, Durian, Mealybug
Red	-39.6264	-108.235	-88.0292	-54.6328	37.31	46.13	MB_Durian_1_20250411_174652	1744368412	92	Outdoor air, Durian, Mealybug
Red	-44.5855	-212.248	-205.766	-28.5161	36.22	58.06	MB_Durian_2_20250411_182542	1744370743	92	Outdoor air, Durian, Mealybug
Red	-42.8055	-241.212	-236.191	-84.306	35.51	62.5	MB_Durian_2_20250411_183543	1744371344	92	Outdoor air, Durian, Mealybug
Red	-41.3287	-199.515	-192.648	-58.8528	35.23	60.68	MB_Durian_2_20250411_184545	1744371945	92	Outdoor air, Durian, Mealybug
Red	-36.1189	-168.748	-161.815	-87.007	35.15	57.66	MB_Durian_3_20250411_192902	1744374543	92	Outdoor air, Durian, Mealybug
Red	-0.841437	-95.3288	-89.6037	-39.2082	34.49	61.07	MB_Durian_3_20250411_193904	1744375145	92	Outdoor air, Durian, Mealybug
Red	-28.0133	-137.175	-132.371	-63.5813	34.31	58.83	MB_Durian_3_20250411_194907	1744375747	92	Outdoor air, Durian, Mealybug
Red	-17.5411	-100.921	-95.8265	-53.3356	34.32	55.94	MB_Durian_4_20250411_202919	1744378160	92	Outdoor air, Durian, Mealybug
Red	21.4716	16.7786	26.4423	-4.25365	33.92	54.16	MB_Durian_4_20250411_203922	1744378762	92	Outdoor air, Durian, Mealybug
Red	-18.6277	-65.067	-55.2145	-44.8152	34.29	52.94	MB_Durian_4_20250411_204925	1744379365	92	Outdoor air, Durian, Mealybug
Red	17.2697	0.155838	15.401	-14.5584	34.4	53.67	MB_Durian_5_20250411_213042	1744381843	92	Outdoor air, Durian, Mealybug
Red	21.5231	19.9149	30.5545	-6.78891	34.05	53.92	MB_Durian_5_20250411_214046	1744382447	92	Outdoor air, Durian, Mealybug
Red	-1.70918	-38.0246	-28.0907	-32.3658	34.06	53.86	MB_Durian_5_20250411_215050	1744383050	92	Outdoor air, Durian, Mealybug
Red	-24.075	-76.1213	-57.8983	-47.3938	37.89	46.89	MB_Durian_1_20250411_172650	1744367210	93	Outdoor air, Durian, Mealybug
Red	-18.774	-50.5374	-29.4693	-43.7521	37.35	44.3	MB_Durian_1_20250411_173651	1744367811	93	Outdoor air, Durian, Mealybug
Red	-40.4552	-111.61	-91.4037	-55.1831	37.33	46.13	MB_Durian_1_20250411_174652	1744368412	93	Outdoor air, Durian, Mealybug
Red	-44.6494	-212.724	-206.249	-28.6363	36.22	58.08	MB_Durian_2_20250411_182542	1744370743	93	Outdoor air, Durian, Mealybug
Red	-42.9652	-242.4	-237.399	-85.6066	35.51	62.55	MB_Durian_2_20250411_183543	1744371344	93	Outdoor air, Durian, Mealybug
Red	-42.6366	-205.456	-199.647	-62.3047	35.25	60.83	MB_Durian_2_20250411_184545	1744371945	93	Outdoor air, Durian, Mealybug
Red	-34.4941	-166.138	-159.261	-87.4728	35.1	57.8	MB_Durian_3_20250411_192902	1744374543	93	Outdoor air, Durian, Mealybug
Red	-1.35165	-97.2295	-91.5157	-39.6637	34.5	61.1	MB_Durian_3_20250411_193904	1744375145	93	Outdoor air, Durian, Mealybug
Red	-25.0815	-130.528	-125.772	-62.1015	34.23	58.95	MB_Durian_3_20250411_194907	1744375747	93	Outdoor air, Durian, Mealybug
Red	-17.1702	-97.408	-91.2984	-53.2698	34.29	55.9	MB_Durian_4_20250411_202919	1744378160	93	Outdoor air, Durian, Mealybug
Red	22.3004	18.1537	28.8168	-3.70339	33.9	54.16	MB_Durian_4_20250411_203922	1744378762	93	Outdoor air, Durian, Mealybug
Red	-19.5843	-69.3929	-58.5554	-45.6059	34.31	52.98	MB_Durian_4_20250411_204925	1744379365	93	Outdoor air, Durian, Mealybug
Red	18.7676	3.71731	18.942	-13.7585	34.36	53.72	MB_Durian_5_20250411_213042	1744381843	93	Outdoor air, Durian, Mealybug
Red	21.5551	20.1526	30.7961	-6.7288	34.05	53.91	MB_Durian_5_20250411_214046	1744382447	93	Outdoor air, Durian, Mealybug
Red	-1.23175	-38.2645	-28.3737	-32.4767	34.04	53.97	MB_Durian_5_20250411_215050	1744383050	93	Outdoor air, Durian, Mealybug
Red	-24.0431	-76.8836	-58.6568	-49.3337	37.89	46.88	MB_Durian_1_20250411_172650	1744367210	94	Outdoor air, Durian, Mealybug
Red	-18.5193	-51.5384	-30.49	-43.7775	37.34	44.35	MB_Durian_1_20250411_173651	1744367811	94	Outdoor air, Durian, Mealybug
Red	-38.8615	-107.336	-87.1379	-52.2028	37.29	46.15	MB_Durian_1_20250411_174652	1744368412	94	Outdoor air, Durian, Mealybug
Red	-43.7567	-210.873	-204.392	-27.9658	36.2	58.06	MB_Durian_2_20250411_182542	1744370743	94	Outdoor air, Durian, Mealybug
Red	-41.8179	-239.551	-234.562	-84.9615	35.48	62.58	MB_Durian_2_20250411_183543	1744371344	94	Outdoor air, Durian, Mealybug
Red	-42.5424	-208.548	-202.829	-65.137	35.23	61.06	MB_Durian_2_20250411_184545	1744371945	94	Outdoor air, Durian, Mealybug
Red	-34.7496	-168.04	-162.194	-87.9537	35.1	57.88	MB_Durian_3_20250411_192902	1744374543	94	Outdoor air, Durian, Mealybug
Red	-0.236246	-94.6178	-88.9203	-39.0787	34.47	61.14	MB_Durian_3_20250411_193904	1744375145	94	Outdoor air, Durian, Mealybug
Red	-26.337	-133.43	-127.704	-62.5824	34.23	59.03	MB_Durian_3_20250411_194907	1744375747	94	Outdoor air, Durian, Mealybug
Red	-17.0105	-96.2194	-90.0905	-52.9692	34.29	55.85	MB_Durian_4_20250411_202919	1744378160	94	Outdoor air, Durian, Mealybug
Red	23.0014	19.5778	30.225	-3.39356	33.88	54.2	MB_Durian_4_20250411_203922	1744378762	94	Outdoor air, Durian, Mealybug
Red	-19.043	-69.1573	-58.3552	-45.5967	34.29	53.07	MB_Durian_4_20250411_204925	1744379365	94	Outdoor air, Durian, Mealybug
Red	19.883	6.32899	20.5374	-13.1735	34.33	53.76	MB_Durian_5_20250411_213042	1744381843	94	Outdoor air, Durian, Mealybug
Red	22.7024	23.002	33.6331	-6.08374	34.02	53.94	MB_Durian_5_20250411_214046	1744382447	94	Outdoor air, Durian, Mealybug
Red	0.0753009	-34.2265	-24.3288	-30.5311	34.01	53.95	MB_Durian_5_20250411_215050	1744383050	94	Outdoor air, Durian, Mealybug
Red	-22.5133	-73.0844	-54.8741	-48.4736	37.85	46.92	MB_Durian_1_20250411_172650	1744367210	95	Outdoor air, Durian, Mealybug
Red	-17.2327	-51.3018	-30.2691	-42.7428	37.33	44.39	MB_Durian_1_20250411_173651	1744367811	95	Outdoor air, Durian, Mealybug
Red	-38.6822	-105.249	-85.0593	-51.4976	37.26	46.17	MB_Durian_1_20250411_174652	1744368412	95	Outdoor air, Durian, Mealybug
Red	-42.7052	-208.737	-202.28	-29.501	36.17	58.12	MB_Durian_2_20250411_182542	1744370743	95	Outdoor air, Durian, Mealybug
Red	-41.6271	-240.027	-235.066	-87.1071	35.47	62.65	MB_Durian_2_20250411_183543	1744371344	95	Outdoor air, Durian, Mealybug
Red	-41.97	-209.978	-204.34	-65.5739	35.2	61.27	MB_Durian_2_20250411_184545	1744371945	95	Outdoor air, Durian, Mealybug
Red	-34.9413	-170.466	-163.643	-87.3144	35.1	57.94	MB_Durian_3_20250411_192902	1744374543	95	Outdoor air, Durian, Mealybug
Red	-0.0135036	-94.8566	-89.1826	-39.1642	34.46	61.2	MB_Durian_3_20250411_193904	1744375145	95	Outdoor air, Durian, Mealybug
Red	-24.9546	-132.48	-127.759	-62.3674	34.22	59.04	MB_Durian_3_20250411_194907	1744375747	95	Outdoor air, Durian, Mealybug
Red	-15.5757	-91.2306	-86.0792	-51.7832	34.26	55.79	MB_Durian_4_20250411_202919	1744378160	95	Outdoor air, Durian, Mealybug
Red	23.3519	20.2899	30.929	-3.23865	33.87	54.22	MB_Durian_4_20250411_203922	1744378762	95	Outdoor air, Durian, Mealybug
Red	-18.2781	-67.2577	-56.4638	-45.1666	34.27	53.09	MB_Durian_4_20250411_204925	1744379365	95	Outdoor air, Durian, Mealybug
Red	20.1696	6.56565	20.7583	-13.1388	34.32	53.8	MB_Durian_5_20250411_213042	1744381843	95	Outdoor air, Durian, Mealybug
Red	23.2126	23.9027	35.5451	-5.62827	34.01	53.91	MB_Durian_5_20250411_214046	1744382447	95	Outdoor air, Durian, Mealybug
Red	0.552727	-35.4663	-24.6118	-31.6421	33.99	54.06	MB_Durian_5_20250411_215050	1744383050	95	Outdoor air, Durian, Mealybug
Red	-20.8762	-73.1357	-53.9491	-48.284	37.83	46.98	MB_Durian_1_20250411_172650	1744367210	96	Outdoor air, Durian, Mealybug
Red	-17.5317	-50.8776	-28.861	-39.433	37.31	44.43	MB_Durian_1_20250411_173651	1744367811	96	Outdoor air, Durian, Mealybug
Red	-37.3432	-100.973	-80.7728	-50.4919	37.23	46.14	MB_Durian_1_20250411_174652	1744368412	96	Outdoor air, Durian, Mealybug
Red	-42.8764	-207.362	-199.905	-28.9508	36.15	58.12	MB_Durian_2_20250411_182542	1744370743	96	Outdoor air, Durian, Mealybug
Red	-40.4797	-238.178	-232.229	-87.4621	35.44	62.68	MB_Durian_2_20250411_183543	1744371344	96	Outdoor air, Durian, Mealybug
Red	-41.2699	-210.456	-204.886	-65.7704	35.17	61.44	MB_Durian_2_20250411_184545	1744371945	96	Outdoor air, Durian, Mealybug
Red	-34.3042	-169.518	-162.718	-87.1248	35.08	58	MB_Durian_3_20250411_192902	1744374543	96	Outdoor air, Durian, Mealybug
Red	1.67515	-91.7716	-86.1454	-38.5099	34.41	61.32	MB_Durian_3_20250411_193904	1744375145	96	Outdoor air, Durian, Mealybug
Red	-24.4132	-132.244	-127.559	-62.3581	34.2	59.13	MB_Durian_3_20250411_194907	1744375747	96	Outdoor air, Durian, Mealybug
Red	-14.2048	-87.7172	-81.5511	-50.7173	34.23	55.75	MB_Durian_4_20250411_202919	1744378160	96	Outdoor air, Durian, Mealybug
Red	24.3076	20.713	32.3165	-2.95424	33.84	54.31	MB_Durian_4_20250411_203922	1744378762	96	Outdoor air, Durian, Mealybug
Red	-16.6844	-63.9831	-52.198	-44.1863	34.23	53.11	MB_Durian_4_20250411_204925	1744379365	96	Outdoor air, Durian, Mealybug
Red	19.946	3.90164	19.0672	-13.5596	34.32	53.87	MB_Durian_5_20250411_213042	1744381843	96	Outdoor air, Durian, Mealybug
Red	24.4558	27.4652	39.1069	-4.80287	33.98	53.91	MB_Durian_5_20250411_214046	1744382447	96	Outdoor air, Durian, Mealybug
Red	1.28568	-33.8044	-22.962	-31.2721	33.97	54.09	MB_Durian_5_20250411_215050	1744383050	96	Outdoor air, Durian, Mealybug
Red	-20.6534	-73.3745	-55.2114	-47.3696	37.82	47.04	MB_Durian_1_20250411_172650	1744367210	97	Outdoor air, Durian, Mealybug
Red	-17.4048	-51.8295	-29.8481	-38.6988	37.3	44.52	MB_Durian_1_20250411_173651	1744367811	97	Outdoor air, Durian, Mealybug
Red	-37.471	-101.924	-81.7391	-51.7323	37.23	46.18	MB_Durian_1_20250411_174652	1744368412	97	Outdoor air, Durian, Mealybug
Red	-42.7167	-206.173	-199.697	-28.6502	36.15	58.07	MB_Durian_2_20250411_182542	1744370743	97	Outdoor air, Durian, Mealybug
Red	-40.7672	-240.317	-234.404	-88.003	35.44	62.77	MB_Durian_2_20250411_183543	1744371344	97	Outdoor air, Durian, Mealybug
Red	-42.6417	-217.872	-211.367	-61.3425	35.19	61.61	MB_Durian_2_20250411_184545	1744371945	97	Outdoor air, Durian, Mealybug
Red	-32.6155	-166.433	-159.681	-86.4704	35.03	58.12	MB_Durian_3_20250411_192902	1744374543	97	Outdoor air, Durian, Mealybug
Red	0.686665	-96.3352	-89.7279	-39.3607	34.43	61.37	MB_Durian_3_20250411_193904	1744375145	97	Outdoor air, Durian, Mealybug
Red	-24.4771	-132.72	-128.042	-62.4783	34.2	59.15	MB_Durian_3_20250411_194907	1744375747	97	Outdoor air, Durian, Mealybug
Red	-12.9616	-84.1546	-77.9893	-49.8919	34.2	55.75	MB_Durian_4_20250411_202919	1744378160	97	Outdoor air, Durian, Mealybug
Red	25.3911	23.087	34.6703	-1.42939	33.81	54.36	MB_Durian_4_20250411_203922	1744378762	97	Outdoor air, Durian, Mealybug
Red	-16.876	-65.4094	-53.6476	-43.547	34.23	53.17	MB_Durian_4_20250411_204925	1744379365	97	Outdoor air, Durian, Mealybug
Red	21.1573	7.22647	22.3873	-12.7943	34.29	53.88	MB_Durian_5_20250411_213042	1744381843	97	Outdoor air, Durian, Mealybug
Red	24.6466	26.9887	38.603	-4.94851	33.97	53.98	MB_Durian_5_20250411_214046	1744382447	97	Outdoor air, Durian, Mealybug
Red	1.49691	-30.4796	-19.6419	-30.5068	33.94	54.1	MB_Durian_5_20250411_215050	1744383050	97	Outdoor air, Durian, Mealybug
Red	-19.0917	-70.3376	-51.1872	-44.4494	37.78	47.07	MB_Durian_1_20250411_172650	1744367210	98	Outdoor air, Durian, Mealybug
Red	-17.1501	-52.8306	-30.8688	-38.7243	37.29	44.57	MB_Durian_1_20250411_173651	1744367811	98	Outdoor air, Durian, Mealybug
Red	-37.0886	-101.974	-80.7935	-53.5173	37.22	46.19	MB_Durian_1_20250411_174652	1744368412	98	Outdoor air, Durian, Mealybug
Red	-40.5374	-203.086	-196.618	-21.9451	36.12	58.09	MB_Durian_2_20250411_182542	1744370743	98	Outdoor air, Durian, Mealybug
Red	-41.0547	-242.457	-237.578	-88.544	35.44	62.86	MB_Durian_2_20250411_183543	1744371344	98	Outdoor air, Durian, Mealybug
Red	-42.2601	-219.825	-212.375	-52.6338	35.17	61.75	MB_Durian_2_20250411_184545	1744371945	98	Outdoor air, Durian, Mealybug
Red	-31.564	-165.296	-158.569	-86.0057	35	58.18	MB_Durian_3_20250411_192902	1744374543	98	Outdoor air, Durian, Mealybug
Red	2.10912	-89.6855	-83.0876	-37.8301	34.37	61.39	MB_Durian_3_20250411_193904	1744375145	98	Outdoor air, Durian, Mealybug
Red	-23.3298	-130.87	-125.205	-61.8333	34.17	59.18	MB_Durian_3_20250411_194907	1744375747	98	Outdoor air, Durian, Mealybug
Red	-12.3875	-81.7785	-75.5941	-49.3163	34.19	55.7	MB_Durian_4_20250411_202919	1744378160	98	Outdoor air, Durian, Mealybug
Red	25.3272	22.6116	34.1871	-1.54961	33.81	54.38	MB_Durian_4_20250411_203922	1744378762	98	Outdoor air, Durian, Mealybug
Red	-16.6214	-65.4105	-53.6683	-43.5724	34.22	53.22	MB_Durian_4_20250411_204925	1744379365	98	Outdoor air, Durian, Mealybug
Red	20.9656	5.80018	20.9378	-14.155	34.29	53.94	MB_Durian_5_20250411_213042	1744381843	98	Outdoor air, Durian, Mealybug
Red	25.3157	27.1752	39.7696	-4.6988	33.95	54.03	MB_Durian_5_20250411_214046	1744382447	98	Outdoor air, Durian, Mealybug
Red	0.2218	-34.2799	-23.4452	-31.3924	33.97	54.11	MB_Durian_5_20250411_215050	1744383050	98	Outdoor air, Durian, Mealybug
Red	-18.5823	-70.3397	-51.2286	-44.5002	37.76	47.17	MB_Durian_1_20250411_172650	1744367210	99	Outdoor air, Durian, Mealybug
Red	-16.0028	-50.9812	-28.0318	-38.0792	37.26	44.6	MB_Durian_1_20250411_173651	1744367811	99	Outdoor air, Durian, Mealybug
Red	-37.2802	-104.4	-83.243	-55.878	37.22	46.25	MB_Durian_1_20250411_174652	1744368412	99	Outdoor air, Durian, Mealybug
Red	-40.4736	-203.611	-196.135	-9.82483	36.12	58.07	MB_Durian_2_20250411_182542	1744370743	99	Outdoor air, Durian, Mealybug
Red	-39.2063	-238.183	-233.333	-88.5891	35.39	62.93	MB_Durian_2_20250411_183543	1744371344	99	Outdoor air, Durian, Mealybug
Red	-42.0701	-222.205	-214.832	-49.2857	35.15	61.95	MB_Durian_2_20250411_184545	1744371945	99	Outdoor air, Durian, Mealybug
Red	-32.6794	-167.908	-161.164	-86.5907	35.03	58.14	MB_Durian_3_20250411_192902	1744374543	99	Outdoor air, Durian, Mealybug
Red	1.94941	-90.8741	-84.2955	-38.1307	34.37	61.44	MB_Durian_3_20250411_193904	1744375145	99	Outdoor air, Durian, Mealybug
Red	-23.139	-131.347	-125.709	-61.9789	34.16	59.25	MB_Durian_3_20250411_194907	1744375747	99	Outdoor air, Durian, Mealybug
Red	-12.4514	-83.254	-76.0773	-49.4365	34.19	55.72	MB_Durian_4_20250411_202919	1744378160	99	Outdoor air, Durian, Mealybug
Red	25.4541	21.6596	32.2	-1.81547	33.8	54.47	MB_Durian_4_20250411_203922	1744378762	99	Outdoor air, Durian, Mealybug
Red	-15.8245	-63.2732	-51.5353	-43.0822	34.2	53.23	MB_Durian_4_20250411_204925	1744379365	99	Outdoor air, Durian, Mealybug
Red	21.6666	6.22434	22.3459	-13.8451	34.27	53.98	MB_Durian_5_20250411_213042	1744381843	99	Outdoor air, Durian, Mealybug
Red	25.3796	27.6506	40.2527	-4.57858	33.95	54.01	MB_Durian_5_20250411_214046	1744382447	99	Outdoor air, Durian, Mealybug
Red	1.94239	-30.9572	-20.1664	-30.6779	33.92	54.22	MB_Durian_5_20250411_215050	1744383050	99	Outdoor air, Durian, Mealybug
Red	-20.6027	-75.141	-55.0526	-44.4111	37.78	47.23	MB_Durian_1_20250411_172650	1744367210	100	Outdoor air, Durian, Mealybug
Red	-15.2379	-49.0816	-26.1404	-37.6491	37.24	44.62	MB_Durian_1_20250411_173651	1744367811	100	Outdoor air, Durian, Mealybug
Red	-36.037	-101.838	-79.6812	-56.0526	37.19	46.25	MB_Durian_1_20250411_174652	1744368412	100	Outdoor air, Durian, Mealybug
Red	-38.5613	-198.862	-191.407	-1.74972	36.07	58.12	MB_Durian_2_20250411_182542	1744370743	100	Outdoor air, Durian, Mealybug
Red	-39.7485	-240.322	-235.486	-89.1047	35.4	62.97	MB_Durian_2_20250411_183543	1744371344	100	Outdoor air, Durian, Mealybug
Red	-41.2422	-221.732	-215.411	-49.2417	35.12	62.08	MB_Durian_2_20250411_184545	1744371945	100	Outdoor air, Durian, Mealybug
Red	-31.3093	-166.298	-158.59	-86.0311	34.99	58.23	MB_Durian_3_20250411_192902	1744374543	100	Outdoor air, Durian, Mealybug
Red	3.35144	-88.0258	-81.4792	-37.511	34.33	61.52	MB_Durian_3_20250411_193904	1744375145	100	Outdoor air, Durian, Mealybug
Red	-23.6607	-129.684	-124.038	-61.5835	34.15	59.23	MB_Durian_3_20250411_194907	1744375747	100	Outdoor air, Durian, Mealybug
Red	-11.336	-80.6423	-73.4819	-48.8515	34.16	55.76	MB_Durian_4_20250411_202919	1744378160	100	Outdoor air, Durian, Mealybug
Red	26.219	23.5592	34.0914	-1.38542	33.78	54.49	MB_Durian_4_20250411_203922	1744378762	100	Outdoor air, Durian, Mealybug
Red	-14.6772	-60.4238	-49.6984	-42.4371	34.17	53.26	MB_Durian_4_20250411_204925	1744379365	100	Outdoor air, Durian, Mealybug
Red	22.3676	7.64851	22.7541	-13.5353	34.25	54.02	MB_Durian_5_20250411_213042	1744381843	100	Outdoor air, Durian, Mealybug
Red	26.9413	31.6875	44.277	-3.65837	33.91	54.04	MB_Durian_5_20250411_214046	1744382447	100	Outdoor air, Durian, Mealybug
Red	2.35678	-30.7697	-19.9792	-30.4028	33.91	54.22	MB_Durian_5_20250411_215050	1744383050	100	Outdoor air, Durian, Mealybug
Red	-35.2052	-93.4625	-79.0638	-61.4388	38.24	46.46	MB_Durian_1_20250411_172650	1744367210	71	Outdoor air, Durian, Mealybug
