# Supplementary material for: Utilizing E-nose for detection of mealybug infestation and ripeness of durian
Source: PeerJ. 2025 Aug 25;13:e19936. doi: 10.7717/peerj.19936 (PMC12393072; doi:10.7717/peerj.19936)
Supplement: Supplemental Information 3 [file peerj-13-19936-s003.xlsx]

## Sheet: 20250621_MT
GM102B_rel	GM302B_rel	GM502B_rel	GM702B_rel	temperature	humidity	treatment	TRT	timestamp	time	LD
0.547965	6.22145	8.63131	-3.37372	31.02	48.56	210668R1_20250621_141116	Without mealybug	1.75049e+09	71	5883.27
1.04735	5.59174	9.05559	-3.00382	31	48.58	210668R1_20250621_141116	Without mealybug	1.75049e+09	72	11244.9
1.07271	5.39298	9.18142	-4.19639	31	48.68	210668R1_20250621_141116	Without mealybug	1.75049e+09	73	11517.1
1.56448	5.82289	9.56795	-3.46872	30.98	48.67	210668R1_20250621_141116	Without mealybug	1.75049e+09	74	16797.3
2.31101	6.39819	9.19179	-2.79462	30.95	48.69	210668R1_20250621_141116	Without mealybug	1.75049e+09	75	24813
3.29963	7.21826	9.99002	-1.57781	30.91	48.69	210668R1_20250621_141116	Without mealybug	1.75049e+09	76	35427.8
2.30594	6.43794	9.16662	-2.55611	30.95	48.67	210668R1_20250621_141116	Without mealybug	1.75049e+09	77	24758.6
2.54932	7.4034	10.2022	-1.39286	30.9	48.7	210668R1_20250621_141116	Without mealybug	1.75049e+09	78	27371.8
2.55946	7.3239	10.2525	-1.86988	30.9	48.74	210668R1_20250621_141116	Without mealybug	1.75049e+09	79	27480.7
3.30092	7.93895	10.8512	-0.957272	30.87	48.74	210668R1_20250621_141116	Without mealybug	1.75049e+09	80	35441.8
3.5633	8.02472	11.1262	-1.36861	30.86	48.8	210668R1_20250621_141116	Without mealybug	1.75049e+09	81	38258.8
3.57344	7.94521	11.1766	-1.84563	30.86	48.84	210668R1_20250621_141116	Without mealybug	1.75049e+09	82	38367.7
4.56713	8.72553	11.9999	-0.867331	30.82	48.86	210668R1_20250621_141116	Without mealybug	1.75049e+09	83	49036.9
5.08172	8.97656	12.4997	-1.21298	30.8	48.94	210668R1_20250621_141116	Without mealybug	1.75049e+09	84	54562.1
5.33902	9.10208	12.7496	-0.385799	30.79	48.98	210668R1_20250621_141116	Without mealybug	1.75049e+09	85	57324.7
5.84601	9.41273	13.2117	-0.373674	30.77	49.03	210668R1_20250621_141116	Without mealybug	1.75049e+09	86	62768.2
6.10331	9.53825	13.4615	-0.546496	30.76	49.07	210668R1_20250621_141116	Without mealybug	1.75049e+09	87	65530.8
6.85745	10.0539	14.1231	-0.230167	30.73	49.12	210668R1_20250621_141116	Without mealybug	1.75049e+09	88	73628
7.61413	9.54972	14.7973	-0.0330945	30.7	49.18	210668R1_20250621_141116	Without mealybug	1.75049e+09	89	81752.3
7.1325	10.0403	14.4611	-1.23779	30.72	49.23	210668R1_20250621_141116	Without mealybug	1.75049e+09	90	76581.2
7.14011	9.98068	14.4989	-1.59556	30.72	49.26	210668R1_20250621_141116	Without mealybug	1.75049e+09	91	76662.9
8.64079	10.0717	15.7843	-0.605128	30.66	49.33	210668R1_20250621_141116	Without mealybug	1.75049e+09	92	92775.4
8.63825	10.0915	15.7717	-0.485871	30.66	49.32	210668R1_20250621_141116	Without mealybug	1.75049e+09	93	92748.2
8.4	10.5476	16.471	-0.527312	30.63	49.4	210668R1_20250621_141116	Without mealybug	1.75049e+09	94	90190.1
7.92091	10.0183	16.1474	-1.85126	30.65	49.46	210668R1_20250621_141116	Without mealybug	1.75049e+09	95	85046
9.16175	11.0036	17.1704	-0.568753	30.6	49.48	210668R1_20250621_141116	Without mealybug	1.75049e+09	96	98368.9
9.66367	11.354	17.6072	-0.318115	30.58	49.51	210668R1_20250621_141116	Without mealybug	1.75049e+09	97	103758
9.67635	11.2547	17.6702	-0.914398	30.58	49.56	210668R1_20250621_141116	Without mealybug	1.75049e+09	98	103894
10.1833	11.5653	18.1322	-0.902273	30.56	49.61	210668R1_20250621_141116	Without mealybug	1.75049e+09	99	109338
9.69917	11.0758	17.7834	-1.98771	30.58	49.65	210668R1_20250621_141116	Without mealybug	1.75049e+09	100	104139
0.269221	4.12199	10.3018	-14.1189	30.97	49.71	210668R2_20250621_141914	Without mealybug	1.75049e+09	71	2889.62
0.261613	4.18161	10.264	-13.7612	30.97	49.68	210668R2_20250621_141914	Without mealybug	1.75049e+09	72	2807.95
1.01068	4.73704	10.9005	-13.2063	30.94	49.71	210668R2_20250621_141914	Without mealybug	1.75049e+09	73	10850.7
1.02336	4.63766	10.9634	-13.8026	30.94	49.76	210668R2_20250621_141914	Without mealybug	1.75049e+09	74	10986.8
1.27813	4.78305	11.2007	-12.8562	30.93	49.79	210668R2_20250621_141914	Without mealybug	1.75049e+09	75	13722.2
2.0348	5.27885	10.8749	-12.6591	30.9	49.85	210668R2_20250621_141914	Without mealybug	1.75049e+09	76	21846.8
1.30602	4.56442	10.3391	-14.168	30.93	49.9	210668R2_20250621_141914	Without mealybug	1.75049e+09	77	14021.9
2.79909	5.71502	11.5868	-12.8198	30.87	49.94	210668R2_20250621_141914	Without mealybug	1.75049e+09	78	30052.9
3.05639	5.84053	11.8367	-12.9926	30.86	49.98	210668R2_20250621_141914	Without mealybug	1.75049e+09	79	32815.5
3.80039	6.43571	12.4479	-12.1993	30.83	49.99	210668R2_20250621_141914	Without mealybug	1.75049e+09	80	40803.9
3.81053	6.35621	12.4983	-12.6763	30.83	50.03	210668R2_20250621_141914	Without mealybug	1.75049e+09	81	40912.8
2.8156	6.31646	12.5234	-12.9148	30.83	50.05	210668R2_20250621_141914	Without mealybug	1.75049e+09	82	30230.2
3.56467	6.87188	13.1599	-12.36	30.8	50.08	210668R2_20250621_141914	Without mealybug	1.75049e+09	83	38273
3.82958	6.93777	13.4475	-12.8906	30.79	50.15	210668R2_20250621_141914	Without mealybug	1.75049e+09	84	41117.2
3.83465	6.89802	13.4727	-13.1291	30.79	50.17	210668R2_20250621_141914	Without mealybug	1.75049e+09	85	41171.7
4.33403	7.2683	13.8969	-12.7592	30.77	50.19	210668R2_20250621_141914	Without mealybug	1.75049e+09	86	46533.5
4.34671	6.16892	13.9599	-13.3555	30.77	50.24	210668R2_20250621_141914	Without mealybug	1.75049e+09	87	46669.4
4.86131	6.41995	14.4596	-13.7011	30.75	50.32	210668R2_20250621_141914	Without mealybug	1.75049e+09	88	52194.6
5.09962	7.42516	15.47	-12.2993	30.7	50.33	210668R2_20250621_141914	Without mealybug	1.75049e+09	89	54753.3
5.36452	7.49105	15.7577	-12.8299	30.69	50.4	210668R2_20250621_141914	Without mealybug	1.75049e+09	90	57597.6
5.61928	7.63644	14.995	-12.8835	30.68	50.43	210668R2_20250621_141914	Without mealybug	1.75049e+09	91	60333.2
6.1212	7.98685	15.4318	-12.6329	30.66	50.46	210668R2_20250621_141914	Without mealybug	1.75049e+09	92	65722.2
6.37343	8.15212	15.6565	-12.5672	30.65	50.48	210668R2_20250621_141914	Without mealybug	1.75049e+09	93	68430.4
6.14656	7.78809	15.5577	-13.8254	30.66	50.56	210668R2_20250621_141914	Without mealybug	1.75049e+09	94	65994.5
7.14279	8.54853	17.3936	-12.9664	30.62	50.59	210668R2_20250621_141914	Without mealybug	1.75049e+09	95	76690.7
7.63709	8.95857	17.7927	-12.358	30.6	50.59	210668R2_20250621_141914	Without mealybug	1.75049e+09	96	81998.1
8.15169	9.2096	18.2925	-12.7036	30.58	50.67	210668R2_20250621_141914	Without mealybug	1.75049e+09	97	87523.3
8.14915	9.22947	18.2799	-12.5844	30.58	50.66	210668R2_20250621_141914	Without mealybug	1.75049e+09	98	87496.1
9.40268	10.1154	19.3658	-11.8981	30.53	50.73	210668R2_20250621_141914	Without mealybug	1.75049e+09	99	100955
9.41789	9.99618	18.4413	-12.6137	30.53	50.79	210668R2_20250621_141914	Without mealybug	1.75049e+09	100	101119
0.703903	5.26847	9.55034	-10.3882	30.95	49.69	210668R3_20250621_142651	Without mealybug	1.75049e+09	71	7557.2
1.19821	5.6785	9.94946	-9.77976	30.93	49.69	210668R3_20250621_142651	Without mealybug	1.75049e+09	72	12864.6
1.20836	5.599	9.99979	-10.2568	30.93	49.73	210668R3_20250621_142651	Without mealybug	1.75049e+09	73	12973.5
2.45934	6.50483	11.0731	-9.4513	30.88	49.79	210668R3_20250621_142651	Without mealybug	1.75049e+09	74	26405.3
2.46441	6.46508	11.0982	-9.68982	30.88	49.81	210668R3_20250621_142651	Without mealybug	1.75049e+09	75	26459.8
2.73693	6.47134	11.4236	-9.57818	30.87	49.91	210668R3_20250621_142651	Without mealybug	1.75049e+09	76	29385.7
3.48093	7.06652	12.0349	-8.78482	30.84	49.92	210668R3_20250621_142651	Without mealybug	1.75049e+09	77	37374
3.75091	7.09266	12.3477	-9.55393	30.83	50.01	210668R3_20250621_142651	Without mealybug	1.75049e+09	78	40272.7
4.01074	7.1983	12.6102	-9.84601	30.82	50.06	210668R3_20250621_142651	Without mealybug	1.75049e+09	79	43062.6
4.51266	7.5487	13.047	-10.5954	30.8	50.09	210668R3_20250621_142651	Without mealybug	1.75049e+09	80	48451.6
4.02849	6.05917	12.6983	-11.6808	30.82	50.13	210668R3_20250621_142651	Without mealybug	1.75049e+09	81	43252.9
4.52156	7.20977	12.9459	-10.3326	30.76	50.17	210668R3_20250621_142651	Without mealybug	1.75049e+09	82	48547.2
3.7801	6.59472	13.3473	-11.2452	30.79	50.17	210668R3_20250621_142651	Without mealybug	1.75049e+09	83	40585.9
4.55453	6.95138	13.1095	-11.8829	30.76	50.3	210668R3_20250621_142651	Without mealybug	1.75049e+09	84	48901.1
4.80676	7.11665	13.3342	-11.8173	30.75	50.32	210668R3_20250621_142651	Without mealybug	1.75049e+09	85	51609.2
5.55075	7.71183	14.9455	-11.0239	30.72	50.33	210668R3_20250621_142651	Without mealybug	1.75049e+09	86	59597.4
5.30614	7.48693	14.7585	-11.4474	30.73	50.34	210668R3_20250621_142651	Without mealybug	1.75049e+09	87	56970.9
6.29729	8.28713	14.5693	-9.3498	30.69	50.35	210668R3_20250621_142651	Without mealybug	1.75049e+09	88	67613.1
6.55459	8.41264	14.8192	-9.52262	30.68	50.39	210668R3_20250621_142651	Without mealybug	1.75049e+09	89	70375.7
7.30366	8.96807	15.4556	-8.96778	30.65	50.42	210668R3_20250621_142651	Without mealybug	1.75049e+09	90	78418.5
7.30619	8.94819	15.4682	-9.08703	30.65	50.43	210668R3_20250621_142651	Without mealybug	1.75049e+09	91	78445.7
7.81825	9.2191	15.9554	-9.31342	30.63	50.5	210668R3_20250621_142651	Without mealybug	1.75049e+09	92	83943.7
7.32141	8.82894	15.5437	-9.80257	30.65	50.49	210668R3_20250621_142651	Without mealybug	1.75049e+09	93	78609
8.82209	9.91991	16.8292	-8.81214	30.59	50.56	210668R3_20250621_142651	Without mealybug	1.75049e+09	94	94721.8
9.06417	10.1647	17.0035	-8.26943	30.58	50.54	210668R3_20250621_142651	Without mealybug	1.75049e+09	95	97321
8.82716	9.88016	16.8543	-9.05066	30.59	50.58	210668R3_20250621_142651	Without mealybug	1.75049e+09	96	94776.2
9.81831	10.6804	17.6651	-7.9531	30.55	50.59	210668R3_20250621_142651	Without mealybug	1.75049e+09	97	105418
9.83353	10.5611	17.7406	-8.66864	30.55	50.65	210668R3_20250621_142651	Without mealybug	1.75049e+09	98	105582
10.8374	11.2619	18.6144	-8.16736	30.51	50.71	210668R3_20250621_142651	Without mealybug	1.75049e+09	99	116360
10.6029	10.9575	18.4777	-9.06785	30.52	50.76	210668R3_20250621_142651	Without mealybug	1.75049e+09	100	113842
1.26277	7.31457	8.243	1.11093	30.95	49.08	210668R4_20250621_143424	Without mealybug	1.75049e+09	71	13558.4
1.50992	7.51959	8.44255	1.41514	30.94	49.08	210668R4_20250621_143424	Without mealybug	1.75049e+09	72	16212.1
1.52768	7.38046	8.53064	0.580338	30.94	49.15	210668R4_20250621_143424	Without mealybug	1.75049e+09	73	16402.7
1.53528	7.32083	8.56839	0.222568	30.94	49.18	210668R4_20250621_143424	Without mealybug	1.75049e+09	74	16484.4
2.28943	7.83651	9.22998	0.538897	30.91	49.23	210668R4_20250621_143424	Without mealybug	1.75049e+09	75	24581.6
2.52897	8.10115	9.39178	1.20087	30.9	49.2	210668R4_20250621_143424	Without mealybug	1.75049e+09	76	27153.6
3.03343	8.43168	9.84123	1.33225	30.88	49.24	210668R4_20250621_143424	Without mealybug	1.75049e+09	77	32569.9
3.29833	7.49757	9.12887	0.801661	30.87	49.31	210668R4_20250621_143424	Without mealybug	1.75049e+09	78	35414.1
4.05501	7.99337	9.80304	0.998733	30.84	49.37	210668R4_20250621_143424	Without mealybug	1.75049e+09	79	43538.6
4.54932	8.4034	10.2022	1.60714	30.82	49.37	210668R4_20250621_143424	Without mealybug	1.75049e+09	80	48846
4.06515	7.91387	9.85338	0.521707	30.84	49.41	210668R4_20250621_143424	Without mealybug	1.75049e+09	81	43647.5
4.57468	8.20465	11.328	0.414575	30.82	49.47	210668R4_20250621_143424	Without mealybug	1.75049e+09	82	49118
5.32375	8.76007	11.9644	0.969418	30.79	49.5	210668R4_20250621_143424	Without mealybug	1.75049e+09	83	57160.8
6.0855	9.21612	12.6638	0.927977	30.76	49.58	210668R4_20250621_143424	Without mealybug	1.75049e+09	84	65339.7
6.10072	9.09687	12.7393	0.212437	30.76	49.64	210668R4_20250621_143424	Without mealybug	1.75049e+09	85	65503
5.84595	8.95147	11.5019	0.266002	30.77	49.61	210668R4_20250621_143424	Without mealybug	1.75049e+09	86	62767.8
6.35801	9.22238	11.9891	0.039614	30.75	49.68	210668R4_20250621_143424	Without mealybug	1.75049e+09	87	68265.8
7.609	10.1282	13.0624	0.845095	30.7	49.74	210668R4_20250621_143424	Without mealybug	1.75049e+09	88	81697.6
7.8663	10.2537	13.3123	0.672273	30.69	49.78	210668R4_20250621_143424	Without mealybug	1.75049e+09	89	84460.2
7.89166	10.055	13.4382	-0.520295	30.69	49.88	210668R4_20250621_143424	Without mealybug	1.75049e+09	90	84732.5
7.88659	10.0947	13.413	-0.281781	30.69	49.86	210668R4_20250621_143424	Without mealybug	1.75049e+09	91	84678
8.89296	10.7757	14.2993	0.100239	30.65	49.93	210668R4_20250621_143424	Without mealybug	1.75049e+09	92	95483.4
8.9031	10.6962	14.3496	-0.376788	30.65	49.97	210668R4_20250621_143424	Without mealybug	1.75049e+09	93	95592.3
9.41263	10.9869	14.8242	-0.48392	30.63	50.03	210668R4_20250621_143424	Without mealybug	1.75049e+09	94	101063
9.68007	11.033	15.1245	-1.13377	30.62	50.11	210668R4_20250621_143424	Without mealybug	1.75049e+09	95	103935
10.4165	11.6878	15.698	0.0173573	30.59	50.09	210668R4_20250621_143424	Without mealybug	1.75049e+09	96	111841
10.6712	10.8331	15.9353	-0.0362085	30.58	50.12	210668R4_20250621_143424	Without mealybug	1.75049e+09	97	114576
11.1833	12.1041	16.4225	-0.262597	30.56	50.19	210668R4_20250621_143424	Without mealybug	1.75049e+09	98	120074
11.9374	12.6197	17.0841	0.0537324	30.53	50.24	210668R4_20250621_143424	Without mealybug	1.75049e+09	99	128172
12.1947	12.7452	17.334	-0.11909	30.52	50.28	210668R4_20250621_143424	Without mealybug	1.75049e+09	100	130934
-0.683891	4.02366	9.67974	-13.0054	31.04	50.24	210668R5_20250621_144201	Without mealybug	1.75049e+09	71	-7343.84
0.304726	4.84373	10.478	-11.7885	31	50.24	210668R5_20250621_144201	Without mealybug	1.75049e+09	72	3270.96
0.299654	4.88348	10.4528	-11.55	31	50.22	210668R5_20250621_144201	Without mealybug	1.75049e+09	73	3216.51
1.06648	5.29977	11.1773	-10.83	30.97	50.32	210668R5_20250621_144201	Without mealybug	1.75049e+09	74	11449.8
1.07408	5.24014	11.2151	-11.1877	30.97	50.35	210668R5_20250621_144201	Without mealybug	1.75049e+09	75	11531.5
2.05509	5.11984	11.9755	-9.61316	30.93	50.32	210668R5_20250621_144201	Without mealybug	1.75049e+09	76	22064.4
2.07284	4.98071	12.0636	-10.448	30.93	50.39	210668R5_20250621_144201	Without mealybug	1.75049e+09	77	22255
2.07538	4.96084	12.0762	-10.5672	30.93	50.4	210668R5_20250621_144201	Without mealybug	1.75049e+09	78	22282.2
2.57983	5.29137	12.5256	-10.4358	30.91	50.44	210668R5_20250621_144201	Without mealybug	1.75049e+09	79	27698.5
3.32637	5.86667	13.1495	-9.76173	30.88	50.46	210668R5_20250621_144201	Without mealybug	1.75049e+09	80	35714
2.84728	5.33738	12.8259	-12.0857	30.9	50.52	210668R5_20250621_144201	Without mealybug	1.75049e+09	81	30570
3.83336	6.17733	13.6115	-10.7496	30.86	50.51	210668R5_20250621_144201	Without mealybug	1.75049e+09	82	41157.6
3.85111	6.0382	13.6996	-11.5844	30.86	50.58	210668R5_20250621_144201	Without mealybug	1.75049e+09	83	41348.1
3.86125	5.95869	13.7499	-12.0614	30.86	50.62	210668R5_20250621_144201	Without mealybug	1.75049e+09	84	41457
6.0831	7.82373	15.5334	-9.20434	30.77	50.61	210668R5_20250621_144201	Without mealybug	1.75049e+09	85	65313.1
5.34925	7.14905	14.9724	-10.4747	30.8	50.64	210668R5_20250621_144201	Without mealybug	1.75049e+09	86	57433.7
5.61416	7.21493	14.2601	-11.0053	30.79	50.71	210668R5_20250621_144201	Without mealybug	1.75049e+09	87	60278.1
5.62684	7.11556	15.323	-11.6016	30.79	50.76	210668R5_20250621_144201	Without mealybug	1.75049e+09	88	60414
6.37083	7.71073	15.9343	-9.80824	30.76	50.77	210668R5_20250621_144201	Without mealybug	1.75049e+09	89	68402.4
6.64081	7.73687	16.2471	-10.5773	30.75	50.86	210668R5_20250621_144201	Without mealybug	1.75049e+09	90	71301.1
6.15287	8.00777	15.7343	-10.8037	30.73	50.93	210668R5_20250621_144201	Without mealybug	1.75049e+09	91	66062.2
6.89434	8.62283	17.3329	-9.89112	30.7	50.93	210668R5_20250621_144201	Without mealybug	1.75049e+09	92	74023.1
7.40386	8.91361	16.8075	-9.99825	30.68	50.99	210668R5_20250621_144201	Without mealybug	1.75049e+09	93	79494.1
7.16685	8.62909	16.6583	-10.7795	30.69	51.03	210668R5_20250621_144201	Without mealybug	1.75049e+09	94	76949.3
8.16307	9.38953	17.4943	-9.92044	30.65	51.06	210668R5_20250621_144201	Without mealybug	1.75049e+09	95	87645.7
8.16561	9.36965	17.5069	-10.0397	30.65	51.07	210668R5_20250621_144201	Without mealybug	1.75049e+09	96	87673
8.91468	9.92508	18.1433	-9.48485	30.62	51.1	210668R5_20250621_144201	Without mealybug	1.75049e+09	97	95715.7
8.66753	9.72006	17.9438	-9.78906	30.63	51.1	210668R5_20250621_144201	Without mealybug	1.75049e+09	98	93062
9.42928	9.17611	18.6431	-9.8305	30.6	51.18	210668R5_20250621_144201	Without mealybug	1.75049e+09	99	101241
9.93119	9.52652	19.08	-9.57986	30.58	51.21	210668R5_20250621_144201	Without mealybug	1.75049e+09	100	106630
2.097	6.31857	10.2849	-6.56819	32.9	46.2	With_Mealybug_1_20250621_133115	With mealybug	1.75049e+09	71	22514.9
2.11221	6.19931	10.3604	-7.28373	32.9	46.26	With_Mealybug_1_20250621_133115	With mealybug	1.75049e+09	72	22678.3
3.34798	7.2244	11.3582	-5.76271	32.85	46.26	With_Mealybug_1_20250621_133115	With mealybug	1.75049e+09	73	35946.8
3.36827	7.06539	10.4589	-6.71677	32.85	46.34	With_Mealybug_1_20250621_133115	With mealybug	1.75049e+09	74	36164.8
3.36703	7.80596	11.3074	-4.97697	32.81	46.38	With_Mealybug_1_20250621_133115	With mealybug	1.75049e+09	75	36151.5
4.12118	8.32164	11.969	-4.66065	32.78	46.43	With_Mealybug_1_20250621_133115	With mealybug	1.75049e+09	76	44248.7
4.37847	8.44715	12.2189	-4.83347	32.77	46.47	With_Mealybug_1_20250621_133115	With mealybug	1.75049e+09	77	47011.3
5.11994	9.0622	12.8176	-3.92086	32.74	46.47	With_Mealybug_1_20250621_133115	With mealybug	1.75049e+09	78	54972.4
5.13515	7.94295	12.8931	-4.6364	32.74	46.53	With_Mealybug_1_20250621_133115	With mealybug	1.75049e+09	79	55135.5
5.89944	8.37912	13.605	-4.79709	32.71	46.62	With_Mealybug_1_20250621_133115	With mealybug	1.75049e+09	80	63341.6
6.6409	8.99417	14.2037	-3.88448	32.68	46.62	With_Mealybug_1_20250621_133115	With mealybug	1.75049e+09	81	71302.7
7.15296	9.26508	13.6909	-4.11087	32.66	46.69	With_Mealybug_1_20250621_133115	With mealybug	1.75049e+09	82	76800.9
7.65488	9.61548	14.1278	-3.86023	32.64	46.72	With_Mealybug_1_20250621_133115	With mealybug	1.75049e+09	83	82189.9
7.91725	9.70125	14.4028	-4.27157	32.63	46.78	With_Mealybug_1_20250621_133115	With mealybug	1.75049e+09	84	85007
8.67139	10.2169	15.0644	-3.95524	32.6	46.83	With_Mealybug_1_20250621_133115	With mealybug	1.75049e+09	85	93104.2
8.92869	9.34244	15.3143	-4.12806	32.59	46.87	With_Mealybug_1_20250621_133115	With mealybug	1.75049e+09	86	95866.5
8.94013	9.98362	16.2258	-3.98455	32.55	46.96	With_Mealybug_1_20250621_133115	With mealybug	1.75049e+09	87	95989.3
8.94267	9.96375	15.2384	-4.10381	32.55	46.97	With_Mealybug_1_20250621_133115	With mealybug	1.75049e+09	88	96016.8
9.44458	10.3142	15.6752	-3.85317	32.53	47	With_Mealybug_1_20250621_133115	With mealybug	1.75049e+09	89	101406
10.1937	10.8696	16.3116	-3.29833	32.5	47.03	With_Mealybug_1_20250621_133115	With mealybug	1.75049e+09	90	109449
10.6981	11.2001	16.7611	-3.16695	32.48	47.07	With_Mealybug_1_20250621_133115	With mealybug	1.75049e+09	91	114865
11.2051	10.5108	17.2231	-3.15482	32.46	47.12	With_Mealybug_1_20250621_133115	With mealybug	1.75049e+09	92	120308
11.9643	10.9867	17.9099	-3.07701	32.43	47.19	With_Mealybug_1_20250621_133115	With mealybug	1.75049e+09	93	128460
11.9745	10.9072	17.9602	-3.55403	32.43	47.23	With_Mealybug_1_20250621_133115	With mealybug	1.75049e+09	94	128569
13.4726	12.018	19.233	-2.44435	32.37	47.29	With_Mealybug_1_20250621_133115	With mealybug	1.75049e+09	95	144654
12.9821	12.3088	19.7077	-2.55148	32.35	47.35	With_Mealybug_1_20250621_133115	With mealybug	1.75049e+09	96	139388
12.74	12.0641	19.5333	-3.0942	32.36	47.37	With_Mealybug_1_20250621_133115	With mealybug	1.75049e+09	97	136789
13.7439	12.7649	20.407	-1.59292	32.32	47.43	With_Mealybug_1_20250621_133115	With mealybug	1.75049e+09	98	147567
13.9936	12.95	20.6191	-1.40797	32.31	47.44	With_Mealybug_1_20250621_133115	With mealybug	1.75049e+09	99	150248
14.7655	13.3266	20.3688	-1.92644	32.28	47.56	With_Mealybug_1_20250621_133115	With mealybug	1.75049e+09	100	158536
0.129631	7.42346	5.97443	14.0243	31.74	46.33	With_Mealybug_2_20250621_133917	With mealybug	1.75049e+09	71	1392.36
0.386929	8.54898	6.22432	13.8515	31.73	46.37	With_Mealybug_2_20250621_133917	With mealybug	1.75049e+09	72	4155.18
-0.605463	8.48935	6.26207	13.4937	31.73	46.4	With_Mealybug_2_20250621_133917	With mealybug	1.75049e+09	73	-6500.15
0.138535	8.08453	6.87332	14.2871	31.7	46.41	With_Mealybug_2_20250621_133917	With mealybug	1.75049e+09	74	1487.95
0.403442	8.15041	7.16096	13.7565	31.69	46.48	With_Mealybug_2_20250621_133917	With mealybug	1.75049e+09	75	4332.21
1.88129	9.42027	8.33314	15.8202	31.63	46.46	With_Mealybug_2_20250621_133917	With mealybug	1.75049e+09	76	20200
1.89905	9.28114	8.42122	14.9854	31.63	46.53	With_Mealybug_2_20250621_133917	With mealybug	1.75049e+09	77	20390.5
1.89651	8.30102	7.40864	16.1047	31.63	46.52	With_Mealybug_2_20250621_133917	With mealybug	1.75049e+09	78	20363.3
2.65573	8.77694	8.09539	15.1825	31.6	46.59	With_Mealybug_2_20250621_133917	With mealybug	1.75049e+09	79	28514.9
3.15511	9.14722	8.51967	15.5524	31.58	46.61	With_Mealybug_2_20250621_133917	With mealybug	1.75049e+09	80	33876.8
3.6697	9.39825	9.01946	15.2067	31.56	46.69	With_Mealybug_2_20250621_133917	With mealybug	1.75049e+09	81	39402
4.17162	9.74866	9.45632	15.4574	31.54	46.72	With_Mealybug_2_20250621_133917	With mealybug	1.75049e+09	82	44791
4.4416	9.7748	9.76913	14.6883	31.53	46.81	With_Mealybug_2_20250621_133917	With mealybug	1.75049e+09	83	47689.7
4.18813	10.3501	10.393	15.3624	31.5	46.83	With_Mealybug_2_20250621_133917	With mealybug	1.75049e+09	84	44968.3
4.44036	10.5154	10.6177	15.428	31.49	46.85	With_Mealybug_2_20250621_133917	With mealybug	1.75049e+09	85	47676.4
4.94481	10.8459	11.0671	16.5594	31.47	46.89	With_Mealybug_2_20250621_133917	With mealybug	1.75049e+09	86	53092.7
5.45433	11.1367	11.5418	15.4523	31.45	46.95	With_Mealybug_2_20250621_133917	With mealybug	1.75049e+09	87	58563.5
5.96132	11.4473	12.0038	15.4644	31.43	47	With_Mealybug_2_20250621_133917	With mealybug	1.75049e+09	88	64007
5.48223	9.91804	11.6802	14.1405	31.45	47.06	With_Mealybug_2_20250621_133917	With mealybug	1.75049e+09	89	58862.7
6.96769	11.1283	12.8901	15.8464	31.39	47.07	With_Mealybug_2_20250621_133917	With mealybug	1.75049e+09	90	74812.1
6.98291	11.009	11.9656	15.1309	31.39	47.13	With_Mealybug_2_20250621_133917	With mealybug	1.75049e+09	91	74975.7
7.73198	11.5644	12.602	15.6857	31.36	47.16	With_Mealybug_2_20250621_133917	With mealybug	1.75049e+09	92	83018.4
7.98674	11.7098	12.8393	15.6322	31.35	47.19	With_Mealybug_2_20250621_133917	With mealybug	1.75049e+09	93	85753.8
7.98928	11.69	12.8519	15.5129	31.35	47.2	With_Mealybug_2_20250621_133917	With mealybug	1.75049e+09	94	85781
8.98043	12.4902	13.6627	16.6105	31.31	47.21	With_Mealybug_2_20250621_133917	With mealybug	1.75049e+09	95	96423
9.00579	12.2914	13.7886	16.4179	31.31	47.31	With_Mealybug_2_20250621_133917	With mealybug	1.75049e+09	96	96695.3
8.75486	12.8468	14.425	16.9728	31.28	47.34	With_Mealybug_2_20250621_133917	With mealybug	1.75049e+09	97	94001
9.49886	13.442	15.0362	17.7661	31.25	47.35	With_Mealybug_2_20250621_133917	With mealybug	1.75049e+09	98	101989
9.26692	13.1177	14.9122	16.7464	31.26	47.41	With_Mealybug_2_20250621_133917	With mealybug	1.75049e+09	99	99499
10.2657	13.8583	15.7607	17.4862	31.22	47.45	With_Mealybug_2_20250621_133917	With mealybug	1.75049e+09	100	110223
0.0599431	7.36589	5.94602	4.01179	31.25	47.57	With_Mealybug_3_20250621_134657	With mealybug	1.75049e+09	71	644.144
0.0599431	6.36589	5.94602	4.01179	31.25	47.57	With_Mealybug_3_20250621_134657	With mealybug	1.75049e+09	72	643.913
0.809013	6.92131	6.58244	4.56663	31.22	47.6	With_Mealybug_3_20250621_134657	With mealybug	1.75049e+09	73	8686.68
1.06124	7.08658	6.80716	5.63233	31.21	47.62	With_Mealybug_3_20250621_134657	With mealybug	1.75049e+09	74	11394.8
0.829302	6.76231	6.6831	4.61258	31.22	47.68	With_Mealybug_3_20250621_134657	With mealybug	1.75049e+09	75	8904.46
1.58598	7.2581	7.35728	4.80965	31.19	47.74	With_Mealybug_3_20250621_134657	With mealybug	1.75049e+09	76	17028.9
1.60373	7.11897	7.44536	3.97486	31.19	47.81	With_Mealybug_3_20250621_134657	With mealybug	1.75049e+09	77	17219.5
2.09804	7.52901	7.84447	4.58326	31.17	47.81	With_Mealybug_3_20250621_134657	With mealybug	1.75049e+09	78	22526.9
1.11833	7.37	7.94514	3.62921	31.17	47.89	With_Mealybug_3_20250621_134657	With mealybug	1.75049e+09	79	12007.7
2.34649	8.45472	8.90518	5.508	31.12	47.86	With_Mealybug_3_20250621_134657	With mealybug	1.75049e+09	80	25194.5
2.61647	8.48085	9.21798	4.7389	31.11	47.95	With_Mealybug_3_20250621_134657	With mealybug	1.75049e+09	81	28093.2
3.61016	9.26117	10.0414	5.7172	31.07	47.97	With_Mealybug_3_20250621_134657	With mealybug	1.75049e+09	82	38762.4
3.61016	9.26117	10.0414	4.7172	31.07	47.97	With_Mealybug_3_20250621_134657	With mealybug	1.75049e+09	83	38762.4
4.36937	9.7371	10.7281	4.79502	31.04	48.04	With_Mealybug_3_20250621_134657	With mealybug	1.75049e+09	84	46914.1
3.89789	9.14818	10.4423	4.1133	31.06	48.13	With_Mealybug_3_20250621_134657	With mealybug	1.75049e+09	85	41851.7
4.88143	9.008	10.2153	4.56863	31.02	48.11	With_Mealybug_3_20250621_134657	With mealybug	1.75049e+09	86	52412
5.39857	9.23915	10.7277	4.10373	31	48.2	With_Mealybug_3_20250621_134657	With mealybug	1.75049e+09	87	57964.4
5.14888	9.05401	10.5156	3.91878	31.01	48.19	With_Mealybug_3_20250621_134657	With mealybug	1.75049e+09	88	55283.5
5.89795	9.60944	11.152	4.47362	30.98	48.22	With_Mealybug_3_20250621_134657	With mealybug	1.75049e+09	89	63326.3
6.16539	9.65545	11.4522	3.82377	30.97	48.3	With_Mealybug_3_20250621_134657	With mealybug	1.75049e+09	90	66197.8
6.91192	10.2308	12.076	5.49787	30.94	48.32	With_Mealybug_3_20250621_134657	With mealybug	1.75049e+09	91	74213.3
6.93221	10.0717	12.1767	4.54382	30.94	48.4	With_Mealybug_3_20250621_134657	With mealybug	1.75049e+09	92	74431.1
7.17683	10.2966	12.3637	4.96728	30.93	48.39	With_Mealybug_3_20250621_134657	With mealybug	1.75049e+09	93	77057.6
8.43289	11.1627	13.4621	5.53425	30.88	48.47	With_Mealybug_3_20250621_134657	With mealybug	1.75049e+09	94	90543.9
7.94619	10.6931	13.1008	4.56807	30.9	48.5	With_Mealybug_3_20250621_134657	With mealybug	1.75049e+09	95	85318.1
8.44557	11.0633	13.5251	4.93796	30.88	48.52	With_Mealybug_3_20250621_134657	With mealybug	1.75049e+09	96	90680
9.44687	11.784	13.3862	5.5585	30.84	48.57	With_Mealybug_3_20250621_134657	With mealybug	1.75049e+09	97	101431
9.7067	11.8897	14.6487	5.26642	30.83	48.62	With_Mealybug_3_20250621_134657	With mealybug	1.75049e+09	98	104221
9.72699	11.7307	14.7493	4.31236	30.83	48.7	With_Mealybug_3_20250621_134657	With mealybug	1.75049e+09	99	104439
11.2175	12.9011	14.9844	5.77982	30.77	48.73	With_Mealybug_3_20250621_134657	With mealybug	1.75049e+09	100	120443
-1.319	6.32088	6.2646	0.297041	31.08	48.23	With_Mealybug_4_20250621_135448	With mealybug	1.75049e+09	71	-14161.9
-1.0541	6.38677	6.55224	-0.233552	31.07	48.3	With_Mealybug_4_20250621_135448	With mealybug	1.75049e+09	72	-11317.6
-0.809479	5.61166	6.73922	0.189909	31.06	48.29	With_Mealybug_4_20250621_135448	With mealybug	1.75049e+09	73	-8691.39
0.431364	6.597	7.76217	1.47242	31.01	48.31	With_Mealybug_4_20250621_135448	With mealybug	1.75049e+09	74	4631.56
0.456724	6.39824	6.888	0.27985	31.01	48.41	With_Mealybug_4_20250621_135448	With mealybug	1.75049e+09	75	4903.99
0.20957	6.19322	6.68845	-0.0243543	31.02	48.41	With_Mealybug_4_20250621_135448	With mealybug	1.75049e+09	76	2250.29
0.466868	6.31874	6.93834	-0.197177	31.01	48.45	With_Mealybug_4_20250621_135448	With mealybug	1.75049e+09	77	5012.88
1.21847	6.85428	7.58734	0.238409	30.98	48.49	With_Mealybug_4_20250621_135448	With mealybug	1.75049e+09	78	13082.9
2.20202	7.71411	8.3604	1.69374	30.94	48.47	With_Mealybug_4_20250621_135448	With mealybug	1.75049e+09	79	23643.2
2.23245	7.4756	8.5114	0.262659	30.94	48.59	With_Mealybug_4_20250621_135448	With mealybug	1.75049e+09	80	23969.9
1.97899	8.0509	9.13524	0.936759	30.91	48.61	With_Mealybug_4_20250621_135448	With mealybug	1.75049e+09	81	21248.5
2.23375	8.19629	9.37255	0.883193	30.9	48.64	With_Mealybug_4_20250621_135448	With mealybug	1.75049e+09	82	23983.8
2.24389	8.11679	9.42288	0.406166	30.9	48.68	With_Mealybug_4_20250621_135448	With mealybug	1.75049e+09	83	24092.7
2.99803	7.63246	10.0845	0.722495	30.87	48.73	With_Mealybug_4_20250621_135448	With mealybug	1.75049e+09	84	32189.7
3.74711	8.18789	10.7209	1.27734	30.84	48.76	With_Mealybug_4_20250621_135448	With mealybug	1.75049e+09	85	40232.5
4.01201	8.25377	11.0085	0.746745	30.83	48.83	With_Mealybug_4_20250621_135448	With mealybug	1.75049e+09	86	43076.7
4.26931	8.37929	11.2584	0.573923	30.82	48.87	With_Mealybug_4_20250621_135448	With mealybug	1.75049e+09	87	45839.3
4.7763	8.68994	11.7205	0.586048	30.8	48.92	With_Mealybug_4_20250621_135448	With mealybug	1.75049e+09	88	51282.8
4.78898	8.59057	11.7834	-0.0102359	30.8	48.97	With_Mealybug_4_20250621_135448	With mealybug	1.75049e+09	89	51419
5.04374	8.73596	12.0207	-0.0638017	30.79	49	With_Mealybug_4_20250621_135448	With mealybug	1.75049e+09	90	54154.3
5.55834	9.98699	12.5205	-0.409447	30.77	49.08	With_Mealybug_4_20250621_135448	With mealybug	1.75049e+09	91	59679.7
6.05518	9.37714	12.9322	0.079705	30.75	49.09	With_Mealybug_4_20250621_135448	With mealybug	1.75049e+09	92	65014.1
6.80932	9.89282	13.5937	0.396034	30.72	49.14	With_Mealybug_4_20250621_135448	With mealybug	1.75049e+09	93	73111.4
6.56471	9.66793	13.4068	-0.0274267	30.73	49.15	With_Mealybug_4_20250621_135448	With mealybug	1.75049e+09	94	70484.9
7.57107	10.3489	14.2931	0.354593	30.69	49.22	With_Mealybug_4_20250621_135448	With mealybug	1.75049e+09	95	81290.2
8.33029	10.8248	14.9798	0.432409	30.66	49.29	With_Mealybug_4_20250621_135448	With mealybug	1.75049e+09	96	89441.9
8.33029	10.8248	14.9798	0.432409	30.66	49.29	With_Mealybug_4_20250621_135448	With mealybug	1.75049e+09	97	89441.9
8.5952	10.8907	15.2675	0.901817	30.65	49.36	With_Mealybug_4_20250621_135448	With mealybug	1.75049e+09	98	92286.2
9.33666	11.5057	15.8662	1.81443	30.62	49.36	With_Mealybug_4_20250621_135448	With mealybug	1.75049e+09	99	100247
9.84872	11.7766	16.3534	1.58804	30.6	49.43	With_Mealybug_4_20250621_135448	With mealybug	1.75049e+09	100	105745
-0.459643	5.28108	8.59356	-6.01595	31.04	48.6	With_Mealybug_5_20250621_140251	With mealybug	1.75049e+09	71	-4935.62
1.28943	5.83651	9.22998	-6.4611	31.01	48.63	With_Mealybug_5_20250621_140251	With mealybug	1.75049e+09	72	13844.2
1.06003	5.49236	9.1185	-7.6001	31.02	48.7	With_Mealybug_5_20250621_140251	With mealybug	1.75049e+09	73	11381
1.55941	5.86264	9.54279	-7.23021	31	48.72	With_Mealybug_5_20250621_140251	With mealybug	1.75049e+09	74	16742.9
2.05247	7.01325	10.7905	-5.88201	30.94	48.76	With_Mealybug_5_20250621_140251	With mealybug	1.75049e+09	75	22037
1.30848	6.41807	9.17921	-6.67537	30.97	48.75	With_Mealybug_5_20250621_140251	With mealybug	1.75049e+09	76	14048.8
1.81546	6.72872	9.64124	-5.66324	30.95	48.8	With_Mealybug_5_20250621_140251	With mealybug	1.75049e+09	77	19492.3
2.81422	7.46929	10.4898	-4.92345	30.91	48.84	With_Mealybug_5_20250621_140251	With mealybug	1.75049e+09	78	30216
3.07152	7.59481	10.7397	-5.09627	30.9	48.88	With_Mealybug_5_20250621_140251	With mealybug	1.75049e+09	79	32978.6
3.09435	7.41593	10.8529	-6.16958	30.9	48.97	With_Mealybug_5_20250621_140251	With mealybug	1.75049e+09	80	33223.6
3.59373	7.78621	11.2772	-5.79969	30.88	48.99	With_Mealybug_5_20250621_140251	With mealybug	1.75049e+09	81	38585.5
3.84849	6.9316	11.5145	-5.85325	30.87	49.02	With_Mealybug_5_20250621_140251	With mealybug	1.75049e+09	82	41320.6
4.60263	7.44727	12.1761	-5.53693	30.84	49.07	With_Mealybug_5_20250621_140251	With mealybug	1.75049e+09	83	49417.8
4.85993	7.57279	12.426	-5.70975	30.83	49.11	With_Mealybug_5_20250621_140251	With mealybug	1.75049e+09	84	52180.4
5.62422	8.00896	13.1379	-5.87045	30.8	49.2	With_Mealybug_5_20250621_140251	With mealybug	1.75049e+09	85	60386.5
5.87898	8.15435	13.3752	-5.92401	30.79	49.23	With_Mealybug_5_20250621_140251	With mealybug	1.75049e+09	86	63121.9
6.3809	8.50476	13.8121	-5.67337	30.77	49.26	With_Mealybug_5_20250621_140251	With mealybug	1.75049e+09	87	68511
6.64834	8.55077	14.1123	-6.32322	30.76	49.34	With_Mealybug_5_20250621_140251	With mealybug	1.75049e+09	88	71382.5
5.89296	8.77566	14.2993	-5.89976	30.75	49.33	With_Mealybug_5_20250621_140251	With mealybug	1.75049e+09	89	63271.9
5.91071	8.63653	14.3874	-6.73456	30.75	49.4	With_Mealybug_5_20250621_140251	With mealybug	1.75049e+09	90	63462.5
6.41263	8.98694	14.8242	-6.48392	30.73	49.43	With_Mealybug_5_20250621_140251	With mealybug	1.75049e+09	91	68851.6
6.67246	9.09258	15.0867	-6.776	30.72	49.48	With_Mealybug_5_20250621_140251	With mealybug	1.75049e+09	92	71641.4
7.42407	9.62813	15.7357	-6.34041	30.69	49.52	With_Mealybug_5_20250621_140251	With mealybug	1.75049e+09	93	79711.4
7.18198	9.38336	15.5613	-6.88313	30.7	49.54	With_Mealybug_5_20250621_140251	With mealybug	1.75049e+09	94	77112.1
8.43043	10.3091	15.622	-5.95839	30.65	49.59	With_Mealybug_5_20250621_140251	With mealybug	1.75049e+09	95	90516.9
8.43804	10.2494	16.6598	-6.31616	30.65	49.62	With_Mealybug_5_20250621_140251	With mealybug	1.75049e+09	96	90598.4
9.19219	10.7651	16.3214	-5.99983	30.62	49.67	With_Mealybug_5_20250621_140251	With mealybug	1.75049e+09	97	98695.8
9.71439	10.9565	16.8589	-6.70325	30.6	49.78	With_Mealybug_5_20250621_140251	With mealybug	1.75049e+09	98	104303
10.2138	11.3268	17.2832	-6.33335	30.58	49.8	With_Mealybug_5_20250621_140251	With mealybug	1.75049e+09	99	109665
10.2239	11.2473	17.3335	-6.81038	30.58	49.84	With_Mealybug_5_20250621_140251	With mealybug	1.75049e+09	100	109773
