# Supplementary material for: Utilizing E-nose for detection of mealybug infestation and ripeness of durian
Source: PeerJ. 2025 Aug 25;13:e19936. doi: 10.7717/peerj.19936 (PMC12393072; doi:10.7717/peerj.19936)
Supplement: Supplemental Information 4 [file peerj-13-19936-s004.xlsx]

## Sheet: enose_readings-_20250425_GT_fil
Color	GM102B_rel	GM302B_rel	GM502B_rel	GM702B_rel	temperature	humidity	treatment	timestamp	time	Day after harvest	Fruit	Treatment	Treatment_2	Treatment_3	Ripeness
Blue	-34.4928	-92.8948	-94.1477	-49.227	37.79	47.66	GT01_20250418_145236	1744962757	71	3	GT01	Indoor air, Durian	Indoor air, Durian, Day 3	Indoor air, Durian, Day 3	Before ripened	Indoor air, Durian, Before ripened
Blue	-33.3757	-87.4775	-88.6455	-47.6295	37.78	47.44	GT01_20250418_145236	1744962757	72	3	GT01	Indoor air, Durian	Indoor air, Durian, Day 3	Indoor air, Durian, Day 3	Before ripened	Indoor air, Durian, Before ripened
Blue	-32.8762	-80.1105	-81.1976	-45.8169	37.76	47.23	GT01_20250418_145236	1744962757	73	3	GT01	Indoor air, Durian	Indoor air, Durian, Day 3	Indoor air, Durian, Day 3	Before ripened	Indoor air, Durian, Before ripened
Blue	-31.9508	-75.1196	-76.1449	-44.58	37.75	47.07	GT01_20250418_145236	1744962757	74	3	GT01	Indoor air, Durian	Indoor air, Durian, Day 3	Indoor air, Durian, Day 3	Before ripened	Indoor air, Durian, Before ripened
Blue	-32.5994	-72.5047	-75.4874	-44.9188	37.75	46.96	GT01_20250418_145236	1744962757	75	3	GT01	Indoor air, Durian	Indoor air, Durian, Day 3	Indoor air, Durian, Day 3	Before ripened	Indoor air, Durian, Before ripened
Blue	-32.3119	-71.3653	-73.3131	-44.3778	37.75	46.87	GT01_20250418_145236	1744962757	76	3	GT01	Indoor air, Durian	Indoor air, Durian, Day 3	Indoor air, Durian, Day 3	Before ripened	Indoor air, Durian, Before ripened
Blue	-32.1522	-71.1767	-72.1051	-44.0772	37.75	46.82	GT01_20250418_145236	1744962757	77	3	GT01	Indoor air, Durian	Indoor air, Durian, Day 3	Indoor air, Durian, Day 3	Before ripened	Indoor air, Durian, Before ripened
Blue	-32.1646	-69.5159	-70.4761	-43.7327	37.72	46.9	GT01_20250418_145236	1744962757	78	3	GT01	Indoor air, Durian	Indoor air, Durian, Day 3	Indoor air, Durian, Day 3	Before ripened	Indoor air, Durian, Before ripened
Blue	-32.2293	-71.8941	-73.9127	-44.3592	37.71	47.05	GT01_20250418_145236	1744962757	79	3	GT01	Indoor air, Durian	Indoor air, Durian, Day 3	Indoor air, Durian, Day 3	Before ripened	Indoor air, Durian, Before ripened
Blue	-32.932	-78.1238	-79.2277	-45.6817	37.71	47.27	GT01_20250418_145236	1744962757	80	3	GT01	Indoor air, Durian	Indoor air, Durian, Day 3	Indoor air, Durian, Day 3	Before ripened	Indoor air, Durian, Before ripened
Blue	-31.1795	-74.5634	-75.7073	-44.9071	37.66	47.37	GT01_20250418_145236	1744962757	81	3	GT01	Indoor air, Durian	Indoor air, Durian, Day 3	Indoor air, Durian, Day 3	Before ripened	Indoor air, Durian, Before ripened
Blue	-33.7429	-82.4059	-83.6384	-46.8399	37.68	47.6	GT01_20250418_145236	1744962757	82	3	GT01	Indoor air, Durian	Indoor air, Durian, Day 3	Indoor air, Durian, Day 3	Before ripened	Indoor air, Durian, Before ripened
Blue	-33.4891	-84.3097	-85.6125	-47.3716	37.66	47.78	GT01_20250418_145236	1744962757	83	3	GT01	Indoor air, Durian	Indoor air, Durian, Day 3	Indoor air, Durian, Day 3	Before ripened	Indoor air, Durian, Before ripened
Blue	-33.3941	-85.4993	-86.8411	-47.6976	37.65	47.88	GT01_20250418_145236	1744962757	84	3	GT01	Indoor air, Durian	Indoor air, Durian, Day 3	Indoor air, Durian, Day 3	Before ripened	Indoor air, Durian, Before ripened
Blue	-32.2787	-82.8877	-84.2458	-46.1126	37.62	47.92	GT01_20250418_145236	1744962757	85	3	GT01	Indoor air, Durian	Indoor air, Durian, Day 3	Indoor air, Durian, Day 3	Before ripened	Indoor air, Durian, Before ripened
Blue	-33.3949	-87.4021	-89.7946	-47.2039	37.64	48.01	GT01_20250418_145236	1744962757	86	3	GT01	Indoor air, Durian	Indoor air, Durian, Day 3	Indoor air, Durian, Day 3	Before ripened	Indoor air, Durian, Before ripened
Blue	-31.7693	-83.8898	-85.2871	-46.1635	37.6	48.02	GT01_20250418_145236	1744962757	87	3	GT01	Indoor air, Durian	Indoor air, Durian, Day 3	Indoor air, Durian, Day 3	Before ripened	Indoor air, Durian, Before ripened
Blue	-31.8324	-82.4624	-83.8169	-46.7774	37.61	47.91	GT01_20250418_145236	1744962757	88	3	GT01	Indoor air, Durian	Indoor air, Durian, Day 3	Indoor air, Durian, Day 3	Before ripened	Indoor air, Durian, Before ripened
Blue	-29.9823	-74.3833	-76.6649	-44.8099	37.58	47.72	GT01_20250418_145236	1744962757	89	3	GT01	Indoor air, Durian	Indoor air, Durian, Day 3	Indoor air, Durian, Day 3	Before ripened	Indoor air, Durian, Before ripened
Blue	-29.0249	-70.1546	-71.3707	-43.5129	37.57	47.55	GT01_20250418_145236	1744962757	90	3	GT01	Indoor air, Durian	Indoor air, Durian, Day 3	Indoor air, Durian, Day 3	Before ripened	Indoor air, Durian, Before ripened
Blue	-29.7694	-68.2529	-70.4379	-43.032	37.57	47.47	GT01_20250418_145236	1744962757	91	3	GT01	Indoor air, Durian	Indoor air, Durian, Day 3	Indoor air, Durian, Day 3	Before ripened	Indoor air, Durian, Before ripened
Blue	-28.2388	-62.5509	-64.7019	-41.6656	37.54	47.38	GT01_20250418_145236	1744962757	92	3	GT01	Indoor air, Durian	Indoor air, Durian, Day 3	Indoor air, Durian, Day 3	Before ripened	Indoor air, Durian, Before ripened
Blue	-27.6647	-61.1749	-63.3067	-41.0899	37.53	47.33	GT01_20250418_145236	1744962757	93	3	GT01	Indoor air, Durian	Indoor air, Durian, Day 3	Indoor air, Durian, Day 3	Before ripened	Indoor air, Durian, Before ripened
Blue	-27.505	-59.9863	-62.0987	-40.7894	37.53	47.28	GT01_20250418_145236	1744962757	94	3	GT01	Indoor air, Durian	Indoor air, Durian, Day 3	Indoor air, Durian, Day 3	Before ripened	Indoor air, Durian, Before ripened
Blue	-26.8039	-59.5621	-60.6906	-40.4795	37.51	47.32	GT01_20250418_145236	1744962757	95	3	GT01	Indoor air, Durian	Indoor air, Durian, Day 3	Indoor air, Durian, Day 3	Before ripened	Indoor air, Durian, Before ripened
Blue	-25.4338	-56.9515	-59.1159	-39.92	37.47	47.41	GT01_20250418_145236	1744962757	96	3	GT01	Indoor air, Durian	Indoor air, Durian, Day 3	Indoor air, Durian, Day 3	Before ripened	Indoor air, Durian, Before ripened
Blue	-26.1996	-60.7539	-62.9606	-40.8563	37.48	47.52	GT01_20250418_145236	1744962757	97	3	GT01	Indoor air, Durian	Indoor air, Durian, Day 3	Indoor air, Durian, Day 3	Before ripened	Indoor air, Durian, Before ripened
Blue	-26.6591	-63.4211	-64.7138	-41.3534	37.45	47.74	GT01_20250418_145236	1744962757	98	3	GT01	Indoor air, Durian	Indoor air, Durian, Day 3	Indoor air, Durian, Day 3	Before ripened	Indoor air, Durian, Before ripened
Blue	-25.9909	-64.1374	-65.5007	-41.61	37.42	47.92	GT01_20250418_145236	1744962757	99	3	GT01	Indoor air, Durian	Indoor air, Durian, Day 3	Indoor air, Durian, Day 3	Before ripened	Indoor air, Durian, Before ripened
Blue	-26.3431	-68.6551	-71.1116	-42.7775	37.41	48.16	GT01_20250418_145236	1744962757	100	3	GT01	Indoor air, Durian	Indoor air, Durian, Day 3	Indoor air, Durian, Day 3	Before ripened	Indoor air, Durian, Before ripened
Red	-25.0722	-81.3687	-88.0754	-20.4235	36.88	52.67	GT01_20250419_100544	1745031944	71	4	GT01	Indoor air, Durian, Mealybug	Indoor air, Durian, Mealybug, Day 4	Indoor air, Durian, Mealybug, Day 4-5	Before ripened	Indoor air, Durian, Mealybug, Before ripened
Red	-24.3278	-84.2704	-90.0081	-20.9043	36.88	52.75	GT01_20250419_100544	1745031944	72	4	GT01	Indoor air, Durian, Mealybug	Indoor air, Durian, Mealybug, Day 4	Indoor air, Durian, Mealybug, Day 4-5	Before ripened	Indoor air, Durian, Mealybug, Before ripened
Red	-23.9125	-81.1801	-86.8674	-20.1229	36.88	52.62	GT01_20250419_100544	1745031944	73	4	GT01	Indoor air, Durian, Mealybug	Indoor air, Durian, Mealybug, Day 4	Indoor air, Durian, Mealybug, Day 4-5	Before ripened	Indoor air, Durian, Mealybug, Before ripened
Red	-22.0944	-73.3387	-79.957	-19.2155	36.85	52.44	GT01_20250419_100544	1745031944	74	4	GT01	Indoor air, Durian, Mealybug	Indoor air, Durian, Mealybug, Day 4	Indoor air, Durian, Mealybug, Day 4-5	Before ripened	Indoor air, Durian, Mealybug, Before ripened
Red	-22.0101	-70.062	-76.6498	-18.1844	36.83	52.36	GT01_20250419_100544	1745031944	75	4	GT01	Indoor air, Durian, Mealybug	Indoor air, Durian, Mealybug, Day 4	Indoor air, Durian, Mealybug, Day 4-5	Before ripened	Indoor air, Durian, Mealybug, Before ripened
Red	-22.9143	-69.3488	-75.925	-18.004	36.83	52.33	GT01_20250419_100544	1745031944	76	4	GT01	Indoor air, Durian, Mealybug	Indoor air, Durian, Mealybug, Day 4	Indoor air, Durian, Mealybug, Day 4-5	Before ripened	Indoor air, Durian, Mealybug, Before ripened
Red	-21.2248	-65.3611	-70.9344	-16.8434	36.79	52.32	GT01_20250419_100544	1745031944	77	4	GT01	Indoor air, Durian, Mealybug	Indoor air, Durian, Mealybug, Day 4	Indoor air, Durian, Mealybug, Day 4-5	Before ripened	Indoor air, Durian, Mealybug, Before ripened
Red	-20.8104	-64.1736	-69.7472	-16.5683	36.78	52.32	GT01_20250419_100544	1745031944	78	4	GT01	Indoor air, Durian, Mealybug	Indoor air, Durian, Mealybug, Day 4	Indoor air, Durian, Mealybug, Day 4-5	Before ripened	Indoor air, Durian, Mealybug, Before ripened
Red	-19.9186	-63.2259	-69.8429	-17.4041	36.75	52.43	GT01_20250419_100544	1745031944	79	4	GT01	Indoor air, Durian, Mealybug	Indoor air, Durian, Mealybug, Day 4	Indoor air, Durian, Mealybug, Day 4-5	Before ripened	Indoor air, Durian, Mealybug, Before ripened
Red	-20.0144	-63.939	-70.5677	-17.5844	36.75	52.46	GT01_20250419_100544	1745031944	80	4	GT01	Indoor air, Durian, Mealybug	Indoor air, Durian, Mealybug, Day 4	Indoor air, Durian, Mealybug, Day 4-5	Before ripened	Indoor air, Durian, Mealybug, Before ripened
Red	-19.9833	-65.6041	-73.2795	-17.0306	36.74	52.58	GT01_20250419_100544	1745031944	81	4	GT01	Indoor air, Durian, Mealybug	Indoor air, Durian, Mealybug, Day 4	Indoor air, Durian, Mealybug, Day 4-5	Before ripened	Indoor air, Durian, Mealybug, Before ripened
Red	-19.804	-63.517	-70.2009	-16.3254	36.71	52.6	GT01_20250419_100544	1745031944	82	4	GT01	Indoor air, Durian, Mealybug	Indoor air, Durian, Mealybug, Day 4	Indoor air, Durian, Mealybug, Day 4-5	Before ripened	Indoor air, Durian, Mealybug, Before ripened
Red	-19.709	-64.7066	-72.4296	-17.6514	36.7	52.7	GT01_20250419_100544	1745031944	83	4	GT01	Indoor air, Durian, Mealybug	Indoor air, Durian, Mealybug, Day 4	Indoor air, Durian, Mealybug, Day 4-5	Before ripened	Indoor air, Durian, Mealybug, Before ripened
Red	-19.4233	-67.3727	-74.1621	-17.123	36.68	52.87	GT01_20250419_100544	1745031944	84	4	GT01	Indoor air, Durian, Mealybug	Indoor air, Durian, Mealybug, Day 4	Indoor air, Durian, Mealybug, Day 4-5	Before ripened	Indoor air, Durian, Mealybug, Before ripened
Red	-19.1047	-66.8984	-73.6996	-18.0282	36.67	52.9	GT01_20250419_100544	1745031944	85	4	GT01	Indoor air, Durian, Mealybug	Indoor air, Durian, Mealybug, Day 4	Indoor air, Durian, Mealybug, Day 4-5	Before ripened	Indoor air, Durian, Mealybug, Before ripened
Red	-18.5314	-67.4251	-73.2578	-17.9588	36.65	52.98	GT01_20250419_100544	1745031944	86	4	GT01	Indoor air, Durian, Mealybug	Indoor air, Durian, Mealybug, Day 4	Indoor air, Durian, Mealybug, Day 4-5	Before ripened	Indoor air, Durian, Mealybug, Before ripened
Red	-18.086	-67.9026	-73.7824	-18.1299	36.63	53.1	GT01_20250419_100544	1745031944	87	4	GT01	Indoor air, Durian, Mealybug	Indoor air, Durian, Mealybug, Day 4	Indoor air, Durian, Mealybug, Day 4-5	Before ripened	Indoor air, Durian, Mealybug, Before ripened
Red	-17.8321	-69.8065	-76.7565	-17.6616	36.61	53.28	GT01_20250419_100544	1745031944	88	4	GT01	Indoor air, Durian, Mealybug	Indoor air, Durian, Mealybug, Day 4	Indoor air, Durian, Mealybug, Day 4-5	Before ripened	Indoor air, Durian, Mealybug, Before ripened
Red	-19.14	-75.7472	-82.7549	-19.1135	36.63	53.43	GT01_20250419_100544	1745031944	89	4	GT01	Indoor air, Durian, Mealybug	Indoor air, Durian, Mealybug, Day 4	Indoor air, Durian, Mealybug, Day 4-5	Before ripened	Indoor air, Durian, Mealybug, Before ripened
Red	-16.5898	-69.1467	-75.1482	-17.3425	36.57	53.41	GT01_20250419_100544	1745031944	90	4	GT01	Indoor air, Durian, Mealybug	Indoor air, Durian, Mealybug, Day 4	Indoor air, Durian, Mealybug, Day 4-5	Before ripened	Indoor air, Durian, Mealybug, Before ripened
Red	-16.1426	-65.8187	-72.7659	-16.5009	36.57	53.27	GT01_20250419_100544	1745031944	91	4	GT01	Indoor air, Durian, Mealybug	Indoor air, Durian, Mealybug, Day 4	Indoor air, Durian, Mealybug, Day 4-5	Before ripened	Indoor air, Durian, Mealybug, Before ripened
Red	-15.8232	-64.4416	-71.35	-15.8998	36.57	53.17	GT01_20250419_100544	1745031944	92	4	GT01	Indoor air, Durian, Mealybug	Indoor air, Durian, Mealybug, Day 4	Indoor air, Durian, Mealybug, Day 4-5	Before ripened	Indoor air, Durian, Mealybug, Before ripened
Red	-14.8347	-60.878	-67.7676	-16.049	36.55	53.12	GT01_20250419_100544	1745031944	93	4	GT01	Indoor air, Durian, Mealybug	Indoor air, Durian, Mealybug, Day 4	Indoor air, Durian, Mealybug, Day 4-5	Before ripened	Indoor air, Durian, Mealybug, Before ripened
Red	-14.4842	-60.1659	-68.0635	-15.8941	36.54	53.14	GT01_20250419_100544	1745031944	94	4	GT01	Indoor air, Durian, Mealybug	Indoor air, Durian, Mealybug, Day 4	Indoor air, Durian, Mealybug, Day 4-5	Before ripened	Indoor air, Durian, Mealybug, Before ripened
Red	-13.572	-56.4169	-63.3352	-14.819	36.49	53.19	GT01_20250419_100544	1745031944	95	4	GT01	Indoor air, Durian, Mealybug	Indoor air, Durian, Mealybug, Day 4	Indoor air, Durian, Mealybug, Day 4-5	Before ripened	Indoor air, Durian, Mealybug, Before ripened
Red	-13.3492	-56.6557	-63.5975	-14.9045	36.48	53.25	GT01_20250419_100544	1745031944	96	4	GT01	Indoor air, Durian, Mealybug	Indoor air, Durian, Mealybug, Day 4	Indoor air, Durian, Mealybug, Day 4-5	Before ripened	Indoor air, Durian, Mealybug, Before ripened
Red	-13.5089	-57.8442	-64.8054	-15.2051	36.48	53.3	GT01_20250419_100544	1745031944	97	4	GT01	Indoor air, Durian, Mealybug	Indoor air, Durian, Mealybug, Day 4	Indoor air, Durian, Mealybug, Day 4-5	Before ripened	Indoor air, Durian, Mealybug, Before ripened
Red	-13.8283	-60.2214	-68.2213	-15.8062	36.48	53.4	GT01_20250419_100544	1745031944	98	4	GT01	Indoor air, Durian, Mealybug	Indoor air, Durian, Mealybug, Day 4	Indoor air, Durian, Mealybug, Day 4-5	Before ripened	Indoor air, Durian, Mealybug, Before ripened
Red	-12.9365	-60.2737	-67.3171	-15.642	36.45	53.51	GT01_20250419_100544	1745031944	99	4	GT01	Indoor air, Durian, Mealybug	Indoor air, Durian, Mealybug, Day 4	Indoor air, Durian, Mealybug, Day 4-5	Before ripened	Indoor air, Durian, Mealybug, Before ripened
Red	-11.4706	-56.9499	-64.0176	-14.9021	36.41	53.57	GT01_20250419_100544	1745031944	100	4	GT01	Indoor air, Durian, Mealybug	Indoor air, Durian, Mealybug, Day 4	Indoor air, Durian, Mealybug, Day 4-5	Before ripened	Indoor air, Durian, Mealybug, Before ripened
Red	-51.8237	-122.753	-127.471	-4.13143	35.17	58.38	GT01_20250420_095320	1745117600	71	5	GT01	Indoor air, Durian, Mealybug	Indoor air, Durian, Mealybug, Day 5	Indoor air, Durian, Mealybug, Day 4-5	Before ripened	Indoor air, Durian, Mealybug, Before ripened
Red	-51.515	-114.91	-120.519	-4.17321	35.16	58.1	GT01_20250420_095320	1745117600	72	5	GT01	Indoor air, Durian, Mealybug	Indoor air, Durian, Mealybug, Day 5	Indoor air, Durian, Mealybug, Day 4-5	Before ripened	Indoor air, Durian, Mealybug, Before ripened
Red	-52.0989	-110.917	-116.425	-4.88548	35.17	57.84	GT01_20250420_095320	1745117600	73	5	GT01	Indoor air, Durian, Mealybug	Indoor air, Durian, Mealybug, Day 5	Indoor air, Durian, Mealybug, Day 4-5	Before ripened	Indoor air, Durian, Mealybug, Before ripened
Red	-52.6198	-108.351	-113.801	-6.98383	35.17	57.69	GT01_20250420_095320	1745117600	74	5	GT01	Indoor air, Durian, Mealybug	Indoor air, Durian, Mealybug, Day 5	Indoor air, Durian, Mealybug, Day 4-5	Before ripened	Indoor air, Durian, Mealybug, Before ripened
Red	-52.1095	-107.45	-112.889	-9.52837	35.16	57.66	GT01_20250420_095320	1745117600	75	5	GT01	Indoor air, Durian, Mealybug	Indoor air, Durian, Mealybug, Day 5	Indoor air, Durian, Mealybug, Day 4-5	Before ripened	Indoor air, Durian, Mealybug, Before ripened
Red	-52.1734	-107.926	-114.372	-9.64859	35.16	57.68	GT01_20250420_095320	1745117600	76	5	GT01	Indoor air, Durian, Mealybug	Indoor air, Durian, Mealybug, Day 5	Indoor air, Durian, Mealybug, Day 4-5	Before ripened	Indoor air, Durian, Mealybug, Before ripened
Red	-51.9507	-109.165	-114.635	-9.73411	35.15	57.74	GT01_20250420_095320	1745117600	77	5	GT01	Indoor air, Durian, Mealybug	Indoor air, Durian, Mealybug, Day 5	Indoor air, Durian, Mealybug, Day 4-5	Before ripened	Indoor air, Durian, Mealybug, Before ripened
Red	-52.8122	-113.68	-120.204	-10.8508	35.16	57.88	GT01_20250420_095320	1745117600	78	5	GT01	Indoor air, Durian, Mealybug	Indoor air, Durian, Mealybug, Day 5	Indoor air, Durian, Mealybug, Day 4-5	Before ripened	Indoor air, Durian, Mealybug, Before ripened
Red	-53.2914	-117.246	-123.828	-10.7524	35.16	58.03	GT01_20250420_095320	1745117600	79	5	GT01	Indoor air, Durian, Mealybug	Indoor air, Durian, Mealybug, Day 5	Indoor air, Durian, Mealybug, Day 4-5	Before ripened	Indoor air, Durian, Mealybug, Before ripened
Red	-52.4634	-117.774	-123.407	-9.70847	35.13	58.16	GT01_20250420_095320	1745117600	80	5	GT01	Indoor air, Durian, Mealybug	Indoor air, Durian, Mealybug, Day 5	Indoor air, Durian, Mealybug, Day 4-5	Before ripened	Indoor air, Durian, Mealybug, Before ripened
Red	-52.3365	-119.726	-125.394	-8.97433	35.12	58.25	GT01_20250420_095320	1745117600	81	5	GT01	Indoor air, Durian, Mealybug	Indoor air, Durian, Mealybug, Day 5	Indoor air, Durian, Mealybug, Day 4-5	Before ripened	Indoor air, Durian, Mealybug, Before ripened
Red	-52.9753	-124.48	-130.226	-9.17654	35.12	58.45	GT01_20250420_095320	1745117600	82	5	GT01	Indoor air, Durian, Mealybug	Indoor air, Durian, Mealybug, Day 5	Indoor air, Durian, Mealybug, Day 4-5	Before ripened	Indoor air, Durian, Mealybug, Before ripened
Red	-53.0835	-123.532	-130.321	-8.01235	35.09	58.56	GT01_20250420_095320	1745117600	83	5	GT01	Indoor air, Durian, Mealybug	Indoor air, Durian, Mealybug, Day 5	Indoor air, Durian, Mealybug, Day 4-5	Before ripened	Indoor air, Durian, Mealybug, Before ripened
Red	-54.8377	-131.898	-137.749	-8.79951	35.12	58.72	GT01_20250420_095320	1745117600	84	5	GT01	Indoor air, Durian, Mealybug	Indoor air, Durian, Mealybug, Day 5	Indoor air, Durian, Mealybug, Day 4-5	Before ripened	Indoor air, Durian, Mealybug, Before ripened
Red	-54.8377	-131.898	-137.749	-6.79951	35.12	58.72	GT01_20250420_095320	1745117600	85	5	GT01	Indoor air, Durian, Mealybug	Indoor air, Durian, Mealybug, Day 5	Indoor air, Durian, Mealybug, Day 4-5	Before ripened	Indoor air, Durian, Mealybug, Before ripened
Red	-54.3284	-131.9	-137.79	-6.85034	35.1	58.82	GT01_20250420_095320	1745117600	86	5	GT01	Indoor air, Durian, Mealybug	Indoor air, Durian, Mealybug, Day 5	Indoor air, Durian, Mealybug, Day 4-5	Before ripened	Indoor air, Durian, Mealybug, Before ripened
Red	-54.371	-126.672	-132.496	-5.55334	35.09	58.65	GT01_20250420_095320	1745117600	87	5	GT01	Indoor air, Durian, Mealybug	Indoor air, Durian, Mealybug, Day 5	Indoor air, Durian, Mealybug, Day 4-5	Before ripened	Indoor air, Durian, Mealybug, Before ripened
Red	-53.6363	-122.204	-127.939	-4.17081	35.09	58.42	GT01_20250420_095320	1745117600	88	5	GT01	Indoor air, Durian, Mealybug	Indoor air, Durian, Mealybug, Day 5	Indoor air, Durian, Mealybug, Day 4-5	Before ripened	Indoor air, Durian, Mealybug, Before ripened
Red	-52.5192	-116.787	-122.437	-4.57325	35.08	58.2	GT01_20250420_095320	1745117600	89	5	GT01	Indoor air, Durian, Mealybug	Indoor air, Durian, Mealybug, Day 5	Indoor air, Durian, Mealybug, Day 4-5	Before ripened	Indoor air, Durian, Mealybug, Before ripened
Red	-53.9443	-113.508	-120.088	-6.49127	35.08	58.02	GT01_20250420_095320	1745117600	90	5	GT01	Indoor air, Durian, Mealybug	Indoor air, Durian, Mealybug, Day 5	Indoor air, Durian, Mealybug, Day 4-5	Before ripened	Indoor air, Durian, Mealybug, Before ripened
Red	-53.3817	-107.568	-114.111	-7.06477	35.05	57.92	GT01_20250420_095320	1745117600	91	5	GT01	Indoor air, Durian, Mealybug	Indoor air, Durian, Mealybug, Day 5	Indoor air, Durian, Mealybug, Day 4-5	Before ripened	Indoor air, Durian, Mealybug, Before ripened
Red	-53.86	-110.231	-116.781	-9.46012	35.06	57.94	GT01_20250420_095320	1745117600	92	5	GT01	Indoor air, Durian, Mealybug	Indoor air, Durian, Mealybug, Day 5	Indoor air, Durian, Mealybug, Day 4-5	Before ripened	Indoor air, Durian, Mealybug, Before ripened
Red	-53.4456	-110.044	-116.594	-9.18499	35.05	57.94	GT01_20250420_095320	1745117600	93	5	GT01	Indoor air, Durian, Mealybug	Indoor air, Durian, Mealybug, Day 5	Indoor air, Durian, Mealybug, Day 4-5	Before ripened	Indoor air, Durian, Mealybug, Before ripened
Red	-53.064	-110.997	-117.602	-9.47626	35.03	58.08	GT01_20250420_095320	1745117600	94	5	GT01	Indoor air, Durian, Mealybug	Indoor air, Durian, Mealybug, Day 5	Indoor air, Durian, Mealybug, Day 4-5	Before ripened	Indoor air, Durian, Mealybug, Before ripened
Red	-52.8413	-111.236	-117.864	-9.56179	35.02	58.14	GT01_20250420_095320	1745117600	95	5	GT01	Indoor air, Durian, Mealybug	Indoor air, Durian, Mealybug, Day 5	Indoor air, Durian, Mealybug, Day 4-5	Before ripened	Indoor air, Durian, Mealybug, Before ripened
Red	-53.4801	-116.99	-123.696	-7.76399	35.02	58.34	GT01_20250420_095320	1745117600	96	5	GT01	Indoor air, Durian, Mealybug	Indoor air, Durian, Mealybug, Day 5	Indoor air, Durian, Mealybug, Day 4-5	Before ripened	Indoor air, Durian, Mealybug, Before ripened
Red	-55.3621	-125.307	-132.089	-8.7916	35.05	58.54	GT01_20250420_095320	1745117600	97	5	GT01	Indoor air, Durian, Mealybug	Indoor air, Durian, Mealybug, Day 5	Indoor air, Durian, Mealybug, Day 4-5	Before ripened	Indoor air, Durian, Mealybug, Before ripened
Red	-53.291	-122.272	-129.106	-6.92223	34.99	58.67	GT01_20250420_095320	1745117600	98	5	GT01	Indoor air, Durian, Mealybug	Indoor air, Durian, Mealybug, Day 5	Indoor air, Durian, Mealybug, Day 4-5	Before ripened	Indoor air, Durian, Mealybug, Before ripened
Red	-54.1206	-126.55	-133.434	-6.97879	35	58.8	GT01_20250420_095320	1745117600	99	5	GT01	Indoor air, Durian, Mealybug	Indoor air, Durian, Mealybug, Day 5	Indoor air, Durian, Mealybug, Day 4-5	Before ripened	Indoor air, Durian, Mealybug, Before ripened
Red	-53.6112	-126.552	-133.476	-5.02963	34.98	58.9	GT01_20250420_095320	1745117600	100	5	GT01	Indoor air, Durian, Mealybug	Indoor air, Durian, Mealybug, Day 5	Indoor air, Durian, Mealybug, Day 4-5	Before ripened	Indoor air, Durian, Mealybug, Before ripened
Red	-30.1866	-87.1679	-80.6966	89.1896	36.81	53.01	GT01_20250421_085853	1.7452e+09	71	6	GT01	Indoor air, Durian, Mealybug	Indoor air, Durian, Mealybug, Day 6	Indoor air, Durian, Mealybug, Day 6-7	Ripened	Indoor air, Durian, Mealybug, Ripened
Red	-30.751	-81.2763	-74.7319	82.882	36.79	52.82	GT01_20250421_085853	1.7452e+09	72	6	GT01	Indoor air, Durian, Mealybug	Indoor air, Durian, Mealybug, Day 6	Indoor air, Durian, Mealybug, Day 6-7	Ripened	Indoor air, Durian, Mealybug, Ripened
Red	-32.3562	-81.9873	-75.4153	77.7525	36.81	52.75	GT01_20250421_085853	1.7452e+09	73	6	GT01	Indoor air, Durian, Mealybug	Indoor air, Durian, Mealybug, Day 6	Indoor air, Durian, Mealybug, Day 6-7	Ripened	Indoor air, Durian, Mealybug, Ripened
Red	-31.1769	-79.9002	-73.3367	77.4577	36.78	52.77	GT01_20250421_085853	1.7452e+09	74	6	GT01	Indoor air, Durian, Mealybug	Indoor air, Durian, Mealybug, Day 6	Indoor air, Durian, Mealybug, Day 6-7	Ripened	Indoor air, Durian, Mealybug, Ripened
Red	-31.8468	-82.9894	-76.4567	76.7017	36.79	52.85	GT01_20250421_085853	1.7452e+09	75	6	GT01	Indoor air, Durian, Mealybug	Indoor air, Durian, Mealybug, Day 6	Indoor air, Durian, Mealybug, Day 6-7	Ripened	Indoor air, Durian, Mealybug, Ripened
Red	-32.0393	-86.3185	-79.8596	75.8347	36.78	53.04	GT01_20250421_085853	1.7452e+09	76	6	GT01	Indoor air, Durian, Mealybug	Indoor air, Durian, Mealybug, Day 6	Indoor air, Durian, Mealybug, Day 6-7	Ripened	Indoor air, Durian, Mealybug, Ripened
Red	-32.5184	-89.8842	-83.4835	78.933	36.78	53.19	GT01_20250421_085853	1.7452e+09	77	6	GT01	Indoor air, Durian, Mealybug	Indoor air, Durian, Mealybug, Day 6	Indoor air, Durian, Mealybug, Day 6-7	Ripened	Indoor air, Durian, Mealybug, Ripened
Red	-32.4243	-92.9766	-86.6655	82.1008	36.76	53.42	GT01_20250421_085853	1.7452e+09	78	6	GT01	Indoor air, Durian, Mealybug	Indoor air, Durian, Mealybug, Day 6	Indoor air, Durian, Mealybug, Day 6-7	Ripened	Indoor air, Durian, Mealybug, Ripened
Red	-32.9673	-98.0178	-90.7726	87.0789	36.76	53.59	GT01_20250421_085853	1.7452e+09	79	6	GT01	Indoor air, Durian, Mealybug	Indoor air, Durian, Mealybug, Day 6	Indoor air, Durian, Mealybug, Day 6-7	Ripened	Indoor air, Durian, Mealybug, Ripened
Red	-32.032	-100.396	-92.2092	90.4524	36.75	53.74	GT01_20250421_085853	1.7452e+09	80	6	GT01	Indoor air, Durian, Mealybug	Indoor air, Durian, Mealybug, Day 6	Indoor air, Durian, Mealybug, Day 6-7	Ripened	Indoor air, Durian, Mealybug, Ripened
Red	-31.5431	-104.199	-96.0746	94.4906	36.75	53.9	GT01_20250421_085853	1.7452e+09	81	6	GT01	Indoor air, Durian, Mealybug	Indoor air, Durian, Mealybug, Day 6	Indoor air, Durian, Mealybug, Day 6-7	Ripened	Indoor air, Durian, Mealybug, Ripened
Red	-31.7028	-105.388	-97.2826	95.1901	36.75	53.95	GT01_20250421_085853	1.7452e+09	82	6	GT01	Indoor air, Durian, Mealybug	Indoor air, Durian, Mealybug, Day 6	Indoor air, Durian, Mealybug, Day 6-7	Ripened	Indoor air, Durian, Mealybug, Ripened
Red	-31.9583	-106.29	-99.2153	98.7092	36.75	54.03	GT01_20250421_085853	1.7452e+09	83	6	GT01	Indoor air, Durian, Mealybug	Indoor air, Durian, Mealybug, Day 6	Indoor air, Durian, Mealybug, Day 6-7	Ripened	Indoor air, Durian, Mealybug, Ripened
Red	-30.811	-103.44	-96.3783	99.3543	36.72	54.06	GT01_20250421_085853	1.7452e+09	84	6	GT01	Indoor air, Durian, Mealybug	Indoor air, Durian, Mealybug, Day 6	Indoor air, Durian, Mealybug, Day 6-7	Ripened	Indoor air, Durian, Mealybug, Ripened
Red	-29.8536	-99.2117	-91.084	100.651	36.71	53.89	GT01_20250421_085853	1.7452e+09	85	6	GT01	Indoor air, Durian, Mealybug	Indoor air, Durian, Mealybug, Day 6	Indoor air, Durian, Mealybug, Day 6-7	Ripened	Indoor air, Durian, Mealybug, Ripened
Red	-30.3097	-93.2677	-85.0236	98.1794	36.72	53.59	GT01_20250421_085853	1.7452e+09	86	6	GT01	Indoor air, Durian, Mealybug	Indoor air, Durian, Mealybug, Day 6	Indoor air, Durian, Mealybug, Day 6-7	Ripened	Indoor air, Durian, Mealybug, Ripened
Red	-31.5431	-87.5626	-80.2254	89.6221	36.72	53.35	GT01_20250421_085853	1.7452e+09	87	6	GT01	Indoor air, Durian, Mealybug	Indoor air, Durian, Mealybug, Day 6	Indoor air, Durian, Mealybug, Day 6-7	Ripened	Indoor air, Durian, Mealybug, Ripened
Red	-32.2672	-82.8595	-74.4686	84.0139	36.7	53.21	GT01_20250421_085853	1.7452e+09	88	6	GT01	Indoor air, Durian, Mealybug	Indoor air, Durian, Mealybug, Day 6	Indoor air, Durian, Mealybug, Day 6-7	Ripened	Indoor air, Durian, Mealybug, Ripened
Red	-32.5866	-85.2367	-76.8845	81.4128	36.7	53.31	GT01_20250421_085853	1.7452e+09	89	6	GT01	Indoor air, Durian, Mealybug	Indoor air, Durian, Mealybug, Day 6	Indoor air, Durian, Mealybug, Day 6-7	Ripened	Indoor air, Durian, Mealybug, Ripened
Red	-31.5351	-84.1004	-75.7723	81.8775	36.67	53.37	GT01_20250421_085853	1.7452e+09	90	6	GT01	Indoor air, Durian, Mealybug	Indoor air, Durian, Mealybug, Day 6	Indoor air, Durian, Mealybug, Day 6-7	Ripened	Indoor air, Durian, Mealybug, Ripened
Red	-31.6309	-84.8136	-76.4971	81.6972	36.67	53.4	GT01_20250421_085853	1.7452e+09	91	6	GT01	Indoor air, Durian, Mealybug	Indoor air, Durian, Mealybug, Day 6	Indoor air, Durian, Mealybug, Day 6-7	Ripened	Indoor air, Durian, Mealybug, Ripened
Red	-31.2812	-86.0043	-77.7464	83.3458	36.65	53.55	GT01_20250421_085853	1.7452e+09	92	6	GT01	Indoor air, Durian, Mealybug	Indoor air, Durian, Mealybug, Day 6	Indoor air, Durian, Mealybug, Day 6-7	Ripened	Indoor air, Durian, Mealybug, Ripened
Red	-31.5048	-87.6683	-79.4376	82.925	36.65	53.62	GT01_20250421_085853	1.7452e+09	93	6	GT01	Indoor air, Durian, Mealybug	Indoor air, Durian, Mealybug, Day 6	Indoor air, Durian, Mealybug, Day 6-7	Ripened	Indoor air, Durian, Mealybug, Ripened
Red	-30.9635	-88.4327	-79.2374	85.9343	36.63	53.71	GT01_20250421_085853	1.7452e+09	94	6	GT01	Indoor air, Durian, Mealybug	Indoor air, Durian, Mealybug, Day 6	Indoor air, Durian, Mealybug, Day 6-7	Ripened	Indoor air, Durian, Mealybug, Ripened
Red	-32.0478	-92.7094	-83.5446	85.9032	36.65	53.79	GT01_20250421_085853	1.7452e+09	95	6	GT01	Indoor air, Durian, Mealybug	Indoor air, Durian, Mealybug, Day 6	Indoor air, Durian, Mealybug, Day 6-7	Ripened	Indoor air, Durian, Mealybug, Ripened
Red	-32.1125	-95.0877	-85.9812	87.2767	36.64	53.94	GT01_20250421_085853	1.7452e+09	96	6	GT01	Indoor air, Durian, Mealybug	Indoor air, Durian, Mealybug, Day 6	Indoor air, Durian, Mealybug, Day 6-7	Ripened	Indoor air, Durian, Mealybug, Ripened
Red	-31.0814	-96.7527	-87.693	90.8305	36.63	54.06	GT01_20250421_085853	1.7452e+09	97	6	GT01	Indoor air, Durian, Mealybug	Indoor air, Durian, Mealybug, Day 6	Indoor air, Durian, Mealybug, Day 6-7	Ripened	Indoor air, Durian, Mealybug, Ripened
Red	-29.297	-92.9546	-83.9311	93.6651	36.58	54.15	GT01_20250421_085853	1.7452e+09	98	6	GT01	Indoor air, Durian, Mealybug	Indoor air, Durian, Mealybug, Day 6	Indoor air, Durian, Mealybug, Day 6-7	Ripened	Indoor air, Durian, Mealybug, Ripened
Red	-28.1816	-90.3429	-81.3357	98.2501	36.55	54.19	GT01_20250421_085853	1.7452e+09	99	6	GT01	Indoor air, Durian, Mealybug	Indoor air, Durian, Mealybug, Day 6	Indoor air, Durian, Mealybug, Day 6-7	Ripened	Indoor air, Durian, Mealybug, Ripened
Red	-28.2774	-91.0561	-82.0604	98.0698	36.55	54.22	GT01_20250421_085853	1.7452e+09	100	6	GT01	Indoor air, Durian, Mealybug	Indoor air, Durian, Mealybug, Day 6	Indoor air, Durian, Mealybug, Day 6-7	Ripened	Indoor air, Durian, Mealybug, Ripened
Red	-27.455	-75.7007	-72.383	94.5086	36.45	53.47	GT01_20250422_082117	1.74528e+09	71	7	GT01	Indoor air, Durian, Mealybug	Indoor air, Durian, Mealybug, Day 7	Indoor air, Durian, Mealybug, Day 6-7	Ripened	Indoor air, Durian, Mealybug, Ripened
Red	-27.9236	-68.096	-64.6935	87.3813	36.43	53.25	GT01_20250422_082117	1.74528e+09	72	7	GT01	Indoor air, Durian, Mealybug	Indoor air, Durian, Mealybug, Day 7	Indoor air, Durian, Mealybug, Day 6-7	Ripened	Indoor air, Durian, Mealybug, Ripened
Red	-27.6476	-63.3929	-59.9367	82.7731	36.41	53.11	GT01_20250422_082117	1.74528e+09	73	7	GT01	Indoor air, Durian, Mealybug	Indoor air, Durian, Mealybug, Day 7	Indoor air, Durian, Mealybug, Day 6-7	Ripened	Indoor air, Durian, Mealybug, Ripened
Red	-28.6795	-63.6307	-61.1783	76.713	36.41	53.12	GT01_20250422_082117	1.74528e+09	74	7	GT01	Indoor air, Durian, Mealybug	Indoor air, Durian, Mealybug, Day 7	Indoor air, Durian, Mealybug, Day 6-7	Ripened	Indoor air, Durian, Mealybug, Ripened
Red	-29.3167	-65.5794	-62.1033	74.5234	36.43	53.06	GT01_20250422_082117	1.74528e+09	75	7	GT01	Indoor air, Durian, Mealybug	Indoor air, Durian, Mealybug, Day 7	Indoor air, Durian, Mealybug, Day 6-7	Ripened	Indoor air, Durian, Mealybug, Ripened
Red	-29.2652	-63.4431	-59.9911	74.9882	36.4	53.12	GT01_20250422_082117	1.74528e+09	76	7	GT01	Indoor air, Durian, Mealybug	Indoor air, Durian, Mealybug, Day 7	Indoor air, Durian, Mealybug, Day 6-7	Ripened	Indoor air, Durian, Mealybug, Ripened
Red	-29.1382	-64.3951	-61.9781	74.7223	36.39	53.21	GT01_20250422_082117	1.74528e+09	77	7	GT01	Indoor air, Durian, Mealybug	Indoor air, Durian, Mealybug, Day 7	Indoor air, Durian, Mealybug, Day 6-7	Ripened	Indoor air, Durian, Mealybug, Ripened
Red	-28.6608	-64.6349	-63.2611	75.6114	36.37	53.32	GT01_20250422_082117	1.74528e+09	78	7	GT01	Indoor air, Durian, Mealybug	Indoor air, Durian, Mealybug, Day 7	Indoor air, Durian, Mealybug, Day 6-7	Ripened	Indoor air, Durian, Mealybug, Ripened
Red	-29.6174	-67.9608	-66.602	76.8207	36.39	53.36	GT01_20250422_082117	1.74528e+09	79	7	GT01	Indoor air, Durian, Mealybug	Indoor air, Durian, Mealybug, Day 7	Indoor air, Durian, Mealybug, Day 6-7	Ripened	Indoor air, Durian, Mealybug, Ripened
Red	-28.8852	-69.2017	-66.9057	79.6843	36.36	53.52	GT01_20250422_082117	1.74528e+09	80	7	GT01	Indoor air, Durian, Mealybug	Indoor air, Durian, Mealybug, Day 7	Indoor air, Durian, Mealybug, Day 6-7	Ripened	Indoor air, Durian, Mealybug, Ripened
Red	-27.4078	-69.4415	-67.1886	81.5733	36.34	53.63	GT01_20250422_082117	1.74528e+09	81	7	GT01	Indoor air, Durian, Mealybug	Indoor air, Durian, Mealybug, Day 7	Indoor air, Durian, Mealybug, Day 6-7	Ripened	Indoor air, Durian, Mealybug, Ripened
Red	-28.4602	-73.4806	-71.2543	84.6023	36.36	53.7	GT01_20250422_082117	1.74528e+09	82	7	GT01	Indoor air, Durian, Mealybug	Indoor air, Durian, Mealybug, Day 7	Indoor air, Durian, Mealybug, Day 6-7	Ripened	Indoor air, Durian, Mealybug, Ripened
Red	-27.9828	-73.7204	-71.5373	85.4914	36.34	53.81	GT01_20250422_082117	1.74528e+09	83	7	GT01	Indoor air, Durian, Mealybug	Indoor air, Durian, Mealybug, Day 7	Indoor air, Durian, Mealybug, Day 6-7	Ripened	Indoor air, Durian, Mealybug, Ripened
Red	-28.3022	-77.0976	-73.9532	88.8903	36.34	53.91	GT01_20250422_082117	1.74528e+09	84	7	GT01	Indoor air, Durian, Mealybug	Indoor air, Durian, Mealybug, Day 7	Indoor air, Durian, Mealybug, Day 6-7	Ripened	Indoor air, Durian, Mealybug, Ripened
Red	-27.2826	-75.199	-72.0825	91.2949	36.31	53.98	GT01_20250422_082117	1.74528e+09	85	7	GT01	Indoor air, Durian, Mealybug	Indoor air, Durian, Mealybug, Day 7	Indoor air, Durian, Mealybug, Day 6-7	Ripened	Indoor air, Durian, Mealybug, Ripened
Red	-27.1868	-74.4859	-72.3578	91.4752	36.31	53.95	GT01_20250422_082117	1.74528e+09	86	7	GT01	Indoor air, Durian, Mealybug	Indoor air, Durian, Mealybug, Day 7	Indoor air, Durian, Mealybug, Day 6-7	Ripened	Indoor air, Durian, Mealybug, Ripened
Red	-26.6438	-70.4447	-68.2507	92.4971	36.31	53.78	GT01_20250422_082117	1.74528e+09	87	7	GT01	Indoor air, Durian, Mealybug	Indoor air, Durian, Mealybug, Day 7	Indoor air, Durian, Mealybug, Day 6-7	Ripened	Indoor air, Durian, Mealybug, Ripened
Red	-26.5586	-65.2652	-62.9901	89.0345	36.3	53.57	GT01_20250422_082117	1.74528e+09	88	7	GT01	Indoor air, Durian, Mealybug	Indoor air, Durian, Mealybug, Day 7	Indoor air, Durian, Mealybug, Day 6-7	Ripened	Indoor air, Durian, Mealybug, Ripened
Red	-26.1238	-61.2764	-57.9788	82.2206	36.27	53.51	GT01_20250422_082117	1.74528e+09	89	7	GT01	Indoor air, Durian, Mealybug	Indoor air, Durian, Mealybug, Day 7	Indoor air, Durian, Mealybug, Day 6-7	Ripened	Indoor air, Durian, Mealybug, Ripened
Red	-26.9641	-60.0878	-56.7708	78.5211	36.27	53.46	GT01_20250422_082117	1.74528e+09	90	7	GT01	Indoor air, Durian, Mealybug	Indoor air, Durian, Mealybug, Day 7	Indoor air, Durian, Mealybug, Day 6-7	Ripened	Indoor air, Durian, Mealybug, Ripened
Red	-28.1238	-61.2764	-58.9788	77.2206	36.27	53.51	GT01_20250422_082117	1.74528e+09	91	7	GT01	Indoor air, Durian, Mealybug	Indoor air, Durian, Mealybug, Day 7	Indoor air, Durian, Mealybug, Day 6-7	Ripened	Indoor air, Durian, Mealybug, Ripened
Red	-28.4432	-64.6535	-61.3947	76.6195	36.27	53.61	GT01_20250422_082117	1.74528e+09	92	7	GT01	Indoor air, Durian, Mealybug	Indoor air, Durian, Mealybug, Day 7	Indoor air, Durian, Mealybug, Day 6-7	Ripened	Indoor air, Durian, Mealybug, Ripened
Red	-28.3482	-65.8432	-62.6233	76.2935	36.26	53.71	GT01_20250422_082117	1.74528e+09	93	7	GT01	Indoor air, Durian, Mealybug	Indoor air, Durian, Mealybug, Day 7	Indoor air, Durian, Mealybug, Day 6-7	Ripened	Indoor air, Durian, Mealybug, Ripened
Red	-27.9347	-67.5584	-64.3895	78.0624	36.24	53.84	GT01_20250422_082117	1.74528e+09	94	7	GT01	Indoor air, Durian, Mealybug	Indoor air, Durian, Mealybug, Day 7	Indoor air, Durian, Mealybug, Day 6-7	Ripened	Indoor air, Durian, Mealybug, Ripened
Red	-27.7758	-68.2726	-65.135	81.8566	36.23	53.92	GT01_20250422_082117	1.74528e+09	95	7	GT01	Indoor air, Durian, Mealybug	Indoor air, Durian, Mealybug, Day 7	Indoor air, Durian, Mealybug, Day 6-7	Ripened	Indoor air, Durian, Mealybug, Ripened
Red	-25.7882	-66.6118	-63.5059	85.2011	36.2	54	GT01_20250422_082117	1.74528e+09	96	7	GT01	Indoor air, Durian, Mealybug	Indoor air, Durian, Mealybug, Day 7	Indoor air, Durian, Mealybug, Day 6-7	Ripened	Indoor air, Durian, Mealybug, Ripened
Red	-26.8086	-70.4131	-68.33	85.2902	36.22	54.06	GT01_20250422_082117	1.74528e+09	97	7	GT01	Indoor air, Durian, Mealybug	Indoor air, Durian, Mealybug, Day 7	Indoor air, Durian, Mealybug, Day 6-7	Ripened	Indoor air, Durian, Mealybug, Ripened
Red	-26.0757	-68.7512	-66.6802	87.6601	36.2	54.09	GT01_20250422_082117	1.74528e+09	98	7	GT01	Indoor air, Durian, Mealybug	Indoor air, Durian, Mealybug, Day 7	Indoor air, Durian, Mealybug, Day 6-7	Ripened	Indoor air, Durian, Mealybug, Ripened
Red	-26.5867	-73.5547	-70.5457	87.6984	36.2	54.25	GT01_20250422_082117	1.74528e+09	99	7	GT01	Indoor air, Durian, Mealybug	Indoor air, Durian, Mealybug, Day 7	Indoor air, Durian, Mealybug, Day 6-7	Ripened	Indoor air, Durian, Mealybug, Ripened
Red	-25.7268	-72.8447	-69.883	92.8025	36.17	54.37	GT01_20250422_082117	1.74528e+09	100	7	GT01	Indoor air, Durian, Mealybug	Indoor air, Durian, Mealybug, Day 7	Indoor air, Durian, Mealybug, Day 6-7	Ripened	Indoor air, Durian, Mealybug, Ripened
Red	-9.95889	-65.9448	-60.7488	137.296	36.3	53.59	GT01_20250423_093035	1.74538e+09	71	8	GT01	Indoor air, Durian, Mealybug	Indoor air, Durian, Mealybug, Day 8	Indoor air, Durian, Mealybug, Day 8-9	After ripened	Indoor air, Durian, Mealybug, After ripened
Red	-10.415	-60.0009	-55.6883	127.824	36.31	53.29	GT01_20250423_093035	1.74538e+09	72	8	GT01	Indoor air, Durian, Mealybug	Indoor air, Durian, Mealybug, Day 8	Indoor air, Durian, Mealybug, Day 8-9	After ripened	Indoor air, Durian, Mealybug, After ripened
Red	-12.1702	-53.6328	-48.2197	114.662	36.3	53.03	GT01_20250423_093035	1.74538e+09	73	8	GT01	Indoor air, Durian, Mealybug	Indoor air, Durian, Mealybug, Day 8	Indoor air, Durian, Mealybug, Day 8-9	After ripened	Indoor air, Durian, Mealybug, After ripened
Red	-14.8188	-52.0179	-46.5622	105.323	36.3	52.92	GT01_20250423_093035	1.74538e+09	74	8	GT01	Indoor air, Durian, Mealybug	Indoor air, Durian, Mealybug, Day 8	Indoor air, Durian, Mealybug, Day 8-9	After ripened	Indoor air, Durian, Mealybug, After ripened
Red	-14.5322	-51.7813	-47.3413	105.358	36.29	52.96	GT01_20250423_093035	1.74538e+09	75	8	GT01	Indoor air, Durian, Mealybug	Indoor air, Durian, Mealybug, Day 8	Indoor air, Durian, Mealybug, Day 8-9	After ripened	Indoor air, Durian, Mealybug, After ripened
Red	-15.266	-55.3459	-50.9445	104.482	36.3	53.06	GT01_20250423_093035	1.74538e+09	76	8	GT01	Indoor air, Durian, Mealybug	Indoor air, Durian, Mealybug, Day 8	Indoor air, Durian, Mealybug, Day 8-9	After ripened	Indoor air, Durian, Mealybug, After ripened
Red	-14.0237	-54.6862	-50.3361	107.801	36.26	53.19	GT01_20250423_093035	1.74538e+09	77	8	GT01	Indoor air, Durian, Mealybug	Indoor air, Durian, Mealybug, Day 8	Indoor air, Durian, Mealybug, Day 8-9	After ripened	Indoor air, Durian, Mealybug, After ripened
Red	-14.407	-57.5388	-53.2352	108.08	36.26	53.31	GT01_20250423_093035	1.74538e+09	78	8	GT01	Indoor air, Durian, Mealybug	Indoor air, Durian, Mealybug, Day 8	Indoor air, Durian, Mealybug, Day 8-9	After ripened	Indoor air, Durian, Mealybug, After ripened
Red	-14.1531	-59.4426	-55.2093	109.548	36.24	53.49	GT01_20250423_093035	1.74538e+09	79	8	GT01	Indoor air, Durian, Mealybug	Indoor air, Durian, Mealybug, Day 8	Indoor air, Durian, Mealybug, Day 8-9	After ripened	Indoor air, Durian, Mealybug, After ripened
Red	-13.9951	-62.0596	-57.9082	114.836	36.22	53.7	GT01_20250423_093035	1.74538e+09	80	8	GT01	Indoor air, Durian, Mealybug	Indoor air, Durian, Mealybug, Day 8	Indoor air, Durian, Mealybug, Day 8-9	After ripened	Indoor air, Durian, Mealybug, After ripened
Red	-14.9525	-67.2883	-63.2025	118.539	36.23	53.87	GT01_20250423_093035	1.74538e+09	81	8	GT01	Indoor air, Durian, Mealybug	Indoor air, Durian, Mealybug, Day 8	Indoor air, Durian, Mealybug, Day 8-9	After ripened	Indoor air, Durian, Mealybug, After ripened
Red	-14.0492	-69.9042	-65.8807	125.852	36.22	54.03	GT01_20250423_093035	1.74538e+09	82	8	GT01	Indoor air, Durian, Mealybug	Indoor air, Durian, Mealybug, Day 8	Indoor air, Durian, Mealybug, Day 8-9	After ripened	Indoor air, Durian, Mealybug, After ripened
Red	-13.6356	-70.6195	-66.6469	132.621	36.2	54.16	GT01_20250423_093035	1.74538e+09	83	8	GT01	Indoor air, Durian, Mealybug	Indoor air, Durian, Mealybug, Day 8	Indoor air, Durian, Mealybug, Day 8-9	After ripened	Indoor air, Durian, Mealybug, After ripened
Red	-12.8592	-72.2835	-68.338	134.2	36.2	54.23	GT01_20250423_093035	1.74538e+09	84	8	GT01	Indoor air, Durian, Mealybug	Indoor air, Durian, Mealybug, Day 8	Indoor air, Durian, Mealybug, Day 8-9	After ripened	Indoor air, Durian, Mealybug, After ripened
Red	-11.7758	-69.9095	-65.9842	135.725	36.17	54.28	GT01_20250423_093035	1.74538e+09	85	8	GT01	Indoor air, Durian, Mealybug	Indoor air, Durian, Mealybug, Day 8	Indoor air, Durian, Mealybug, Day 8-9	After ripened	Indoor air, Durian, Mealybug, After ripened
Red	-11.8716	-71.6226	-66.709	135.545	36.17	54.31	GT01_20250423_093035	1.74538e+09	86	8	GT01	Indoor air, Durian, Mealybug	Indoor air, Durian, Mealybug, Day 8	Indoor air, Durian, Mealybug, Day 8-9	After ripened	Indoor air, Durian, Mealybug, After ripened
Red	-10.8823	-66.1563	-61.1731	136.902	36.16	54.13	GT01_20250423_093035	1.74538e+09	87	8	GT01	Indoor air, Durian, Mealybug	Indoor air, Durian, Mealybug, Day 8	Indoor air, Durian, Mealybug, Day 8-9	After ripened	Indoor air, Durian, Mealybug, After ripened
Red	-10.4457	-57.3619	-53.2549	132.101	36.15	53.81	GT01_20250423_093035	1.74538e+09	88	8	GT01	Indoor air, Durian, Mealybug	Indoor air, Durian, Mealybug, Day 8	Indoor air, Durian, Mealybug, Day 8-9	After ripened	Indoor air, Durian, Mealybug, After ripened
Red	-11.775	-52.3698	-48.1816	119.363	36.15	53.6	GT01_20250423_093035	1.74538e+09	89	8	GT01	Indoor air, Durian, Mealybug	Indoor air, Durian, Mealybug, Day 8	Indoor air, Durian, Mealybug, Day 8-9	After ripened	Indoor air, Durian, Mealybug, After ripened
Red	-12.6268	-49.6177	-43.3911	109.514	36.13	53.5	GT01_20250423_093035	1.74538e+09	90	8	GT01	Indoor air, Durian, Mealybug	Indoor air, Durian, Mealybug, Day 8	Indoor air, Durian, Mealybug, Day 8-9	After ripened	Indoor air, Durian, Mealybug, After ripened
Red	-12.8823	-51.5194	-46.3239	109.033	36.13	53.58	GT01_20250423_093035	1.74538e+09	91	8	GT01	Indoor air, Durian, Mealybug	Indoor air, Durian, Mealybug, Day 8	Indoor air, Durian, Mealybug, Day 8-9	After ripened	Indoor air, Durian, Mealybug, After ripened
Red	-12.7554	-52.4713	-48.3109	108.768	36.12	53.67	GT01_20250423_093035	1.74538e+09	92	8	GT01	Indoor air, Durian, Mealybug	Indoor air, Durian, Mealybug, Day 8	Indoor air, Durian, Mealybug, Day 8-9	After ripened	Indoor air, Durian, Mealybug, After ripened
Red	-12.246	-52.4734	-48.3523	112.717	36.1	53.77	GT01_20250423_093035	1.74538e+09	93	8	GT01	Indoor air, Durian, Mealybug	Indoor air, Durian, Mealybug, Day 8	Indoor air, Durian, Mealybug, Day 8-9	After ripened	Indoor air, Durian, Mealybug, After ripened
Red	-11.0987	-49.624	-45.5153	115.362	36.07	53.8	GT01_20250423_093035	1.74538e+09	94	8	GT01	Indoor air, Durian, Mealybug	Indoor air, Durian, Mealybug, Day 8	Indoor air, Durian, Mealybug, Day 8-9	After ripened	Indoor air, Durian, Mealybug, After ripened
Red	-11.4181	-52.0012	-47.9312	116.761	36.07	53.9	GT01_20250423_093035	1.74538e+09	95	8	GT01	Indoor air, Durian, Mealybug	Indoor air, Durian, Mealybug, Day 8	Indoor air, Durian, Mealybug, Day 8-9	After ripened	Indoor air, Durian, Mealybug, After ripened
Red	-11.6736	-54.9029	-49.864	116.28	36.07	53.98	GT01_20250423_093035	1.74538e+09	96	8	GT01	Indoor air, Durian, Mealybug	Indoor air, Durian, Mealybug, Day 8	Indoor air, Durian, Mealybug, Day 8-9	After ripened	Indoor air, Durian, Mealybug, After ripened
Red	-11.5787	-56.0925	-51.0926	117.954	36.06	54.08	GT01_20250423_093035	1.74538e+09	97	8	GT01	Indoor air, Durian, Mealybug	Indoor air, Durian, Mealybug, Day 8	Indoor air, Durian, Mealybug, Day 8-9	After ripened	Indoor air, Durian, Mealybug, After ripened
Red	-11.5795	-57.9953	-53.046	120.448	36.05	54.21	GT01_20250423_093035	1.74538e+09	98	8	GT01	Indoor air, Durian, Mealybug	Indoor air, Durian, Mealybug, Day 8	Indoor air, Durian, Mealybug, Day 8-9	After ripened	Indoor air, Durian, Mealybug, After ripened
Red	-11.1225	-63.0365	-57.1531	124.426	36.05	54.38	GT01_20250423_093035	1.74538e+09	99	8	GT01	Indoor air, Durian, Mealybug	Indoor air, Durian, Mealybug, Day 8	Indoor air, Durian, Mealybug, Day 8-9	After ripened	Indoor air, Durian, Mealybug, After ripened
Red	-9.60162	-66.6022	-60.7769	131.524	36.05	54.53	GT01_20250423_093035	1.74538e+09	100	8	GT01	Indoor air, Durian, Mealybug	Indoor air, Durian, Mealybug, Day 8	Indoor air, Durian, Mealybug, Day 8-9	After ripened	Indoor air, Durian, Mealybug, After ripened
Red	14.5568	-34.0618	-33.0351	148.597	38.27	47.14	GT01_20250424_133755	1.74548e+09	71	9	GT01	Indoor air, Durian, Mealybug	Indoor air, Durian, Mealybug, Day 9	Indoor air, Durian, Mealybug, Day 8-9	After ripened	Indoor air, Durian, Mealybug, After ripened
Red	16.9065	-35.2525	-33.2845	151.245	38.25	47.29	GT01_20250424_133755	1.74548e+09	72	9	GT01	Indoor air, Durian, Mealybug	Indoor air, Durian, Mealybug, Day 9	Indoor air, Durian, Mealybug, Day 8-9	After ripened	Indoor air, Durian, Mealybug, After ripened
Red	17.7361	-30.9747	-28.9565	152.302	38.24	47.16	GT01_20250424_133755	1.74548e+09	73	9	GT01	Indoor air, Durian, Mealybug	Indoor air, Durian, Mealybug, Day 9	Indoor air, Durian, Mealybug, Day 8-9	After ripened	Indoor air, Durian, Mealybug, After ripened
Red	18.886	-23.4169	-20.2593	154.466	38.24	46.8	GT01_20250424_133755	1.74548e+09	74	9	GT01	Indoor air, Durian, Mealybug	Indoor air, Durian, Mealybug, Day 9	Indoor air, Durian, Mealybug, Day 8-9	After ripened	Indoor air, Durian, Mealybug, After ripened
Red	18.1956	-13.6706	-11.3541	147.93	38.24	46.39	GT01_20250424_133755	1.74548e+09	75	9	GT01	Indoor air, Durian, Mealybug	Indoor air, Durian, Mealybug, Day 9	Indoor air, Durian, Mealybug, Day 8-9	After ripened	Indoor air, Durian, Mealybug, After ripened
Red	15.4289	-3.73892	-1.30306	132.619	38.21	46.08	GT01_20250424_133755	1.74548e+09	76	9	GT01	Indoor air, Durian, Mealybug	Indoor air, Durian, Mealybug, Day 9	Indoor air, Durian, Mealybug, Day 8-9	After ripened	Indoor air, Durian, Mealybug, After ripened
Red	10.908	-1.17319	0.320793	120.521	38.21	45.93	GT01_20250424_133755	1.74548e+09	77	9	GT01	Indoor air, Durian, Mealybug	Indoor air, Durian, Mealybug, Day 9	Indoor air, Durian, Mealybug, Day 8-9	After ripened	Indoor air, Durian, Mealybug, After ripened
Red	9.22659	-0.698826	0.783276	119.616	38.2	45.96	GT01_20250424_133755	1.74548e+09	78	9	GT01	Indoor air, Durian, Mealybug	Indoor air, Durian, Mealybug, Day 9	Indoor air, Durian, Mealybug, Day 8-9	After ripened	Indoor air, Durian, Mealybug, After ripened
Red	8.03494	-2.12512	-1.66626	119.255	38.2	46.02	GT01_20250424_133755	1.74548e+09	79	9	GT01	Indoor air, Durian, Mealybug	Indoor air, Durian, Mealybug, Day 9	Indoor air, Durian, Mealybug, Day 8-9	After ripened	Indoor air, Durian, Mealybug, After ripened
Red	7.65165	-5.9777	-5.56535	118.534	38.2	46.14	GT01_20250424_133755	1.74548e+09	80	9	GT01	Indoor air, Durian, Mealybug	Indoor air, Durian, Mealybug, Day 9	Indoor air, Durian, Mealybug, Day 8-9	After ripened	Indoor air, Durian, Mealybug, After ripened
Red	8.22405	-7.40717	-7.07698	123.097	38.17	46.35	GT01_20250424_133755	1.74548e+09	81	9	GT01	Indoor air, Durian, Mealybug	Indoor air, Durian, Mealybug, Day 9	Indoor air, Durian, Mealybug, Day 8-9	After ripened	Indoor air, Durian, Mealybug, After ripened
Red	9.0635	-10.4985	-10.2383	126.29	38.16	46.53	GT01_20250424_133755	1.74548e+09	82	9	GT01	Indoor air, Durian, Mealybug	Indoor air, Durian, Mealybug, Day 9	Indoor air, Durian, Mealybug, Day 8-9	After ripened	Indoor air, Durian, Mealybug, After ripened
Red	10.6163	-13.8265	-13.6206	131.448	38.16	46.67	GT01_20250424_133755	1.74548e+09	83	9	GT01	Indoor air, Durian, Mealybug	Indoor air, Durian, Mealybug, Day 9	Indoor air, Durian, Mealybug, Day 8-9	After ripened	Indoor air, Durian, Mealybug, After ripened
Red	11.1372	-17.3923	-16.2445	136.547	38.16	46.82	GT01_20250424_133755	1.74548e+09	84	9	GT01	Indoor air, Durian, Mealybug	Indoor air, Durian, Mealybug, Day 9	Indoor air, Durian, Mealybug, Day 8-9	After ripened	Indoor air, Durian, Mealybug, After ripened
Red	15.5073	-14.7816	-13.6698	142.106	38.12	46.91	GT01_20250424_133755	1.74548e+09	85	9	GT01	Indoor air, Durian, Mealybug	Indoor air, Durian, Mealybug, Day 9	Indoor air, Durian, Mealybug, Day 8-9	After ripened	Indoor air, Durian, Mealybug, After ripened
Red	14.6457	-19.2972	-18.2393	142.99	38.13	47.05	GT01_20250424_133755	1.74548e+09	86	9	GT01	Indoor air, Durian, Mealybug	Indoor air, Durian, Mealybug, Day 9	Indoor air, Durian, Mealybug, Day 8-9	After ripened	Indoor air, Durian, Mealybug, After ripened
Red	15.3263	-21.6743	-20.6552	144.389	38.13	47.15	GT01_20250424_133755	1.74548e+09	87	9	GT01	Indoor air, Durian, Mealybug	Indoor air, Durian, Mealybug, Day 9	Indoor air, Durian, Mealybug, Day 8-9	After ripened	Indoor air, Durian, Mealybug, After ripened
Red	17.1347	-23.1006	-22.1047	148.028	38.13	47.21	GT01_20250424_133755	1.74548e+09	88	9	GT01	Indoor air, Durian, Mealybug	Indoor air, Durian, Mealybug, Day 9	Indoor air, Durian, Mealybug, Day 8-9	After ripened	Indoor air, Durian, Mealybug, After ripened
Red	17.3574	-23.3394	-22.367	147.942	38.12	47.27	GT01_20250424_133755	1.74548e+09	89	9	GT01	Indoor air, Durian, Mealybug	Indoor air, Durian, Mealybug, Day 9	Indoor air, Durian, Mealybug, Day 8-9	After ripened	Indoor air, Durian, Mealybug, After ripened
Red	18.9528	-15.2592	-15.1943	149.935	38.1	47.03	GT01_20250424_133755	1.74548e+09	90	9	GT01	Indoor air, Durian, Mealybug	Indoor air, Durian, Mealybug, Day 9	Indoor air, Durian, Mealybug, Day 8-9	After ripened	Indoor air, Durian, Mealybug, After ripened
Red	19.9749	-8.65232	-7.46345	151.859	38.1	46.71	GT01_20250424_133755	1.74548e+09	91	9	GT01	Indoor air, Durian, Mealybug	Indoor air, Durian, Mealybug, Day 9	Indoor air, Durian, Mealybug, Day 8-9	After ripened	Indoor air, Durian, Mealybug, After ripened
Red	17.3156	-1.57107	-0.27009	136.877	38.09	46.42	GT01_20250424_133755	1.74548e+09	92	9	GT01	Indoor air, Durian, Mealybug	Indoor air, Durian, Mealybug, Day 9	Indoor air, Durian, Mealybug, Day 8-9	After ripened	Indoor air, Durian, Mealybug, After ripened
Red	15.1017	6.03262	7.3987	124.724	38.06	46.25	GT01_20250424_133755	1.74548e+09	93	9	GT01	Indoor air, Durian, Mealybug	Indoor air, Durian, Mealybug, Day 9	Indoor air, Durian, Mealybug, Day 8-9	After ripened	Indoor air, Durian, Mealybug, After ripened
Red	11.7832	4.55825	4.93622	121.63	38.07	46.22	GT01_20250424_133755	1.74548e+09	94	9	GT01	Indoor air, Durian, Mealybug	Indoor air, Durian, Mealybug, Day 9	Indoor air, Durian, Mealybug, Day 8-9	After ripened	Indoor air, Durian, Mealybug, After ripened
Red	10.4753	-1.3825	-1.06214	120.178	38.09	46.37	GT01_20250424_133755	1.74548e+09	95	9	GT01	Indoor air, Durian, Mealybug	Indoor air, Durian, Mealybug, Day 9	Indoor air, Durian, Mealybug, Day 8-9	After ripened	Indoor air, Durian, Mealybug, After ripened
Red	11.6218	-0.435887	-1.17857	120.316	38.05	46.53	GT01_20250424_133755	1.74548e+09	96	9	GT01	Indoor air, Durian, Mealybug	Indoor air, Durian, Mealybug, Day 9	Indoor air, Durian, Mealybug, Day 8-9	After ripened	Indoor air, Durian, Mealybug, After ripened
Red	12.1631	-0.200296	-0.978377	126.326	38.03	46.62	GT01_20250424_133755	1.74548e+09	97	9	GT01	Indoor air, Durian, Mealybug	Indoor air, Durian, Mealybug, Day 9	Indoor air, Durian, Mealybug, Day 8-9	After ripened	Indoor air, Durian, Mealybug, After ripened
Red	12.7594	-7.85419	-7.7015	128.693	38.05	46.8	GT01_20250424_133755	1.74548e+09	98	9	GT01	Indoor air, Durian, Mealybug	Indoor air, Durian, Mealybug, Day 9	Indoor air, Durian, Mealybug, Day 8-9	After ripened	Indoor air, Durian, Mealybug, After ripened
Red	14.6512	-6.90652	-6.79724	131.858	38.02	46.91	GT01_20250424_133755	1.74548e+09	99	9	GT01	Indoor air, Durian, Mealybug	Indoor air, Durian, Mealybug, Day 9	Indoor air, Durian, Mealybug, Day 8-9	After ripened	Indoor air, Durian, Mealybug, After ripened
Red	15.0008	-8.09722	-8.04658	136.506	38	47.06	GT01_20250424_133755	1.74548e+09	100	9	GT01	Indoor air, Durian, Mealybug	Indoor air, Durian, Mealybug, Day 9	Indoor air, Durian, Mealybug, Day 8-9	After ripened	Indoor air, Durian, Mealybug, After ripened
Blue	-18.997	-46.1831	-46.4762	-29.8911	37.45	47.94	GT02_20250418_150126	1744963287	71	3	GT02	Indoor air, Durian	Indoor air, Durian, Day 3	Indoor air, Durian, Day 3	Before ripened	Indoor air, Durian, Before ripened
Blue	-18.0413	-45.76	-46.0888	-29.6067	37.42	48.03	GT02_20250418_150126	1744963287	72	3	GT02	Indoor air, Durian	Indoor air, Durian, Day 3	Indoor air, Durian, Day 3	Before ripened	Indoor air, Durian, Before ripened
Blue	-17.4361	-45.049	-45.4054	-29.4772	37.4	48.1	GT02_20250418_150126	1744963287	73	3	GT02	Indoor air, Durian	Indoor air, Durian, Day 3	Indoor air, Durian, Day 3	Before ripened	Indoor air, Durian, Before ripened
Blue	-18.043	-49.5656	-49.9956	-30.6193	37.4	48.29	GT02_20250418_150126	1744963287	74	3	GT02	Indoor air, Durian	Indoor air, Durian, Day 3	Indoor air, Durian, Day 3	Before ripened	Indoor air, Durian, Before ripened
Blue	-18.5975	-50.0432	-50.5202	-30.7904	37.38	48.41	GT02_20250418_150126	1744963287	75	3	GT02	Indoor air, Durian	Indoor air, Durian, Day 3	Indoor air, Durian, Day 3	Before ripened	Indoor air, Durian, Before ripened
Blue	-18.79	-53.3722	-53.9231	-30.6573	37.37	48.6	GT02_20250418_150126	1744963287	76	3	GT02	Indoor air, Durian	Indoor air, Durian, Day 3	Indoor air, Durian, Day 3	Before ripened	Indoor air, Durian, Before ripened
Blue	-19.1413	-55.9871	-56.5806	-31.3186	37.37	48.71	GT02_20250418_150126	1744963287	77	3	GT02	Indoor air, Durian	Indoor air, Durian, Day 3	Indoor air, Durian, Day 3	Before ripened	Indoor air, Durian, Before ripened
Blue	-17.9629	-54.8028	-56.4555	-31.1197	37.33	48.86	GT02_20250418_150126	1744963287	78	3	GT02	Indoor air, Durian	Indoor air, Durian, Day 3	Indoor air, Durian, Day 3	Before ripened	Indoor air, Durian, Before ripened
Blue	-18.442	-59.3685	-60.0793	-32.0213	37.33	49.01	GT02_20250418_150126	1744963287	79	3	GT02	Indoor air, Durian	Indoor air, Durian, Day 3	Indoor air, Durian, Day 3	Before ripened	Indoor air, Durian, Before ripened
Blue	-18.1882	-61.2723	-62.0534	-31.553	37.31	49.19	GT02_20250418_150126	1744963287	80	3	GT02	Indoor air, Durian	Indoor air, Durian, Day 3	Indoor air, Durian, Day 3	Before ripened	Indoor air, Durian, Before ripened
Blue	-16.6903	-57.7109	-58.5124	-30.7531	37.27	49.24	GT02_20250418_150126	1744963287	81	3	GT02	Indoor air, Durian	Indoor air, Durian, Day 3	Indoor air, Durian, Day 3	Before ripened	Indoor air, Durian, Before ripened
Blue	-17.1358	-57.2333	-57.9878	-30.582	37.29	49.12	GT02_20250418_150126	1744963287	82	3	GT02	Indoor air, Durian	Indoor air, Durian, Day 3	Indoor air, Durian, Day 3	Before ripened	Indoor air, Durian, Before ripened
Blue	-15.3496	-50.6296	-51.319	-28.7347	37.26	48.95	GT02_20250418_150126	1744963287	83	3	GT02	Indoor air, Durian	Indoor air, Durian, Day 3	Indoor air, Durian, Day 3	Before ripened	Indoor air, Durian, Before ripened
Blue	-13.8181	-43.0249	-44.6295	-26.862	37.24	48.73	GT02_20250418_150126	1744963287	84	3	GT02	Indoor air, Durian	Indoor air, Durian, Day 3	Indoor air, Durian, Day 3	Before ripened	Indoor air, Durian, Before ripened
Blue	-12.5422	-37.3218	-38.8728	-26.4702	37.22	48.59	GT02_20250418_150126	1744963287	85	3	GT02	Indoor air, Durian	Indoor air, Durian, Day 3	Indoor air, Durian, Day 3	Before ripened	Indoor air, Durian, Before ripened
Blue	-12.4783	-37.8464	-38.3896	-26.35	37.22	48.57	GT02_20250418_150126	1744963287	86	3	GT02	Indoor air, Durian	Indoor air, Durian, Day 3	Indoor air, Durian, Day 3	Before ripened	Indoor air, Durian, Before ripened
Blue	-11.7577	-34.5237	-35.1108	-25.6356	37.17	48.68	GT02_20250418_150126	1744963287	87	3	GT02	Indoor air, Durian	Indoor air, Durian, Day 3	Indoor air, Durian, Day 3	Before ripened	Indoor air, Durian, Before ripened
Blue	-12.0452	-37.6631	-38.2851	-26.1765	37.17	48.77	GT02_20250418_150126	1744963287	88	3	GT02	Indoor air, Durian	Indoor air, Durian, Day 3	Indoor air, Durian, Day 3	Before ripened	Indoor air, Durian, Before ripened
Blue	-13.2253	-42.653	-43.3171	-27.388	37.19	48.88	GT02_20250418_150126	1744963287	89	3	GT02	Indoor air, Durian	Indoor air, Durian, Day 3	Indoor air, Durian, Day 3	Before ripened	Indoor air, Durian, Before ripened
Blue	-12.3974	-42.1808	-42.896	-27.3441	37.16	49.01	GT02_20250418_150126	1744963287	90	3	GT02	Indoor air, Durian	Indoor air, Durian, Day 3	Indoor air, Durian, Day 3	Before ripened	Indoor air, Durian, Before ripened
Blue	-10.4221	-38.8591	-39.638	-26.655	37.1	49.17	GT02_20250418_150126	1744963287	91	3	GT02	Indoor air, Durian	Indoor air, Durian, Day 3	Indoor air, Durian, Day 3	Before ripened	Indoor air, Durian, Before ripened
Blue	-11.8578	-45.7508	-46.6027	-28.3474	37.12	49.36	GT02_20250418_150126	1744963287	92	3	GT02	Indoor air, Durian	Indoor air, Durian, Day 3	Indoor air, Durian, Day 3	Before ripened	Indoor air, Durian, Before ripened
Blue	-11.5081	-46.9415	-48.852	-27.6988	37.1	49.51	GT02_20250418_150126	1744963287	93	3	GT02	Indoor air, Durian	Indoor air, Durian, Day 3	Indoor air, Durian, Day 3	Before ripened	Indoor air, Durian, Before ripened
Blue	-10.6802	-47.4692	-48.4309	-27.6548	37.07	49.64	GT02_20250418_150126	1744963287	94	3	GT02	Indoor air, Durian	Indoor air, Durian, Day 3	Indoor air, Durian, Day 3	Before ripened	Indoor air, Durian, Before ripened
Blue	-11.4148	-52.9367	-53.9875	-29.0373	37.07	49.87	GT02_20250418_150126	1744963287	95	3	GT02	Indoor air, Durian	Indoor air, Durian, Day 3	Indoor air, Durian, Day 3	Before ripened	Indoor air, Durian, Before ripened
Blue	-10.5549	-52.2267	-53.3248	-27.9333	37.04	49.99	GT02_20250418_150126	1744963287	96	3	GT02	Indoor air, Durian	Indoor air, Durian, Day 3	Indoor air, Durian, Day 3	Before ripened	Indoor air, Durian, Before ripened
Blue	-10.46	-53.4163	-54.5535	-27.2592	37.03	50.09	GT02_20250418_150126	1744963287	97	3	GT02	Indoor air, Durian	Indoor air, Durian, Day 3	Indoor air, Durian, Day 3	Before ripened	Indoor air, Durian, Before ripened
Blue	-9.72615	-49.8517	-50.9503	-26.383	37.02	49.99	GT02_20250418_150126	1744963287	98	3	GT02	Indoor air, Durian	Indoor air, Durian, Day 3	Indoor air, Durian, Day 3	Before ripened	Indoor air, Durian, Before ripened
Blue	-8.25855	-43.7223	-44.744	-24.6305	37	49.79	GT02_20250418_150126	1744963287	99	3	GT02	Indoor air, Durian	Indoor air, Durian, Day 3	Indoor air, Durian, Day 3	Before ripened	Indoor air, Durian, Before ripened
Blue	-7.04563	-36.592	-37.517	-24.8526	36.99	49.54	GT02_20250418_150126	1744963287	100	3	GT02	Indoor air, Durian	Indoor air, Durian, Day 3	Indoor air, Durian, Day 3	Before ripened	Indoor air, Durian, Before ripened
Red	-16.8567	-74.1668	-75.8373	8.74187	36.92	52.32	GT02_20250419_101409	1745032450	71	4	GT02	Indoor air, Durian, Mealybug	Indoor air, Durian, Mealybug, Day 4	Indoor air, Durian, Mealybug, Day 4-5	Before ripened	Indoor air, Durian, Mealybug, Before ripened
Red	-16.7085	-70.4147	-72.0469	8.89324	36.9	52.22	GT02_20250419_101409	1745032450	72	4	GT02	Indoor air, Durian, Mealybug	Indoor air, Durian, Mealybug, Day 4	Indoor air, Durian, Mealybug, Day 4-5	Before ripened	Indoor air, Durian, Mealybug, Before ripened
Red	-17.7289	-74.216	-75.8709	6.98231	36.92	52.28	GT02_20250419_101409	1745032450	73	4	GT02	Indoor air, Durian, Mealybug	Indoor air, Durian, Mealybug, Day 4	Indoor air, Durian, Mealybug, Day 4-5	Before ripened	Indoor air, Durian, Mealybug, Before ripened
Red	-16.7094	-73.3174	-74.0003	7.38694	36.89	52.35	GT02_20250419_101409	1745032450	74	4	GT02	Indoor air, Durian, Mealybug	Indoor air, Durian, Mealybug, Day 4	Indoor air, Durian, Mealybug, Day 4-5	Before ripened	Indoor air, Durian, Mealybug, Before ripened
Red	-17.4112	-76.6444	-77.3619	6.57082	36.9	52.44	GT02_20250419_101409	1745032450	75	4	GT02	Indoor air, Durian, Mealybug	Indoor air, Durian, Mealybug, Day 4	Indoor air, Durian, Mealybug, Day 4-5	Before ripened	Indoor air, Durian, Mealybug, Before ripened
Red	-15.8184	-74.2726	-76.0495	8.04483	36.85	52.59	GT02_20250419_101409	1745032450	76	4	GT02	Indoor air, Durian, Mealybug	Indoor air, Durian, Mealybug, Day 4	Indoor air, Durian, Mealybug, Day 4-5	Before ripened	Indoor air, Durian, Mealybug, Before ripened
Red	-16.2975	-77.8383	-79.6733	7.14318	36.85	52.74	GT02_20250419_101409	1745032450	77	4	GT02	Indoor air, Durian, Mealybug	Indoor air, Durian, Mealybug, Day 4	Indoor air, Durian, Mealybug, Day 4-5	Before ripened	Indoor air, Durian, Mealybug, Before ripened
Red	-16.7127	-80.9286	-82.814	7.36175	36.85	52.87	GT02_20250419_101409	1745032450	78	4	GT02	Indoor air, Durian, Mealybug	Indoor air, Durian, Mealybug, Day 4	Indoor air, Durian, Mealybug, Day 4-5	Before ripened	Indoor air, Durian, Mealybug, Before ripened
Red	-15.5662	-79.982	-81.9304	8.50052	36.81	53.03	GT02_20250419_101409	1745032450	79	4	GT02	Indoor air, Durian, Mealybug	Indoor air, Durian, Mealybug, Day 4	Indoor air, Durian, Mealybug, Day 4-5	Before ripened	Indoor air, Durian, Mealybug, Before ripened
Red	-14.8537	-82.1214	-84.1047	8.95953	36.81	53.12	GT02_20250419_101409	1745032450	80	4	GT02	Indoor air, Durian, Mealybug	Indoor air, Durian, Mealybug, Day 4	Indoor air, Durian, Mealybug, Day 4-5	Before ripened	Indoor air, Durian, Mealybug, Before ripened
Red	-15.3009	-85.4494	-87.487	8.11798	36.81	53.26	GT02_20250419_101409	1745032450	81	4	GT02	Indoor air, Durian, Mealybug	Indoor air, Durian, Mealybug, Day 4	Indoor air, Durian, Mealybug, Day 4-5	Before ripened	Indoor air, Durian, Mealybug, Before ripened
Red	-14.5368	-85.4526	-87.5491	11.0417	36.78	53.41	GT02_20250419_101409	1745032450	82	4	GT02	Indoor air, Durian, Mealybug	Indoor air, Durian, Mealybug, Day 4	Indoor air, Durian, Mealybug, Day 4-5	Before ripened	Indoor air, Durian, Mealybug, Before ripened
Red	-13.6131	-85.2672	-86.4032	11.266	36.75	53.51	GT02_20250419_101409	1745032450	83	4	GT02	Indoor air, Durian, Mealybug	Indoor air, Durian, Mealybug, Day 4	Indoor air, Durian, Mealybug, Day 4-5	Before ripened	Indoor air, Durian, Mealybug, Before ripened
Red	-13.9955	-86.217	-87.3489	11.051	36.76	53.5	GT02_20250419_101409	1745032450	84	4	GT02	Indoor air, Durian, Mealybug	Indoor air, Durian, Mealybug, Day 4	Indoor air, Durian, Mealybug, Day 4-5	Before ripened	Indoor air, Durian, Mealybug, Before ripened
Red	-12.9112	-81.9403	-83.0417	12.0822	36.74	53.42	GT02_20250419_101409	1745032450	85	4	GT02	Indoor air, Durian, Mealybug	Indoor air, Durian, Mealybug, Day 4	Indoor air, Durian, Mealybug, Day 4-5	Before ripened	Indoor air, Durian, Mealybug, Before ripened
Red	-11.5075	-75.2864	-76.3185	13.7144	36.72	53.24	GT02_20250419_101409	1745032450	86	4	GT02	Indoor air, Durian, Mealybug	Indoor air, Durian, Mealybug, Day 4	Indoor air, Durian, Mealybug, Day 4-5	Before ripened	Indoor air, Durian, Mealybug, Before ripened
Red	-11.2954	-71.0588	-72.045	12.986	36.7	53.12	GT02_20250419_101409	1745032450	87	4	GT02	Indoor air, Durian, Mealybug	Indoor air, Durian, Mealybug, Day 4	Indoor air, Durian, Mealybug, Day 4-5	Before ripened	Indoor air, Durian, Mealybug, Before ripened
Red	-11.0718	-69.3947	-70.3538	12.4068	36.7	53.05	GT02_20250419_101409	1745032450	88	4	GT02	Indoor air, Durian, Mealybug	Indoor air, Durian, Mealybug, Day 4	Indoor air, Durian, Mealybug, Day 4-5	Before ripened	Indoor air, Durian, Mealybug, Before ripened
Red	-9.09571	-64.1703	-65.1423	12.6021	36.65	53.08	GT02_20250419_101409	1745032450	89	4	GT02	Indoor air, Durian, Mealybug	Indoor air, Durian, Mealybug, Day 4	Indoor air, Durian, Mealybug, Day 4-5	Before ripened	Indoor air, Durian, Mealybug, Before ripened
Red	-8.80909	-63.9337	-64.9214	12.6368	36.64	53.12	GT02_20250419_101409	1745032450	90	4	GT02	Indoor air, Durian, Mealybug	Indoor air, Durian, Mealybug, Day 4	Indoor air, Durian, Mealybug, Day 4-5	Before ripened	Indoor air, Durian, Mealybug, Before ripened
Red	-10.3832	-67.3098	-68.3166	11.0611	36.65	53.17	GT02_20250419_101409	1745032450	91	4	GT02	Indoor air, Durian, Mealybug	Indoor air, Durian, Mealybug, Day 4	Indoor air, Durian, Mealybug, Day 4-5	Before ripened	Indoor air, Durian, Mealybug, Before ripened
Red	-9.57483	-68.7361	-69.7662	10.7004	36.65	53.23	GT02_20250419_101409	1745032450	92	4	GT02	Indoor air, Durian, Mealybug	Indoor air, Durian, Mealybug, Day 4	Indoor air, Durian, Mealybug, Day 4-5	Before ripened	Indoor air, Durian, Mealybug, Before ripened
Red	-9.10892	-65.4123	-66.4667	11.4403	36.61	53.29	GT02_20250419_101409	1745032450	93	4	GT02	Indoor air, Durian, Mealybug	Indoor air, Durian, Mealybug, Day 4	Indoor air, Durian, Mealybug, Day 4-5	Before ripened	Indoor air, Durian, Mealybug, Before ripened
Red	-8.8223	-65.1756	-66.2458	11.475	36.6	53.33	GT02_20250419_101409	1745032450	94	4	GT02	Indoor air, Durian, Mealybug	Indoor air, Durian, Mealybug, Day 4	Indoor air, Durian, Mealybug, Day 4-5	Before ripened	Indoor air, Durian, Mealybug, Before ripened
Red	-9.30141	-68.7414	-69.8697	10.5734	36.6	53.48	GT02_20250419_101409	1745032450	95	4	GT02	Indoor air, Durian, Mealybug	Indoor air, Durian, Mealybug, Day 4	Indoor air, Durian, Mealybug, Day 4-5	Before ripened	Indoor air, Durian, Mealybug, Before ripened
Red	-8.53736	-68.7445	-69.9318	11.4971	36.57	53.63	GT02_20250419_101409	1745032450	96	4	GT02	Indoor air, Durian, Mealybug	Indoor air, Durian, Mealybug, Day 4	Indoor air, Durian, Mealybug, Day 4-5	Before ripened	Indoor air, Durian, Mealybug, Before ripened
Red	-8.41129	-71.5993	-72.8722	11.7249	36.55	53.85	GT02_20250419_101409	1745032450	97	4	GT02	Indoor air, Durian, Mealybug	Indoor air, Durian, Mealybug, Day 4	Indoor air, Durian, Mealybug, Day 4-5	Before ripened	Indoor air, Durian, Mealybug, Before ripened
Red	-7.28437	-72.5512	-74.8593	14.4591	36.54	53.94	GT02_20250419_101409	1745032450	98	4	GT02	Indoor air, Durian, Mealybug	Indoor air, Durian, Mealybug, Day 4	Indoor air, Durian, Mealybug, Day 4-5	Before ripened	Indoor air, Durian, Mealybug, Before ripened
Red	-7.34825	-73.0266	-75.3425	14.3389	36.54	53.96	GT02_20250419_101409	1745032450	99	4	GT02	Indoor air, Durian, Mealybug	Indoor air, Durian, Mealybug, Day 4	Indoor air, Durian, Mealybug, Day 4-5	Before ripened	Indoor air, Durian, Mealybug, Before ripened
Red	-5.30825	-68.3268	-69.6478	15.6544	36.49	53.97	GT02_20250419_101409	1745032450	100	4	GT02	Indoor air, Durian, Mealybug	Indoor air, Durian, Mealybug, Day 4	Indoor air, Durian, Mealybug, Day 4-5	Before ripened	Indoor air, Durian, Mealybug, Before ripened
Red	-2.94348	-84.7888	-85.854	121.06	36.71	55.32	GT02_20250420_101033	1745118634	71	5	GT02	Indoor air, Durian, Mealybug	Indoor air, Durian, Mealybug, Day 5	Indoor air, Durian, Mealybug, Day 4-5	Ripened	Indoor air, Durian, Mealybug, Ripened
Red	-1.95415	-79.3224	-80.3181	122.417	36.7	55.14	GT02_20250420_101033	1745118634	72	5	GT02	Indoor air, Durian, Mealybug	Indoor air, Durian, Mealybug, Day 5	Indoor air, Durian, Mealybug, Day 4-5	Ripened	Indoor air, Durian, Mealybug, Ripened
Red	-1.19908	-70.0536	-70.9375	118.711	36.68	54.85	GT02_20250420_101033	1745118634	73	5	GT02	Indoor air, Durian, Mealybug	Indoor air, Durian, Mealybug, Day 5	Indoor air, Durian, Mealybug, Day 4-5	Ripened	Indoor air, Durian, Mealybug, Ripened
Red	-3.31708	-61.7368	-62.5439	100.739	36.65	54.65	GT02_20250420_101033	1745118634	74	5	GT02	Indoor air, Durian, Mealybug	Indoor air, Durian, Mealybug, Day 5	Indoor air, Durian, Mealybug, Day 4-5	Ripened	Indoor air, Durian, Mealybug, Ripened
Red	-4.71105	-60.123	-60.9072	88.3743	36.64	54.59	GT02_20250420_101033	1745118634	75	5	GT02	Indoor air, Durian, Mealybug	Indoor air, Durian, Mealybug, Day 5	Indoor air, Durian, Mealybug, Day 4-5	Ripened	Indoor air, Durian, Mealybug, Ripened
Red	-5.41291	-63.45	-64.2687	87.5582	36.65	54.68	GT02_20250420_101033	1745118634	76	5	GT02	Indoor air, Durian, Mealybug	Indoor air, Durian, Mealybug, Day 5	Indoor air, Durian, Mealybug, Day 4-5	Ripened	Indoor air, Durian, Mealybug, Ripened
Red	-4.83966	-62.9766	-63.8269	87.6276	36.63	54.76	GT02_20250420_101033	1745118634	77	5	GT02	Indoor air, Durian, Mealybug	Indoor air, Durian, Mealybug, Day 5	Indoor air, Durian, Mealybug, Day 4-5	Ripened	Indoor air, Durian, Mealybug, Ripened
Red	-3.49	-64.1673	-65.0763	91.2762	36.61	54.91	GT02_20250420_101033	1745118634	78	5	GT02	Indoor air, Durian, Mealybug	Indoor air, Durian, Mealybug, Day 5	Indoor air, Durian, Mealybug, Day 4-5	Ripened	Indoor air, Durian, Mealybug, Ripened
Red	-3.42696	-65.5947	-66.5465	96.8901	36.6	55.02	GT02_20250420_101033	1745118634	79	5	GT02	Indoor air, Durian, Mealybug	Indoor air, Durian, Mealybug, Day 5	Indoor air, Durian, Mealybug, Day 4-5	Ripened	Indoor air, Durian, Mealybug, Ripened
Red	-1.40738	-63.6962	-64.6759	100.295	36.57	55.09	GT02_20250420_101033	1745118634	80	5	GT02	Indoor air, Durian, Mealybug	Indoor air, Durian, Mealybug, Day 5	Indoor air, Durian, Mealybug, Day 4-5	Ripened	Indoor air, Durian, Mealybug, Ripened
Red	-0.451683	-62.2731	-63.2884	101.579	36.54	55.18	GT02_20250420_101033	1745118634	81	5	GT02	Indoor air, Durian, Mealybug	Indoor air, Durian, Mealybug, Day 5	Indoor air, Durian, Mealybug, Day 4-5	Ripened	Indoor air, Durian, Mealybug, Ripened
Red	-0.866919	-65.3634	-66.4291	104.798	36.54	55.31	GT02_20250420_101033	1745118634	82	5	GT02	Indoor air, Durian, Mealybug	Indoor air, Durian, Mealybug, Day 5	Indoor air, Durian, Mealybug, Day 4-5	Ripened	Indoor air, Durian, Mealybug, Ripened
Red	-1.25021	-68.2159	-69.3282	109.076	36.54	55.43	GT02_20250420_101033	1745118634	83	5	GT02	Indoor air, Durian, Mealybug	Indoor air, Durian, Mealybug, Day 5	Indoor air, Durian, Mealybug, Day 4-5	Ripened	Indoor air, Durian, Mealybug, Ripened
Red	0.545779	-67.9814	-68.1487	112.06	36.51	55.57	GT02_20250420_101033	1745118634	84	5	GT02	Indoor air, Durian, Mealybug	Indoor air, Durian, Mealybug, Day 5	Indoor air, Durian, Mealybug, Day 4-5	Ripened	Indoor air, Durian, Mealybug, Ripened
Red	1.9389	-71.498	-72.7389	118.918	36.51	55.76	GT02_20250420_101033	1745118634	85	5	GT02	Indoor air, Durian, Mealybug	Indoor air, Durian, Mealybug, Day 5	Indoor air, Durian, Mealybug, Day 4-5	Ripened	Indoor air, Durian, Mealybug, Ripened
Red	4.27704	-69.1251	-70.4058	124.418	36.47	55.86	GT02_20250420_101033	1745118634	86	5	GT02	Indoor air, Durian, Mealybug	Indoor air, Durian, Mealybug, Day 5	Indoor air, Durian, Mealybug, Day 4-5	Ripened	Indoor air, Durian, Mealybug, Ripened
Red	3.83071	-70.5503	-71.8346	124.082	36.48	55.87	GT02_20250420_101033	1745118634	87	5	GT02	Indoor air, Durian, Mealybug	Indoor air, Durian, Mealybug, Day 5	Indoor air, Durian, Mealybug, Day 4-5	Ripened	Indoor air, Durian, Mealybug, Ripened
Red	5.68076	-63.4712	-63.6827	126.05	36.45	55.68	GT02_20250420_101033	1745118634	88	5	GT02	Indoor air, Durian, Mealybug	Indoor air, Durian, Mealybug, Day 5	Indoor air, Durian, Mealybug, Day 4-5	Ripened	Indoor air, Durian, Mealybug, Ripened
Red	5.51123	-57.2906	-57.4013	120.613	36.45	55.42	GT02_20250420_101033	1745118634	89	5	GT02	Indoor air, Durian, Mealybug	Indoor air, Durian, Mealybug, Day 5	Indoor air, Durian, Mealybug, Day 4-5	Ripened	Indoor air, Durian, Mealybug, Ripened
Red	3.13854	-48.9727	-48.9871	103.666	36.43	55.17	GT02_20250420_101033	1745118634	90	5	GT02	Indoor air, Durian, Mealybug	Indoor air, Durian, Mealybug, Day 5	Indoor air, Durian, Mealybug, Day 4-5	Ripened	Indoor air, Durian, Mealybug, Ripened
Red	3.82889	-42.0822	-43.0431	89.3327	36.4	55.03	GT02_20250420_101033	1745118634	91	5	GT02	Indoor air, Durian, Mealybug	Indoor air, Durian, Mealybug, Day 5	Indoor air, Durian, Mealybug, Day 4-5	Ripened	Indoor air, Durian, Mealybug, Ripened
Red	1.30716	-41.4192	-41.3726	79.728	36.39	55.01	GT02_20250420_101033	1745118634	92	5	GT02	Indoor air, Durian, Mealybug	Indoor air, Durian, Mealybug, Day 5	Indoor air, Durian, Mealybug, Day 4-5	Ripened	Indoor air, Durian, Mealybug, Ripened
Red	1.24328	-41.8946	-42.8558	79.6078	36.39	55.03	GT02_20250420_101033	1745118634	93	5	GT02	Indoor air, Durian, Mealybug	Indoor air, Durian, Mealybug, Day 5	Indoor air, Durian, Mealybug, Day 4-5	Ripened	Indoor air, Durian, Mealybug, Ripened
Red	2.83611	-39.5228	-40.5434	80.0818	36.34	55.18	GT02_20250420_101033	1745118634	94	5	GT02	Indoor air, Durian, Mealybug	Indoor air, Durian, Mealybug, Day 5	Indoor air, Durian, Mealybug, Day 4-5	Ripened	Indoor air, Durian, Mealybug, Ripened
Red	2.35699	-43.0885	-44.1672	83.1802	36.34	55.33	GT02_20250420_101033	1745118634	95	5	GT02	Indoor air, Durian, Mealybug	Indoor air, Durian, Mealybug, Day 5	Indoor air, Durian, Mealybug, Day 4-5	Ripened	Indoor air, Durian, Mealybug, Ripened
Red	3.26032	-45.7045	-46.8454	90.4936	36.33	55.49	GT02_20250420_101033	1745118634	96	5	GT02	Indoor air, Durian, Mealybug	Indoor air, Durian, Mealybug, Day 5	Indoor air, Durian, Mealybug, Day 4-5	Ripened	Indoor air, Durian, Mealybug, Ripened
Red	3.71732	-49.7456	-50.9525	95.4717	36.33	55.66	GT02_20250420_101033	1745118634	97	5	GT02	Indoor air, Durian, Mealybug	Indoor air, Durian, Mealybug, Day 5	Indoor air, Durian, Mealybug, Day 4-5	Ripened	Indoor air, Durian, Mealybug, Ripened
Red	6.83188	-49.0367	-50.3105	104.55	36.29	55.83	GT02_20250420_101033	1745118634	98	5	GT02	Indoor air, Durian, Mealybug	Indoor air, Durian, Mealybug, Day 5	Indoor air, Durian, Mealybug, Day 4-5	Ripened	Indoor air, Durian, Mealybug, Ripened
Red	7.1496	-50.4651	-51.8014	107.139	36.27	55.99	GT02_20250420_101033	1745118634	99	5	GT02	Indoor air, Durian, Mealybug	Indoor air, Durian, Mealybug, Day 5	Indoor air, Durian, Mealybug, Day 4-5	Ripened	Indoor air, Durian, Mealybug, Ripened
Red	8.94559	-50.2306	-51.6219	113.123	36.24	56.13	GT02_20250420_101033	1745118634	100	5	GT02	Indoor air, Durian, Mealybug	Indoor air, Durian, Mealybug, Day 5	Indoor air, Durian, Mealybug, Day 4-5	Ripened	Indoor air, Durian, Mealybug, Ripened
Red	-4.95512	-43.3597	-39.2135	136.151	37.48	50.81	GT02_20250421_090720	1.7452e+09	71	6	GT02	Indoor air, Durian, Mealybug	Indoor air, Durian, Mealybug, Day 6	Indoor air, Durian, Mealybug, Day 6-7	Ripened	Indoor air, Durian, Mealybug, Ripened
Red	-2.87165	-40.9858	-36.8597	140.676	37.45	50.86	GT02_20250421_090720	1.7452e+09	72	6	GT02	Indoor air, Durian, Mealybug	Indoor air, Durian, Mealybug, Day 6	Indoor air, Durian, Mealybug, Day 6-7	Ripened	Indoor air, Durian, Mealybug, Ripened
Red	-2.04372	-40.5135	-36.4387	140.72	37.42	50.99	GT02_20250421_090720	1.7452e+09	73	6	GT02	Indoor air, Durian, Mealybug	Indoor air, Durian, Mealybug, Day 6	Indoor air, Durian, Mealybug, Day 6-7	Ripened	Indoor air, Durian, Mealybug, Ripened
Red	-0.85292	-40.99	-36.9425	142.575	37.41	51.06	GT02_20250421_090720	1.7452e+09	74	6	GT02	Indoor air, Durian, Mealybug	Indoor air, Durian, Mealybug, Day 6	Indoor air, Durian, Mealybug, Day 6-7	Ripened	Indoor air, Durian, Mealybug, Ripened
Red	-0.852074	-39.0872	-34.9891	143.081	37.42	50.93	GT02_20250421_090720	1.7452e+09	75	6	GT02	Indoor air, Durian, Mealybug	Indoor air, Durian, Mealybug, Day 6	Indoor air, Durian, Mealybug, Day 6-7	Ripened	Indoor air, Durian, Mealybug, Ripened
Red	1.69984	-28.6812	-23.4756	145.865	37.38	50.65	GT02_20250421_090720	1.7452e+09	76	6	GT02	Indoor air, Durian, Mealybug	Indoor air, Durian, Mealybug, Day 6	Indoor air, Durian, Mealybug, Day 6-7	Ripened	Indoor air, Durian, Mealybug, Ripened
Red	-0.98075	-26.304	-21.0597	131.466	37.38	50.55	GT02_20250421_090720	1.7452e+09	77	6	GT02	Indoor air, Durian, Mealybug	Indoor air, Durian, Mealybug, Day 6	Indoor air, Durian, Mealybug, Day 6-7	Ripened	Indoor air, Durian, Mealybug, Ripened
Red	-2.58594	-27.015	-21.7431	120.336	37.4	50.48	GT02_20250421_090720	1.7452e+09	78	6	GT02	Indoor air, Durian, Mealybug	Indoor air, Durian, Mealybug, Day 6	Indoor air, Durian, Mealybug, Day 6-7	Ripened	Indoor air, Durian, Mealybug, Ripened
Red	-1.41817	-21.3643	-16.082	114.892	37.35	50.45	GT02_20250421_090720	1.7452e+09	79	6	GT02	Indoor air, Durian, Mealybug	Indoor air, Durian, Mealybug, Day 6	Indoor air, Durian, Mealybug, Day 6-7	Ripened	Indoor air, Durian, Mealybug, Ripened
Red	-1.58939	-18.9893	-13.7075	115.442	37.33	50.45	GT02_20250421_090720	1.7452e+09	80	6	GT02	Indoor air, Durian, Mealybug	Indoor air, Durian, Mealybug, Day 6	Indoor air, Durian, Mealybug, Day 6-7	Ripened	Indoor air, Durian, Mealybug, Ripened
Red	-2.29125	-22.3163	-17.0691	114.626	37.34	50.54	GT02_20250421_090720	1.7452e+09	81	6	GT02	Indoor air, Durian, Mealybug	Indoor air, Durian, Mealybug, Day 6	Indoor air, Durian, Mealybug, Day 6-7	Ripened	Indoor air, Durian, Mealybug, Ripened
Red	-1.30361	-20.6554	-15.44	114.971	37.31	50.62	GT02_20250421_090720	1.7452e+09	82	6	GT02	Indoor air, Durian, Mealybug	Indoor air, Durian, Mealybug, Day 6	Indoor air, Durian, Mealybug, Day 6-7	Ripened	Indoor air, Durian, Mealybug, Ripened
Red	-1.3364	-22.7959	-17.6351	115.404	37.3	50.76	GT02_20250421_090720	1.7452e+09	83	6	GT02	Indoor air, Durian, Mealybug	Indoor air, Durian, Mealybug, Day 6	Indoor air, Durian, Mealybug, Day 6-7	Ripened	Indoor air, Durian, Mealybug, Ripened
Red	-0.412643	-21.6105	-16.4892	120.629	37.27	50.86	GT02_20250421_090720	1.7452e+09	84	6	GT02	Indoor air, Durian, Mealybug	Indoor air, Durian, Mealybug, Day 6	Indoor air, Durian, Mealybug, Day 6-7	Ripened	Indoor air, Durian, Mealybug, Ripened
Red	-2.16687	-28.9765	-23.9164	121.842	37.3	51.02	GT02_20250421_090720	1.7452e+09	85	6	GT02	Indoor air, Durian, Mealybug	Indoor air, Durian, Mealybug, Day 6	Indoor air, Durian, Mealybug, Day 6-7	Ripened	Indoor air, Durian, Mealybug, Ripened
Red	-1.16772	-30.8793	-25.8698	124.335	37.29	51.15	GT02_20250421_090720	1.7452e+09	86	6	GT02	Indoor air, Durian, Mealybug	Indoor air, Durian, Mealybug, Day 6	Indoor air, Durian, Mealybug, Day 6-7	Ripened	Indoor air, Durian, Mealybug, Ripened
Red	0.819922	-29.2185	-24.2408	132.68	37.26	51.23	GT02_20250421_090720	1.7452e+09	87	6	GT02	Indoor air, Durian, Mealybug	Indoor air, Durian, Mealybug, Day 6	Indoor air, Durian, Mealybug, Day 6-7	Ripened	Indoor air, Durian, Mealybug, Ripened
Red	3.19001	-26.6079	-21.6661	139.239	37.22	51.32	GT02_20250421_090720	1.7452e+09	88	6	GT02	Indoor air, Durian, Mealybug	Indoor air, Durian, Mealybug, Day 6	Indoor air, Durian, Mealybug, Day 6-7	Ripened	Indoor air, Durian, Mealybug, Ripened
Red	3.55203	-29.4594	-24.5445	143.543	37.23	51.39	GT02_20250421_090720	1.7452e+09	89	6	GT02	Indoor air, Durian, Mealybug	Indoor air, Durian, Mealybug, Day 6	Indoor air, Durian, Mealybug, Day 6-7	Ripened	Indoor air, Durian, Mealybug, Ripened
Red	3.71089	-30.1736	-25.2899	143.338	37.22	51.47	GT02_20250421_090720	1.7452e+09	90	6	GT02	Indoor air, Durian, Mealybug	Indoor air, Durian, Mealybug, Day 6	Indoor air, Durian, Mealybug, Day 6-7	Ripened	Indoor air, Durian, Mealybug, Ripened
Red	4.41191	-28.7494	-22.8818	143.647	37.2	51.51	GT02_20250421_090720	1.7452e+09	91	6	GT02	Indoor air, Durian, Mealybug	Indoor air, Durian, Mealybug, Day 6	Indoor air, Durian, Mealybug, Day 6-7	Ripened	Indoor air, Durian, Mealybug, Ripened
Red	6.23002	-20.908	-14.9714	145.555	37.17	51.33	GT02_20250421_090720	1.7452e+09	92	6	GT02	Indoor air, Durian, Mealybug	Indoor air, Durian, Mealybug, Day 6	Indoor air, Durian, Mealybug, Day 6-7	Ripened	Indoor air, Durian, Mealybug, Ripened
Red	5.52985	-21.4294	-14.4261	141.751	37.2	51.16	GT02_20250421_090720	1.7452e+09	93	6	GT02	Indoor air, Durian, Mealybug	Indoor air, Durian, Mealybug, Day 6	Indoor air, Durian, Mealybug, Day 6-7	Ripened	Indoor air, Durian, Mealybug, Ripened
Red	5.46336	-10.9763	-4.92036	132.244	37.14	51.02	GT02_20250421_090720	1.7452e+09	94	6	GT02	Indoor air, Durian, Mealybug	Indoor air, Durian, Mealybug, Day 6	Indoor air, Durian, Mealybug, Day 6-7	Ripened	Indoor air, Durian, Mealybug, Ripened
Red	5.03746	-8.60022	-3.52516	122.819	37.13	50.97	GT02_20250421_090720	1.7452e+09	95	6	GT02	Indoor air, Durian, Mealybug	Indoor air, Durian, Mealybug, Day 6	Indoor air, Durian, Mealybug, Day 6-7	Ripened	Indoor air, Durian, Mealybug, Ripened
Red	4.51573	-6.93728	-1.85472	116.215	37.12	50.95	GT02_20250421_090720	1.7452e+09	96	6	GT02	Indoor air, Durian, Mealybug	Indoor air, Durian, Mealybug, Day 6	Indoor air, Durian, Mealybug, Day 6-7	Ripened	Indoor air, Durian, Mealybug, Ripened
Red	3.74999	-10.7397	-5.69947	115.278	37.13	51.06	GT02_20250421_090720	1.7452e+09	97	6	GT02	Indoor air, Durian, Mealybug	Indoor air, Durian, Mealybug, Day 6	Indoor air, Durian, Mealybug, Day 6-7	Ripened	Indoor air, Durian, Mealybug, Ripened
Red	4.83345	-8.36569	-4.34566	115.803	37.1	51.11	GT02_20250421_090720	1.7452e+09	98	6	GT02	Indoor air, Durian, Mealybug	Indoor air, Durian, Mealybug, Day 6	Indoor air, Durian, Mealybug, Day 6-7	Ripened	Indoor air, Durian, Mealybug, Ripened
Red	5.62944	-9.13117	-4.16616	116.787	37.07	51.25	GT02_20250421_090720	1.7452e+09	99	6	GT02	Indoor air, Durian, Mealybug	Indoor air, Durian, Mealybug, Day 6	Indoor air, Durian, Mealybug, Day 6-7	Ripened	Indoor air, Durian, Mealybug, Ripened
Red	6.43779	-10.5575	-4.6157	120.426	37.07	51.31	GT02_20250421_090720	1.7452e+09	100	6	GT02	Indoor air, Durian, Mealybug	Indoor air, Durian, Mealybug, Day 6	Indoor air, Durian, Mealybug, Day 6-7	Ripened	Indoor air, Durian, Mealybug, Ripened
Red	18.2148	-32.5664	-26.7734	148.419	37.13	51.98	GT02_20250422_082910	1.74529e+09	71	7	GT02	Indoor air, Durian, Mealybug	Indoor air, Durian, Mealybug, Day 7	Indoor air, Durian, Mealybug, Day 6-7	Ripened	Indoor air, Durian, Mealybug, Ripened
Red	18.5564	-39.2192	-33.4758	153.812	37.16	52.11	GT02_20250422_082910	1.74529e+09	72	7	GT02	Indoor air, Durian, Mealybug	Indoor air, Durian, Mealybug, Day 7	Indoor air, Durian, Mealybug, Day 6-7	Ripened	Indoor air, Durian, Mealybug, Ripened
Red	20.3524	-37.9847	-32.2963	158.796	37.13	52.25	GT02_20250422_082910	1.74529e+09	73	7	GT02	Indoor air, Durian, Mealybug	Indoor air, Durian, Mealybug, Day 7	Indoor air, Durian, Mealybug, Day 6-7	Ripened	Indoor air, Durian, Mealybug, Ripened
Red	22.1803	-37.5124	-31.8752	163.84	37.1	52.38	GT02_20250422_082910	1.74529e+09	74	7	GT02	Indoor air, Durian, Mealybug	Indoor air, Durian, Mealybug, Day 7	Indoor air, Durian, Mealybug, Day 6-7	Ripened	Indoor air, Durian, Mealybug, Ripened
Red	21.9567	-39.1764	-32.5663	163.419	37.1	52.45	GT02_20250422_082910	1.74529e+09	75	7	GT02	Indoor air, Durian, Mealybug	Indoor air, Durian, Mealybug, Day 7	Indoor air, Durian, Mealybug, Day 6-7	Ripened	Indoor air, Durian, Mealybug, Ripened
Red	24.2531	-29.6721	-22.9855	165.722	37.06	52.25	GT02_20250422_082910	1.74529e+09	76	7	GT02	Indoor air, Durian, Mealybug	Indoor air, Durian, Mealybug, Day 7	Indoor air, Durian, Mealybug, Day 6-7	Ripened	Indoor air, Durian, Mealybug, Ripened
Red	24.86	-25.1555	-18.3953	161.864	37.06	52.06	GT02_20250422_082910	1.74529e+09	77	7	GT02	Indoor air, Durian, Mealybug	Indoor air, Durian, Mealybug, Day 7	Indoor air, Durian, Mealybug, Day 6-7	Ripened	Indoor air, Durian, Mealybug, Ripened
Red	22.3391	-21.5898	-15.7715	142.765	37.06	51.91	GT02_20250422_082910	1.74529e+09	78	7	GT02	Indoor air, Durian, Mealybug	Indoor air, Durian, Mealybug, Day 7	Indoor air, Durian, Mealybug, Day 6-7	Ripened	Indoor air, Durian, Mealybug, Ripened
Red	20.5831	-16.1245	-10.2563	135.097	37.04	51.78	GT02_20250422_082910	1.74529e+09	79	7	GT02	Indoor air, Durian, Mealybug	Indoor air, Durian, Mealybug, Day 7	Indoor air, Durian, Mealybug, Day 6-7	Ripened	Indoor air, Durian, Mealybug, Ripened
Red	20.4447	-12.6089	-5.68678	131.214	37.03	51.64	GT02_20250422_082910	1.74529e+09	80	7	GT02	Indoor air, Durian, Mealybug	Indoor air, Durian, Mealybug, Day 7	Indoor air, Durian, Mealybug, Day 6-7	Ripened	Indoor air, Durian, Mealybug, Ripened
Red	19.3578	-5.95716	-1.00505	121.795	36.99	51.56	GT02_20250422_082910	1.74529e+09	81	7	GT02	Indoor air, Durian, Mealybug	Indoor air, Durian, Mealybug, Day 7	Indoor air, Durian, Mealybug, Day 6-7	Ripened	Indoor air, Durian, Mealybug, Ripened
Red	19.1023	-7.85888	-2.93777	121.314	36.99	51.64	GT02_20250422_082910	1.74529e+09	82	7	GT02	Indoor air, Durian, Mealybug	Indoor air, Durian, Mealybug, Day 7	Indoor air, Durian, Mealybug, Day 6-7	Ripened	Indoor air, Durian, Mealybug, Ripened
Red	18.4323	-11.9481	-6.05774	120.558	37	51.72	GT02_20250422_082910	1.74529e+09	83	7	GT02	Indoor air, Durian, Mealybug	Indoor air, Durian, Mealybug, Day 7	Indoor air, Durian, Mealybug, Day 6-7	Ripened	Indoor air, Durian, Mealybug, Ripened
Red	19.5469	-11.2392	-5.41576	123.637	36.96	51.89	GT02_20250422_082910	1.74529e+09	84	7	GT02	Indoor air, Durian, Mealybug	Indoor air, Durian, Mealybug, Day 7	Indoor air, Durian, Mealybug, Day 6-7	Ripened	Indoor air, Durian, Mealybug, Ripened
Red	19.1112	-18.1308	-12.3805	127.945	36.98	52.08	GT02_20250422_082910	1.74529e+09	85	7	GT02	Indoor air, Durian, Mealybug	Indoor air, Durian, Mealybug, Day 7	Indoor air, Durian, Mealybug, Day 6-7	Ripened	Indoor air, Durian, Mealybug, Ripened
Red	20.7475	-18.0849	-13.4089	136.628	36.95	52.27	GT02_20250422_082910	1.74529e+09	86	7	GT02	Indoor air, Durian, Mealybug	Indoor air, Durian, Mealybug, Day 7	Indoor air, Durian, Mealybug, Day 6-7	Ripened	Indoor air, Durian, Mealybug, Ripened
Red	23.0333	-19.751	-14.1415	142.156	36.93	52.44	GT02_20250422_082910	1.74529e+09	87	7	GT02	Indoor air, Durian, Mealybug	Indoor air, Durian, Mealybug, Day 7	Indoor air, Durian, Mealybug, Day 6-7	Ripened	Indoor air, Durian, Mealybug, Ripened
Red	24.0644	-21.4161	-15.8533	149.71	36.92	52.56	GT02_20250422_082910	1.74529e+09	88	7	GT02	Indoor air, Durian, Mealybug	Indoor air, Durian, Mealybug, Day 7	Indoor air, Durian, Mealybug, Day 6-7	Ripened	Indoor air, Durian, Mealybug, Ripened
Red	24.5214	-24.4572	-18.9603	153.688	36.92	52.73	GT02_20250422_082910	1.74529e+09	89	7	GT02	Indoor air, Durian, Mealybug	Indoor air, Durian, Mealybug, Day 7	Indoor air, Durian, Mealybug, Day 6-7	Ripened	Indoor air, Durian, Mealybug, Ripened
Red	27.3174	-24.2227	-18.7808	158.672	36.89	52.87	GT02_20250422_082910	1.74529e+09	90	7	GT02	Indoor air, Durian, Mealybug	Indoor air, Durian, Mealybug, Day 7	Indoor air, Durian, Mealybug, Day 6-7	Ripened	Indoor air, Durian, Mealybug, Ripened
Red	27.998	-26.5998	-21.1967	164.071	36.89	52.97	GT02_20250422_082910	1.74529e+09	91	7	GT02	Indoor air, Durian, Mealybug	Indoor air, Durian, Mealybug, Day 7	Indoor air, Durian, Mealybug, Day 6-7	Ripened	Indoor air, Durian, Mealybug, Ripened
Red	28.7637	-22.7975	-16.352	165.007	36.88	52.86	GT02_20250422_082910	1.74529e+09	92	7	GT02	Indoor air, Durian, Mealybug	Indoor air, Durian, Mealybug, Day 7	Indoor air, Durian, Mealybug, Day 6-7	Ripened	Indoor air, Durian, Mealybug, Ripened
Red	29.2109	-19.4695	-12.9697	165.849	36.88	52.72	GT02_20250422_082910	1.74529e+09	93	7	GT02	Indoor air, Durian, Mealybug	Indoor air, Durian, Mealybug, Day 7	Indoor air, Durian, Mealybug, Day 6-7	Ripened	Indoor air, Durian, Mealybug, Ripened
Red	29.9012	-12.5789	-6.0257	151.516	36.85	52.58	GT02_20250422_082910	1.74529e+09	94	7	GT02	Indoor air, Durian, Mealybug	Indoor air, Durian, Mealybug, Day 7	Indoor air, Durian, Mealybug, Day 6-7	Ripened	Indoor air, Durian, Mealybug, Ripened
Red	28.0814	-7.58901	-0.993703	146.727	36.83	52.47	GT02_20250422_082910	1.74529e+09	95	7	GT02	Indoor air, Durian, Mealybug	Indoor air, Durian, Mealybug, Day 7	Indoor air, Durian, Mealybug, Day 6-7	Ripened	Indoor air, Durian, Mealybug, Ripened
Red	27.7513	-4.49978	1.12627	139.483	36.82	52.39	GT02_20250422_082910	1.74529e+09	96	7	GT02	Indoor air, Durian, Mealybug	Indoor air, Durian, Mealybug, Day 7	Indoor air, Durian, Mealybug, Day 6-7	Ripened	Indoor air, Durian, Mealybug, Ripened
Red	26.2934	-2.36141	3.27988	131.999	36.81	52.35	GT02_20250422_082910	1.74529e+09	97	7	GT02	Indoor air, Durian, Mealybug	Indoor air, Durian, Mealybug, Day 7	Indoor air, Durian, Mealybug, Day 6-7	Ripened	Indoor air, Durian, Mealybug, Ripened
Red	26.8986	-2.65039	2.96326	132.128	36.79	52.42	GT02_20250422_082910	1.74529e+09	98	7	GT02	Indoor air, Durian, Mealybug	Indoor air, Durian, Mealybug, Day 7	Indoor air, Durian, Mealybug, Day 6-7	Ripened	Indoor air, Durian, Mealybug, Ripened
Red	26.9617	-4.07774	1.49302	131.742	36.78	52.53	GT02_20250422_082910	1.74529e+09	99	7	GT02	Indoor air, Durian, Mealybug	Indoor air, Durian, Mealybug, Day 7	Indoor air, Durian, Mealybug, Day 6-7	Ripened	Indoor air, Durian, Mealybug, Ripened
Red	27.7896	-3.6055	1.91411	136.786	36.75	52.66	GT02_20250422_082910	1.74529e+09	100	7	GT02	Indoor air, Durian, Mealybug	Indoor air, Durian, Mealybug, Day 7	Indoor air, Durian, Mealybug, Day 6-7	Ripened	Indoor air, Durian, Mealybug, Ripened
Red	66.386	4.69547	14.7013	186	37.14	50.74	GT02_20250423_093940	1.74538e+09	71	8	GT02	Indoor air, Durian, Mealybug	Indoor air, Durian, Mealybug, Day 8	Indoor air, Durian, Mealybug, Day 8-9	After ripened	Indoor air, Durian, Mealybug, After ripened
Red	66.5129	3.74355	13.7143	189.734	37.13	50.83	GT02_20250423_093940	1.74538e+09	72	8	GT02	Indoor air, Durian, Mealybug	Indoor air, Durian, Mealybug, Day 8	Indoor air, Durian, Mealybug, Day 8-9	After ripened	Indoor air, Durian, Mealybug, After ripened
Red	68.9273	5.93106	15.9015	191.009	37.12	50.83	GT02_20250423_093940	1.74538e+09	73	8	GT02	Indoor air, Durian, Mealybug	Indoor air, Durian, Mealybug, Day 8	Indoor air, Durian, Mealybug, Day 8-9	After ripened	Indoor air, Durian, Mealybug, After ripened
Red	70.3089	4.97808	14.8938	194.718	37.1	50.97	GT02_20250423_093940	1.74538e+09	74	8	GT02	Indoor air, Durian, Mealybug	Indoor air, Durian, Mealybug, Day 8	Indoor air, Durian, Mealybug, Day 8-9	After ripened	Indoor air, Durian, Mealybug, After ripened
Red	70.0214	2.83864	12.7195	197.177	37.1	51.06	GT02_20250423_093940	1.74538e+09	75	8	GT02	Indoor air, Durian, Mealybug	Indoor air, Durian, Mealybug, Day 8	Indoor air, Durian, Mealybug, Day 8-9	After ripened	Indoor air, Durian, Mealybug, After ripened
Red	74.7216	3.36003	14.1742	202.981	37.07	51.23	GT02_20250423_093940	1.74538e+09	76	8	GT02	Indoor air, Durian, Mealybug	Indoor air, Durian, Mealybug, Day 8	Indoor air, Durian, Mealybug, Day 8-9	After ripened	Indoor air, Durian, Mealybug, After ripened
Red	76.4537	4.11912	13.8705	213.844	37.04	51.39	GT02_20250423_093940	1.74538e+09	77	8	GT02	Indoor air, Durian, Mealybug	Indoor air, Durian, Mealybug, Day 8	Indoor air, Durian, Mealybug, Day 8-9	After ripened	Indoor air, Durian, Mealybug, After ripened
Red	78.9	5.54435	17.2994	214.179	37.03	51.38	GT02_20250423_093940	1.74538e+09	78	8	GT02	Indoor air, Durian, Mealybug	Indoor air, Durian, Mealybug, Day 8	Indoor air, Durian, Mealybug, Day 8-9	After ripened	Indoor air, Durian, Mealybug, After ripened
Red	79.1875	8.68379	20.4737	214.72	37.03	51.29	GT02_20250423_093940	1.74538e+09	79	8	GT02	Indoor air, Durian, Mealybug	Indoor air, Durian, Mealybug, Day 8	Indoor air, Durian, Mealybug, Day 8-9	After ripened	Indoor air, Durian, Mealybug, After ripened
Red	79.4422	9.68273	20.453	205.695	37.02	51.34	GT02_20250423_093940	1.74538e+09	80	8	GT02	Indoor air, Durian, Mealybug	Indoor air, Durian, Mealybug, Day 8	Indoor air, Durian, Mealybug, Day 8-9	After ripened	Indoor air, Durian, Mealybug, After ripened
Red	81.0358	13.9573	25.7188	205.675	36.98	51.36	GT02_20250423_093940	1.74538e+09	81	8	GT02	Indoor air, Durian, Mealybug	Indoor air, Durian, Mealybug, Day 8	Indoor air, Durian, Mealybug, Day 8-9	After ripened	Indoor air, Durian, Mealybug, After ripened
Red	80.5895	12.5321	24.29	203.34	36.99	51.37	GT02_20250423_093940	1.74538e+09	82	8	GT02	Indoor air, Durian, Mealybug	Indoor air, Durian, Mealybug, Day 8	Indoor air, Durian, Mealybug, Day 8-9	After ripened	Indoor air, Durian, Mealybug, After ripened
Red	80.7484	12.8179	23.5445	201.134	36.98	51.45	GT02_20250423_093940	1.74538e+09	83	8	GT02	Indoor air, Durian, Mealybug	Indoor air, Durian, Mealybug, Day 8	Indoor air, Durian, Mealybug, Day 8-9	After ripened	Indoor air, Durian, Mealybug, After ripened
Red	80.1423	10.2041	21.9077	200.498	36.99	51.51	GT02_20250423_093940	1.74538e+09	84	8	GT02	Indoor air, Durian, Mealybug	Indoor air, Durian, Mealybug, Day 8	Indoor air, Durian, Mealybug, Day 8-9	After ripened	Indoor air, Durian, Mealybug, After ripened
Red	81.7679	15.7164	26.4151	201.539	36.95	51.52	GT02_20250423_093940	1.74538e+09	85	8	GT02	Indoor air, Durian, Mealybug	Indoor air, Durian, Mealybug, Day 8	Indoor air, Durian, Mealybug, Day 8-9	After ripened	Indoor air, Durian, Mealybug, After ripened
Red	83.6402	14.7656	26.4488	203.298	36.95	51.56	GT02_20250423_093940	1.74538e+09	86	8	GT02	Indoor air, Durian, Mealybug	Indoor air, Durian, Mealybug, Day 8	Indoor air, Durian, Mealybug, Day 8-9	After ripened	Indoor air, Durian, Mealybug, After ripened
Red	84.7875	18.615	29.2857	203.944	36.92	51.59	GT02_20250423_093940	1.74538e+09	87	8	GT02	Indoor air, Durian, Mealybug	Indoor air, Durian, Mealybug, Day 8	Indoor air, Durian, Mealybug, Day 8-9	After ripened	Indoor air, Durian, Mealybug, After ripened
Red	85.6163	20.99	31.6602	206.494	36.9	51.59	GT02_20250423_093940	1.74538e+09	88	8	GT02	Indoor air, Durian, Mealybug	Indoor air, Durian, Mealybug, Day 8	Indoor air, Durian, Mealybug, Day 8-9	After ripened	Indoor air, Durian, Mealybug, After ripened
Red	87.0937	21.7502	32.3773	206.383	36.88	51.7	GT02_20250423_093940	1.74538e+09	89	8	GT02	Indoor air, Durian, Mealybug	Indoor air, Durian, Mealybug, Day 8	Indoor air, Durian, Mealybug, Day 8-9	After ripened	Indoor air, Durian, Mealybug, After ripened
Red	87.667	22.2235	33.819	207.452	36.86	51.78	GT02_20250423_093940	1.74538e+09	90	8	GT02	Indoor air, Durian, Mealybug	Indoor air, Durian, Mealybug, Day 8	Indoor air, Durian, Mealybug, Day 8-9	After ripened	Indoor air, Durian, Mealybug, After ripened
Red	88.1879	18.6577	31.1952	210.551	36.86	51.93	GT02_20250423_093940	1.74538e+09	91	8	GT02	Indoor air, Durian, Mealybug	Indoor air, Durian, Mealybug, Day 8	Indoor air, Durian, Mealybug, Day 8-9	After ripened	Indoor air, Durian, Mealybug, After ripened
Red	90.4425	19.6567	31.1745	214.525	36.85	51.98	GT02_20250423_093940	1.74538e+09	92	8	GT02	Indoor air, Durian, Mealybug	Indoor air, Durian, Mealybug, Day 8	Indoor air, Durian, Mealybug, Day 8-9	After ripened	Indoor air, Durian, Mealybug, After ripened
Red	91.3033	22.2694	34.7906	215.136	36.83	51.97	GT02_20250423_093940	1.74538e+09	93	8	GT02	Indoor air, Durian, Mealybug	Indoor air, Durian, Mealybug, Day 8	Indoor air, Durian, Mealybug, Day 8-9	After ripened	Indoor air, Durian, Mealybug, After ripened
Red	91.9421	28.0237	39.6224	216.338	36.83	51.77	GT02_20250423_093940	1.74538e+09	94	8	GT02	Indoor air, Durian, Mealybug	Indoor air, Durian, Mealybug, Day 8	Indoor air, Durian, Mealybug, Day 8-9	After ripened	Indoor air, Durian, Mealybug, After ripened
Red	89.0903	32.7759	44.4128	201.489	36.81	51.67	GT02_20250423_093940	1.74538e+09	95	8	GT02	Indoor air, Durian, Mealybug	Indoor air, Durian, Mealybug, Day 8	Indoor air, Durian, Mealybug, Day 8-9	After ripened	Indoor air, Durian, Mealybug, After ripened
Red	87.3973	36.8139	48.4577	189.435	36.78	51.65	GT02_20250423_093940	1.74538e+09	96	8	GT02	Indoor air, Durian, Mealybug	Indoor air, Durian, Mealybug, Day 8	Indoor air, Durian, Mealybug, Day 8-9	After ripened	Indoor air, Durian, Mealybug, After ripened
Red	86.5766	39.901	51.5363	187.14	36.75	51.67	GT02_20250423_093940	1.74538e+09	97	8	GT02	Indoor air, Durian, Mealybug	Indoor air, Durian, Mealybug, Day 8	Indoor air, Durian, Mealybug, Day 8-9	After ripened	Indoor air, Durian, Mealybug, After ripened
Red	86.353	38.237	49.8452	186.719	36.75	51.74	GT02_20250423_093940	1.74538e+09	98	8	GT02	Indoor air, Durian, Mealybug	Indoor air, Durian, Mealybug, Day 8	Indoor air, Durian, Mealybug, Day 8-9	After ripened	Indoor air, Durian, Mealybug, After ripened
Red	87.9467	42.5116	54.111	187.699	36.71	51.76	GT02_20250423_093940	1.74538e+09	99	8	GT02	Indoor air, Durian, Mealybug	Indoor air, Durian, Mealybug, Day 8	Indoor air, Durian, Mealybug, Day 8-9	After ripened	Indoor air, Durian, Mealybug, After ripened
Red	87.8509	41.7985	53.3862	187.519	36.71	51.79	GT02_20250423_093940	1.74538e+09	100	8	GT02	Indoor air, Durian, Mealybug	Indoor air, Durian, Mealybug, Day 8	Indoor air, Durian, Mealybug, Day 8-9	After ripened	Indoor air, Durian, Mealybug, After ripened
Red	149.198	124.357	130.694	183.866	39.09	43.8	GT02_20250424_134603	1.74548e+09	71	9	GT02	Indoor air, Durian, Mealybug	Indoor air, Durian, Mealybug, Day 9	Indoor air, Durian, Mealybug, Day 8-9	After ripened	Indoor air, Durian, Mealybug, After ripened
Red	146.198	124.357	130.694	179.866	39.09	43.8	GT02_20250424_134603	1.74548e+09	72	9	GT02	Indoor air, Durian, Mealybug	Indoor air, Durian, Mealybug, Day 9	Indoor air, Durian, Mealybug, Day 8-9	After ripened	Indoor air, Durian, Mealybug, After ripened
Red	142.56	121.505	127.816	179.171	39.1	43.87	GT02_20250424_134603	1.74548e+09	73	9	GT02	Indoor air, Durian, Mealybug	Indoor air, Durian, Mealybug, Day 9	Indoor air, Durian, Mealybug, Day 8-9	After ripened	Indoor air, Durian, Mealybug, After ripened
Red	142.866	124.64	129.907	179.61	39.06	43.98	GT02_20250424_134603	1.74548e+09	74	9	GT02	Indoor air, Durian, Mealybug	Indoor air, Durian, Mealybug, Day 9	Indoor air, Durian, Mealybug, Day 8-9	After ripened	Indoor air, Durian, Mealybug, After ripened
Red	143.663	126.778	133.04	183.1	39.04	43.99	GT02_20250424_134603	1.74548e+09	75	9	GT02	Indoor air, Durian, Mealybug	Indoor air, Durian, Mealybug, Day 9	Indoor air, Durian, Mealybug, Day 8-9	After ripened	Indoor air, Durian, Mealybug, After ripened
Red	144.854	127.301	133.536	182.954	39.03	44.06	GT02_20250424_134603	1.74548e+09	76	9	GT02	Indoor air, Durian, Mealybug	Indoor air, Durian, Mealybug, Day 9	Indoor air, Durian, Mealybug, Day 8-9	After ripened	Indoor air, Durian, Mealybug, After ripened
Red	144.694	126.113	132.328	183.654	39.03	44.11	GT02_20250424_134603	1.74548e+09	77	9	GT02	Indoor air, Durian, Mealybug	Indoor air, Durian, Mealybug, Day 9	Indoor air, Durian, Mealybug, Day 8-9	After ripened	Indoor air, Durian, Mealybug, After ripened
Red	146.342	122.595	127.718	186.486	39.02	44.35	GT02_20250424_134603	1.74548e+09	78	9	GT02	Indoor air, Durian, Mealybug	Indoor air, Durian, Mealybug, Day 9	Indoor air, Durian, Mealybug, Day 8-9	After ripened	Indoor air, Durian, Mealybug, After ripened
Red	152.786	121.215	126.24	198.809	38.99	44.6	GT02_20250424_134603	1.74548e+09	79	9	GT02	Indoor air, Durian, Mealybug	Indoor air, Durian, Mealybug, Day 9	Indoor air, Durian, Mealybug, Day 8-9	After ripened	Indoor air, Durian, Mealybug, After ripened
Red	161.563	121.551	127.548	216.388	38.99	44.67	GT02_20250424_134603	1.74548e+09	80	9	GT02	Indoor air, Durian, Mealybug	Indoor air, Durian, Mealybug, Day 9	Indoor air, Durian, Mealybug, Day 8-9	After ripened	Indoor air, Durian, Mealybug, After ripened
Red	165.945	122.598	127.541	216.097	38.97	44.81	GT02_20250424_134603	1.74548e+09	81	9	GT02	Indoor air, Durian, Mealybug	Indoor air, Durian, Mealybug, Day 9	Indoor air, Durian, Mealybug, Day 8-9	After ripened	Indoor air, Durian, Mealybug, After ripened
Red	168.455	125.498	132.453	216.552	38.96	44.78	GT02_20250424_134603	1.74548e+09	82	9	GT02	Indoor air, Durian, Mealybug	Indoor air, Durian, Mealybug, Day 9	Indoor air, Durian, Mealybug, Day 8-9	After ripened	Indoor air, Durian, Mealybug, After ripened
Red	168.582	125.546	131.466	215.287	38.95	44.87	GT02_20250424_134603	1.74548e+09	83	9	GT02	Indoor air, Durian, Mealybug	Indoor air, Durian, Mealybug, Day 9	Indoor air, Durian, Mealybug, Day 8-9	After ripened	Indoor air, Durian, Mealybug, After ripened
Red	169.793	129.871	135.786	216.052	38.92	44.88	GT02_20250424_134603	1.74548e+09	84	9	GT02	Indoor air, Durian, Mealybug	Indoor air, Durian, Mealybug, Day 9	Indoor air, Durian, Mealybug, Day 8-9	After ripened	Indoor air, Durian, Mealybug, After ripened
Red	170.601	129.445	134.336	215.691	38.92	44.94	GT02_20250424_134603	1.74548e+09	85	9	GT02	Indoor air, Durian, Mealybug	Indoor air, Durian, Mealybug, Day 9	Indoor air, Durian, Mealybug, Day 8-9	After ripened	Indoor air, Durian, Mealybug, After ripened
Red	173.919	130.016	134.845	218.28	38.9	45.1	GT02_20250424_134603	1.74548e+09	86	9	GT02	Indoor air, Durian, Mealybug	Indoor air, Durian, Mealybug, Day 9	Indoor air, Durian, Mealybug, Day 8-9	After ripened	Indoor air, Durian, Mealybug, After ripened
Red	174.365	131.442	138.274	218.615	38.89	45.09	GT02_20250424_134603	1.74548e+09	87	9	GT02	Indoor air, Durian, Mealybug	Indoor air, Durian, Mealybug, Day 9	Indoor air, Durian, Mealybug, Day 8-9	After ripened	Indoor air, Durian, Mealybug, After ripened
Red	175.705	139.62	144.514	220.127	38.87	44.93	GT02_20250424_134603	1.74548e+09	88	9	GT02	Indoor air, Durian, Mealybug	Indoor air, Durian, Mealybug, Day 9	Indoor air, Durian, Mealybug, Day 8-9	After ripened	Indoor air, Durian, Mealybug, After ripened
Red	172.344	144.374	150.346	208.329	38.87	44.73	GT02_20250424_134603	1.74548e+09	89	9	GT02	Indoor air, Durian, Mealybug	Indoor air, Durian, Mealybug, Day 9	Indoor air, Durian, Mealybug, Day 8-9	After ripened	Indoor air, Durian, Mealybug, After ripened
Red	166.097	149.838	155.82	195.61	38.83	44.7	GT02_20250424_134603	1.74548e+09	90	9	GT02	Indoor air, Durian, Mealybug	Indoor air, Durian, Mealybug, Day 9	Indoor air, Durian, Mealybug, Day 8-9	After ripened	Indoor air, Durian, Mealybug, After ripened
Red	162.767	152.927	158.94	192.366	38.82	44.62	GT02_20250424_134603	1.74548e+09	91	9	GT02	Indoor air, Durian, Mealybug	Indoor air, Durian, Mealybug, Day 9	Indoor air, Durian, Mealybug, Day 8-9	After ripened	Indoor air, Durian, Mealybug, After ripened
Red	163.468	155.351	160.348	192.676	38.8	44.66	GT02_20250424_134603	1.74548e+09	92	9	GT02	Indoor air, Durian, Mealybug	Indoor air, Durian, Mealybug, Day 9	Indoor air, Durian, Mealybug, Day 8-9	After ripened	Indoor air, Durian, Mealybug, After ripened
Red	163.435	153.21	158.153	192.109	38.79	44.8	GT02_20250424_134603	1.74548e+09	93	9	GT02	Indoor air, Durian, Mealybug	Indoor air, Durian, Mealybug, Day 9	Indoor air, Durian, Mealybug, Day 8-9	After ripened	Indoor air, Durian, Mealybug, After ripened
Red	166.276	152.022	156.945	199.809	38.79	44.85	GT02_20250424_134603	1.74548e+09	94	9	GT02	Indoor air, Durian, Mealybug	Indoor air, Durian, Mealybug, Day 9	Indoor air, Durian, Mealybug, Day 8-9	After ripened	Indoor air, Durian, Mealybug, After ripened
Red	166.69	154.209	158.132	202.084	38.78	44.85	GT02_20250424_134603	1.74548e+09	95	9	GT02	Indoor air, Durian, Mealybug	Indoor air, Durian, Mealybug, Day 9	Indoor air, Durian, Mealybug, Day 8-9	After ripened	Indoor air, Durian, Mealybug, After ripened
Red	168.965	158.01	162.935	202.969	38.75	44.84	GT02_20250424_134603	1.74548e+09	96	9	GT02	Indoor air, Durian, Mealybug	Indoor air, Durian, Mealybug, Day 9	Indoor air, Durian, Mealybug, Day 8-9	After ripened	Indoor air, Durian, Mealybug, After ripened
Red	169.614	156.395	160.278	204.308	38.75	44.95	GT02_20250424_134603	1.74548e+09	97	9	GT02	Indoor air, Durian, Mealybug	Indoor air, Durian, Mealybug, Day 9	Indoor air, Durian, Mealybug, Day 8-9	After ripened	Indoor air, Durian, Mealybug, After ripened
Red	172.964	157.204	161.029	203.957	38.73	45.1	GT02_20250424_134603	1.74548e+09	98	9	GT02	Indoor air, Durian, Mealybug	Indoor air, Durian, Mealybug, Day 9	Indoor air, Durian, Mealybug, Day 8-9	After ripened	Indoor air, Durian, Mealybug, After ripened
Red	179.217	155.3	160.054	213.425	38.71	45.28	GT02_20250424_134603	1.74548e+09	99	9	GT02	Indoor air, Durian, Mealybug	Indoor air, Durian, Mealybug, Day 9	Indoor air, Durian, Mealybug, Day 8-9	After ripened	Indoor air, Durian, Mealybug, After ripened
Red	180.122	155.587	160.33	218.245	38.71	45.31	GT02_20250424_134603	1.74548e+09	100	9	GT02	Indoor air, Durian, Mealybug	Indoor air, Durian, Mealybug, Day 9	Indoor air, Durian, Mealybug, Day 8-9	After ripened	Indoor air, Durian, Mealybug, After ripened
Blue	-22.9837	-62.5781	-64.001	-34.8608	37.57	48.36	GT03_20250418_151007	1744963808	71	3	GT03	Indoor air, Durian	Indoor air, Durian, Day 3	Indoor air, Durian, Day 3	Before ripened	Indoor air, Durian, Before ripened
Blue	-22.792	-61.1518	-63.5515	-34.5001	37.57	48.3	GT03_20250418_151007	1744963808	72	3	GT03	Indoor air, Durian	Indoor air, Durian, Day 3	Indoor air, Durian, Day 3	Before ripened	Indoor air, Durian, Before ripened
Blue	-21.9313	-58.539	-60.9354	-33.8898	37.55	48.29	GT03_20250418_151007	1744963808	73	3	GT03	Indoor air, Durian	Indoor air, Durian, Day 3	Indoor air, Durian, Day 3	Before ripened	Indoor air, Durian, Before ripened
Blue	-22.2507	-61.9162	-63.3513	-34.4909	37.55	48.39	GT03_20250418_151007	1744963808	74	3	GT03	Indoor air, Durian	Indoor air, Durian, Day 3	Indoor air, Durian, Day 3	Before ripened	Indoor air, Durian, Before ripened
Blue	-21.5817	-60.7297	-62.1848	-34.2412	37.53	48.44	GT03_20250418_151007	1744963808	75	3	GT03	Indoor air, Durian	Indoor air, Durian, Day 3	Indoor air, Durian, Day 3	Before ripened	Indoor air, Durian, Before ripened
Blue	-22.1362	-61.2073	-62.7093	-34.4122	37.51	48.56	GT03_20250418_151007	1744963808	76	3	GT03	Indoor air, Durian	Indoor air, Durian, Day 3	Indoor air, Durian, Day 3	Before ripened	Indoor air, Durian, Before ripened
Blue	-21.4679	-62.9236	-63.4962	-34.6688	37.48	48.74	GT03_20250418_151007	1744963808	77	3	GT03	Indoor air, Durian	Indoor air, Durian, Day 3	Indoor air, Durian, Day 3	Before ripened	Indoor air, Durian, Before ripened
Blue	-22.0109	-66.9648	-68.6032	-35.6907	37.48	48.91	GT03_20250418_151007	1744963808	78	3	GT03	Indoor air, Durian	Indoor air, Durian, Day 3	Indoor air, Durian, Day 3	Before ripened	Indoor air, Durian, Before ripened
Blue	-20.9603	-66.7313	-68.4444	-34.7322	37.44	49.1	GT03_20250418_151007	1744963808	79	3	GT03	Indoor air, Durian	Indoor air, Durian, Day 3	Indoor air, Durian, Day 3	Before ripened	Indoor air, Durian, Before ripened
Blue	-21.4074	-70.0593	-71.8267	-35.5738	37.44	49.24	GT03_20250418_151007	1744963808	80	3	GT03	Indoor air, Durian	Indoor air, Durian, Day 3	Indoor air, Durian, Day 3	Before ripened	Indoor air, Durian, Before ripened
Blue	-20.1651	-68.3995	-70.2183	-35.2547	37.4	49.37	GT03_20250418_151007	1744963808	81	3	GT03	Indoor air, Durian	Indoor air, Durian, Day 3	Indoor air, Durian, Day 3	Before ripened	Indoor air, Durian, Before ripened
Blue	-20.4091	-74.8649	-75.7335	-36.5864	37.42	49.5	GT03_20250418_151007	1744963808	82	3	GT03	Indoor air, Durian	Indoor air, Durian, Day 3	Indoor air, Durian, Day 3	Before ripened	Indoor air, Durian, Before ripened
Blue	-21.0595	-76.0556	-77.9829	-36.9378	37.4	49.65	GT03_20250418_151007	1744963808	83	3	GT03	Indoor air, Durian	Indoor air, Durian, Day 3	Indoor air, Durian, Day 3	Before ripened	Indoor air, Durian, Before ripened
Blue	-20.614	-76.5331	-78.5074	-36.1088	37.38	49.77	GT03_20250418_151007	1744963808	84	3	GT03	Indoor air, Durian	Indoor air, Durian, Day 3	Indoor air, Durian, Day 3	Before ripened	Indoor air, Durian, Before ripened
Blue	-19.5608	-70.5913	-72.4884	-34.6315	37.37	49.57	GT03_20250418_151007	1744963808	85	3	GT03	Indoor air, Durian	Indoor air, Durian, Day 3	Indoor air, Durian, Day 3	Before ripened	Indoor air, Durian, Before ripened
Blue	-17.3274	-60.6596	-62.4373	-31.9427	37.34	49.26	GT03_20250418_151007	1744963808	86	3	GT03	Indoor air, Durian	Indoor air, Durian, Day 3	Indoor air, Durian, Day 3	Before ripened	Indoor air, Durian, Before ripened
Blue	-15.2538	-50.9165	-52.5942	-30.5544	37.31	49	GT03_20250418_151007	1744963808	87	3	GT03	Indoor air, Durian	Indoor air, Durian, Day 3	Indoor air, Durian, Day 3	Before ripened	Indoor air, Durian, Before ripened
Blue	-15.5715	-50.4881	-52.1033	-31.1429	37.33	48.84	GT03_20250418_151007	1744963808	88	3	GT03	Indoor air, Durian	Indoor air, Durian, Day 3	Indoor air, Durian, Day 3	Before ripened	Indoor air, Durian, Before ripened
Blue	-15.583	-46.9245	-48.5208	-30.2921	37.31	48.79	GT03_20250418_151007	1744963808	89	3	GT03	Indoor air, Durian	Indoor air, Durian, Day 3	Indoor air, Durian, Day 3	Before ripened	Indoor air, Durian, Before ripened
Blue	-14.0213	-42.8876	-45.4966	-29.3719	37.27	48.82	GT03_20250418_151007	1744963808	90	3	GT03	Indoor air, Durian	Indoor air, Durian, Day 3	Indoor air, Durian, Day 3	Before ripened	Indoor air, Durian, Before ripened
Blue	-15.0098	-47.4512	-49.0791	-30.2227	37.29	48.87	GT03_20250418_151007	1744963808	91	3	GT03	Indoor air, Durian	Indoor air, Durian, Day 3	Indoor air, Durian, Day 3	Before ripened	Indoor air, Durian, Before ripened
Blue	-13.2572	-43.8907	-45.5587	-29.4481	37.24	48.97	GT03_20250418_151007	1744963808	92	3	GT03	Indoor air, Durian	Indoor air, Durian, Day 3	Indoor air, Durian, Day 3	Before ripened	Indoor air, Durian, Before ripened
Blue	-13.1623	-45.0804	-46.7874	-29.7741	37.23	49.07	GT03_20250418_151007	1744963808	93	3	GT03	Indoor air, Durian	Indoor air, Durian, Day 3	Indoor air, Durian, Day 3	Before ripened	Indoor air, Durian, Before ripened
Blue	-13.4825	-49.3603	-51.1567	-30.8815	37.22	49.3	GT03_20250418_151007	1744963808	94	3	GT03	Indoor air, Durian	Indoor air, Durian, Day 3	Indoor air, Durian, Day 3	Before ripened	Indoor air, Durian, Before ripened
Blue	-13.9616	-53.926	-54.7805	-31.7832	37.22	49.45	GT03_20250418_151007	1744963808	95	3	GT03	Indoor air, Durian	Indoor air, Durian, Day 3	Indoor air, Durian, Day 3	Before ripened	Indoor air, Durian, Before ripened
Blue	-13.2615	-54.4046	-56.3258	-30.9796	37.19	49.62	GT03_20250418_151007	1744963808	96	3	GT03	Indoor air, Durian	Indoor air, Durian, Day 3	Indoor air, Durian, Day 3	Before ripened	Indoor air, Durian, Before ripened
Blue	-13.0396	-56.5462	-58.5415	-31.5715	37.17	49.81	GT03_20250418_151007	1744963808	97	3	GT03	Indoor air, Durian	Indoor air, Durian, Day 3	Indoor air, Durian, Day 3	Before ripened	Indoor air, Durian, Before ripened
Blue	-11.957	-56.075	-58.1411	-31.5529	37.13	49.99	GT03_20250418_151007	1744963808	98	3	GT03	Indoor air, Durian	Indoor air, Durian, Day 3	Indoor air, Durian, Day 3	Before ripened	Indoor air, Durian, Before ripened
Blue	-12.3083	-58.6899	-60.7986	-32.2141	37.13	50.1	GT03_20250418_151007	1744963808	99	3	GT03	Indoor air, Durian	Indoor air, Durian, Day 3	Indoor air, Durian, Day 3	Before ripened	Indoor air, Durian, Before ripened
Blue	-12.8194	-62.4933	-64.664	-33.1759	37.13	50.26	GT03_20250418_151007	1744963808	100	3	GT03	Indoor air, Durian	Indoor air, Durian, Day 3	Indoor air, Durian, Day 3	Before ripened	Indoor air, Durian, Before ripened
Red	-26.6139	-81.5783	-82.9971	-14.2629	37.03	51.53	GT03_20250419_102146	1745032907	71	4	GT03	Indoor air, Durian, Mealybug	Indoor air, Durian, Mealybug, Day 4	Indoor air, Durian, Mealybug, Day 4-5	Before ripened	Indoor air, Durian, Mealybug, Before ripened
Red	-26.3912	-81.817	-84.2594	-14.3485	37.02	51.59	GT03_20250419_102146	1745032907	72	4	GT03	Indoor air, Durian, Mealybug	Indoor air, Durian, Mealybug, Day 4	Indoor air, Durian, Mealybug, Day 4-5	Before ripened	Indoor air, Durian, Mealybug, Before ripened
Red	-26.9137	-82.0569	-84.5424	-14.4594	37	51.7	GT03_20250419_102146	1745032907	73	4	GT03	Indoor air, Durian, Mealybug	Indoor air, Durian, Mealybug, Day 4	Indoor air, Durian, Mealybug, Day 4-5	Before ripened	Indoor air, Durian, Mealybug, Before ripened
Red	-26.3405	-82.5836	-85.1006	-14.39	36.98	51.78	GT03_20250419_102146	1745032907	74	4	GT03	Indoor air, Durian, Mealybug	Indoor air, Durian, Mealybug, Day 4	Indoor air, Durian, Mealybug, Day 4-5	Before ripened	Indoor air, Durian, Mealybug, Before ripened
Red	-25.895	-83.0611	-85.6251	-14.5611	36.96	51.9	GT03_20250419_102146	1745032907	75	4	GT03	Indoor air, Durian, Mealybug	Indoor air, Durian, Mealybug, Day 4	Indoor air, Durian, Mealybug, Day 4-5	Before ripened	Indoor air, Durian, Mealybug, Before ripened
Red	-25.099	-82.8266	-85.4456	-13.5772	36.93	52.04	GT03_20250419_102146	1745032907	76	4	GT03	Indoor air, Durian, Mealybug	Indoor air, Durian, Mealybug, Day 4	Indoor air, Durian, Mealybug, Day 4-5	Before ripened	Indoor air, Durian, Mealybug, Before ripened
Red	-25.0999	-84.7294	-87.3991	-14.0835	36.92	52.17	GT03_20250419_102146	1745032907	77	4	GT03	Indoor air, Durian, Mealybug	Indoor air, Durian, Mealybug, Day 4	Indoor air, Durian, Mealybug, Day 4-5	Before ripened	Indoor air, Durian, Mealybug, Before ripened
Red	-25.4512	-88.3442	-90.0566	-14.7447	36.92	52.28	GT03_20250419_102146	1745032907	78	4	GT03	Indoor air, Durian, Mealybug	Indoor air, Durian, Mealybug, Day 4	Indoor air, Durian, Mealybug, Day 4-5	Before ripened	Indoor air, Durian, Mealybug, Before ripened
Red	-25.6748	-90.0082	-91.7477	-15.1655	36.92	52.35	GT03_20250419_102146	1745032907	79	4	GT03	Indoor air, Durian, Mealybug	Indoor air, Durian, Mealybug, Day 4	Indoor air, Durian, Mealybug, Day 4-5	Before ripened	Indoor air, Durian, Mealybug, Before ripened
Red	-25.1016	-89.5349	-91.3059	-14.0961	36.9	52.43	GT03_20250419_102146	1745032907	80	4	GT03	Indoor air, Durian, Mealybug	Indoor air, Durian, Mealybug, Day 4	Indoor air, Durian, Mealybug, Day 4-5	Before ripened	Indoor air, Durian, Mealybug, Before ripened
Red	-25.3579	-93.3394	-95.192	-15.0833	36.89	52.64	GT03_20250419_102146	1745032907	81	4	GT03	Indoor air, Durian, Mealybug	Indoor air, Durian, Mealybug, Day 4	Indoor air, Durian, Mealybug, Day 4-5	Before ripened	Indoor air, Durian, Mealybug, Before ripened
Red	-24.8477	-91.4388	-94.28	-14.6278	36.88	52.61	GT03_20250419_102146	1745032907	82	4	GT03	Indoor air, Durian, Mealybug	Indoor air, Durian, Mealybug, Day 4	Indoor air, Durian, Mealybug, Day 4-5	Before ripened	Indoor air, Durian, Mealybug, Before ripened
Red	-23.0296	-84.5974	-86.3696	-12.7205	36.85	52.43	GT03_20250419_102146	1745032907	83	4	GT03	Indoor air, Durian, Mealybug	Indoor air, Durian, Mealybug, Day 4	Indoor air, Durian, Mealybug, Day 4-5	Before ripened	Indoor air, Durian, Mealybug, Before ripened
Red	-22.5505	-81.0317	-82.7458	-11.8188	36.85	52.28	GT03_20250419_102146	1745032907	84	4	GT03	Indoor air, Durian, Mealybug	Indoor air, Durian, Mealybug, Day 4	Indoor air, Durian, Mealybug, Day 4-5	Before ripened	Indoor air, Durian, Mealybug, Before ripened
Red	-20.6374	-75.3799	-76.0641	-11.2374	36.81	52.2	GT03_20250419_102146	1745032907	85	4	GT03	Indoor air, Durian, Mealybug	Indoor air, Durian, Mealybug, Day 4	Indoor air, Durian, Mealybug, Day 4-5	Before ripened	Indoor air, Durian, Mealybug, Before ripened
Red	-20.7652	-76.3307	-78.0304	-11.4778	36.81	52.24	GT03_20250419_102146	1745032907	86	4	GT03	Indoor air, Durian, Mealybug	Indoor air, Durian, Mealybug, Day 4	Indoor air, Durian, Mealybug, Day 4-5	Before ripened	Indoor air, Durian, Mealybug, Before ripened
Red	-21.0961	-75.1443	-77.8639	-12.2281	36.79	52.29	GT03_20250419_102146	1745032907	87	4	GT03	Indoor air, Durian, Mealybug	Indoor air, Durian, Mealybug, Day 4	Indoor air, Durian, Mealybug, Day 4-5	Before ripened	Indoor air, Durian, Mealybug, Before ripened
Red	-20.7137	-74.1945	-76.9182	-12.0131	36.78	52.3	GT03_20250419_102146	1745032907	88	4	GT03	Indoor air, Durian, Mealybug	Indoor air, Durian, Mealybug, Day 4	Indoor air, Durian, Mealybug, Day 4-5	Before ripened	Indoor air, Durian, Mealybug, Before ripened
Red	-20.1723	-74.9589	-76.718	-12.0038	36.76	52.39	GT03_20250419_102146	1745032907	89	4	GT03	Indoor air, Durian, Mealybug	Indoor air, Durian, Mealybug, Day 4	Indoor air, Durian, Mealybug, Day 4-5	Before ripened	Indoor air, Durian, Mealybug, Before ripened
Red	-20.2043	-75.1966	-76.9596	-12.0639	36.76	52.4	GT03_20250419_102146	1745032907	90	4	GT03	Indoor air, Durian, Mealybug	Indoor air, Durian, Mealybug, Day 4	Indoor air, Durian, Mealybug, Day 4-5	Before ripened	Indoor air, Durian, Mealybug, Before ripened
Red	-19.8546	-76.3873	-79.2089	-12.4153	36.74	52.55	GT03_20250419_102146	1745032907	91	4	GT03	Indoor air, Durian, Mealybug	Indoor air, Durian, Mealybug, Day 4	Indoor air, Durian, Mealybug, Day 4-5	Before ripened	Indoor air, Durian, Mealybug, Before ripened
Red	-20.6842	-81.6651	-83.5369	-13.4719	36.75	52.68	GT03_20250419_102146	1745032907	92	4	GT03	Indoor air, Durian, Mealybug	Indoor air, Durian, Mealybug, Day 4	Indoor air, Durian, Mealybug, Day 4-5	Before ripened	Indoor air, Durian, Mealybug, Before ripened
Red	-19.8998	-77.867	-79.7749	-12.6372	36.7	52.77	GT03_20250419_102146	1745032907	93	4	GT03	Indoor air, Durian, Mealybug	Indoor air, Durian, Mealybug, Day 4	Indoor air, Durian, Mealybug, Day 4-5	Before ripened	Indoor air, Durian, Mealybug, Before ripened
Red	-20.2192	-80.2441	-82.1908	-12.2383	36.7	52.87	GT03_20250419_102146	1745032907	94	4	GT03	Indoor air, Durian, Mealybug	Indoor air, Durian, Mealybug, Day 4	Indoor air, Durian, Mealybug, Day 4-5	Before ripened	Indoor air, Durian, Mealybug, Before ripened
Red	-19.7302	-84.0476	-87.0563	-13.2001	36.7	53.03	GT03_20250419_102146	1745032907	95	4	GT03	Indoor air, Durian, Mealybug	Indoor air, Durian, Mealybug, Day 4	Indoor air, Durian, Mealybug, Day 4-5	Before ripened	Indoor air, Durian, Mealybug, Before ripened
Red	-19.6148	-81.4359	-84.4609	-11.6151	36.67	53.07	GT03_20250419_102146	1745032907	96	4	GT03	Indoor air, Durian, Mealybug	Indoor air, Durian, Mealybug, Day 4	Indoor air, Durian, Mealybug, Day 4-5	Before ripened	Indoor air, Durian, Mealybug, Before ripened
Red	-18.8827	-82.6768	-84.7645	-11.7515	36.64	53.23	GT03_20250419_102146	1745032907	97	4	GT03	Indoor air, Durian, Mealybug	Indoor air, Durian, Mealybug, Day 4	Indoor air, Durian, Mealybug, Day 4-5	Before ripened	Indoor air, Durian, Mealybug, Before ripened
Red	-19.0424	-83.8654	-85.9725	-12.052	36.64	53.28	GT03_20250419_102146	1745032907	98	4	GT03	Indoor air, Durian, Mealybug	Indoor air, Durian, Mealybug, Day 4	Indoor air, Durian, Mealybug, Day 4-5	Before ripened	Indoor air, Durian, Mealybug, Before ripened
Red	-17.0655	-77.7382	-79.8076	-10.3504	36.6	53.18	GT03_20250419_102146	1745032907	99	4	GT03	Indoor air, Durian, Mealybug	Indoor air, Durian, Mealybug, Day 4	Indoor air, Durian, Mealybug, Day 4-5	Before ripened	Indoor air, Durian, Mealybug, Before ripened
Red	-16.7133	-73.2205	-75.1967	-9.18288	36.61	52.94	GT03_20250419_102146	1745032907	100	4	GT03	Indoor air, Durian, Mealybug	Indoor air, Durian, Mealybug, Day 4	Indoor air, Durian, Mealybug, Day 4-5	Before ripened	Indoor air, Durian, Mealybug, Before ripened
Red	-20.0176	-77.2322	-78.7202	30.1048	36.81	53.63	GT03_20250420_101824	1745119105	71	5	GT03	Indoor air, Durian, Mealybug	Indoor air, Durian, Mealybug, Day 5	Indoor air, Durian, Mealybug, Day 4-5	Before ripened	Indoor air, Durian, Mealybug, Before ripened
Red	-20.4001	-78.182	-79.6659	27.8898	36.82	53.62	GT03_20250420_101824	1745119105	72	5	GT03	Indoor air, Durian, Mealybug	Indoor air, Durian, Mealybug, Day 5	Indoor air, Durian, Mealybug, Day 4-5	Before ripened	Indoor air, Durian, Mealybug, Before ripened
Red	-21.1135	-77.9453	-79.445	25.9245	36.81	53.66	GT03_20250420_101824	1745119105	73	5	GT03	Indoor air, Durian, Mealybug	Indoor air, Durian, Mealybug, Day 5	Indoor air, Durian, Mealybug, Day 4-5	Before ripened	Indoor air, Durian, Mealybug, Before ripened
Red	-19.6165	-76.2866	-77.8573	26.2182	36.76	53.84	GT03_20250420_101824	1745119105	74	5	GT03	Indoor air, Durian, Mealybug	Indoor air, Durian, Mealybug, Day 5	Indoor air, Durian, Mealybug, Day 4-5	Before ripened	Indoor air, Durian, Mealybug, Before ripened
Red	-20.7966	-81.2765	-83.8893	25.0067	36.78	53.95	GT03_20250420_101824	1745119105	75	5	GT03	Indoor air, Durian, Mealybug	Indoor air, Durian, Mealybug, Day 5	Indoor air, Durian, Mealybug, Day 4-5	Before ripened	Indoor air, Durian, Mealybug, Before ripened
Red	-19.777	-80.378	-81.0187	27.4113	36.75	54.02	GT03_20250420_101824	1745119105	76	5	GT03	Indoor air, Durian, Mealybug	Indoor air, Durian, Mealybug, Day 5	Indoor air, Durian, Mealybug, Day 4-5	Before ripened	Indoor air, Durian, Mealybug, Before ripened
Red	-18.7459	-82.043	-83.7305	27.9651	36.74	54.14	GT03_20250420_101824	1745119105	77	5	GT03	Indoor air, Durian, Mealybug	Indoor air, Durian, Mealybug, Day 5	Indoor air, Durian, Mealybug, Day 4-5	Before ripened	Indoor air, Durian, Mealybug, Before ripened
Red	-18.8417	-82.7562	-84.4553	27.7848	36.74	54.17	GT03_20250420_101824	1745119105	78	5	GT03	Indoor air, Durian, Mealybug	Indoor air, Durian, Mealybug, Day 5	Indoor air, Durian, Mealybug, Day 4-5	Before ripened	Indoor air, Durian, Mealybug, Before ripened
Red	-18.3643	-82.996	-84.7383	28.6738	36.72	54.28	GT03_20250420_101824	1745119105	79	5	GT03	Indoor air, Durian, Mealybug	Indoor air, Durian, Mealybug, Day 5	Indoor air, Durian, Mealybug, Day 4-5	Before ripened	Indoor air, Durian, Mealybug, Before ripened
Red	-18.1096	-82.9971	-84.759	30.6484	36.71	54.33	GT03_20250420_101824	1745119105	80	5	GT03	Indoor air, Durian, Mealybug	Indoor air, Durian, Mealybug, Day 5	Indoor air, Durian, Mealybug, Day 4-5	Before ripened	Indoor air, Durian, Mealybug, Before ripened
Red	-17.2178	-82.0494	-83.8547	31.8126	36.68	54.44	GT03_20250420_101824	1745119105	81	5	GT03	Indoor air, Durian, Mealybug	Indoor air, Durian, Mealybug, Day 5	Indoor air, Durian, Mealybug, Day 4-5	Before ripened	Indoor air, Durian, Mealybug, Before ripened
Red	-17.027	-82.5259	-84.3586	31.667	36.67	54.51	GT03_20250420_101824	1745119105	82	5	GT03	Indoor air, Durian, Mealybug	Indoor air, Durian, Mealybug, Day 5	Indoor air, Durian, Mealybug, Day 4-5	Before ripened	Indoor air, Durian, Mealybug, Before ripened
Red	-16.4857	-82.2903	-84.1584	33.6763	36.65	54.6	GT03_20250420_101824	1745119105	83	5	GT03	Indoor air, Durian, Mealybug	Indoor air, Durian, Mealybug, Day 5	Indoor air, Durian, Mealybug, Day 4-5	Before ripened	Indoor air, Durian, Mealybug, Before ripened
Red	-15.625	-80.6776	-81.5423	35.2866	36.63	54.59	GT03_20250420_101824	1745119105	84	5	GT03	Indoor air, Durian, Mealybug	Indoor air, Durian, Mealybug, Day 5	Indoor air, Durian, Mealybug, Day 4-5	Before ripened	Indoor air, Durian, Mealybug, Before ripened
Red	-15.7838	-79.9634	-81.7968	35.4924	36.64	54.51	GT03_20250420_101824	1745119105	85	5	GT03	Indoor air, Durian, Mealybug	Indoor air, Durian, Mealybug, Day 5	Indoor air, Durian, Mealybug, Day 4-5	Before ripened	Indoor air, Durian, Mealybug, Before ripened
Red	-14.1893	-73.786	-75.5776	36.979	36.61	54.4	GT03_20250420_101824	1745119105	86	5	GT03	Indoor air, Durian, Mealybug	Indoor air, Durian, Mealybug, Day 5	Indoor air, Durian, Mealybug, Day 4-5	Before ripened	Indoor air, Durian, Mealybug, Before ripened
Red	-14.3278	-69.2704	-71.0081	35.0957	36.6	54.26	GT03_20250420_101824	1745119105	87	5	GT03	Indoor air, Durian, Mealybug	Indoor air, Durian, Mealybug, Day 5	Indoor air, Durian, Mealybug, Day 4-5	Before ripened	Indoor air, Durian, Mealybug, Before ripened
Red	-13.1165	-65.9456	-67.6879	32.861	36.57	54.27	GT03_20250420_101824	1745119105	88	5	GT03	Indoor air, Durian, Mealybug	Indoor air, Durian, Mealybug, Day 5	Indoor air, Durian, Mealybug, Day 4-5	Before ripened	Indoor air, Durian, Mealybug, Before ripened
Red	-15.5194	-71.6967	-73.4576	28.735	36.6	54.32	GT03_20250420_101824	1745119105	89	5	GT03	Indoor air, Durian, Mealybug	Indoor air, Durian, Mealybug, Day 5	Indoor air, Durian, Mealybug, Day 4-5	Before ripened	Indoor air, Durian, Mealybug, Before ripened
Red	-13.3205	-66.7111	-68.5084	29.8448	36.54	54.41	GT03_20250420_101824	1745119105	90	5	GT03	Indoor air, Durian, Mealybug	Indoor air, Durian, Mealybug, Day 5	Indoor air, Durian, Mealybug, Day 4-5	Before ripened	Indoor air, Durian, Mealybug, Before ripened
Red	-13.7038	-69.5637	-71.4075	29.1235	36.54	54.53	GT03_20250420_101824	1745119105	91	5	GT03	Indoor air, Durian, Mealybug	Indoor air, Durian, Mealybug, Day 5	Indoor air, Durian, Mealybug, Day 4-5	Before ripened	Indoor air, Durian, Mealybug, Before ripened
Red	-14.0232	-71.9408	-73.8234	29.5224	36.54	54.63	GT03_20250420_101824	1745119105	92	5	GT03	Indoor air, Durian, Mealybug	Indoor air, Durian, Mealybug, Day 5	Indoor air, Durian, Mealybug, Day 4-5	Before ripened	Indoor air, Durian, Mealybug, Before ripened
Red	-12.4943	-70.0444	-71.9942	30.8762	36.49	54.8	GT03_20250420_101824	1745119105	93	5	GT03	Indoor air, Durian, Mealybug	Indoor air, Durian, Mealybug, Day 5	Indoor air, Durian, Mealybug, Day 4-5	Before ripened	Indoor air, Durian, Mealybug, Before ripened
Red	-12.7498	-72.9461	-73.9269	33.3953	36.49	54.88	GT03_20250420_101824	1745119105	94	5	GT03	Indoor air, Durian, Mealybug	Indoor air, Durian, Mealybug, Day 5	Indoor air, Durian, Mealybug, Day 4-5	Before ripened	Indoor air, Durian, Mealybug, Before ripened
Red	-10.5394	-71.5241	-72.5601	35.6543	36.45	55.02	GT03_20250420_101824	1745119105	95	5	GT03	Indoor air, Durian, Mealybug	Indoor air, Durian, Mealybug, Day 5	Indoor air, Durian, Mealybug, Day 4-5	Before ripened	Indoor air, Durian, Mealybug, Before ripened
Red	-11.3486	-72.0006	-73.064	37.5087	36.44	55.09	GT03_20250420_101824	1745119105	96	5	GT03	Indoor air, Durian, Mealybug	Indoor air, Durian, Mealybug, Day 5	Indoor air, Durian, Mealybug, Day 4-5	Before ripened	Indoor air, Durian, Mealybug, Before ripened
Red	-12.1783	-76.2784	-77.3919	37.4521	36.45	55.22	GT03_20250420_101824	1745119105	97	5	GT03	Indoor air, Durian, Mealybug	Indoor air, Durian, Mealybug, Day 5	Indoor air, Durian, Mealybug, Day 4-5	Before ripened	Indoor air, Durian, Mealybug, Before ripened
Red	-10.4453	-74.6165	-75.7422	38.822	36.43	55.25	GT03_20250420_101824	1745119105	98	5	GT03	Indoor air, Durian, Mealybug	Indoor air, Durian, Mealybug, Day 5	Indoor air, Durian, Mealybug, Day 4-5	Before ripened	Indoor air, Durian, Mealybug, Before ripened
Red	-10.8286	-77.4691	-78.6413	40.1007	36.43	55.37	GT03_20250420_101824	1745119105	99	5	GT03	Indoor air, Durian, Mealybug	Indoor air, Durian, Mealybug, Day 5	Indoor air, Durian, Mealybug, Day 4-5	Before ripened	Indoor air, Durian, Mealybug, Before ripened
Red	-10.1595	-76.2826	-78.4747	42.3504	36.41	55.42	GT03_20250420_101824	1745119105	100	5	GT03	Indoor air, Durian, Mealybug	Indoor air, Durian, Mealybug, Day 5	Indoor air, Durian, Mealybug, Day 4-5	Before ripened	Indoor air, Durian, Mealybug, Before ripened
Red	-5.81981	-25.2387	-23.1768	107.103	37.51	49.96	GT03_20250421_091541	1.7452e+09	71	6	GT03	Indoor air, Durian, Mealybug	Indoor air, Durian, Mealybug, Day 6	Indoor air, Durian, Mealybug, Day 6-7	Ripened	Indoor air, Durian, Mealybug, Ripened
Red	-4.83217	-24.5779	-20.5478	110.447	37.48	50.04	GT03_20250421_091541	1.7452e+09	72	6	GT03	Indoor air, Durian, Mealybug	Indoor air, Durian, Mealybug, Day 6	Indoor air, Durian, Mealybug, Day 6-7	Ripened	Indoor air, Durian, Mealybug, Ripened
Red	-5.1188	-24.8145	-21.7686	110.413	37.49	50	GT03_20250421_091541	1.7452e+09	73	6	GT03	Indoor air, Durian, Mealybug	Indoor air, Durian, Mealybug, Day 6	Indoor air, Durian, Mealybug, Day 6-7	Ripened	Indoor air, Durian, Mealybug, Ripened
Red	-2.43997	-14.3604	-11.2422	112.93	37.44	49.81	GT03_20250421_091541	1.7452e+09	74	6	GT03	Indoor air, Durian, Mealybug	Indoor air, Durian, Mealybug, Day 6	Indoor air, Durian, Mealybug, Day 6-7	Ripened	Indoor air, Durian, Mealybug, Ripened
Red	-2.64144	-8.41751	-5.20242	109.433	37.44	49.56	GT03_20250421_091541	1.7452e+09	75	6	GT03	Indoor air, Durian, Mealybug	Indoor air, Durian, Mealybug, Day 6	Indoor air, Durian, Mealybug, Day 6-7	Ripened	Indoor air, Durian, Mealybug, Ripened
Red	-4.8003	-8.7033	-4.45695	90.6388	37.45	49.48	GT03_20250421_091541	1.7452e+09	76	6	GT03	Indoor air, Durian, Mealybug	Indoor air, Durian, Mealybug, Day 6	Indoor air, Durian, Mealybug, Day 6-7	Ripened	Indoor air, Durian, Mealybug, Ripened
Red	-4.52519	-4.90305	-1.6536	82.5243	37.42	49.47	GT03_20250421_091541	1.7452e+09	77	6	GT03	Indoor air, Durian, Mealybug	Indoor air, Durian, Mealybug, Day 6	Indoor air, Durian, Mealybug, Day 6-7	Ripened	Indoor air, Durian, Mealybug, Ripened
Red	-3.79223	-3.24117	-0.00386863	78.8942	37.4	49.5	GT03_20250421_091541	1.7452e+09	78	6	GT03	Indoor air, Durian, Mealybug	Indoor air, Durian, Mealybug, Day 6	Indoor air, Durian, Mealybug, Day 6-7	Ripened	Indoor air, Durian, Mealybug, Ripened
Red	-2.96345	-0.866141	1.37064	78.4445	37.38	49.5	GT03_20250421_091541	1.7452e+09	79	6	GT03	Indoor air, Durian, Mealybug	Indoor air, Durian, Mealybug, Day 6	Indoor air, Durian, Mealybug, Day 6-7	Ripened	Indoor air, Durian, Mealybug, Ripened
Red	-3.07164	-0.918468	2.2749	78.6087	37.35	49.61	GT03_20250421_091541	1.7452e+09	80	6	GT03	Indoor air, Durian, Mealybug	Indoor air, Durian, Mealybug, Day 6	Indoor air, Durian, Mealybug, Day 6-7	Ripened	Indoor air, Durian, Mealybug, Ripened
Red	-3.42299	-4.53333	-0.382588	78.9475	37.35	49.72	GT03_20250421_091541	1.7452e+09	81	6	GT03	Indoor air, Durian, Mealybug	Indoor air, Durian, Mealybug, Day 6	Indoor air, Durian, Mealybug, Day 6-7	Ripened	Indoor air, Durian, Mealybug, Ripened
Red	-3.10527	-5.96175	-1.87352	81.536	37.33	49.88	GT03_20250421_091541	1.7452e+09	82	6	GT03	Indoor air, Durian, Mealybug	Indoor air, Durian, Mealybug, Day 6	Indoor air, Durian, Mealybug, Day 6-7	Ripened	Indoor air, Durian, Mealybug, Ripened
Red	-3.7441	-9.71605	-6.70532	90.3338	37.33	50.08	GT03_20250421_091541	1.7452e+09	83	6	GT03	Indoor air, Durian, Mealybug	Indoor air, Durian, Mealybug, Day 6	Indoor air, Durian, Mealybug, Day 6-7	Ripened	Indoor air, Durian, Mealybug, Ripened
Red	-1.42638	-11.1445	-8.19626	95.9223	37.31	50.24	GT03_20250421_091541	1.7452e+09	84	6	GT03	Indoor air, Durian, Mealybug	Indoor air, Durian, Mealybug, Day 6	Indoor air, Durian, Mealybug, Day 6-7	Ripened	Indoor air, Durian, Mealybug, Ripened
Red	-1.01283	-11.8597	-8.96243	104.691	37.29	50.37	GT03_20250421_091541	1.7452e+09	85	6	GT03	Indoor air, Durian, Mealybug	Indoor air, Durian, Mealybug, Day 6	Indoor air, Durian, Mealybug, Day 6-7	Ripened	Indoor air, Durian, Mealybug, Ripened
Red	0.667756	-14.2369	-11.3783	112.09	37.29	50.47	GT03_20250421_091541	1.7452e+09	86	6	GT03	Indoor air, Durian, Mealybug	Indoor air, Durian, Mealybug, Day 6	Indoor air, Durian, Mealybug, Day 6-7	Ripened	Indoor air, Durian, Mealybug, Ripened
Red	1.0813	-14.9521	-12.1445	116.859	37.27	50.6	GT03_20250421_091541	1.7452e+09	87	6	GT03	Indoor air, Durian, Mealybug	Indoor air, Durian, Mealybug, Day 6	Indoor air, Durian, Mealybug, Day 6-7	Ripened	Indoor air, Durian, Mealybug, Ripened
Red	3.33598	-14.9532	-12.1652	120.833	37.26	50.65	GT03_20250421_091541	1.7452e+09	88	6	GT03	Indoor air, Durian, Mealybug	Indoor air, Durian, Mealybug, Day 6	Indoor air, Durian, Mealybug, Day 6-7	Ripened	Indoor air, Durian, Mealybug, Ripened
Red	3.71758	-15.9062	-12.1729	123.542	37.24	50.79	GT03_20250421_091541	1.7452e+09	89	6	GT03	Indoor air, Durian, Mealybug	Indoor air, Durian, Mealybug, Day 6	Indoor air, Durian, Mealybug, Day 6-7	Ripened	Indoor air, Durian, Mealybug, Ripened
Red	4.19586	-14.2433	-10.5025	123.937	37.23	50.77	GT03_20250421_091541	1.7452e+09	90	6	GT03	Indoor air, Durian, Mealybug	Indoor air, Durian, Mealybug, Day 6	Indoor air, Durian, Mealybug, Day 6-7	Ripened	Indoor air, Durian, Mealybug, Ripened
Red	6.49309	-2.83612	0.0317148	126.747	37.2	50.44	GT03_20250421_091541	1.7452e+09	91	6	GT03	Indoor air, Durian, Mealybug	Indoor air, Durian, Mealybug, Day 6	Indoor air, Durian, Mealybug, Day 6-7	Ripened	Indoor air, Durian, Mealybug, Ripened
Red	7.03609	0.205036	4.13875	119.768	37.2	50.27	GT03_20250421_091541	1.7452e+09	92	6	GT03	Indoor air, Durian, Mealybug	Indoor air, Durian, Mealybug, Day 6	Indoor air, Durian, Mealybug, Day 6-7	Ripened	Indoor air, Durian, Mealybug, Ripened
Red	5.73879	5.43477	9.45373	101.091	37.2	50.05	GT03_20250421_091541	1.7452e+09	93	6	GT03	Indoor air, Durian, Mealybug	Indoor air, Durian, Mealybug, Day 6	Indoor air, Durian, Mealybug, Day 6-7	Ripened	Indoor air, Durian, Mealybug, Ripened
Red	5.14167	10.1859	13.2234	90.2168	37.17	50	GT03_20250421_091541	1.7452e+09	94	6	GT03	Indoor air, Durian, Mealybug	Indoor air, Durian, Mealybug, Day 6	Indoor air, Durian, Mealybug, Day 6-7	Ripened	Indoor air, Durian, Mealybug, Ripened
Red	5.38484	12.7484	16.7852	82.0422	37.14	50	GT03_20250421_091541	1.7452e+09	95	6	GT03	Indoor air, Durian, Mealybug	Indoor air, Durian, Mealybug, Day 6	Indoor air, Durian, Mealybug, Day 6-7	Ripened	Indoor air, Durian, Mealybug, Ripened
Red	5.67146	12.9851	17.0061	82.0769	37.13	50.04	GT03_20250421_091541	1.7452e+09	96	6	GT03	Indoor air, Durian, Mealybug	Indoor air, Durian, Mealybug, Day 6	Indoor air, Durian, Mealybug, Day 6-7	Ripened	Indoor air, Durian, Mealybug, Ripened
Red	5.03264	8.23077	11.1743	80.8747	37.13	50.24	GT03_20250421_091541	1.7452e+09	97	6	GT03	Indoor air, Durian, Mealybug	Indoor air, Durian, Mealybug, Day 6	Indoor air, Durian, Mealybug, Day 6-7	Ripened	Indoor air, Durian, Mealybug, Ripened
Red	5.7328	7.75216	10.629	83.6782	37.1	50.41	GT03_20250421_091541	1.7452e+09	98	6	GT03	Indoor air, Durian, Mealybug	Indoor air, Durian, Mealybug, Day 6	Indoor air, Durian, Mealybug, Day 6-7	Ripened	Indoor air, Durian, Mealybug, Ripened
Red	5.63613	5.13623	7.95082	89.9916	37.09	50.57	GT03_20250421_091541	1.7452e+09	99	6	GT03	Indoor air, Durian, Mealybug	Indoor air, Durian, Mealybug, Day 6	Indoor air, Durian, Mealybug, Day 6-7	Ripened	Indoor air, Durian, Mealybug, Ripened
Red	7.46407	5.60847	8.37191	99.0355	37.06	50.7	GT03_20250421_091541	1.7452e+09	100	6	GT03	Indoor air, Durian, Mealybug	Indoor air, Durian, Mealybug, Day 6	Indoor air, Durian, Mealybug, Day 6-7	Ripened	Indoor air, Durian, Mealybug, Ripened
Red	6.29735	-26.4583	-23.5238	129.569	37.49	50.85	GT03_20250422_083713	1.74529e+09	71	7	GT03	Indoor air, Durian, Mealybug	Indoor air, Durian, Mealybug, Day 7	Indoor air, Durian, Mealybug, Day 6-7	Ripened	Indoor air, Durian, Mealybug, Ripened
Red	6.45621	-27.1725	-24.2692	129.363	37.48	50.93	GT03_20250422_083713	1.74529e+09	72	7	GT03	Indoor air, Durian, Mealybug	Indoor air, Durian, Mealybug, Day 7	Indoor air, Durian, Mealybug, Day 6-7	Ripened	Indoor air, Durian, Mealybug, Ripened
Red	7.31608	-26.4626	-23.6066	130.467	37.45	51.05	GT03_20250422_083713	1.74529e+09	73	7	GT03	Indoor air, Durian, Mealybug	Indoor air, Durian, Mealybug, Day 7	Indoor air, Durian, Mealybug, Day 6-7	Ripened	Indoor air, Durian, Mealybug, Ripened
Red	8.06055	-28.3643	-25.5393	135.986	37.45	51.13	GT03_20250422_083713	1.74529e+09	74	7	GT03	Indoor air, Durian, Mealybug	Indoor air, Durian, Mealybug, Day 7	Indoor air, Durian, Mealybug, Day 6-7	Ripened	Indoor air, Durian, Mealybug, Ripened
Red	8.12359	-28.7916	-27.0095	140.6	37.44	51.24	GT03_20250422_083713	1.74529e+09	75	7	GT03	Indoor air, Durian, Mealybug	Indoor air, Durian, Mealybug, Day 7	Indoor air, Durian, Mealybug, Day 6-7	Ripened	Indoor air, Durian, Mealybug, Ripened
Red	10.0482	-25.7035	-22.9102	141.331	37.42	51.21	GT03_20250422_083713	1.74529e+09	76	7	GT03	Indoor air, Durian, Mealybug	Indoor air, Durian, Mealybug, Day 7	Indoor air, Durian, Mealybug, Day 6-7	Ripened	Indoor air, Durian, Mealybug, Ripened
Red	12.121	-17.8631	-15.0206	143.213	37.38	51.08	GT03_20250422_083713	1.74529e+09	77	7	GT03	Indoor air, Durian, Mealybug	Indoor air, Durian, Mealybug, Day 7	Indoor air, Durian, Mealybug, Day 6-7	Ripened	Indoor air, Durian, Mealybug, Ripened
Red	12.4404	-15.486	-12.6047	141.814	37.38	50.98	GT03_20250422_083713	1.74529e+09	78	7	GT03	Indoor air, Durian, Mealybug	Indoor air, Durian, Mealybug, Day 7	Indoor air, Durian, Mealybug, Day 6-7	Ripened	Indoor air, Durian, Mealybug, Ripened
Red	12.5771	-8.1702	-4.2318	133.816	37.34	50.83	GT03_20250422_083713	1.74529e+09	79	7	GT03	Indoor air, Durian, Mealybug	Indoor air, Durian, Mealybug, Day 7	Indoor air, Durian, Mealybug, Day 6-7	Ripened	Indoor air, Durian, Mealybug, Ripened
Red	11.0988	-9.83314	-5.90223	126.421	37.35	50.85	GT03_20250422_083713	1.74529e+09	80	7	GT03	Indoor air, Durian, Mealybug	Indoor air, Durian, Mealybug, Day 7	Indoor air, Durian, Mealybug, Day 6-7	Ripened	Indoor air, Durian, Mealybug, Ripened
Red	11.0341	-12.2114	-8.33883	125.794	37.34	51	GT03_20250422_083713	1.74529e+09	81	7	GT03	Indoor air, Durian, Mealybug	Indoor air, Durian, Mealybug, Day 7	Indoor air, Durian, Mealybug, Day 6-7	Ripened	Indoor air, Durian, Mealybug, Ripened
Red	12.7547	-8.88865	-5.06006	126.509	37.29	51.11	GT03_20250422_083713	1.74529e+09	82	7	GT03	Indoor air, Durian, Mealybug	Indoor air, Durian, Mealybug, Day 7	Indoor air, Durian, Mealybug, Day 6-7	Ripened	Indoor air, Durian, Mealybug, Ripened
Red	11.5745	-13.8785	-11.0921	127.297	37.31	51.22	GT03_20250422_083713	1.74529e+09	83	7	GT03	Indoor air, Durian, Mealybug	Indoor air, Durian, Mealybug, Day 7	Indoor air, Durian, Mealybug, Day 6-7	Ripened	Indoor air, Durian, Mealybug, Ripened
Red	11.3829	-15.3048	-12.5416	128.936	37.31	51.28	GT03_20250422_083713	1.74529e+09	84	7	GT03	Indoor air, Durian, Mealybug	Indoor air, Durian, Mealybug, Day 7	Indoor air, Durian, Mealybug, Day 6-7	Ripened	Indoor air, Durian, Mealybug, Ripened
Red	14.1993	-11.269	-8.53805	130.831	37.26	51.36	GT03_20250422_083713	1.74529e+09	85	7	GT03	Indoor air, Durian, Mealybug	Indoor air, Durian, Mealybug, Day 7	Indoor air, Durian, Mealybug, Day 6-7	Ripened	Indoor air, Durian, Mealybug, Ripened
Red	12.7645	-15.2578	-13.5493	130.645	37.29	51.42	GT03_20250422_083713	1.74529e+09	86	7	GT03	Indoor air, Durian, Mealybug	Indoor air, Durian, Mealybug, Day 7	Indoor air, Durian, Mealybug, Day 6-7	Ripened	Indoor air, Durian, Mealybug, Ripened
Red	13.7841	-14.3593	-10.6787	132.05	37.26	51.49	GT03_20250422_083713	1.74529e+09	87	7	GT03	Indoor air, Durian, Mealybug	Indoor air, Durian, Mealybug, Day 7	Indoor air, Durian, Mealybug, Day 6-7	Ripened	Indoor air, Durian, Mealybug, Ripened
Red	14.8356	-12.223	-8.56651	134.515	37.23	51.55	GT03_20250422_083713	1.74529e+09	88	7	GT03	Indoor air, Durian, Mealybug	Indoor air, Durian, Mealybug, Day 7	Indoor air, Durian, Mealybug, Day 6-7	Ripened	Indoor air, Durian, Mealybug, Ripened
Red	15.8552	-10.3245	-6.69588	135.919	37.2	51.62	GT03_20250422_083713	1.74529e+09	89	7	GT03	Indoor air, Durian, Mealybug	Indoor air, Durian, Mealybug, Day 7	Indoor air, Durian, Mealybug, Day 6-7	Ripened	Indoor air, Durian, Mealybug, Ripened
Red	14.3884	-15.551	-11.9488	134.673	37.23	51.69	GT03_20250422_083713	1.74529e+09	90	7	GT03	Indoor air, Durian, Mealybug	Indoor air, Durian, Mealybug, Day 7	Indoor air, Durian, Mealybug, Day 6-7	Ripened	Indoor air, Durian, Mealybug, Ripened
Red	14.675	-15.3144	-11.7279	137.708	37.22	51.73	GT03_20250422_083713	1.74529e+09	91	7	GT03	Indoor air, Durian, Mealybug	Indoor air, Durian, Mealybug, Day 7	Indoor air, Durian, Mealybug, Day 6-7	Ripened	Indoor air, Durian, Mealybug, Ripened
Red	16.5234	-10.0408	-7.48274	138.663	37.17	51.8	GT03_20250422_083713	1.74529e+09	92	7	GT03	Indoor air, Durian, Mealybug	Indoor air, Durian, Mealybug, Day 7	Indoor air, Durian, Mealybug, Day 6-7	Ripened	Indoor air, Durian, Mealybug, Ripened
Red	16.7789	-8.13911	-5.55002	139.143	37.17	51.72	GT03_20250422_083713	1.74529e+09	93	7	GT03	Indoor air, Durian, Mealybug	Indoor air, Durian, Mealybug, Day 7	Indoor air, Durian, Mealybug, Day 6-7	Ripened	Indoor air, Durian, Mealybug, Ripened
Red	18.5332	-0.773133	1.87718	138.931	37.14	51.56	GT03_20250422_083713	1.74529e+09	94	7	GT03	Indoor air, Durian, Mealybug	Indoor air, Durian, Mealybug, Day 7	Indoor air, Durian, Mealybug, Day 6-7	Ripened	Indoor air, Durian, Mealybug, Ripened
Red	18.6813	2.97904	6.66758	132.082	37.12	51.46	GT03_20250422_083713	1.74529e+09	95	7	GT03	Indoor air, Durian, Mealybug	Indoor air, Durian, Mealybug, Day 7	Indoor air, Durian, Mealybug, Day 6-7	Ripened	Indoor air, Durian, Mealybug, Ripened
Red	17.2359	3.4566	6.19216	123.253	37.14	51.34	GT03_20250422_083713	1.74529e+09	96	7	GT03	Indoor air, Durian, Mealybug	Indoor air, Durian, Mealybug, Day 7	Indoor air, Durian, Mealybug, Day 6-7	Ripened	Indoor air, Durian, Mealybug, Ripened
Red	18.2439	8.91873	11.6452	120.508	37.09	51.36	GT03_20250422_083713	1.74529e+09	97	7	GT03	Indoor air, Durian, Mealybug	Indoor air, Durian, Mealybug, Day 7	Indoor air, Durian, Mealybug, Day 6-7	Ripened	Indoor air, Durian, Mealybug, Ripened
Red	18.0203	7.25473	9.95411	120.088	37.09	51.43	GT03_20250422_083713	1.74529e+09	98	7	GT03	Indoor air, Durian, Mealybug	Indoor air, Durian, Mealybug, Day 7	Indoor air, Durian, Mealybug, Day 6-7	Ripened	Indoor air, Durian, Mealybug, Ripened
Red	18.8802	7.96469	10.6168	120.192	37.06	51.55	GT03_20250422_083713	1.74529e+09	99	7	GT03	Indoor air, Durian, Mealybug	Indoor air, Durian, Mealybug, Day 7	Indoor air, Durian, Mealybug, Day 6-7	Ripened	Indoor air, Durian, Mealybug, Ripened
Red	18.433	4.63668	7.23453	123.35	37.06	51.69	GT03_20250422_083713	1.74529e+09	100	7	GT03	Indoor air, Durian, Mealybug	Indoor air, Durian, Mealybug, Day 7	Indoor air, Durian, Mealybug, Day 6-7	Ripened	Indoor air, Durian, Mealybug, Ripened
Red	7.88452	0.433459	1.89424	124.569	37.22	48.64	GT03_20250423_094801	1.74538e+09	71	8	GT03	Indoor air, Durian, Mealybug	Indoor air, Durian, Mealybug, Day 8	Indoor air, Durian, Mealybug, Day 8-9	Ripened	Indoor air, Durian, Mealybug, Ripened
Red	7.69287	-0.992831	0.4447	130.209	37.22	48.7	GT03_20250423_094801	1.74538e+09	72	8	GT03	Indoor air, Durian, Mealybug	Indoor air, Durian, Mealybug, Day 8	Indoor air, Durian, Mealybug, Day 8-9	Ripened	Indoor air, Durian, Mealybug, Ripened
Red	9.58553	1.85762	4.30238	130.879	37.2	48.68	GT03_20250423_094801	1.74538e+09	73	8	GT03	Indoor air, Durian, Mealybug	Indoor air, Durian, Mealybug, Day 8	Indoor air, Durian, Mealybug, Day 8-9	Ripened	Indoor air, Durian, Mealybug, Ripened
Red	10.2235	4.70914	7.18077	131.575	37.19	48.61	GT03_20250423_094801	1.74538e+09	74	8	GT03	Indoor air, Durian, Mealybug	Indoor air, Durian, Mealybug, Day 8	Indoor air, Durian, Mealybug, Day 8-9	Ripened	Indoor air, Durian, Mealybug, Ripened
Red	11.4995	9.41218	12.9375	119.967	37.17	48.47	GT03_20250423_094801	1.74538e+09	75	8	GT03	Indoor air, Durian, Mealybug	Indoor air, Durian, Mealybug, Day 8	Indoor air, Durian, Mealybug, Day 8-9	Ripened	Indoor air, Durian, Mealybug, Ripened
Red	11.1898	16.3027	18.8816	105.634	37.14	48.33	GT03_20250423_094801	1.74538e+09	76	8	GT03	Indoor air, Durian, Mealybug	Indoor air, Durian, Mealybug, Day 8	Indoor air, Durian, Mealybug, Day 8-9	Ripened	Indoor air, Durian, Mealybug, Ripened
Red	10.4453	18.2044	20.8143	97.1145	37.14	48.25	GT03_20250423_094801	1.74538e+09	77	8	GT03	Indoor air, Durian, Mealybug	Indoor air, Durian, Mealybug, Day 8	Indoor air, Durian, Mealybug, Day 8-9	Ripened	Indoor air, Durian, Mealybug, Ripened
Red	7.92362	19.8674	21.4847	89.5099	37.13	48.23	GT03_20250423_094801	1.74538e+09	78	8	GT03	Indoor air, Durian, Mealybug	Indoor air, Durian, Mealybug, Day 8	Indoor air, Durian, Mealybug, Day 8-9	Ripened	Indoor air, Durian, Mealybug, Ripened
Red	8.19873	22.6676	25.2881	85.3954	37.1	48.22	GT03_20250423_094801	1.74538e+09	79	8	GT03	Indoor air, Durian, Mealybug	Indoor air, Durian, Mealybug, Day 8	Indoor air, Durian, Mealybug, Day 8-9	Ripened	Indoor air, Durian, Mealybug, Ripened
Red	7.08248	18.1532	20.7392	84.3041	37.12	48.31	GT03_20250423_094801	1.74538e+09	80	8	GT03	Indoor air, Durian, Mealybug	Indoor air, Durian, Mealybug, Day 8	Indoor air, Durian, Mealybug, Day 8-9	Ripened	Indoor air, Durian, Mealybug, Ripened
Red	8.67531	20.525	22.0516	84.7781	37.07	48.46	GT03_20250423_094801	1.74538e+09	81	8	GT03	Indoor air, Durian, Mealybug	Indoor air, Durian, Mealybug, Day 8	Indoor air, Durian, Mealybug, Day 8-9	Ripened	Indoor air, Durian, Mealybug, Ripened
Red	8.94066	15.0576	16.4951	90.3956	37.07	48.69	GT03_20250423_094801	1.74538e+09	82	8	GT03	Indoor air, Durian, Mealybug	Indoor air, Durian, Mealybug, Day 8	Indoor air, Durian, Mealybug, Day 8-9	Ripened	Indoor air, Durian, Mealybug, Ripened
Red	9.81205	11.2039	13.5753	102.649	37.06	48.86	GT03_20250423_094801	1.74538e+09	83	8	GT03	Indoor air, Durian, Mealybug	Indoor air, Durian, Mealybug, Day 8	Indoor air, Durian, Mealybug, Day 8-9	Ripened	Indoor air, Durian, Mealybug, Ripened
Red	13.3525	9.53674	12.8221	118.152	37.03	49.08	GT03_20250423_094801	1.74538e+09	84	8	GT03	Indoor air, Durian, Mealybug	Indoor air, Durian, Mealybug, Day 8	Indoor air, Durian, Mealybug, Day 8-9	Ripened	Indoor air, Durian, Mealybug, Ripened
Red	12.8414	5.7333	8.95663	124.19	37.03	49.24	GT03_20250423_094801	1.74538e+09	85	8	GT03	Indoor air, Durian, Mealybug	Indoor air, Durian, Mealybug, Day 8	Indoor air, Durian, Mealybug, Day 8-9	Ripened	Indoor air, Durian, Mealybug, Ripened
Red	14.5859	4.83158	7.02391	132.709	37.03	49.32	GT03_20250423_094801	1.74538e+09	86	8	GT03	Indoor air, Durian, Mealybug	Indoor air, Durian, Mealybug, Day 8	Indoor air, Durian, Mealybug, Day 8-9	Ripened	Indoor air, Durian, Mealybug, Ripened
Red	16.35	4.8284	7.96182	136.633	37	49.47	GT03_20250423_094801	1.74538e+09	87	8	GT03	Indoor air, Durian, Mealybug	Indoor air, Durian, Mealybug, Day 8	Indoor air, Durian, Mealybug, Day 8-9	Ripened	Indoor air, Durian, Mealybug, Ripened
Red	18.7839	7.91444	11.0197	145.313	36.96	49.54	GT03_20250423_094801	1.74538e+09	88	8	GT03	Indoor air, Durian, Mealybug	Indoor air, Durian, Mealybug, Day 8	Indoor air, Durian, Mealybug, Day 8-9	Ripened	Indoor air, Durian, Mealybug, Ripened
Red	20.3687	4.82415	7.87903	149.531	36.96	49.67	GT03_20250423_094801	1.74538e+09	89	8	GT03	Indoor air, Durian, Mealybug	Indoor air, Durian, Mealybug, Day 8	Indoor air, Durian, Mealybug, Day 8-9	Ripened	Indoor air, Durian, Mealybug, Ripened
Red	21.6119	8.38669	11.4408	150.357	36.93	49.67	GT03_20250423_094801	1.74538e+09	90	8	GT03	Indoor air, Durian, Mealybug	Indoor air, Durian, Mealybug, Day 8	Indoor air, Durian, Mealybug, Day 8-9	Ripened	Indoor air, Durian, Mealybug, Ripened
Red	22.5693	13.6154	16.7351	151.654	36.92	49.5	GT03_20250423_094801	1.74538e+09	91	8	GT03	Indoor air, Durian, Mealybug	Indoor air, Durian, Mealybug, Day 8	Indoor air, Durian, Mealybug, Day 8-9	Ripened	Indoor air, Durian, Mealybug, Ripened
Red	22.1442	17.8942	21.0837	140.736	36.92	49.32	GT03_20250423_094801	1.74538e+09	92	8	GT03	Indoor air, Durian, Mealybug	Indoor air, Durian, Mealybug, Day 8	Indoor air, Durian, Mealybug, Day 8-9	Ripened	Indoor air, Durian, Mealybug, Ripened
Red	20.8026	24.5471	27.7861	125.343	36.89	49.19	GT03_20250423_094801	1.74538e+09	93	8	GT03	Indoor air, Durian, Mealybug	Indoor air, Durian, Mealybug, Day 8	Indoor air, Durian, Mealybug, Day 8-9	Ripened	Indoor air, Durian, Mealybug, Ripened
Red	20.5249	30.6753	33.9717	112.07	36.86	49.04	GT03_20250423_094801	1.74538e+09	94	8	GT03	Indoor air, Durian, Mealybug	Indoor air, Durian, Mealybug, Day 8	Indoor air, Durian, Mealybug, Day 8-9	Ripened	Indoor air, Durian, Mealybug, Ripened
Red	20.099	33.0514	35.3669	101.645	36.85	48.99	GT03_20250423_094801	1.74538e+09	95	8	GT03	Indoor air, Durian, Mealybug	Indoor air, Durian, Mealybug, Day 8	Indoor air, Durian, Mealybug, Day 8-9	Ripened	Indoor air, Durian, Mealybug, Ripened
Red	18.7804	32.577	34.9044	92.5504	36.86	48.96	GT03_20250423_094801	1.74538e+09	96	8	GT03	Indoor air, Durian, Mealybug	Indoor air, Durian, Mealybug, Day 8	Indoor air, Durian, Mealybug, Day 8-9	Ripened	Indoor air, Durian, Mealybug, Ripened
Red	18.0555	35.3773	38.7078	90.4359	36.83	48.95	GT03_20250423_094801	1.74538e+09	97	8	GT03	Indoor air, Durian, Mealybug	Indoor air, Durian, Mealybug, Day 8	Indoor air, Durian, Mealybug, Day 8-9	Ripened	Indoor air, Durian, Mealybug, Ripened
Red	17.1948	32.7646	35.0917	89.8256	36.85	48.96	GT03_20250423_094801	1.74538e+09	98	8	GT03	Indoor air, Durian, Mealybug	Indoor air, Durian, Mealybug, Day 8	Indoor air, Durian, Mealybug, Day 8-9	Ripened	Indoor air, Durian, Mealybug, Ripened
Red	17.6288	34.8506	38.1496	90.5053	36.81	49.03	GT03_20250423_094801	1.74538e+09	99	8	GT03	Indoor air, Durian, Mealybug	Indoor air, Durian, Mealybug, Day 8	Indoor air, Durian, Mealybug, Day 8-9	Ripened	Indoor air, Durian, Mealybug, Ripened
Red	18.4887	35.5606	38.8123	90.6094	36.78	49.15	GT03_20250423_094801	1.74538e+09	100	8	GT03	Indoor air, Durian, Mealybug	Indoor air, Durian, Mealybug, Day 8	Indoor air, Durian, Mealybug, Day 8-9	Ripened	Indoor air, Durian, Mealybug, Ripened
Red	42.4792	85.0871	85.7422	145.258	39.2	42.27	GT03_20250424_135352	1.74548e+09	71	9	GT03	Indoor air, Durian, Mealybug	Indoor air, Durian, Mealybug, Day 9	Indoor air, Durian, Mealybug, Day 8-9	After ripened	Indoor air, Durian, Mealybug, After ripened
Red	42.9886	84.085	85.7008	145.207	39.18	42.37	GT03_20250424_135352	1.74548e+09	72	9	GT03	Indoor air, Durian, Mealybug	Indoor air, Durian, Mealybug, Day 9	Indoor air, Durian, Mealybug, Day 8-9	After ripened	Indoor air, Durian, Mealybug, After ripened
Red	43.8485	84.795	86.3635	146.311	39.15	42.49	GT03_20250424_135352	1.74548e+09	73	9	GT03	Indoor air, Durian, Mealybug	Indoor air, Durian, Mealybug, Day 9	Indoor air, Durian, Mealybug, Day 8-9	After ripened	Indoor air, Durian, Mealybug, After ripened
Red	42.4448	78.1411	79.6404	153.679	39.17	42.67	GT03_20250424_135352	1.74548e+09	74	9	GT03	Indoor air, Durian, Mealybug	Indoor air, Durian, Mealybug, Day 9	Indoor air, Durian, Mealybug, Day 8-9	After ripened	Indoor air, Durian, Mealybug, After ripened
Red	44.8255	75.2853	76.6792	168.881	39.14	42.94	GT03_20250424_135352	1.74548e+09	75	9	GT03	Indoor air, Durian, Mealybug	Indoor air, Durian, Mealybug, Day 9	Indoor air, Durian, Mealybug, Day 8-9	After ripened	Indoor air, Durian, Mealybug, After ripened
Red	48.6969	73.4317	73.7594	176.134	39.13	43.11	GT03_20250424_135352	1.74548e+09	76	9	GT03	Indoor air, Durian, Mealybug	Indoor air, Durian, Mealybug, Day 9	Indoor air, Durian, Mealybug, Day 8-9	After ripened	Indoor air, Durian, Mealybug, After ripened
Red	49.9631	69.867	70.1563	183.258	39.14	43.21	GT03_20250424_135352	1.74548e+09	77	9	GT03	Indoor air, Durian, Mealybug	Indoor air, Durian, Mealybug, Day 9	Indoor air, Durian, Mealybug, Day 8-9	After ripened	Indoor air, Durian, Mealybug, After ripened
Red	53.7795	73.9029	74.1598	186.153	39.09	43.29	GT03_20250424_135352	1.74548e+09	78	9	GT03	Indoor air, Durian, Mealybug	Indoor air, Durian, Mealybug, Day 9	Indoor air, Durian, Mealybug, Day 8-9	After ripened	Indoor air, Durian, Mealybug, After ripened
Red	54.1096	71.8136	72.0398	190.397	39.1	43.37	GT03_20250424_135352	1.74548e+09	79	9	GT03	Indoor air, Durian, Mealybug	Indoor air, Durian, Mealybug, Day 9	Indoor air, Durian, Mealybug, Day 8-9	After ripened	Indoor air, Durian, Mealybug, After ripened
Red	58.0972	73.4744	74.6689	195.741	39.07	43.45	GT03_20250424_135352	1.74548e+09	80	9	GT03	Indoor air, Durian, Mealybug	Indoor air, Durian, Mealybug, Day 9	Indoor air, Durian, Mealybug, Day 8-9	After ripened	Indoor air, Durian, Mealybug, After ripened
Red	58.7778	72.0973	72.253	198.14	39.07	43.55	GT03_20250424_135352	1.74548e+09	81	9	GT03	Indoor air, Durian, Mealybug	Indoor air, Durian, Mealybug, Day 9	Indoor air, Durian, Mealybug, Day 8-9	After ripened	Indoor air, Durian, Mealybug, After ripened
Red	61.8924	72.8062	72.895	203.219	39.03	43.72	GT03_20250424_135352	1.74548e+09	82	9	GT03	Indoor air, Durian, Mealybug	Indoor air, Durian, Mealybug, Day 9	Indoor air, Durian, Mealybug, Day 8-9	After ripened	Indoor air, Durian, Mealybug, After ripened
Red	61.9252	74.9467	75.09	203.785	39.04	43.58	GT03_20250424_135352	1.74548e+09	83	9	GT03	Indoor air, Durian, Mealybug	Indoor air, Durian, Mealybug, Day 9	Indoor air, Durian, Mealybug, Day 8-9	After ripened	Indoor air, Durian, Mealybug, After ripened
Red	64.8595	87.3026	87.5492	206.784	38.99	43.31	GT03_20250424_135352	1.74548e+09	84	9	GT03	Indoor air, Durian, Mealybug	Indoor air, Durian, Mealybug, Day 9	Indoor air, Durian, Mealybug, Day 8-9	After ripened	Indoor air, Durian, Mealybug, After ripened
Red	61.4992	93.9596	94.3344	184.493	39	42.98	GT03_20250424_135352	1.74548e+09	85	9	GT03	Indoor air, Durian, Mealybug	Indoor air, Durian, Mealybug, Day 9	Indoor air, Durian, Mealybug, Day 8-9	After ripened	Indoor air, Durian, Mealybug, After ripened
Red	57.2206	98.1851	98.5666	164.713	38.96	42.96	GT03_20250424_135352	1.74548e+09	86	9	GT03	Indoor air, Durian, Mealybug	Indoor air, Durian, Mealybug, Day 9	Indoor air, Durian, Mealybug, Day 8-9	After ripened	Indoor air, Durian, Mealybug, After ripened
Red	56.4753	98.1841	98.5459	162.688	38.95	43.01	GT03_20250424_135352	1.74548e+09	87	9	GT03	Indoor air, Durian, Mealybug	Indoor air, Durian, Mealybug, Day 9	Indoor air, Durian, Mealybug, Day 8-9	After ripened	Indoor air, Durian, Mealybug, After ripened
Red	55.8693	94.5703	95.9091	162.052	38.96	43.07	GT03_20250424_135352	1.74548e+09	88	9	GT03	Indoor air, Durian, Mealybug	Indoor air, Durian, Mealybug, Day 9	Indoor air, Durian, Mealybug, Day 8-9	After ripened	Indoor air, Durian, Mealybug, After ripened
Red	56.7611	95.5179	96.8133	164.216	38.93	43.18	GT03_20250424_135352	1.74548e+09	89	9	GT03	Indoor air, Durian, Mealybug	Indoor air, Durian, Mealybug, Day 9	Indoor air, Durian, Mealybug, Day 8-9	After ripened	Indoor air, Durian, Mealybug, After ripened
Red	57.5047	91.7134	92.9272	164.229	38.92	43.39	GT03_20250424_135352	1.74548e+09	90	9	GT03	Indoor air, Durian, Mealybug	Indoor air, Durian, Mealybug, Day 9	Indoor air, Durian, Mealybug, Day 8-9	After ripened	Indoor air, Durian, Mealybug, After ripened
Red	59.6627	89.0964	90.2283	175.517	38.9	43.6	GT03_20250424_135352	1.74548e+09	91	9	GT03	Indoor air, Durian, Mealybug	Indoor air, Durian, Mealybug, Day 9	Indoor air, Durian, Mealybug, Day 8-9	After ripened	Indoor air, Durian, Mealybug, After ripened
Red	61.598	87.7182	87.7917	186.891	38.89	43.75	GT03_20250424_135352	1.74548e+09	92	9	GT03	Indoor air, Durian, Mealybug	Indoor air, Durian, Mealybug, Day 9	Indoor air, Durian, Mealybug, Day 8-9	After ripened	Indoor air, Durian, Mealybug, After ripened
Red	65.1713	88.1915	89.2335	198.96	38.87	43.83	GT03_20250424_135352	1.74548e+09	93	9	GT03	Indoor air, Durian, Mealybug	Indoor air, Durian, Mealybug, Day 9	Indoor air, Durian, Mealybug, Day 8-9	After ripened	Indoor air, Durian, Mealybug, After ripened
Red	65.3301	88.4773	88.488	200.754	38.86	43.91	GT03_20250424_135352	1.74548e+09	94	9	GT03	Indoor air, Durian, Mealybug	Indoor air, Durian, Mealybug, Day 9	Indoor air, Durian, Mealybug, Day 8-9	After ripened	Indoor air, Durian, Mealybug, After ripened
Red	67.7437	87.7621	87.7219	200.523	38.84	44.04	GT03_20250424_135352	1.74548e+09	95	9	GT03	Indoor air, Durian, Mealybug	Indoor air, Durian, Mealybug, Day 9	Indoor air, Durian, Mealybug, Day 8-9	After ripened	Indoor air, Durian, Mealybug, After ripened
Red	70.5086	89.6616	89.6132	200.953	38.82	44.06	GT03_20250424_135352	1.74548e+09	96	9	GT03	Indoor air, Durian, Mealybug	Indoor air, Durian, Mealybug, Day 9	Indoor air, Durian, Mealybug, Day 8-9	After ripened	Indoor air, Durian, Mealybug, After ripened
Red	71.4323	91.847	91.759	201.177	38.79	44.16	GT03_20250424_135352	1.74548e+09	97	9	GT03	Indoor air, Durian, Mealybug	Indoor air, Durian, Mealybug, Day 9	Indoor air, Durian, Mealybug, Day 8-9	After ripened	Indoor air, Durian, Mealybug, After ripened
Red	72.1768	89.9453	89.8263	202.696	38.79	44.24	GT03_20250424_135352	1.74548e+09	98	9	GT03	Indoor air, Durian, Mealybug	Indoor air, Durian, Mealybug, Day 9	Indoor air, Durian, Mealybug, Day 8-9	After ripened	Indoor air, Durian, Mealybug, After ripened
Red	74.4111	86.1429	85.9816	207.76	38.8	44.35	GT03_20250424_135352	1.74548e+09	99	9	GT03	Indoor air, Durian, Mealybug	Indoor air, Durian, Mealybug, Day 9	Indoor air, Durian, Mealybug, Day 8-9	After ripened	Indoor air, Durian, Mealybug, After ripened
Red	77.1218	96.8348	97.7496	210.338	38.75	44.15	GT03_20250424_135352	1.74548e+09	100	9	GT03	Indoor air, Durian, Mealybug	Indoor air, Durian, Mealybug, Day 9	Indoor air, Durian, Mealybug, Day 8-9	After ripened	Indoor air, Durian, Mealybug, After ripened
Blue	-27.0593	-87.7827	-88.8113	-32.3775	38.3	46.83	GT04_20250418_155354	1744966434	71	3	GT04	Indoor air, Durian	Indoor air, Durian, Day 3	Indoor air, Durian, Day 3	Before ripened	Indoor air, Durian, Before ripened
Blue	-28.7931	-91.3474	-92.4145	-34.2537	38.31	46.93	GT04_20250418_155354	1744966434	72	3	GT04	Indoor air, Durian	Indoor air, Durian, Day 3	Indoor air, Durian, Day 3	Before ripened	Indoor air, Durian, Before ripened
Blue	-30.431	-94.1989	-96.2929	-35.9496	38.32	47	GT04_20250418_155354	1744966434	73	3	GT04	Indoor air, Durian	Indoor air, Durian, Day 3	Indoor air, Durian, Day 3	Before ripened	Indoor air, Durian, Before ripened
Blue	-29.762	-93.0124	-95.1263	-35.6999	38.3	47.05	GT04_20250418_155354	1744966434	74	3	GT04	Indoor air, Durian	Indoor air, Durian, Day 3	Indoor air, Durian, Day 3	Before ripened	Indoor air, Durian, Before ripened
Blue	-30.7194	-99.2411	-100.421	-36.9969	38.31	47.22	GT04_20250418_155354	1744966434	75	3	GT04	Indoor air, Durian	Indoor air, Durian, Day 3	Indoor air, Durian, Day 3	Before ripened	Indoor air, Durian, Before ripened
Blue	-30.9553	-99.2443	-101.483	-37.0732	38.28	47.37	GT04_20250418_155354	1744966434	76	3	GT04	Indoor air, Durian	Indoor air, Durian, Day 3	Indoor air, Durian, Day 3	Before ripened	Indoor air, Durian, Before ripened
Blue	-33.1993	-104.71	-106.998	-39.4048	38.3	47.5	GT04_20250418_155354	1744966434	77	3	GT04	Indoor air, Durian	Indoor air, Durian, Day 3	Indoor air, Durian, Day 3	Before ripened	Indoor air, Durian, Before ripened
Blue	-33.359	-105.898	-108.206	-39.7054	38.3	47.55	GT04_20250418_155354	1744966434	78	3	GT04	Indoor air, Durian	Indoor air, Durian, Day 3	Indoor air, Durian, Day 3	Before ripened	Indoor air, Durian, Before ripened
Blue	-33.5826	-107.562	-109.897	-40.1262	38.3	47.62	GT04_20250418_155354	1744966434	79	3	GT04	Indoor air, Durian	Indoor air, Durian, Day 3	Indoor air, Durian, Day 3	Before ripened	Indoor air, Durian, Before ripened
Blue	-34.6784	-109.275	-111.622	-41.3065	38.3	47.65	GT04_20250418_155354	1744966434	80	3	GT04	Indoor air, Durian	Indoor air, Durian, Day 3	Indoor air, Durian, Day 3	Before ripened	Indoor air, Durian, Before ripened
Blue	-34.4344	-103.81	-106.107	-39.9748	38.28	47.52	GT04_20250418_155354	1744966434	81	3	GT04	Indoor air, Durian	Indoor air, Durian, Day 3	Indoor air, Durian, Day 3	Before ripened	Indoor air, Durian, Before ripened
Blue	-33.2215	-96.6796	-98.8796	-39.1969	38.27	47.27	GT04_20250418_155354	1744966434	82	3	GT04	Indoor air, Durian	Indoor air, Durian, Day 3	Indoor air, Durian, Day 3	Before ripened	Indoor air, Durian, Before ripened
Blue	-33.4549	-91.9745	-94.0814	-37.7543	38.27	47.03	GT04_20250418_155354	1744966434	83	3	GT04	Indoor air, Durian	Indoor air, Durian, Day 3	Indoor air, Durian, Day 3	Before ripened	Indoor air, Durian, Before ripened
Blue	-31.5729	-83.6576	-85.6878	-36.7267	38.24	46.83	GT04_20250418_155354	1744966434	84	3	GT04	Indoor air, Durian	Indoor air, Durian, Day 3	Indoor air, Durian, Day 3	Before ripened	Indoor air, Durian, Before ripened
Blue	-31.2535	-82.2805	-84.2719	-36.1256	38.24	46.73	GT04_20250418_155354	1744966434	85	3	GT04	Indoor air, Durian	Indoor air, Durian, Day 3	Indoor air, Durian, Day 3	Before ripened	Indoor air, Durian, Before ripened
Blue	-31.6794	-79.9044	-81.8767	-35.5499	38.23	46.68	GT04_20250418_155354	1744966434	86	3	GT04	Indoor air, Durian	Indoor air, Durian, Day 3	Indoor air, Durian, Day 3	Before ripened	Indoor air, Durian, Before ripened
Blue	-31.9669	-82.0438	-84.051	-36.0909	38.23	46.77	GT04_20250418_155354	1744966434	87	3	GT04	Indoor air, Durian	Indoor air, Durian, Day 3	Indoor air, Durian, Day 3	Before ripened	Indoor air, Durian, Before ripened
Blue	-32.3502	-85.8964	-86.9501	-36.8122	38.23	46.89	GT04_20250418_155354	1744966434	88	3	GT04	Indoor air, Durian	Indoor air, Durian, Day 3	Indoor air, Durian, Day 3	Before ripened	Indoor air, Durian, Before ripened
Blue	-31.3625	-84.2356	-86.3211	-36.4677	38.2	46.97	GT04_20250418_155354	1744966434	89	3	GT04	Indoor air, Durian	Indoor air, Durian, Day 3	Indoor air, Durian, Day 3	Before ripened	Indoor air, Durian, Before ripened
Blue	-32.587	-87.8024	-89.9656	-37.3948	38.19	47.17	GT04_20250418_155354	1744966434	90	3	GT04	Indoor air, Durian	Indoor air, Durian, Day 3	Indoor air, Durian, Day 3	Before ripened	Indoor air, Durian, Before ripened
Blue	-32.9064	-90.1795	-92.3815	-37.9959	38.19	47.27	GT04_20250418_155354	1744966434	91	3	GT04	Indoor air, Durian	Indoor air, Durian, Day 3	Indoor air, Durian, Day 3	Before ripened	Indoor air, Durian, Before ripened
Blue	-33.2258	-92.5567	-94.7974	-38.597	38.19	47.37	GT04_20250418_155354	1744966434	92	3	GT04	Indoor air, Durian	Indoor air, Durian, Day 3	Indoor air, Durian, Day 3	Before ripened	Indoor air, Durian, Before ripened
Blue	-33.0039	-95.6982	-98.0131	-39.1888	38.17	47.56	GT04_20250418_155354	1744966434	93	3	GT04	Indoor air, Durian	Indoor air, Durian, Day 3	Indoor air, Durian, Day 3	Before ripened	Indoor air, Durian, Before ripened
Blue	-33.2399	-95.7014	-98.0752	-39.265	38.14	47.71	GT04_20250418_155354	1744966434	94	3	GT04	Indoor air, Durian	Indoor air, Durian, Day 3	Indoor air, Durian, Day 3	Before ripened	Indoor air, Durian, Before ripened
Blue	-34.6116	-102.118	-104.557	-40.8372	38.16	47.88	GT04_20250418_155354	1744966434	95	3	GT04	Indoor air, Durian	Indoor air, Durian, Day 3	Indoor air, Durian, Day 3	Before ripened	Indoor air, Durian, Before ripened
Blue	-33.2415	-99.507	-101.982	-40.2776	38.12	47.97	GT04_20250418_155354	1744966434	96	3	GT04	Indoor air, Durian	Indoor air, Durian, Day 3	Indoor air, Durian, Day 3	Before ripened	Indoor air, Durian, Before ripened
Blue	-33.6568	-102.597	-105.123	-42.0591	38.12	48.1	GT04_20250418_155354	1744966434	97	3	GT04	Indoor air, Durian	Indoor air, Durian, Day 3	Indoor air, Durian, Day 3	Before ripened	Indoor air, Durian, Before ripened
Blue	-32.3489	-96.6565	-99.1244	-40.6071	38.1	47.95	GT04_20250418_155354	1744966434	98	3	GT04	Indoor air, Durian	Indoor air, Durian, Day 3	Indoor air, Durian, Day 3	Before ripened	Indoor air, Durian, Before ripened
Blue	-31.3596	-92.1901	-94.5885	-39.25	38.09	47.77	GT04_20250418_155354	1744966434	99	3	GT04	Indoor air, Durian	Indoor air, Durian, Day 3	Indoor air, Durian, Day 3	Before ripened	Indoor air, Durian, Before ripened
Blue	-30.7003	-83.6345	-85.9327	-37.1369	38.07	47.51	GT04_20250418_155354	1744966434	100	3	GT04	Indoor air, Durian	Indoor air, Durian, Day 3	Indoor air, Durian, Day 3	Before ripened	Indoor air, Durian, Before ripened
Blue	-26.872	-88.1883	-89.7901	-22.2627	37.03	51.93	GT04_20250419_102932	1745033372	71	4	GT04	Indoor air, Durian	Indoor air, Durian, Day 4	Indoor air, Durian, Day 4-5	Before ripened	Indoor air, Durian, Before ripened
Blue	-25.1178	-80.8223	-83.3629	-20.4756	37	51.77	GT04_20250419_102932	1745033372	72	4	GT04	Indoor air, Durian	Indoor air, Durian, Day 4	Indoor air, Durian, Day 4-5	Before ripened	Indoor air, Durian, Before ripened
Blue	-24.257	-79.2096	-80.7468	-19.8652	36.98	51.76	GT04_20250419_102932	1745033372	73	4	GT04	Indoor air, Durian	Indoor air, Durian, Day 4	Indoor air, Durian, Day 4-5	Before ripened	Indoor air, Durian, Before ripened
Blue	-24.7992	-81.348	-82.9004	-20.3808	36.99	51.8	GT04_20250419_102932	1745033372	74	4	GT04	Indoor air, Durian	Indoor air, Durian, Day 4	Indoor air, Durian, Day 4-5	Before ripened	Indoor air, Durian, Before ripened
Blue	-23.461	-79.9751	-80.5673	-19.8813	36.95	51.9	GT04_20250419_102932	1745033372	75	4	GT04	Indoor air, Durian	Indoor air, Durian, Day 4	Indoor air, Durian, Day 4-5	Before ripened	Indoor air, Durian, Before ripened
Blue	-23.5888	-80.9259	-81.5336	-20.1218	36.95	51.94	GT04_20250419_102932	1745033372	76	4	GT04	Indoor air, Durian	Indoor air, Durian, Day 4	Indoor air, Durian, Day 4-5	Before ripened	Indoor air, Durian, Before ripened
Blue	-22.6766	-76.1769	-77.8053	-19.0466	36.9	51.99	GT04_20250419_102932	1745033372	77	4	GT04	Indoor air, Durian	Indoor air, Durian, Day 4	Indoor air, Durian, Day 4-5	Before ripened	Indoor air, Durian, Before ripened
Blue	-23.7289	-80.216	-81.8709	-20.0177	36.92	52.06	GT04_20250419_102932	1745033372	78	4	GT04	Indoor air, Durian	Indoor air, Durian, Day 4	Indoor air, Durian, Day 4-5	Before ripened	Indoor air, Durian, Before ripened
Blue	-23.2835	-81.6935	-82.3955	-20.1887	36.9	52.18	GT04_20250419_102932	1745033372	79	4	GT04	Indoor air, Durian	Indoor air, Durian, Day 4	Indoor air, Durian, Day 4-5	Before ripened	Indoor air, Durian, Before ripened
Blue	-23.3801	-84.3095	-85.0737	-20.8754	36.89	52.34	GT04_20250419_102932	1745033372	80	4	GT04	Indoor air, Durian	Indoor air, Durian, Day 4	Indoor air, Durian, Day 4-5	Before ripened	Indoor air, Durian, Before ripened
Blue	-23.1893	-84.786	-85.5776	-21.021	36.88	52.41	GT04_20250419_102932	1745033372	81	4	GT04	Indoor air, Durian	Indoor air, Durian, Day 4	Indoor air, Durian, Day 4-5	Before ripened	Indoor air, Durian, Before ripened
Blue	-22.2656	-83.6006	-85.4317	-20.7967	36.85	52.51	GT04_20250419_102932	1745033372	82	4	GT04	Indoor air, Durian	Indoor air, Durian, Day 4	Indoor air, Durian, Day 4-5	Before ripened	Indoor air, Durian, Before ripened
Blue	-22.553	-86.74	-88.606	-20.3377	36.85	52.6	GT04_20250419_102932	1745033372	83	4	GT04	Indoor air, Durian	Indoor air, Durian, Day 4	Indoor air, Durian, Day 4-5	Before ripened	Indoor air, Durian, Before ripened
Blue	-22.1075	-87.2176	-89.1306	-20.5088	36.83	52.72	GT04_20250419_102932	1745033372	84	4	GT04	Indoor air, Durian	Indoor air, Durian, Day 4	Indoor air, Durian, Day 4-5	Before ripened	Indoor air, Durian, Before ripened
Blue	-20.993	-86.5087	-88.4886	-20.4301	36.79	52.89	GT04_20250419_102932	1745033372	85	4	GT04	Indoor air, Durian	Indoor air, Durian, Day 4	Indoor air, Durian, Day 4-5	Before ripened	Indoor air, Durian, Before ripened
Blue	-21.7579	-88.4083	-90.38	-20.8601	36.81	52.87	GT04_20250419_102932	1745033372	86	4	GT04	Indoor air, Durian	Indoor air, Durian, Day 4	Indoor air, Durian, Day 4-5	Before ripened	Indoor air, Durian, Before ripened
Blue	-20.0356	-81.28	-83.1944	-19.1331	36.78	52.72	GT04_20250419_102932	1745033372	87	4	GT04	Indoor air, Durian	Indoor air, Durian, Day 4	Indoor air, Durian, Day 4-5	Before ripened	Indoor air, Durian, Before ripened
Blue	-19.5245	-78.4765	-80.3289	-18.1713	36.78	52.56	GT04_20250419_102932	1745033372	88	4	GT04	Indoor air, Durian	Indoor air, Durian, Day 4	Indoor air, Durian, Day 4-5	Before ripened	Indoor air, Durian, Before ripened
Blue	-18.6319	-75.6261	-77.4712	-18.5008	36.76	52.54	GT04_20250419_102932	1745033372	89	4	GT04	Indoor air, Durian	Indoor air, Durian, Day 4	Indoor air, Durian, Day 4-5	Before ripened	Indoor air, Durian, Before ripened
Blue	-17.9939	-72.7746	-74.5928	-17.8049	36.75	52.47	GT04_20250419_102932	1745033372	90	4	GT04	Indoor air, Durian	Indoor air, Durian, Day 4	Indoor air, Durian, Day 4-5	Before ripened	Indoor air, Durian, Before ripened
Blue	-16.9104	-70.4006	-72.239	-17.2801	36.72	52.52	GT04_20250419_102932	1745033372	91	4	GT04	Indoor air, Durian	Indoor air, Durian, Day 4	Indoor air, Durian, Day 4-5	Before ripened	Indoor air, Durian, Before ripened
Blue	-17.7516	-71.1148	-73.9845	-17.4858	36.71	52.6	GT04_20250419_102932	1745033372	92	4	GT04	Indoor air, Durian	Indoor air, Durian, Day 4	Indoor air, Durian, Day 4-5	Before ripened	Indoor air, Durian, Before ripened
Blue	-17.2733	-70.4519	-72.3141	-17.0905	36.7	52.58	GT04_20250419_102932	1745033372	93	4	GT04	Indoor air, Durian	Indoor air, Durian, Day 4	Indoor air, Durian, Day 4-5	Before ripened	Indoor air, Durian, Before ripened
Blue	-16.2218	-68.3156	-70.2019	-16.6257	36.67	52.64	GT04_20250419_102932	1745033372	94	4	GT04	Indoor air, Durian	Indoor air, Durian, Day 4	Indoor air, Durian, Day 4-5	Before ripened	Indoor air, Durian, Before ripened
Blue	-16.9236	-71.6426	-73.5634	-17.4419	36.68	52.73	GT04_20250419_102932	1745033372	95	4	GT04	Indoor air, Durian	Indoor air, Durian, Day 4	Indoor air, Durian, Day 4-5	Before ripened	Indoor air, Durian, Before ripened
Blue	-15.6494	-69.7451	-72.7135	-17.0627	36.64	52.85	GT04_20250419_102932	1745033372	96	4	GT04	Indoor air, Durian	Indoor air, Durian, Day 4	Indoor air, Durian, Day 4-5	Before ripened	Indoor air, Durian, Before ripened
Blue	-16.0646	-73.8354	-75.8542	-17.8441	36.64	52.98	GT04_20250419_102932	1745033372	97	4	GT04	Indoor air, Durian	Indoor air, Durian, Day 4	Indoor air, Durian, Day 4-5	Before ripened	Indoor air, Durian, Before ripened
Blue	-15.3006	-73.8386	-75.9163	-17.9203	36.61	53.13	GT04_20250419_102932	1745033372	98	4	GT04	Indoor air, Durian	Indoor air, Durian, Day 4	Indoor air, Durian, Day 4-5	Before ripened	Indoor air, Durian, Before ripened
Blue	-15.7158	-76.9289	-79.0569	-18.7018	36.61	53.26	GT04_20250419_102932	1745033372	99	4	GT04	Indoor air, Durian	Indoor air, Durian, Day 4	Indoor air, Durian, Day 4-5	Before ripened	Indoor air, Durian, Before ripened
Blue	-14.5374	-76.7445	-78.9318	-18.5029	36.57	53.41	GT04_20250419_102932	1745033372	100	4	GT04	Indoor air, Durian	Indoor air, Durian, Day 4	Indoor air, Durian, Day 4-5	Before ripened	Indoor air, Durian, Before ripened
Blue	-18.9807	-66.5326	-66.2685	-14.6432	37.14	53.13	GT04_20250420_103614	1745120174	71	5	GT04	Indoor air, Durian	Indoor air, Durian, Day 5	Indoor air, Durian, Day 4-5	Before ripened	Indoor air, Durian, Before ripened
Blue	-18.2469	-62.9679	-63.6653	-13.7669	37.13	53.03	GT04_20250420_103614	1745120174	72	5	GT04	Indoor air, Durian	Indoor air, Durian, Day 5	Indoor air, Durian, Day 4-5	Before ripened	Indoor air, Durian, Before ripened
Blue	-18.8529	-65.5817	-66.3021	-14.4027	37.14	53.09	GT04_20250420_103614	1745120174	73	5	GT04	Indoor air, Durian	Indoor air, Durian, Day 5	Indoor air, Durian, Day 4-5	Before ripened	Indoor air, Durian, Before ripened
Blue	-17.6106	-63.922	-65.6938	-14.0836	37.1	53.22	GT04_20250420_103614	1745120174	74	5	GT04	Indoor air, Durian	Indoor air, Durian, Day 5	Indoor air, Durian, Day 4-5	Before ripened	Indoor air, Durian, Before ripened
Blue	-16.7507	-63.212	-65.0311	-13.9795	37.07	53.34	GT04_20250420_103614	1745120174	75	5	GT04	Indoor air, Durian	Indoor air, Durian, Day 5	Indoor air, Durian, Day 4-5	Before ripened	Indoor air, Durian, Before ripened
Blue	-18.2937	-68.2532	-69.1381	-15.0014	37.07	53.51	GT04_20250420_103614	1745120174	76	5	GT04	Indoor air, Durian	Indoor air, Durian, Day 5	Indoor air, Durian, Day 4-5	Before ripened	Indoor air, Durian, Before ripened
Blue	-17.1464	-65.4038	-66.3011	-14.3563	37.04	53.54	GT04_20250420_103614	1745120174	77	5	GT04	Indoor air, Durian	Indoor air, Durian, Day 5	Indoor air, Durian, Day 4-5	Before ripened	Indoor air, Durian, Before ripened
Blue	-17.8172	-70.3958	-71.3745	-15.6187	37.04	53.75	GT04_20250420_103614	1745120174	78	5	GT04	Indoor air, Durian	Indoor air, Durian, Day 5	Indoor air, Durian, Day 4-5	Before ripened	Indoor air, Durian, Before ripened
Blue	-16.5748	-68.7361	-70.7662	-15.2996	37	53.88	GT04_20250420_103614	1745120174	79	5	GT04	Indoor air, Durian	Indoor air, Durian, Day 5	Indoor air, Durian, Day 4-5	Before ripened	Indoor air, Durian, Before ripened
Blue	-16.7984	-70.4001	-72.4573	-14.7203	37	53.95	GT04_20250420_103614	1745120174	80	5	GT04	Indoor air, Durian	Indoor air, Durian, Day 5	Indoor air, Durian, Day 4-5	Before ripened	Indoor air, Durian, Before ripened
Blue	-15.7158	-70.9289	-73.0569	-14.7018	36.96	54.13	GT04_20250420_103614	1745120174	81	5	GT04	Indoor air, Durian	Indoor air, Durian, Day 5	Indoor air, Durian, Day 4-5	Before ripened	Indoor air, Durian, Before ripened
Blue	-16.525	-71.4054	-73.5608	-14.8474	36.95	54.2	GT04_20250420_103614	1745120174	82	5	GT04	Indoor air, Durian	Indoor air, Durian, Day 5	Indoor air, Durian, Day 4-5	Before ripened	Indoor air, Durian, Before ripened
Blue	-16.8764	-74.0202	-76.2183	-15.5086	36.95	54.31	GT04_20250420_103614	1745120174	83	5	GT04	Indoor air, Durian	Indoor air, Durian, Day 5	Indoor air, Durian, Day 4-5	Before ripened	Indoor air, Durian, Before ripened
Blue	-16.0484	-74.548	-75.7972	-15.4647	36.92	54.44	GT04_20250420_103614	1745120174	84	5	GT04	Indoor air, Durian	Indoor air, Durian, Day 5	Indoor air, Durian, Day 4-5	Before ripened	Indoor air, Durian, Before ripened
Blue	-15.4432	-73.837	-75.1138	-14.3352	36.9	54.51	GT04_20250420_103614	1745120174	85	5	GT04	Indoor air, Durian	Indoor air, Durian, Day 5	Indoor air, Durian, Day 4-5	Before ripened	Indoor air, Durian, Before ripened
Blue	-14.5817	-69.3214	-70.5443	-13.2185	36.89	54.37	GT04_20250420_103614	1745120174	86	5	GT04	Indoor air, Durian	Indoor air, Durian, Day 5	Indoor air, Durian, Day 4-5	Before ripened	Indoor air, Durian, Before ripened
Blue	-14.1025	-65.7557	-66.9205	-12.3168	36.89	54.22	GT04_20250420_103614	1745120174	87	5	GT04	Indoor air, Durian	Indoor air, Durian, Day 5	Indoor air, Durian, Day 4-5	Before ripened	Indoor air, Durian, Before ripened
Blue	-11.169	-56.3026	-57.4147	-9.8245	36.83	54.08	GT04_20250420_103614	1745120174	88	5	GT04	Indoor air, Durian	Indoor air, Durian, Day 5	Indoor air, Durian, Day 4-5	Before ripened	Indoor air, Durian, Before ripened
Blue	-10.8496	-53.9255	-54.9988	-10.2234	36.83	53.98	GT04_20250420_103614	1745120174	89	5	GT04	Indoor air, Durian	Indoor air, Durian, Day 5	Indoor air, Durian, Day 4-5	Before ripened	Indoor air, Durian, Before ripened
Blue	-11.5826	-55.5874	-56.6485	-10.5933	36.85	53.95	GT04_20250420_103614	1745120174	90	5	GT04	Indoor air, Durian	Indoor air, Durian, Day 5	Indoor air, Durian, Day 4-5	Before ripened	Indoor air, Durian, Before ripened
Blue	-10.6269	-54.1643	-56.2611	-10.3089	36.82	54.04	GT04_20250420_103614	1745120174	91	5	GT04	Indoor air, Durian	Indoor air, Durian, Day 5	Indoor air, Durian, Day 4-5	Before ripened	Indoor air, Durian, Before ripened
Blue	-9.83089	-54.9297	-56.0816	-10.3251	36.79	54.18	GT04_20250420_103614	1745120174	92	5	GT04	Indoor air, Durian	Indoor air, Durian, Day 5	Indoor air, Durian, Day 4-5	Before ripened	Indoor air, Durian, Before ripened
Blue	-9.86368	-57.0702	-58.2766	-10.8915	36.78	54.32	GT04_20250420_103614	1745120174	93	5	GT04	Indoor air, Durian	Indoor air, Durian, Day 5	Indoor air, Durian, Day 4-5	Before ripened	Indoor air, Durian, Before ripened
Blue	-10.1316	-57.3111	-58.5803	-11.0278	36.75	54.48	GT04_20250420_103614	1745120174	94	5	GT04	Indoor air, Durian	Indoor air, Durian, Day 5	Indoor air, Durian, Day 4-5	Before ripened	Indoor air, Durian, Before ripened
Blue	-10.3232	-58.7374	-60.0298	-11.3885	36.75	54.54	GT04_20250420_103614	1745120174	95	5	GT04	Indoor air, Durian	Indoor air, Durian, Day 5	Indoor air, Durian, Day 4-5	Before ripened	Indoor air, Durian, Before ripened
Blue	-9.46334	-59.0275	-59.3671	-11.2844	36.72	54.66	GT04_20250420_103614	1745120174	96	5	GT04	Indoor air, Durian	Indoor air, Durian, Day 5	Indoor air, Durian, Day 4-5	Before ripened	Indoor air, Durian, Before ripened
Blue	-8.92203	-58.7919	-60.1669	-11.2751	36.7	54.75	GT04_20250420_103614	1745120174	97	5	GT04	Indoor air, Durian	Indoor air, Durian, Day 5	Indoor air, Durian, Day 4-5	Before ripened	Indoor air, Durian, Before ripened
Blue	-9.11368	-60.2182	-61.6165	-11.6358	36.7	54.81	GT04_20250420_103614	1745120174	98	5	GT04	Indoor air, Durian	Indoor air, Durian, Day 5	Indoor air, Durian, Day 4-5	Before ripened	Indoor air, Durian, Before ripened
Blue	-8.2538	-59.5082	-60.9538	-11.5317	36.67	54.93	GT04_20250420_103614	1745120174	99	5	GT04	Indoor air, Durian	Indoor air, Durian, Day 5	Indoor air, Durian, Day 4-5	Before ripened	Indoor air, Durian, Before ripened
Blue	-7.64861	-58.7972	-60.2704	-11.4022	36.65	55	GT04_20250420_103614	1745120174	100	5	GT04	Indoor air, Durian	Indoor air, Durian, Day 5	Indoor air, Durian, Day 4-5	Before ripened	Indoor air, Durian, Before ripened
Blue	-24.0943	-66.3839	-67.4467	18.6304	38.02	49.99	GT04_20250421_093151	1.7452e+09	71	6	GT04	Indoor air, Durian	Indoor air, Durian, Day 6	Indoor air, Durian, Day 6-7	Before ripened	Indoor air, Durian, Before ripened
Blue	-25.8601	-70.1862	-71.2914	19.694	38.03	50.1	GT04_20250421_093151	1.7452e+09	72	6	GT04	Indoor air, Durian	Indoor air, Durian, Day 6	Indoor air, Durian, Day 6-7	Before ripened	Indoor air, Durian, Before ripened
Blue	-24.5539	-69.0511	-69.1999	23.1333	37.99	50.21	GT04_20250421_093151	1.7452e+09	73	6	GT04	Indoor air, Durian	Indoor air, Durian, Day 6	Indoor air, Durian, Day 6-7	Before ripened	Indoor air, Durian, Before ripened
Blue	-23.9487	-68.34	-68.5165	24.2628	37.97	50.28	GT04_20250421_093151	1.7452e+09	74	6	GT04	Indoor air, Durian	Indoor air, Durian, Day 6	Indoor air, Durian, Day 6-7	Before ripened	Indoor air, Durian, Before ripened
Blue	-24.6178	-69.5265	-69.6831	24.0131	37.99	50.23	GT04_20250421_093151	1.7452e+09	75	6	GT04	Indoor air, Durian	Indoor air, Durian, Day 6	Indoor air, Durian, Day 6-7	Before ripened	Indoor air, Durian, Before ripened
Blue	-23.5318	-61.4442	-61.469	26.0569	37.99	49.89	GT04_20250421_093151	1.7452e+09	76	6	GT04	Indoor air, Durian	Indoor air, Durian, Day 6	Indoor air, Durian, Day 6-7	Before ripened	Indoor air, Durian, Before ripened
Blue	-21.3623	-51.9879	-51.9011	25.6254	37.96	49.6	GT04_20250421_093151	1.7452e+09	77	6	GT04	Indoor air, Durian	Indoor air, Durian, Day 6	Indoor air, Durian, Day 6-7	Before ripened	Indoor air, Durian, Before ripened
Blue	-20.3845	-42.9579	-43.7828	23.8334	37.93	49.37	GT04_20250421_093151	1.7452e+09	78	6	GT04	Indoor air, Durian	Indoor air, Durian, Day 6	Indoor air, Durian, Day 6-7	Before ripened	Indoor air, Durian, Before ripened
Blue	-19.7146	-40.8687	-40.6628	20.5894	37.92	49.29	GT04_20250421_093151	1.7452e+09	79	6	GT04	Indoor air, Durian	Indoor air, Durian, Day 6	Indoor air, Durian, Day 6-7	Before ripened	Indoor air, Durian, Before ripened
Blue	-19.2167	-37.3072	-37.1218	18.3894	37.88	49.34	GT04_20250421_093151	1.7452e+09	80	6	GT04	Indoor air, Durian	Indoor air, Durian, Day 6	Indoor air, Durian, Day 6-7	Before ripened	Indoor air, Durian, Before ripened
Blue	-19.7278	-42.1106	-40.9872	17.4276	37.88	49.5	GT04_20250421_093151	1.7452e+09	81	6	GT04	Indoor air, Durian	Indoor air, Durian, Day 6	Indoor air, Durian, Day 6-7	Before ripened	Indoor air, Durian, Before ripened
Blue	-19.3781	-43.3013	-42.2366	17.0762	37.86	49.65	GT04_20250421_093151	1.7452e+09	82	6	GT04	Indoor air, Durian	Indoor air, Durian, Day 6	Indoor air, Durian, Day 6-7	Before ripened	Indoor air, Durian, Before ripened
Blue	-19.7614	-46.1539	-46.1356	16.3549	37.86	49.77	GT04_20250421_093151	1.7452e+09	83	6	GT04	Indoor air, Durian	Indoor air, Durian, Day 6	Indoor air, Durian, Day 6-7	Before ripened	Indoor air, Durian, Before ripened
Blue	-18.9973	-46.1571	-46.1977	18.2787	37.83	49.92	GT04_20250421_093151	1.7452e+09	84	6	GT04	Indoor air, Durian	Indoor air, Durian, Day 6	Indoor air, Durian, Day 6-7	Before ripened	Indoor air, Durian, Before ripened
Blue	-20.3806	-49.0097	-49.0968	18.5573	37.83	50.04	GT04_20250421_093151	1.7452e+09	85	6	GT04	Indoor air, Durian	Indoor air, Durian, Day 6	Indoor air, Durian, Day 6-7	Before ripened	Indoor air, Durian, Before ripened
Blue	-19.4569	-47.8243	-48.951	19.7816	37.8	50.14	GT04_20250421_093151	1.7452e+09	86	6	GT04	Indoor air, Durian	Indoor air, Durian, Day 6	Indoor air, Durian, Day 6-7	Before ripened	Indoor air, Durian, Before ripened
Blue	-18.6805	-49.4883	-50.6421	20.3609	37.8	50.21	GT04_20250421_093151	1.7452e+09	87	6	GT04	Indoor air, Durian	Indoor air, Durian, Day 6	Indoor air, Durian, Day 6-7	Before ripened	Indoor air, Durian, Before ripened
Blue	-18.936	-52.39	-52.5748	19.88	37.8	50.29	GT04_20250421_093151	1.7452e+09	88	6	GT04	Indoor air, Durian	Indoor air, Durian, Day 6	Indoor air, Durian, Day 6-7	Before ripened	Indoor air, Durian, Before ripened
Blue	-17.534	-49.5417	-49.7585	22.4996	37.76	50.37	GT04_20250421_093151	1.7452e+09	89	6	GT04	Indoor air, Durian	Indoor air, Durian, Day 6	Indoor air, Durian, Day 6-7	Before ripened	Indoor air, Durian, Before ripened
Blue	-17.6626	-52.3953	-52.6783	21.7529	37.75	50.54	GT04_20250421_093151	1.7452e+09	90	6	GT04	Indoor air, Durian	Indoor air, Durian, Day 6	Indoor air, Durian, Day 6-7	Before ripened	Indoor air, Durian, Before ripened
Blue	-20.3849	-60.5236	-59.8639	23.0258	37.78	50.69	GT04_20250421_093151	1.7452e+09	91	6	GT04	Indoor air, Durian	Indoor air, Durian, Day 6	Indoor air, Durian, Day 6-7	Before ripened	Indoor air, Durian, Before ripened
Blue	-17.8338	-51.0203	-50.3038	25.3032	37.73	50.54	GT04_20250421_093151	1.7452e+09	92	6	GT04	Indoor air, Durian	Indoor air, Durian, Day 6	Indoor air, Durian, Day 6-7	Before ripened	Indoor air, Durian, Before ripened
Blue	-15.1541	-38.6634	-37.8239	28.3272	37.69	50.22	GT04_20250421_093151	1.7452e+09	93	6	GT04	Indoor air, Durian	Indoor air, Durian, Day 6	Indoor air, Durian, Day 6-7	Before ripened	Indoor air, Durian, Before ripened
Blue	-14.5153	-33.9091	-33.9921	25.5294	37.69	50.02	GT04_20250421_093151	1.7452e+09	94	6	GT04	Indoor air, Durian	Indoor air, Durian, Day 6	Indoor air, Durian, Day 6-7	Before ripened	Indoor air, Durian, Before ripened
Blue	-15.0362	-31.3434	-31.3683	23.4311	37.69	49.87	GT04_20250421_093151	1.7452e+09	95	6	GT04	Indoor air, Durian	Indoor air, Durian, Day 6	Indoor air, Durian, Day 6-7	Before ripened	Indoor air, Durian, Before ripened
Blue	-13.5383	-27.7819	-27.8272	21.231	37.65	49.92	GT04_20250421_093151	1.7452e+09	96	6	GT04	Indoor air, Durian	Indoor air, Durian, Day 6	Indoor air, Durian, Day 6-7	Before ripened	Indoor air, Durian, Before ripened
Blue	-15.4203	-37.0987	-36.2208	19.2034	37.68	50.12	GT04_20250421_093151	1.7452e+09	97	6	GT04	Indoor air, Durian	Indoor air, Durian, Day 6	Indoor air, Durian, Day 6-7	Before ripened	Indoor air, Durian, Before ripened
Blue	-14.0822	-34.7258	-33.8876	19.7029	37.64	50.22	GT04_20250421_093151	1.7452e+09	98	6	GT04	Indoor air, Durian	Indoor air, Durian, Day 6	Indoor air, Durian, Day 6-7	Before ripened	Indoor air, Durian, Before ripened
Blue	-12.744	-32.3529	-32.5545	20.2023	37.6	50.32	GT04_20250421_093151	1.7452e+09	99	6	GT04	Indoor air, Durian	Indoor air, Durian, Day 6	Indoor air, Durian, Day 6-7	Before ripened	Indoor air, Durian, Before ripened
Blue	-13.1593	-35.4432	-35.6952	20.4209	37.6	50.45	GT04_20250421_093151	1.7452e+09	100	6	GT04	Indoor air, Durian	Indoor air, Durian, Day 6	Indoor air, Durian, Day 6-7	Before ripened	Indoor air, Durian, Before ripened
Blue	-13.4173	-53.6901	-55.3374	30.2896	38.2	51.1	GT04_20250422_085626	1.74529e+09	71	7	GT04	Indoor air, Durian	Indoor air, Durian, Day 7	Indoor air, Durian, Day 6-7	Before ripened	Indoor air, Durian, Before ripened
Blue	-12.152	-42.5207	-44.0448	33.0386	38.17	50.78	GT04_20250422_085626	1.74529e+09	72	7	GT04	Indoor air, Durian	Indoor air, Durian, Day 7	Indoor air, Durian, Day 6-7	Before ripened	Indoor air, Durian, Before ripened
Blue	-11.3215	-37.3401	-39.7634	33.6014	38.17	50.52	GT04_20250422_085626	1.74529e+09	73	7	GT04	Indoor air, Durian	Indoor air, Durian, Day 7	Indoor air, Durian, Day 6-7	Before ripened	Indoor air, Durian, Before ripened
Blue	-9.56728	-29.9741	-32.3362	31.3886	38.14	50.36	GT04_20250422_085626	1.74529e+09	74	7	GT04	Indoor air, Durian	Indoor air, Durian, Day 7	Indoor air, Durian, Day 6-7	Before ripened	Indoor air, Durian, Before ripened
Blue	-9.85475	-32.1136	-34.5105	27.8476	38.14	50.45	GT04_20250422_085626	1.74529e+09	75	7	GT04	Indoor air, Durian	Indoor air, Durian, Day 7	Indoor air, Durian, Day 6-7	Before ripened	Indoor air, Durian, Before ripened
Blue	-10.238	-34.9662	-37.4096	27.1263	38.14	50.57	GT04_20250422_085626	1.74529e+09	76	7	GT04	Indoor air, Durian	Indoor air, Durian, Day 7	Indoor air, Durian, Day 6-7	Before ripened	Indoor air, Durian, Before ripened
Blue	-9.51745	-32.6435	-34.1308	27.8407	38.09	50.68	GT04_20250422_085626	1.74529e+09	77	7	GT04	Indoor air, Durian	Indoor air, Durian, Day 7	Indoor air, Durian, Day 6-7	Before ripened	Indoor air, Durian, Before ripened
Blue	-9.86881	-35.2583	-37.7883	28.1795	38.09	50.79	GT04_20250422_085626	1.74529e+09	78	7	GT04	Indoor air, Durian	Indoor air, Durian, Day 7	Indoor air, Durian, Day 6-7	Before ripened	Indoor air, Durian, Before ripened
Blue	-8.97699	-34.3107	-36.8841	28.3437	38.06	50.9	GT04_20250422_085626	1.74529e+09	79	7	GT04	Indoor air, Durian	Indoor air, Durian, Day 7	Indoor air, Durian, Day 6-7	Before ripened	Indoor air, Durian, Before ripened
Blue	-8.9459	-35.9757	-38.5959	27.8975	38.05	51.02	GT04_20250422_085626	1.74529e+09	80	7	GT04	Indoor air, Durian	Indoor air, Durian, Day 7	Indoor air, Durian, Day 6-7	Before ripened	Indoor air, Durian, Before ripened
Blue	-8.62818	-37.4041	-40.0868	28.486	38.03	51.18	GT04_20250422_085626	1.74529e+09	81	7	GT04	Indoor air, Durian	Indoor air, Durian, Day 7	Indoor air, Durian, Day 6-7	Before ripened	Indoor air, Durian, Before ripened
Blue	-9.5332	-39.5938	-41.3155	28.1601	38.02	51.28	GT04_20250422_085626	1.74529e+09	82	7	GT04	Indoor air, Durian	Indoor air, Durian, Day 7	Indoor air, Durian, Day 6-7	Before ripened	Indoor air, Durian, Before ripened
Blue	-7.97231	-37.4596	-39.2446	30.574	37.97	51.44	GT04_20250422_085626	1.74529e+09	83	7	GT04	Indoor air, Durian	Indoor air, Durian, Day 7	Indoor air, Durian, Day 6-7	Before ripened	Indoor air, Durian, Before ripened
Blue	-8.32366	-40.0745	-41.9021	31.9127	37.97	51.55	GT04_20250422_085626	1.74529e+09	84	7	GT04	Indoor air, Durian	Indoor air, Durian, Day 7	Indoor air, Durian, Day 6-7	Before ripened	Indoor air, Durian, Before ripened
Blue	-7.33602	-38.4137	-40.2731	33.2573	37.94	51.63	GT04_20250422_085626	1.74529e+09	85	7	GT04	Indoor air, Durian	Indoor air, Durian, Day 7	Indoor air, Durian, Day 6-7	Before ripened	Indoor air, Durian, Before ripened
Blue	-7.17716	-39.1279	-41.0186	34.0515	37.93	51.71	GT04_20250422_085626	1.74529e+09	86	7	GT04	Indoor air, Durian	Indoor air, Durian, Day 7	Indoor air, Durian, Day 6-7	Before ripened	Indoor air, Durian, Before ripened
Blue	-6.0937	-36.7539	-38.6648	34.5764	37.9	51.76	GT04_20250422_085626	1.74529e+09	87	7	GT04	Indoor air, Durian	Indoor air, Durian, Day 7	Indoor air, Durian, Day 6-7	Before ripened	Indoor air, Durian, Before ripened
Blue	-5.83902	-36.755	-38.6855	34.5509	37.89	51.81	GT04_20250422_085626	1.74529e+09	88	7	GT04	Indoor air, Durian	Indoor air, Durian, Day 7	Indoor air, Durian, Day 6-7	Before ripened	Indoor air, Durian, Before ripened
Blue	-4.68998	-31.1	-31.9416	36.2086	37.88	51.58	GT04_20250422_085626	1.74529e+09	89	7	GT04	Indoor air, Durian	Indoor air, Durian, Day 7	Indoor air, Durian, Day 6-7	Before ripened	Indoor air, Durian, Before ripened
Blue	-3.6998	-23.7309	-25.4523	38.072	37.88	51.27	GT04_20250422_085626	1.74529e+09	90	7	GT04	Indoor air, Durian	Indoor air, Durian, Day 7	Indoor air, Durian, Day 6-7	Before ripened	Indoor air, Durian, Before ripened
Blue	-3.45579	-19.2656	-20.9372	35.4037	37.86	51.14	GT04_20250422_085626	1.74529e+09	91	7	GT04	Indoor air, Durian	Indoor air, Durian, Day 7	Indoor air, Durian, Day 6-7	Before ripened	Indoor air, Durian, Before ripened
Blue	-1.76629	-14.2778	-15.9466	32.5644	37.82	51.13	GT04_20250422_085626	1.74529e+09	92	7	GT04	Indoor air, Durian	Indoor air, Durian, Day 7	Indoor air, Durian, Day 6-7	Before ripened	Indoor air, Durian, Before ripened
Blue	-1.28886	-14.5176	-17.2296	32.4534	37.8	51.24	GT04_20250422_085626	1.74529e+09	93	7	GT04	Indoor air, Durian	Indoor air, Durian, Day 7	Indoor air, Durian, Day 6-7	Before ripened	Indoor air, Durian, Before ripened
Blue	-1.19389	-15.7073	-18.4582	32.1275	37.79	51.34	GT04_20250422_085626	1.74529e+09	94	7	GT04	Indoor air, Durian	Indoor air, Durian, Day 7	Indoor air, Durian, Day 6-7	Before ripened	Indoor air, Durian, Before ripened
Blue	0.0803775	-13.8098	-16.6083	32.5067	37.75	51.46	GT04_20250422_085626	1.74529e+09	95	7	GT04	Indoor air, Durian	Indoor air, Durian, Day 7	Indoor air, Durian, Day 6-7	Before ripened	Indoor air, Durian, Before ripened
Blue	-0.65427	-19.2772	-22.1648	32.1241	37.75	51.69	GT04_20250422_085626	1.74529e+09	96	7	GT04	Indoor air, Durian	Indoor air, Durian, Day 7	Indoor air, Durian, Day 6-7	Before ripened	Indoor air, Durian, Before ripened
Blue	0.10978	-20.2804	-22.2269	32.0479	37.72	51.84	GT04_20250422_085626	1.74529e+09	97	7	GT04	Indoor air, Durian	Indoor air, Durian, Day 7	Indoor air, Durian, Day 6-7	Before ripened	Indoor air, Durian, Before ripened
Blue	-0.401279	-24.0839	-26.0924	32.0861	37.72	52	GT04_20250422_085626	1.74529e+09	98	7	GT04	Indoor air, Durian	Indoor air, Durian, Day 7	Indoor air, Durian, Day 6-7	Before ripened	Indoor air, Durian, Before ripened
Blue	0.872985	-22.1864	-24.2425	35.4653	37.68	52.12	GT04_20250422_085626	1.74529e+09	99	7	GT04	Indoor air, Durian	Indoor air, Durian, Day 7	Indoor air, Durian, Day 6-7	Before ripened	Indoor air, Durian, Before ripened
Blue	0.425808	-25.5144	-27.6247	35.6238	37.68	52.26	GT04_20250422_085626	1.74529e+09	100	7	GT04	Indoor air, Durian	Indoor air, Durian, Day 7	Indoor air, Durian, Day 6-7	Before ripened	Indoor air, Durian, Before ripened
Blue	-18.1349	-54.3757	-52.524	22.7702	37.58	50.01	GT04_20250423_095653	1.74538e+09	71	8	GT04	Indoor air, Durian	Indoor air, Durian, Day 8	Indoor air, Durian, Day 8-9	Ripened	Indoor air, Durian, Ripened
Blue	-19.1357	-56.2785	-55.4774	22.2639	37.57	50.14	GT04_20250423_095653	1.74538e+09	72	8	GT04	Indoor air, Durian	Indoor air, Durian, Day 8	Indoor air, Durian, Day 8-9	Ripened	Indoor air, Durian, Ripened
Blue	-18.3593	-57.9425	-57.1686	23.8431	37.57	50.21	GT04_20250423_095653	1.74538e+09	73	8	GT04	Indoor air, Durian	Indoor air, Durian, Day 8	Indoor air, Durian, Day 8-9	Ripened	Indoor air, Durian, Ripened
Blue	-16.2563	-53.67	-52.9441	24.7726	37.51	50.33	GT04_20250423_095653	1.74538e+09	74	8	GT04	Indoor air, Durian	Indoor air, Durian, Day 8	Indoor air, Durian, Day 8-9	Ripened	Indoor air, Durian, Ripened
Blue	-17.1809	-56.7581	-56.0434	25.042	37.53	50.36	GT04_20250423_095653	1.74538e+09	75	8	GT04	Indoor air, Durian	Indoor air, Durian, Day 8	Indoor air, Durian, Day 8-9	Ripened	Indoor air, Durian, Ripened
Blue	-15.0761	-48.6801	-47.9121	26.9841	37.49	50.22	GT04_20250423_095653	1.74538e+09	76	8	GT04	Indoor air, Durian	Indoor air, Durian, Day 8	Indoor air, Durian, Day 8-9	Ripened	Indoor air, Durian, Ripened
Blue	-13.3849	-39.8867	-39.0147	28.1573	37.47	49.95	GT04_20250423_095653	1.74538e+09	77	8	GT04	Indoor air, Durian	Indoor air, Durian, Day 8	Indoor air, Durian, Day 8-9	Ripened	Indoor air, Durian, Ripened
Blue	-14.778	-36.3702	-35.4245	27.2994	37.47	49.76	GT04_20250423_095653	1.74538e+09	78	8	GT04	Indoor air, Durian	Indoor air, Durian, Day 8	Indoor air, Durian, Day 8-9	Ripened	Indoor air, Durian, Ripened
Blue	-12.5783	-30.4817	-28.5219	24.9155	37.42	49.72	GT04_20250423_095653	1.74538e+09	79	8	GT04	Indoor air, Durian	Indoor air, Durian, Day 8	Indoor air, Durian, Day 8-9	Ripened	Indoor air, Durian, Ripened
Blue	-12.7061	-31.4326	-30.4882	23.6751	37.42	49.76	GT04_20250423_095653	1.74538e+09	80	8	GT04	Indoor air, Durian	Indoor air, Durian, Day 8	Indoor air, Durian, Day 8-9	Ripened	Indoor air, Durian, Ripened
Blue	-12.6111	-32.6222	-31.7169	23.3491	37.41	49.86	GT04_20250423_095653	1.74538e+09	81	8	GT04	Indoor air, Durian	Indoor air, Durian, Day 8	Indoor air, Durian, Day 8-9	Ripened	Indoor air, Durian, Ripened
Blue	-12.58	-34.2873	-33.4287	22.9029	37.4	49.98	GT04_20250423_095653	1.74538e+09	82	8	GT04	Indoor air, Durian	Indoor air, Durian, Day 8	Indoor air, Durian, Day 8-9	Ripened	Indoor air, Durian, Ripened
Blue	-12.9633	-38.1399	-36.3278	22.1816	37.4	50.1	GT04_20250423_095653	1.74538e+09	83	8	GT04	Indoor air, Durian	Indoor air, Durian, Day 8	Indoor air, Durian, Day 8-9	Ripened	Indoor air, Durian, Ripened
Blue	-11.7521	-34.815	-33.0076	24.9469	37.37	50.11	GT04_20250423_095653	1.74538e+09	84	8	GT04	Indoor air, Durian	Indoor air, Durian, Day 8	Indoor air, Durian, Day 8-9	Ripened	Indoor air, Durian, Ripened
Blue	-12.1673	-37.9053	-36.1483	24.1654	37.37	50.24	GT04_20250423_095653	1.74538e+09	85	8	GT04	Indoor air, Durian	Indoor air, Durian, Day 8	Indoor air, Durian, Day 8-9	Ripened	Indoor air, Durian, Ripened
Blue	-10.7653	-35.057	-33.332	24.7851	37.33	50.32	GT04_20250423_095653	1.74538e+09	86	8	GT04	Indoor air, Durian	Indoor air, Durian, Day 8	Indoor air, Durian, Day 8-9	Ripened	Indoor air, Durian, Ripened
Blue	-10.3837	-36.01	-34.3398	24.4938	37.31	50.46	GT04_20250423_095653	1.74538e+09	87	8	GT04	Indoor air, Durian	Indoor air, Durian, Day 8	Indoor air, Durian, Day 8-9	Ripened	Indoor air, Durian, Ripened
Blue	-10.3845	-37.9128	-36.2932	26.9875	37.3	50.59	GT04_20250423_095653	1.74538e+09	88	8	GT04	Indoor air, Durian	Indoor air, Durian, Day 8	Indoor air, Durian, Day 8-9	Ripened	Indoor air, Durian, Ripened
Blue	-10.1937	-38.3893	-36.7971	26.8419	37.29	50.66	GT04_20250423_095653	1.74538e+09	89	8	GT04	Indoor air, Durian	Indoor air, Durian, Day 8	Indoor air, Durian, Day 8-9	Ripened	Indoor air, Durian, Ripened
Blue	-11.2896	-39.1024	-38.5218	26.6615	37.29	50.69	GT04_20250423_095653	1.74538e+09	90	8	GT04	Indoor air, Durian	Indoor air, Durian, Day 8	Indoor air, Durian, Day 8-9	Ripened	Indoor air, Durian, Ripened
Blue	-10.4936	-38.8679	-38.3423	27.6454	37.26	50.83	GT04_20250423_095653	1.74538e+09	91	8	GT04	Indoor air, Durian	Indoor air, Durian, Day 8	Indoor air, Durian, Day 8-9	Ripened	Indoor air, Durian, Ripened
Blue	-10.7172	-41.5319	-40.0335	27.2246	37.26	50.9	GT04_20250423_095653	1.74538e+09	92	8	GT04	Indoor air, Durian	Indoor air, Durian, Day 8	Indoor air, Durian, Day 8-9	Ripened	Indoor air, Durian, Ripened
Blue	-9.60092	-37.0174	-35.4846	28.3159	37.24	50.81	GT04_20250423_095653	1.74538e+09	93	8	GT04	Indoor air, Durian	Indoor air, Durian, Day 8	Indoor air, Durian, Day 8-9	Ripened	Indoor air, Durian, Ripened
Blue	-7.08095	-25.8491	-24.2127	31.0394	37.2	50.54	GT04_20250423_095653	1.74538e+09	94	8	GT04	Indoor air, Durian	Indoor air, Durian, Day 8	Indoor air, Durian, Day 8-9	Ripened	Indoor air, Durian, Ripened
Blue	-7.15465	-19.9553	-18.2066	30.7826	37.2	50.25	GT04_20250423_095653	1.74538e+09	95	8	GT04	Indoor air, Durian	Indoor air, Durian, Day 8	Indoor air, Durian, Day 8-9	Ripened	Indoor air, Durian, Ripened
Blue	-7.6125	-17.817	-16.053	27.2982	37.19	50.21	GT04_20250423_095653	1.74538e+09	96	8	GT04	Indoor air, Durian	Indoor air, Durian, Day 8	Indoor air, Durian, Day 8-9	Ripened	Indoor air, Durian, Ripened
Blue	-6.72068	-16.8693	-15.1487	27.4623	37.16	50.32	GT04_20250423_095653	1.74538e+09	97	8	GT04	Indoor air, Durian	Indoor air, Durian, Day 8	Indoor air, Durian, Day 8-9	Ripened	Indoor air, Durian, Ripened
Blue	-5.86081	-16.1593	-14.486	27.5664	37.13	50.44	GT04_20250423_095653	1.74538e+09	98	8	GT04	Indoor air, Durian	Indoor air, Durian, Day 8	Indoor air, Durian, Day 8-9	Ripened	Indoor air, Durian, Ripened
Blue	-5.92553	-19.5375	-17.9226	26.9399	37.12	50.59	GT04_20250423_095653	1.74538e+09	99	8	GT04	Indoor air, Durian	Indoor air, Durian, Day 8	Indoor air, Durian, Day 8-9	Ripened	Indoor air, Durian, Ripened
Blue	-6.37271	-22.8656	-21.3049	27.0984	37.12	50.73	GT04_20250423_095653	1.74538e+09	100	8	GT04	Indoor air, Durian	Indoor air, Durian, Day 8	Indoor air, Durian, Day 8-9	Ripened	Indoor air, Durian, Ripened
Blue	-10.1595	35.696	36.0612	42.924	39.37	43.05	GT04_20250424_140138	1.74548e+09	71	9	GT04	Indoor air, Durian	Indoor air, Durian, Day 9	Indoor air, Durian, Day 8-9	After ripened	Indoor air, Durian, After ripened
Blue	-10.2234	35.2205	35.578	41.8038	39.37	43.07	GT04_20250424_140138	1.74548e+09	72	9	GT04	Indoor air, Durian	Indoor air, Durian, Day 9	Indoor air, Durian, Day 8-9	After ripened	Indoor air, Durian, After ripened
Blue	-9.01217	38.5454	38.8982	42.5691	39.34	43.08	GT04_20250424_140138	1.74548e+09	73	9	GT04	Indoor air, Durian	Indoor air, Durian, Day 9	Indoor air, Durian, Day 8-9	After ripened	Indoor air, Durian, After ripened
Blue	-9.39547	35.6928	35.9991	41.8478	39.34	43.2	GT04_20250424_140138	1.74548e+09	74	9	GT04	Indoor air, Durian	Indoor air, Durian, Day 9	Indoor air, Durian, Day 8-9	After ripened	Indoor air, Durian, After ripened
Blue	-8.63142	34.6896	34.937	41.7715	39.31	43.35	GT04_20250424_140138	1.74548e+09	75	9	GT04	Indoor air, Durian	Indoor air, Durian, Day 9	Indoor air, Durian, Day 8-9	After ripened	Indoor air, Durian, After ripened
Blue	-9.55686	29.6987	29.8843	41.5346	39.32	43.51	GT04_20250424_140138	1.74548e+09	76	9	GT04	Indoor air, Durian	Indoor air, Durian, Day 9	Indoor air, Durian, Day 8-9	After ripened	Indoor air, Durian, After ripened
Blue	-9.01556	29.9342	30.0845	42.5439	39.3	43.6	GT04_20250424_140138	1.74548e+09	77	9	GT04	Indoor air, Durian	Indoor air, Durian, Day 9	Indoor air, Durian, Day 8-9	After ripened	Indoor air, Durian, After ripened
Blue	-7.96403	32.0705	31.1967	45.0086	39.27	43.66	GT04_20250424_140138	1.74548e+09	78	9	GT04	Indoor air, Durian	Indoor air, Durian, Day 9	Indoor air, Durian, Day 8-9	After ripened	Indoor air, Durian, After ripened
Blue	-7.39078	32.5438	31.6385	45.078	39.25	43.74	GT04_20250424_140138	1.74548e+09	79	9	GT04	Indoor air, Durian	Indoor air, Durian, Day 9	Indoor air, Durian, Day 8-9	After ripened	Indoor air, Durian, After ripened
Blue	-6.30732	34.9178	33.9923	46.6029	39.22	43.79	GT04_20250424_140138	1.74548e+09	80	9	GT04	Indoor air, Durian	Indoor air, Durian, Day 9	Indoor air, Durian, Day 8-9	After ripened	Indoor air, Durian, After ripened
Blue	-6.49982	30.5887	30.5894	45.7359	39.21	43.98	GT04_20250424_140138	1.74548e+09	81	9	GT04	Indoor air, Durian	Indoor air, Durian, Day 9	Indoor air, Durian, Day 8-9	After ripened	Indoor air, Durian, After ripened
Blue	-7.20252	25.359	25.2744	45.4135	39.21	44.2	GT04_20250424_140138	1.74548e+09	82	9	GT04	Indoor air, Durian	Indoor air, Durian, Day 9	Indoor air, Durian, Day 8-9	After ripened	Indoor air, Durian, After ripened
Blue	-5.79965	29.1101	30.0441	47.5394	39.18	44.15	GT04_20250424_140138	1.74548e+09	83	9	GT04	Indoor air, Durian	Indoor air, Durian, Day 9	Indoor air, Durian, Day 8-9	After ripened	Indoor air, Durian, After ripened
Blue	-4.39508	37.6668	37.7206	49.678	39.17	43.84	GT04_20250424_140138	1.74548e+09	84	9	GT04	Indoor air, Durian	Indoor air, Durian, Day 9	Indoor air, Durian, Day 8-9	After ripened	Indoor air, Durian, After ripened
Blue	-4.9036	39.5717	39.7155	50.2351	39.2	43.61	GT04_20250424_140138	1.74548e+09	85	9	GT04	Indoor air, Durian	Indoor air, Durian, Day 9	Indoor air, Durian, Day 8-9	After ripened	Indoor air, Durian, After ripened
Blue	-3.34102	44.5113	44.6931	48.6616	39.17	43.51	GT04_20250424_140138	1.74548e+09	86	9	GT04	Indoor air, Durian	Indoor air, Durian, Day 9	Indoor air, Durian, Day 8-9	After ripened	Indoor air, Durian, After ripened
Blue	-3.76777	44.9847	45.1349	45.731	39.15	43.59	GT04_20250424_140138	1.74548e+09	87	9	GT04	Indoor air, Durian	Indoor air, Durian, Day 9	Indoor air, Durian, Day 8-9	After ripened	Indoor air, Durian, After ripened
Blue	-4.29035	44.7448	44.8519	45.6201	39.13	43.7	GT04_20250424_140138	1.74548e+09	88	9	GT04	Indoor air, Durian	Indoor air, Durian, Day 9	Indoor air, Durian, Day 8-9	After ripened	Indoor air, Durian, After ripened
Blue	-2.9522	46.1177	46.185	46.1195	39.09	43.8	GT04_20250424_140138	1.74548e+09	89	9	GT04	Indoor air, Durian	Indoor air, Durian, Day 9	Indoor air, Durian, Day 8-9	After ripened	Indoor air, Durian, After ripened
Blue	-3.23967	43.9783	44.0107	45.5785	39.09	43.89	GT04_20250424_140138	1.74548e+09	90	9	GT04	Indoor air, Durian	Indoor air, Durian, Day 9	Indoor air, Durian, Day 8-9	After ripened	Indoor air, Durian, After ripened
Blue	-2.66642	44.4516	44.4525	47.6479	39.07	43.97	GT04_20250424_140138	1.74548e+09	91	9	GT04	Indoor air, Durian	Indoor air, Durian, Day 9	Indoor air, Durian, Day 8-9	After ripened	Indoor air, Durian, After ripened
Blue	-1.50756	43.7374	43.707	47.4421	39.06	44.05	GT04_20250424_140138	1.74548e+09	92	9	GT04	Indoor air, Durian	Indoor air, Durian, Day 9	Indoor air, Durian, Day 8-9	After ripened	Indoor air, Durian, After ripened
Blue	-0.934311	44.2107	43.1488	48.5115	39.04	44.13	GT04_20250424_140138	1.74548e+09	93	9	GT04	Indoor air, Durian	Indoor air, Durian, Day 9	Indoor air, Durian, Day 8-9	After ripened	Indoor air, Durian, After ripened
Blue	-1.06208	43.2598	43.1825	49.2711	39.04	44.17	GT04_20250424_140138	1.74548e+09	94	9	GT04	Indoor air, Durian	Indoor air, Durian, Day 9	Indoor air, Durian, Day 8-9	After ripened	Indoor air, Durian, After ripened
Blue	-0.839334	42.021	41.9202	49.1856	39.03	44.23	GT04_20250424_140138	1.74548e+09	95	9	GT04	Indoor air, Durian	Indoor air, Durian, Day 9	Indoor air, Durian, Day 8-9	After ripened	Indoor air, Durian, After ripened
Blue	0.212188	44.1573	44.0324	49.6503	39	44.29	GT04_20250424_140138	1.74548e+09	96	9	GT04	Indoor air, Durian	Indoor air, Durian, Day 9	Indoor air, Durian, Day 8-9	After ripened	Indoor air, Durian, After ripened
Blue	-0.0114007	42.4933	42.3413	51.2295	39	44.36	GT04_20250424_140138	1.74548e+09	97	9	GT04	Indoor air, Durian	Indoor air, Durian, Day 9	Indoor air, Durian, Day 8-9	After ripened	Indoor air, Durian, After ripened
Blue	-1.23584	38.9265	38.6967	50.3025	38.99	44.56	GT04_20250424_140138	1.74548e+09	98	9	GT04	Indoor air, Durian	Indoor air, Durian, Day 9	Indoor air, Durian, Day 8-9	After ripened	Indoor air, Durian, After ripened
Blue	0.400451	37.9725	37.6682	51.9858	38.96	44.75	GT04_20250424_140138	1.74548e+09	99	9	GT04	Indoor air, Durian	Indoor air, Durian, Day 9	Indoor air, Durian, Day 8-9	After ripened	Indoor air, Durian, After ripened
Blue	1.51585	39.5841	40.2636	53.5707	38.93	44.79	GT04_20250424_140138	1.74548e+09	100	9	GT04	Indoor air, Durian	Indoor air, Durian, Day 9	Indoor air, Durian, Day 8-9	After ripened	Indoor air, Durian, After ripened
Blue	-23.1734	-99.1094	-99.0914	21.3968	37.58	50.14	GT05_20250418_162159	1744968120	71	3	GT05	Indoor air, Durian	Indoor air, Durian, Day 3	Indoor air, Durian, Day 3	Before ripened	Indoor air, Durian, Before ripened
Blue	-23.2693	-99.8225	-99.8161	23.2164	37.58	50.17	GT05_20250418_162159	1744968120	72	3	GT05	Indoor air, Durian	Indoor air, Durian, Day 3	Indoor air, Durian, Day 3	Before ripened	Indoor air, Durian, Before ripened
Blue	-22.4077	-95.307	-95.2466	24.3331	37.57	50.03	GT05_20250418_162159	1744968120	73	3	GT05	Indoor air, Durian	Indoor air, Durian, Day 3	Indoor air, Durian, Day 3	Before ripened	Indoor air, Durian, Before ripened
Blue	-20.6526	-87.0382	-86.866	26.6266	37.55	49.74	GT05_20250418_162159	1744968120	74	3	GT05	Indoor air, Durian	Indoor air, Durian, Day 3	Indoor air, Durian, Day 3	Before ripened	Indoor air, Durian, Before ripened
Blue	-20.2489	-80.3843	-80.1429	24.2588	37.53	49.56	GT05_20250418_162159	1744968120	75	3	GT05	Indoor air, Durian	Indoor air, Durian, Day 3	Indoor air, Durian, Day 3	Before ripened	Indoor air, Durian, Before ripened
Blue	-19.8337	-77.294	-78.0022	20.0402	37.53	49.43	GT05_20250418_162159	1744968120	76	3	GT05	Indoor air, Durian	Indoor air, Durian, Day 3	Indoor air, Durian, Day 3	Before ripened	Indoor air, Durian, Before ripened
Blue	-18.6659	-70.6433	-71.3412	18.5962	37.48	49.4	GT05_20250418_162159	1744968120	77	3	GT05	Indoor air, Durian	Indoor air, Durian, Day 3	Indoor air, Durian, Day 3	Before ripened	Indoor air, Durian, Before ripened
Blue	-19.2081	-73.7817	-74.4948	15.0807	37.49	49.44	GT05_20250418_162159	1744968120	78	3	GT05	Indoor air, Durian	Indoor air, Durian, Day 3	Indoor air, Durian, Day 3	Before ripened	Indoor air, Durian, Before ripened
Blue	-19.4636	-75.6834	-76.4275	14.5998	37.49	49.52	GT05_20250418_162159	1744968120	79	3	GT05	Indoor air, Durian	Indoor air, Durian, Day 3	Indoor air, Durian, Day 3	Before ripened	Indoor air, Durian, Before ripened
Blue	-19.2532	-74.2614	-75.0608	14.8588	37.45	49.66	GT05_20250418_162159	1744968120	80	3	GT05	Indoor air, Durian	Indoor air, Durian, Day 3	Indoor air, Durian, Day 3	Before ripened	Indoor air, Durian, Before ripened
Blue	-18.1706	-73.7902	-74.6604	14.8773	37.41	49.84	GT05_20250418_162159	1744968120	81	3	GT05	Indoor air, Durian	Indoor air, Durian, Day 3	Indoor air, Durian, Day 3	Before ripened	Indoor air, Durian, Before ripened
Blue	-19.1599	-79.2566	-80.1963	14.5202	37.42	50.02	GT05_20250418_162159	1744968120	82	3	GT05	Indoor air, Durian	Indoor air, Durian, Day 3	Indoor air, Durian, Day 3	Before ripened	Indoor air, Durian, Before ripened
Blue	-17.8857	-77.3591	-78.3463	17.8994	37.38	50.14	GT05_20250418_162159	1744968120	83	3	GT05	Indoor air, Durian	Indoor air, Durian, Day 3	Indoor air, Durian, Day 3	Before ripened	Indoor air, Durian, Before ripened
Blue	-17.4287	-81.4003	-82.4534	18.8775	37.38	50.31	GT05_20250418_162159	1744968120	84	3	GT05	Indoor air, Durian	Indoor air, Durian, Day 3	Indoor air, Durian, Day 3	Before ripened	Indoor air, Durian, Before ripened
Blue	-17.3656	-82.8276	-83.9236	21.4915	37.37	50.42	GT05_20250418_162159	1744968120	85	3	GT05	Indoor air, Durian	Indoor air, Durian, Day 3	Indoor air, Durian, Day 3	Before ripened	Indoor air, Durian, Before ripened
Blue	-16.7924	-82.3543	-83.4818	22.5609	37.35	50.5	GT05_20250418_162159	1744968120	86	3	GT05	Indoor air, Durian	Indoor air, Durian, Day 3	Indoor air, Durian, Day 3	Before ripened	Indoor air, Durian, Before ripened
Blue	-16.3788	-83.0696	-84.248	24.3297	37.33	50.63	GT05_20250418_162159	1744968120	87	3	GT05	Indoor air, Durian	Indoor air, Durian, Day 3	Indoor air, Durian, Day 3	Before ripened	Indoor air, Durian, Before ripened
Blue	-16.826	-86.3976	-87.6302	25.4881	37.33	50.77	GT05_20250418_162159	1744968120	88	3	GT05	Indoor air, Durian	Indoor air, Durian, Day 3	Indoor air, Durian, Day 3	Before ripened	Indoor air, Durian, Before ripened
Blue	-16.8899	-87.873	-88.1134	26.3679	37.33	50.79	GT05_20250418_162159	1744968120	89	3	GT05	Indoor air, Durian	Indoor air, Durian, Day 3	Indoor air, Durian, Day 3	Before ripened	Indoor air, Durian, Before ripened
Blue	-14.9759	-79.3185	-79.4783	28.4556	37.3	50.58	GT05_20250418_162159	1744968120	90	3	GT05	Indoor air, Durian	Indoor air, Durian, Day 3	Indoor air, Durian, Day 3	Before ripened	Indoor air, Durian, Before ripened
Blue	-13.9227	-73.3767	-73.4592	29.933	37.29	50.38	GT05_20250418_162159	1744968120	91	3	GT05	Indoor air, Durian	Indoor air, Durian, Day 3	Indoor air, Durian, Day 3	Before ripened	Indoor air, Durian, Before ripened
Blue	-12.2004	-66.2484	-67.2736	28.66	37.26	50.23	GT05_20250418_162159	1744968120	92	3	GT05	Indoor air, Durian	Indoor air, Durian, Day 3	Indoor air, Durian, Day 3	Before ripened	Indoor air, Durian, Before ripened
Blue	-12.881	-64.8712	-64.8577	23.2611	37.26	50.13	GT05_20250418_162159	1744968120	93	3	GT05	Indoor air, Durian	Indoor air, Durian, Day 3	Indoor air, Durian, Day 3	Before ripened	Indoor air, Durian, Before ripened
Blue	-11.7328	-60.1191	-60.0673	21.4125	37.24	50.03	GT05_20250418_162159	1744968120	94	3	GT05	Indoor air, Durian	Indoor air, Durian, Day 3	Indoor air, Durian, Day 3	Before ripened	Indoor air, Durian, Before ripened
Blue	-10.9041	-57.744	-58.6928	19.9628	37.22	50.03	GT05_20250418_162159	1744968120	95	3	GT05	Indoor air, Durian	Indoor air, Durian, Day 3	Indoor air, Durian, Day 3	Before ripened	Indoor air, Durian, Before ripened
Blue	-11.542	-60.5956	-61.5712	18.2669	37.23	50.1	GT05_20250418_162159	1744968120	96	3	GT05	Indoor air, Durian	Indoor air, Durian, Day 3	Indoor air, Durian, Day 3	Before ripened	Indoor air, Durian, Before ripened
Blue	-10.3432	-55.6099	-56.622	19.3767	37.17	50.19	GT05_20250418_162159	1744968120	97	3	GT05	Indoor air, Durian	Indoor air, Durian, Day 3	Indoor air, Durian, Day 3	Before ripened	Indoor air, Durian, Before ripened
Blue	-10.5357	-58.939	-60.0249	18.5097	37.16	50.38	GT05_20250418_162159	1744968120	98	3	GT05	Indoor air, Durian	Indoor air, Durian, Day 3	Indoor air, Durian, Day 3	Before ripened	Indoor air, Durian, Before ripened
Blue	-10.3457	-61.3183	-62.4822	18.8578	37.14	50.58	GT05_20250418_162159	1744968120	99	3	GT05	Indoor air, Durian	Indoor air, Durian, Day 3	Indoor air, Durian, Day 3	Before ripened	Indoor air, Durian, Before ripened
Blue	-9.23116	-61.6094	-61.8403	21.9364	37.1	50.75	GT05_20250418_162159	1744968120	100	3	GT05	Indoor air, Durian	Indoor air, Durian, Day 3	Indoor air, Durian, Day 3	Before ripened	Indoor air, Durian, Before ripened
Blue	-15.2537	-58.5985	-56.9331	37.16	37.12	51.37	GT05_20250419_103706	1745033826	71	4	GT05	Indoor air, Durian	Indoor air, Durian, Day 4	Indoor air, Durian, Day 4-5	Before ripened	Indoor air, Durian, Before ripened
Blue	-14.904	-59.7892	-58.1824	36.8086	37.1	51.52	GT05_20250419_103706	1745033826	72	4	GT05	Indoor air, Durian	Indoor air, Durian, Day 4	Indoor air, Durian, Day 4-5	Before ripened	Indoor air, Durian, Before ripened
Blue	-13.8844	-57.8906	-56.3118	37.2133	37.07	51.59	GT05_20250419_103706	1745033826	73	4	GT05	Indoor air, Durian	Indoor air, Durian, Day 4	Indoor air, Durian, Day 4-5	Before ripened	Indoor air, Durian, Before ripened
Blue	-14.2677	-60.7432	-59.2109	38.4919	37.07	51.71	GT05_20250419_103706	1745033826	74	4	GT05	Indoor air, Durian	Indoor air, Durian, Day 4	Indoor air, Durian, Day 4-5	Before ripened	Indoor air, Durian, Before ripened
Blue	-14.7788	-64.5467	-63.0763	39.5302	37.07	51.87	GT05_20250419_103706	1745033826	75	4	GT05	Indoor air, Durian	Indoor air, Durian, Day 4	Indoor air, Durian, Day 4-5	Before ripened	Indoor air, Durian, Before ripened
Blue	-14.1105	-66.263	-63.8632	41.2736	37.04	52.05	GT05_20250419_103706	1745033826	76	4	GT05	Indoor air, Durian	Indoor air, Durian, Day 4	Indoor air, Durian, Day 4-5	Before ripened	Indoor air, Durian, Before ripened
Blue	-13.9845	-68.1177	-66.8037	44.5014	37.02	52.27	GT05_20250419_103706	1745033826	77	4	GT05	Indoor air, Durian	Indoor air, Durian, Day 4	Indoor air, Durian, Day 4-5	Before ripened	Indoor air, Durian, Before ripened
Blue	-13.4316	-71.4457	-70.1859	49.6599	37.02	52.41	GT05_20250419_103706	1745033826	78	4	GT05	Indoor air, Durian	Indoor air, Durian, Day 4	Indoor air, Durian, Day 4-5	Before ripened	Indoor air, Durian, Before ripened
Blue	-13.0181	-73.161	-70.9521	52.4287	37	52.54	GT05_20250419_103706	1745033826	79	4	GT05	Indoor air, Durian	Indoor air, Durian, Day 4	Indoor air, Durian, Day 4-5	Before ripened	Indoor air, Durian, Before ripened
Blue	-12.0828	-74.5392	-73.3887	56.8022	36.99	52.69	GT05_20250419_103706	1745033826	80	4	GT05	Indoor air, Durian	Indoor air, Durian, Day 4	Indoor air, Durian, Day 4-5	Before ripened	Indoor air, Durian, Before ripened
Blue	-12.0517	-76.2043	-75.1005	60.356	36.98	52.81	GT05_20250419_103706	1745033826	81	4	GT05	Indoor air, Durian	Indoor air, Durian, Day 4	Indoor air, Durian, Day 4-5	Before ripened	Indoor air, Durian, Before ripened
Blue	-10.2673	-72.4061	-71.3386	64.1907	36.93	52.9	GT05_20250419_103706	1745033826	82	4	GT05	Indoor air, Durian	Indoor air, Durian, Day 4	Indoor air, Durian, Day 4-5	Before ripened	Indoor air, Durian, Before ripened
Blue	-9.30987	-67.1775	-66.0443	65.4877	36.92	52.73	GT05_20250419_103706	1745033826	83	4	GT05	Indoor air, Durian	Indoor air, Durian, Day 4	Indoor air, Durian, Day 4-5	Before ripened	Indoor air, Durian, Before ripened
Blue	-9.79796	-61.4712	-60.2254	66.9558	36.93	52.44	GT05_20250419_103706	1745033826	84	4	GT05	Indoor air, Durian	Indoor air, Durian, Day 4	Indoor air, Durian, Day 4-5	Before ripened	Indoor air, Durian, Before ripened
Blue	-7.24605	-50.0652	-48.7119	57.7394	36.89	52.16	GT05_20250419_103706	1745033826	85	4	GT05	Indoor air, Durian	Indoor air, Durian, Day 4	Indoor air, Durian, Day 4-5	Before ripened	Indoor air, Durian, Before ripened
Blue	-7.70305	-47.024	-45.6049	48.7612	36.89	51.99	GT05_20250419_103706	1745033826	86	4	GT05	Indoor air, Durian	Indoor air, Durian, Day 4	Indoor air, Durian, Day 4-5	Before ripened	Indoor air, Durian, Before ripened
Blue	-8.38364	-45.6469	-43.189	40.3623	36.89	51.89	GT05_20250419_103706	1745033826	87	4	GT05	Indoor air, Durian	Indoor air, Durian, Day 4	Indoor air, Durian, Day 4-5	Before ripened	Indoor air, Durian, Before ripened
Blue	-7.88494	-40.1826	-38.6945	38.6686	36.86	51.81	GT05_20250419_103706	1745033826	88	4	GT05	Indoor air, Durian	Indoor air, Durian, Day 4	Indoor air, Durian, Day 4-5	Before ripened	Indoor air, Durian, Before ripened
Blue	-7.91688	-40.4203	-38.9361	34.6085	36.86	51.82	GT05_20250419_103706	1745033826	89	4	GT05	Indoor air, Durian	Indoor air, Durian, Day 4	Indoor air, Durian, Day 4-5	Before ripened	Indoor air, Durian, Before ripened
Blue	-7.08895	-40.9481	-39.515	34.6525	36.83	51.95	GT05_20250419_103706	1745033826	90	4	GT05	Indoor air, Durian	Indoor air, Durian, Day 4	Indoor air, Durian, Day 4-5	Before ripened	Indoor air, Durian, Before ripened
Blue	-6.89899	-43.3273	-41.9723	34.0006	36.81	52.15	GT05_20250419_103706	1745033826	91	4	GT05	Indoor air, Durian	Indoor air, Durian, Day 4	Indoor air, Durian, Day 4-5	Before ripened	Indoor air, Durian, Before ripened
Blue	-8.30271	-49.9812	-48.6954	37.3683	36.83	52.33	GT05_20250419_103706	1745033826	92	4	GT05	Indoor air, Durian	Indoor air, Durian, Day 4	Indoor air, Durian, Day 4-5	Before ripened	Indoor air, Durian, Before ripened
Blue	-6.25204	-49.7478	-48.5366	40.3267	36.79	52.52	GT05_20250419_103706	1745033826	93	4	GT05	Indoor air, Durian	Indoor air, Durian, Day 4	Indoor air, Durian, Day 4-5	Before ripened	Indoor air, Durian, Before ripened
Blue	-5.51993	-49.9887	-48.8403	44.1904	36.76	52.68	GT05_20250419_103706	1745033826	94	4	GT05	Indoor air, Durian	Indoor air, Durian, Day 4	Indoor air, Durian, Day 4-5	Before ripened	Indoor air, Durian, Before ripened
Blue	-5.83934	-52.3658	-51.2562	47.5893	36.76	52.78	GT05_20250419_103706	1745033826	95	4	GT05	Indoor air, Durian	Indoor air, Durian, Day 4	Indoor air, Durian, Day 4-5	Before ripened	Indoor air, Durian, Before ripened
Blue	-7.40277	-60.2083	-59.1873	49.6565	36.78	53.01	GT05_20250419_103706	1745033826	96	4	GT05	Indoor air, Durian	Indoor air, Durian, Day 4	Indoor air, Durian, Day 4-5	Before ripened	Indoor air, Durian, Before ripened
Blue	-5.09656	-58.0731	-57.0958	54.0958	36.74	53.12	GT05_20250419_103706	1745033826	97	4	GT05	Indoor air, Durian	Indoor air, Durian, Day 4	Indoor air, Durian, Day 4-5	Before ripened	Indoor air, Durian, Before ripened
Blue	-4.65108	-58.5507	-57.6203	57.9247	36.72	53.24	GT05_20250419_103706	1745033826	98	4	GT05	Indoor air, Durian	Indoor air, Durian, Day 4	Indoor air, Durian, Day 4-5	Before ripened	Indoor air, Durian, Before ripened
Blue	-2.99352	-53.8006	-52.8713	59.0253	36.68	53.24	GT05_20250419_103706	1745033826	99	4	GT05	Indoor air, Durian	Indoor air, Durian, Day 4	Indoor air, Durian, Day 4-5	Before ripened	Indoor air, Durian, Before ripened
Blue	-3.439	-53.3231	-52.3467	59.1963	36.7	53.12	GT05_20250419_103706	1745033826	100	4	GT05	Indoor air, Durian	Indoor air, Durian, Day 4	Indoor air, Durian, Day 4-5	Before ripened	Indoor air, Durian, Before ripened
Blue	-14.2757	-77.8422	-77.5132	52.105	36.99	53.71	GT05_20250420_104351	1745120632	71	5	GT05	Indoor air, Durian	Indoor air, Durian, Day 5	Indoor air, Durian, Day 4-5	Before ripened	Indoor air, Durian, Before ripened
Blue	-12.1407	-74.332	-73.0472	54.0946	36.93	53.82	GT05_20250420_104351	1745120632	72	5	GT05	Indoor air, Durian	Indoor air, Durian, Day 5	Indoor air, Durian, Day 4-5	Before ripened	Indoor air, Durian, Before ripened
Blue	-11.918	-74.5708	-73.3094	56.0091	36.92	53.88	GT05_20250420_104351	1745120632	73	5	GT05	Indoor air, Durian	Indoor air, Durian, Day 5	Indoor air, Durian, Day 4-5	Before ripened	Indoor air, Durian, Before ripened
Blue	-12.2055	-76.7102	-75.4838	55.4681	36.92	53.97	GT05_20250420_104351	1745120632	74	5	GT05	Indoor air, Durian	Indoor air, Durian, Day 5	Indoor air, Durian, Day 4-5	Before ripened	Indoor air, Durian, Before ripened
Blue	-11.5053	-76.1888	-76.029	56.2716	36.89	54.14	GT05_20250420_104351	1745120632	75	5	GT05	Indoor air, Durian	Indoor air, Durian, Day 5	Indoor air, Durian, Day 4-5	Before ripened	Indoor air, Durian, Before ripened
Blue	-11.3668	-80.7044	-80.5985	60.155	36.9	54.28	GT05_20250420_104351	1745120632	76	5	GT05	Indoor air, Durian	Indoor air, Durian, Day 5	Indoor air, Durian, Day 4-5	Before ripened	Indoor air, Durian, Before ripened
Blue	-11.3677	-82.6071	-82.552	63.6487	36.89	54.41	GT05_20250420_104351	1745120632	77	5	GT05	Indoor air, Durian	Indoor air, Durian, Day 5	Indoor air, Durian, Day 4-5	Before ripened	Indoor air, Durian, Before ripened
Blue	-8.96567	-79.7588	-79.7357	70.2683	36.85	54.49	GT05_20250420_104351	1745120632	78	5	GT05	Indoor air, Durian	Indoor air, Durian, Day 5	Indoor air, Durian, Day 4-5	Before ripened	Indoor air, Durian, Before ripened
Blue	-8.32853	-78.8101	-77.8107	73.4579	36.83	54.55	GT05_20250420_104351	1745120632	79	5	GT05	Indoor air, Durian	Indoor air, Durian, Day 5	Indoor air, Durian, Day 4-5	Before ripened	Indoor air, Durian, Before ripened
Blue	-8.20077	-78.8592	-76.8443	73.6984	36.83	54.51	GT05_20250420_104351	1745120632	80	5	GT05	Indoor air, Durian	Indoor air, Durian, Day 5	Indoor air, Durian, Day 4-5	Before ripened	Indoor air, Durian, Before ripened
Blue	-6.73317	-71.7299	-69.638	75.4508	36.81	54.31	GT05_20250420_104351	1745120632	81	5	GT05	Indoor air, Durian	Indoor air, Durian, Day 5	Indoor air, Durian, Day 4-5	Before ripened	Indoor air, Durian, Before ripened
Blue	-7.70038	-69.5894	-67.443	70.0172	36.82	54.17	GT05_20250420_104351	1745120632	82	5	GT05	Indoor air, Durian	Indoor air, Durian, Day 5	Indoor air, Durian, Day 4-5	Before ripened	Indoor air, Durian, Before ripened
Blue	-7.59564	-61.5113	-59.3118	62.9593	36.78	54.03	GT05_20250420_104351	1745120632	83	5	GT05	Indoor air, Durian	Indoor air, Durian, Day 5	Indoor air, Durian, Day 4-5	Before ripened	Indoor air, Durian, Before ripened
Blue	-6.83075	-60.6117	-58.4204	57.3894	36.76	54.05	GT05_20250420_104351	1745120632	84	5	GT05	Indoor air, Durian	Indoor air, Durian, Day 5	Indoor air, Durian, Day 4-5	Before ripened	Indoor air, Durian, Before ripened
Blue	-7.11822	-62.7512	-60.5947	55.8484	36.76	54.14	GT05_20250420_104351	1745120632	85	5	GT05	Indoor air, Durian	Indoor air, Durian, Day 5	Indoor air, Durian, Day 4-5	Before ripened	Indoor air, Durian, Before ripened
Blue	-7.43763	-65.1283	-63.0106	55.2473	36.76	54.24	GT05_20250420_104351	1745120632	86	5	GT05	Indoor air, Durian	Indoor air, Durian, Day 5	Indoor air, Durian, Day 4-5	Before ripened	Indoor air, Durian, Before ripened
Blue	-6.9602	-65.3682	-63.2936	55.1363	36.74	54.35	GT05_20250420_104351	1745120632	87	5	GT05	Indoor air, Durian	Indoor air, Durian, Day 5	Indoor air, Durian, Day 4-5	Before ripened	Indoor air, Durian, Before ripened
Blue	-6.25919	-63.944	-61.8855	56.4461	36.72	54.39	GT05_20250420_104351	1745120632	88	5	GT05	Indoor air, Durian	Indoor air, Durian, Day 5	Indoor air, Durian, Day 4-5	Before ripened	Indoor air, Durian, Before ripened
Blue	-6.5786	-66.3211	-64.3014	56.845	36.72	54.49	GT05_20250420_104351	1745120632	89	5	GT05	Indoor air, Durian	Indoor air, Durian, Day 5	Indoor air, Durian, Day 4-5	Before ripened	Indoor air, Durian, Before ripened
Blue	-6.10118	-66.561	-64.5844	57.7341	36.7	54.6	GT05_20250420_104351	1745120632	90	5	GT05	Indoor air, Durian	Indoor air, Durian, Day 5	Indoor air, Durian, Day 4-5	Before ripened	Indoor air, Durian, Before ripened
Blue	-4.55987	-66.3254	-64.3842	59.7434	36.68	54.69	GT05_20250420_104351	1745120632	91	5	GT05	Indoor air, Durian	Indoor air, Durian, Day 5	Indoor air, Durian, Day 4-5	Before ripened	Indoor air, Durian, Before ripened
Blue	-3.82776	-66.5663	-64.6879	61.607	36.65	54.85	GT05_20250420_104351	1745120632	92	5	GT05	Indoor air, Durian	Indoor air, Durian, Day 5	Indoor air, Durian, Day 4-5	Before ripened	Indoor air, Durian, Before ripened
Blue	-3.73278	-67.7559	-65.9165	65.281	36.64	54.95	GT05_20250420_104351	1745120632	93	5	GT05	Indoor air, Durian	Indoor air, Durian, Day 5	Indoor air, Durian, Day 4-5	Before ripened	Indoor air, Durian, Before ripened
Blue	-2.70169	-69.421	-67.6283	66.8348	36.63	55.07	GT05_20250420_104351	1745120632	94	5	GT05	Indoor air, Durian	Indoor air, Durian, Day 5	Indoor air, Durian, Day 4-5	Before ripened	Indoor air, Durian, Before ripened
Blue	-2.0965	-68.71	-66.945	68.9643	36.61	55.14	GT05_20250420_104351	1745120632	95	5	GT05	Indoor air, Durian	Indoor air, Durian, Day 5	Indoor air, Durian, Day 4-5	Before ripened	Indoor air, Durian, Before ripened
Blue	-1.80987	-68.4733	-65.7241	69.999	36.6	55.18	GT05_20250420_104351	1745120632	96	5	GT05	Indoor air, Durian	Indoor air, Durian, Day 5	Indoor air, Durian, Day 4-5	Before ripened	Indoor air, Durian, Before ripened
Blue	-1.50282	-64.4354	-62.6791	70.9447	36.57	55.16	GT05_20250420_104351	1745120632	97	5	GT05	Indoor air, Durian	Indoor air, Durian, Day 5	Indoor air, Durian, Day 4-5	Before ripened	Indoor air, Durian, Before ripened
Blue	0.28335	-56.8317	-55.0103	72.7919	36.54	54.99	GT05_20250420_104351	1745120632	98	5	GT05	Indoor air, Durian	Indoor air, Durian, Day 5	Indoor air, Durian, Day 4-5	Before ripened	Indoor air, Durian, Before ripened
Blue	0.954115	-51.8396	-49.937	71.0542	36.54	54.78	GT05_20250420_104351	1745120632	99	5	GT05	Indoor air, Durian	Indoor air, Durian, Day 5	Indoor air, Durian, Day 4-5	Before ripened	Indoor air, Durian, Before ripened
Blue	1.07037	-48.3252	-45.3881	63.1455	36.52	54.69	GT05_20250420_104351	1745120632	100	5	GT05	Indoor air, Durian	Indoor air, Durian, Day 5	Indoor air, Durian, Day 4-5	Before ripened	Indoor air, Durian, Before ripened
Blue	1.02861	-30.602	-27.7809	94.9261	37.73	50.32	GT05_20250421_094001	1.7452e+09	71	6	GT05	Indoor air, Durian	Indoor air, Durian, Day 6	Indoor air, Durian, Day 6-7	Ripened	Indoor air, Durian, Ripened
Blue	1.92127	-27.7515	-24.9232	95.5966	37.71	50.3	GT05_20250421_094001	1.7452e+09	72	6	GT05	Indoor air, Durian	Indoor air, Durian, Day 6	Indoor air, Durian, Day 6-7	Ripened	Indoor air, Durian, Ripened
Blue	2.52816	-23.235	-20.333	96.7387	37.71	50.11	GT05_20250421_094001	1.7452e+09	73	6	GT05	Indoor air, Durian	Indoor air, Durian, Day 6	Indoor air, Durian, Day 6-7	Ripened	Indoor air, Durian, Ripened
Blue	4.37821	-15.1558	-13.181	97.7062	37.68	49.92	GT05_20250421_094001	1.7452e+09	74	6	GT05	Indoor air, Durian	Indoor air, Durian, Day 6	Indoor air, Durian, Day 6-7	Ripened	Indoor air, Durian, Ripened
Blue	2.50682	-13.3022	-10.2612	88.4529	37.69	49.75	GT05_20250421_094001	1.7452e+09	75	6	GT05	Indoor air, Durian	Indoor air, Durian, Day 6	Indoor air, Durian, Day 6-7	Ripened	Indoor air, Durian, Ripened
Blue	2.84581	-9.02651	-5.9747	81.4587	37.66	49.72	GT05_20250421_094001	1.7452e+09	76	6	GT05	Indoor air, Durian	Indoor air, Durian, Day 6	Indoor air, Durian, Day 6-7	Ripened	Indoor air, Durian, Ripened
Blue	2.06855	-9.26529	-6.23698	76.3731	37.65	49.78	GT05_20250421_094001	1.7452e+09	77	6	GT05	Indoor air, Durian	Indoor air, Durian, Day 6	Indoor air, Durian, Day 6-7	Ripened	Indoor air, Durian, Ripened
Blue	1.46252	-11.8791	-9.87378	75.7373	37.66	49.84	GT05_20250421_094001	1.7452e+09	78	6	GT05	Indoor air, Durian	Indoor air, Durian, Day 6	Indoor air, Durian, Day 6-7	Ripened	Indoor air, Durian, Ripened
Blue	2.80066	-9.50619	-6.54067	76.2368	37.62	49.94	GT05_20250421_094001	1.7452e+09	79	6	GT05	Indoor air, Durian	Indoor air, Durian, Day 6	Indoor air, Durian, Day 6-7	Ripened	Indoor air, Durian, Ripened
Blue	2.76788	-11.6467	-9.73568	77.6704	37.61	50.08	GT05_20250421_094001	1.7452e+09	80	6	GT05	Indoor air, Durian	Indoor air, Durian, Day 6	Indoor air, Durian, Day 6-7	Ripened	Indoor air, Durian, Ripened
Blue	3.35264	-14.737	-12.8763	80.8889	37.61	50.21	GT05_20250421_094001	1.7452e+09	81	6	GT05	Indoor air, Durian	Indoor air, Durian, Day 6	Indoor air, Durian, Day 6-7	Ripened	Indoor air, Durian, Ripened
Blue	4.69079	-12.3641	-10.5432	83.3884	37.57	50.31	GT05_20250421_094001	1.7452e+09	82	6	GT05	Indoor air, Durian	Indoor air, Durian, Day 6	Indoor air, Durian, Day 6-7	Ripened	Indoor air, Durian, Ripened
Blue	3.8931	-16.4042	-14.6296	84.3919	37.58	50.43	GT05_20250421_094001	1.7452e+09	83	6	GT05	Indoor air, Durian	Indoor air, Durian, Day 6	Indoor air, Durian, Day 6-7	Ripened	Indoor air, Durian, Ripened
Blue	5.32707	-13.3181	-11.5717	88.0717	37.54	50.5	GT05_20250421_094001	1.7452e+09	84	6	GT05	Indoor air, Durian	Indoor air, Durian, Day 6	Indoor air, Durian, Day 6-7	Ripened	Indoor air, Durian, Ripened
Blue	5.68909	-16.1696	-14.4501	88.3758	37.55	50.57	GT05_20250421_094001	1.7452e+09	85	6	GT05	Indoor air, Durian	Indoor air, Durian, Day 6	Indoor air, Durian, Day 6-7	Ripened	Indoor air, Durian, Ripened
Blue	6.96336	-14.2722	-12.6001	92.755	37.51	50.69	GT05_20250421_094001	1.7452e+09	86	6	GT05	Indoor air, Durian	Indoor air, Durian, Day 6	Indoor air, Durian, Day 6-7	Ripened	Indoor air, Durian, Ripened
Blue	5.67589	-16.4116	-14.7745	92.214	37.51	50.78	GT05_20250421_094001	1.7452e+09	87	6	GT05	Indoor air, Durian	Indoor air, Durian, Day 6	Indoor air, Durian, Day 6-7	Ripened	Indoor air, Durian, Ripened
Blue	7.98209	-14.2764	-11.6829	94.6533	37.47	50.89	GT05_20250421_094001	1.7452e+09	88	6	GT05	Indoor air, Durian	Indoor air, Durian, Day 6	Indoor air, Durian, Day 6-7	Ripened	Indoor air, Durian, Ripened
Blue	7.43994	-16.4148	-13.8365	94.1377	37.48	50.93	GT05_20250421_094001	1.7452e+09	89	6	GT05	Indoor air, Durian	Indoor air, Durian, Day 6	Indoor air, Durian, Day 6-7	Ripened	Indoor air, Durian, Ripened
Blue	8.38581	-7.62253	-4.95981	96.2856	37.45	50.71	GT05_20250421_094001	1.7452e+09	90	6	GT05	Indoor air, Durian	Indoor air, Durian, Day 6	Indoor air, Durian, Day 6-7	Ripened	Indoor air, Durian, Ripened
Blue	9.40708	-1.91843	0.817653	97.7028	37.44	50.52	GT05_20250421_094001	1.7452e+09	91	6	GT05	Indoor air, Durian	Indoor air, Durian, Day 6	Indoor air, Durian, Day 6-7	Ripened	Indoor air, Durian, Ripened
Blue	9.81081	4.73547	6.54078	88.335	37.42	50.34	GT05_20250421_094001	1.7452e+09	92	6	GT05	Indoor air, Durian	Indoor air, Durian, Day 6	Indoor air, Durian, Day 6-7	Ripened	Indoor air, Durian, Ripened
Blue	10.8632	7.7745	10.6064	85.3061	37.4	50.27	GT05_20250421_094001	1.7452e+09	93	6	GT05	Indoor air, Durian	Indoor air, Durian, Day 6	Indoor air, Durian, Day 6-7	Ripened	Indoor air, Durian, Ripened
Blue	9.86317	7.7745	10.6064	80.3061	37.4	50.27	GT05_20250421_094001	1.7452e+09	94	6	GT05	Indoor air, Durian	Indoor air, Durian, Day 6	Indoor air, Durian, Day 6-7	Ripened	Indoor air, Durian, Ripened
Blue	10.5961	8.43638	11.2561	79.676	37.38	50.3	GT05_20250421_094001	1.7452e+09	95	6	GT05	Indoor air, Durian	Indoor air, Durian, Day 6	Indoor air, Durian, Day 6-7	Ripened	Indoor air, Durian, Ripened
Blue	9.86148	2.96893	6.69958	78.2935	37.38	50.53	GT05_20250421_094001	1.7452e+09	96	6	GT05	Indoor air, Durian	Indoor air, Durian, Day 6	Indoor air, Durian, Day 6-7	Ripened	Indoor air, Durian, Ripened
Blue	10.6255	2.96575	6.63748	78.2172	37.35	50.68	GT05_20250421_094001	1.7452e+09	97	6	GT05	Indoor air, Durian	Indoor air, Durian, Day 6	Indoor air, Durian, Day 6-7	Ripened	Indoor air, Durian, Ripened
Blue	10.9228	-2.26398	1.3225	83.8948	37.35	50.9	GT05_20250421_094001	1.7452e+09	98	6	GT05	Indoor air, Durian	Indoor air, Durian, Day 6	Indoor air, Durian, Day 6-7	Ripened	Indoor air, Durian, Ripened
Blue	12.3249	0.584349	4.13879	89.5144	37.31	50.98	GT05_20250421_094001	1.7452e+09	99	6	GT05	Indoor air, Durian	Indoor air, Durian, Day 6	Indoor air, Durian, Day 6-7	Ripened	Indoor air, Durian, Ripened
Blue	12.1332	0.158059	2.68925	90.1538	37.31	51.04	GT05_20250421_094001	1.7452e+09	100	6	GT05	Indoor air, Durian	Indoor air, Durian, Day 6	Indoor air, Durian, Day 6-7	Ripened	Indoor air, Durian, Ripened
Blue	6.53076	-32.1635	-29.3219	94.1261	37.94	50.45	GT05_20250422_090412	1.74529e+09	71	7	GT05	Indoor air, Durian	Indoor air, Durian, Day 7	Indoor air, Durian, Day 6-7	Ripened	Indoor air, Durian, Ripened
Blue	6.84933	-31.6891	-28.8594	97.2209	37.93	50.48	GT05_20250422_090412	1.74529e+09	72	7	GT05	Indoor air, Durian	Indoor air, Durian, Day 7	Indoor air, Durian, Day 6-7	Ripened	Indoor air, Durian, Ripened
Blue	7.45536	-29.0753	-26.2227	97.8567	37.92	50.42	GT05_20250422_090412	1.74529e+09	73	7	GT05	Indoor air, Durian	Indoor air, Durian, Day 7	Indoor air, Durian, Day 6-7	Ripened	Indoor air, Durian, Ripened
Blue	9.11461	-20.5197	-17.5668	99.9699	37.9	50.16	GT05_20250422_090412	1.74529e+09	74	7	GT05	Indoor air, Durian	Indoor air, Durian, Day 7	Indoor air, Durian, Day 6-7	Ripened	Indoor air, Durian, Ripened
Blue	10.1039	-15.0533	-13.0309	90.327	37.89	49.98	GT05_20250422_090412	1.74529e+09	75	7	GT05	Indoor air, Durian	Indoor air, Durian, Day 7	Indoor air, Durian, Day 6-7	Ripened	Indoor air, Durian, Ripened
Blue	8.73041	-8.63819	-6.57009	82.8737	37.86	49.86	GT05_20250422_090412	1.74529e+09	76	7	GT05	Indoor air, Durian	Indoor air, Durian, Day 7	Indoor air, Durian, Day 6-7	Ripened	Indoor air, Durian, Ripened
Blue	7.89011	-7.44962	-5.36214	78.1743	37.86	49.81	GT05_20250422_090412	1.74529e+09	77	7	GT05	Indoor air, Durian	Indoor air, Durian, Day 7	Indoor air, Durian, Day 6-7	Ripened	Indoor air, Durian, Ripened
Blue	8.22911	-4.17393	-1.07562	74.18	37.83	49.78	GT05_20250422_090412	1.74529e+09	78	7	GT05	Indoor air, Durian	Indoor air, Durian, Day 7	Indoor air, Durian, Day 6-7	Ripened	Indoor air, Durian, Ripened
Blue	8.41991	-4.65043	-2.57949	74.0344	37.82	49.85	GT05_20250422_090412	1.74529e+09	79	7	GT05	Indoor air, Durian	Indoor air, Durian, Day 7	Indoor air, Durian, Day 6-7	Ripened	Indoor air, Durian, Ripened
Blue	8.76957	-5.84112	-3.82884	73.683	37.8	50	GT05_20250422_090412	1.74529e+09	80	7	GT05	Indoor air, Durian	Indoor air, Durian, Day 7	Indoor air, Durian, Day 6-7	Ripened	Indoor air, Durian, Ripened
Blue	8.57707	-9.1702	-7.2318	72.816	37.79	50.19	GT05_20250422_090412	1.74529e+09	81	7	GT05	Indoor air, Durian	Indoor air, Durian, Day 7	Indoor air, Durian, Day 6-7	Ripened	Indoor air, Durian, Ripened
Blue	9.85134	-7.27273	-4.38187	77.1952	37.75	50.31	GT05_20250422_090412	1.74529e+09	82	7	GT05	Indoor air, Durian	Indoor air, Durian, Day 7	Indoor air, Durian, Day 6-7	Ripened	Indoor air, Durian, Ripened
Blue	8.86201	-12.7391	-9.91774	79.8381	37.76	50.49	GT05_20250422_090412	1.74529e+09	83	7	GT05	Indoor air, Durian	Indoor air, Durian, Day 7	Indoor air, Durian, Day 6-7	Ripened	Indoor air, Durian, Ripened
Blue	10.6261	-12.7423	-9.97984	83.7618	37.73	50.64	GT05_20250422_090412	1.74529e+09	84	7	GT05	Indoor air, Durian	Indoor air, Durian, Day 7	Indoor air, Durian, Day 6-7	Ripened	Indoor air, Durian, Ripened
Blue	10.2108	-15.8326	-13.1205	86.9804	37.73	50.77	GT05_20250422_090412	1.74529e+09	85	7	GT05	Indoor air, Durian	Indoor air, Durian, Day 7	Indoor air, Durian, Day 6-7	Ripened	Indoor air, Durian, Ripened
Blue	11.5605	-16.0233	-14.3699	90.629	37.71	50.92	GT05_20250422_090412	1.74529e+09	86	7	GT05	Indoor air, Durian	Indoor air, Durian, Day 7	Indoor air, Durian, Day 6-7	Ripened	Indoor air, Durian, Ripened
Blue	13.0698	-16.0254	-13.4112	94.5782	37.69	51.02	GT05_20250422_090412	1.74529e+09	87	7	GT05	Indoor air, Durian	Indoor air, Durian, Day 7	Indoor air, Durian, Day 6-7	Ripened	Indoor air, Durian, Ripened
Blue	14.2926	-16.2642	-13.6735	97.4927	37.68	51.08	GT05_20250422_090412	1.74529e+09	88	7	GT05	Indoor air, Durian	Indoor air, Durian, Day 7	Indoor air, Durian, Day 6-7	Ripened	Indoor air, Durian, Ripened
Blue	16.3441	-14.1279	-11.5613	100.957	37.65	51.14	GT05_20250422_090412	1.74529e+09	89	7	GT05	Indoor air, Durian	Indoor air, Durian, Day 7	Indoor air, Durian, Day 6-7	Ripened	Indoor air, Durian, Ripened
Blue	16.7593	-11.0376	-8.42065	101.739	37.65	51.01	GT05_20250422_090412	1.74529e+09	90	7	GT05	Indoor air, Durian	Indoor air, Durian, Day 7	Indoor air, Durian, Day 6-7	Ripened	Indoor air, Durian, Ripened
Blue	17.8445	-4.85812	-2.16	103.276	37.64	50.8	GT05_20250422_090412	1.74529e+09	91	7	GT05	Indoor air, Durian	Indoor air, Durian, Day 7	Indoor air, Durian, Day 6-7	Ripened	Indoor air, Durian, Ripened
Blue	18.982	5.36044	7.16627	94.7848	37.61	50.52	GT05_20250422_090412	1.74529e+09	92	7	GT05	Indoor air, Durian	Indoor air, Durian, Day 7	Indoor air, Durian, Day 6-7	Ripened	Indoor air, Durian, Ripened
Blue	17.9075	9.35139	12.219	86.0217	37.6	50.36	GT05_20250422_090412	1.74529e+09	93	7	GT05	Indoor air, Durian	Indoor air, Durian, Day 7	Indoor air, Durian, Day 6-7	Ripened	Indoor air, Durian, Ripened
Blue	16.9279	13.1527	16.043	77.9326	37.58	50.3	GT05_20250422_090412	1.74529e+09	94	7	GT05	Indoor air, Durian	Indoor air, Durian, Day 7	Indoor air, Durian, Day 6-7	Ripened	Indoor air, Durian, Ripened
Blue	15.7043	11.4887	13.3519	74.5118	37.58	50.37	GT05_20250422_090412	1.74529e+09	95	7	GT05	Indoor air, Durian	Indoor air, Durian, Day 7	Indoor air, Durian, Day 6-7	Ripened	Indoor air, Durian, Ripened
Blue	16.7558	13.625	15.4641	74.9766	37.55	50.43	GT05_20250422_090412	1.74529e+09	96	7	GT05	Indoor air, Durian	Indoor air, Durian, Day 7	Indoor air, Durian, Day 6-7	Ripened	Indoor air, Durian, Ripened
Blue	16.2652	12.6228	15.4227	74.9257	37.53	50.53	GT05_20250422_090412	1.74529e+09	97	7	GT05	Indoor air, Durian	Indoor air, Durian, Day 7	Indoor air, Durian, Day 6-7	Ripened	Indoor air, Durian, Ripened
Blue	15.7861	9.0571	11.7989	74.0241	37.53	50.68	GT05_20250422_090412	1.74529e+09	98	7	GT05	Indoor air, Durian	Indoor air, Durian, Day 7	Indoor air, Durian, Day 6-7	Ripened	Indoor air, Durian, Ripened
Blue	16.3389	5.72909	8.41659	73.1825	37.53	50.82	GT05_20250422_090412	1.74529e+09	99	7	GT05	Indoor air, Durian	Indoor air, Durian, Day 7	Indoor air, Durian, Day 6-7	Ripened	Indoor air, Durian, Ripened
Blue	17.6762	6.19921	8.79628	77.1757	37.48	51.05	GT05_20250422_090412	1.74529e+09	100	7	GT05	Indoor air, Durian	Indoor air, Durian, Day 7	Indoor air, Durian, Day 6-7	Ripened	Indoor air, Durian, Ripened
Blue	42.2778	-8.35686	-5.39439	108.164	37.45	50.06	GT05_20250423_100446	1.74538e+09	71	8	GT05	Indoor air, Durian	Indoor air, Durian, Day 8	Indoor air, Durian, Day 8-9	Ripened	Indoor air, Durian, Ripened
Blue	43.2335	-6.93375	-4.00694	108.449	37.42	50.15	GT05_20250423_100446	1.74538e+09	72	8	GT05	Indoor air, Durian	Indoor air, Durian, Day 8	Indoor air, Durian, Day 8-9	Ripened	Indoor air, Durian, Ripened
Blue	43.7428	-5.93588	-4.04834	110.398	37.4	50.25	GT05_20250423_100446	1.74538e+09	73	8	GT05	Indoor air, Durian	Indoor air, Durian, Day 8	Indoor air, Durian, Day 8-9	Ripened	Indoor air, Durian, Ripened
Blue	43.9025	-4.7473	-1.84039	110.698	37.4	50.2	GT05_20250423_100446	1.74538e+09	74	8	GT05	Indoor air, Durian	Indoor air, Durian, Day 8	Indoor air, Durian, Day 8-9	Ripened	Indoor air, Durian, Ripened
Blue	46.0827	1.24259	3.19161	111.91	37.38	50.09	GT05_20250423_100446	1.74538e+09	75	8	GT05	Indoor air, Durian	Indoor air, Durian, Day 8	Indoor air, Durian, Day 8-9	Ripened	Indoor air, Durian, Ripened
Blue	46.4021	3.61974	5.60751	110.511	37.38	49.99	GT05_20250423_100446	1.74538e+09	76	8	GT05	Indoor air, Durian	Indoor air, Durian, Day 8	Indoor air, Durian, Day 8-9	Ripened	Indoor air, Durian, Ripened
Blue	47.6133	6.94456	8.92767	108.276	37.35	50	GT05_20250423_100446	1.74538e+09	77	8	GT05	Indoor air, Durian	Indoor air, Durian, Day 8	Indoor air, Durian, Day 8-9	Ripened	Indoor air, Durian, Ripened
Blue	46.7845	4.56954	7.55317	106.726	37.37	50	GT05_20250423_100446	1.74538e+09	78	8	GT05	Indoor air, Durian	Indoor air, Durian, Day 8	Indoor air, Durian, Day 8-9	Ripened	Indoor air, Durian, Ripened
Blue	47.5379	10.0327	13.0269	108.007	37.33	49.97	GT05_20250423_100446	1.74538e+09	79	8	GT05	Indoor air, Durian	Indoor air, Durian, Day 8	Indoor air, Durian, Day 8-9	Ripened	Indoor air, Durian, Ripened
Blue	48.3978	10.7427	13.6896	108.111	37.3	50.09	GT05_20250423_100446	1.74538e+09	80	8	GT05	Indoor air, Durian	Indoor air, Durian, Day 8	Indoor air, Durian, Day 8-9	Ripened	Indoor air, Durian, Ripened
Blue	47.5682	7.46489	9.3617	108.054	37.31	50.22	GT05_20250423_100446	1.74538e+09	81	8	GT05	Indoor air, Durian	Indoor air, Durian, Day 8	Indoor air, Durian, Day 8-9	Ripened	Indoor air, Durian, Ripened
Blue	47.9498	6.5119	9.35395	108.763	37.29	50.36	GT05_20250423_100446	1.74538e+09	82	8	GT05	Indoor air, Durian	Indoor air, Durian, Day 8	Indoor air, Durian, Day 8-9	Ripened	Indoor air, Durian, Ripened
Blue	49.7777	6.98415	10.775	112.807	37.26	50.49	GT05_20250423_100446	1.74538e+09	83	8	GT05	Indoor air, Durian	Indoor air, Durian, Day 8	Indoor air, Durian, Day 8-9	Ripened	Indoor air, Durian, Ripened
Blue	49.6819	6.271	10.0503	112.627	37.26	50.52	GT05_20250423_100446	1.74538e+09	84	8	GT05	Indoor air, Durian	Indoor air, Durian, Day 8	Indoor air, Durian, Day 8-9	Ripened	Indoor air, Durian, Ripened
Blue	50.7334	9.40725	12.1625	113.091	37.23	50.58	GT05_20250423_100446	1.74538e+09	85	8	GT05	Indoor air, Durian	Indoor air, Durian, Day 8	Indoor air, Durian, Day 8-9	Ripened	Indoor air, Durian, Ripened
Blue	51.1158	10.357	13.1081	113.306	37.22	50.59	GT05_20250423_100446	1.74538e+09	86	8	GT05	Indoor air, Durian	Indoor air, Durian, Day 8	Indoor air, Durian, Day 8-9	Ripened	Indoor air, Durian, Ripened
Blue	50.9242	8.93076	11.6586	112.946	37.22	50.65	GT05_20250423_100446	1.74538e+09	87	8	GT05	Indoor air, Durian	Indoor air, Durian, Day 8	Indoor air, Durian, Day 8-9	Ripened	Indoor air, Durian, Ripened
Blue	51.8799	10.3539	13.046	113.23	37.19	50.74	GT05_20250423_100446	1.74538e+09	88	8	GT05	Indoor air, Durian	Indoor air, Durian, Day 8	Indoor air, Durian, Day 8-9	Ripened	Indoor air, Durian, Ripened
Blue	52.6767	12.4912	16.179	113.72	37.17	50.75	GT05_20250423_100446	1.74538e+09	89	8	GT05	Indoor air, Durian	Indoor air, Durian, Day 8	Indoor air, Durian, Day 8-9	Ripened	Indoor air, Durian, Ripened
Blue	53.6005	14.6766	17.3248	113.945	37.14	50.85	GT05_20250423_100446	1.74538e+09	90	8	GT05	Indoor air, Durian	Indoor air, Durian, Day 8	Indoor air, Durian, Day 8-9	Ripened	Indoor air, Durian, Ripened
Blue	54.8126	19.9042	22.5984	115.216	37.12	50.73	GT05_20250423_100446	1.74538e+09	91	8	GT05	Indoor air, Durian	Indoor air, Durian, Day 8	Indoor air, Durian, Day 8-9	Ripened	Indoor air, Durian, Ripened
Blue	56.2163	26.5581	29.3215	115.848	37.1	50.55	GT05_20250423_100446	1.74538e+09	92	8	GT05	Indoor air, Durian	Indoor air, Durian, Day 8	Indoor air, Durian, Day 8-9	Ripened	Indoor air, Durian, Ripened
Blue	54.8347	27.511	31.3293	107.14	37.12	50.41	GT05_20250423_100446	1.74538e+09	93	8	GT05	Indoor air, Durian	Indoor air, Durian, Day 8	Indoor air, Durian, Day 8-9	Ripened	Indoor air, Durian, Ripened
Blue	55.1098	31.3113	34.1326	104.025	37.09	50.4	GT05_20250423_100446	1.74538e+09	94	8	GT05	Indoor air, Durian	Indoor air, Durian, Day 8	Indoor air, Durian, Day 8-9	Ripened	Indoor air, Durian, Ripened
Blue	55.7789	32.4978	35.2992	104.275	37.07	50.45	GT05_20250423_100446	1.74538e+09	95	8	GT05	Indoor air, Durian	Indoor air, Durian, Day 8	Indoor air, Durian, Day 8-9	Ripened	Indoor air, Durian, Ripened
Blue	56.6707	33.4454	36.2035	104.439	37.04	50.56	GT05_20250423_100446	1.74538e+09	96	8	GT05	Indoor air, Durian	Indoor air, Durian, Day 8	Indoor air, Durian, Day 8-9	Ripened	Indoor air, Durian, Ripened
Blue	57.2554	30.3551	33.0628	106.658	37.04	50.69	GT05_20250423_100446	1.74538e+09	97	8	GT05	Indoor air, Durian	Indoor air, Durian, Day 8	Indoor air, Durian, Day 8-9	Ripened	Indoor air, Durian, Ripened
Blue	57.7329	31.1153	32.7798	109.547	37.02	50.8	GT05_20250423_100446	1.74538e+09	98	8	GT05	Indoor air, Durian	Indoor air, Durian, Day 8	Indoor air, Durian, Day 8-9	Ripened	Indoor air, Durian, Ripened
Blue	58.2422	31.1132	32.7384	110.496	37	50.9	GT05_20250423_100446	1.74538e+09	99	8	GT05	Indoor air, Durian	Indoor air, Durian, Day 8	Indoor air, Durian, Day 8-9	Ripened	Indoor air, Durian, Ripened
Blue	58.9228	28.736	31.3225	110.895	37	51	GT05_20250423_100446	1.74538e+09	100	8	GT05	Indoor air, Durian	Indoor air, Durian, Day 8	Indoor air, Durian, Day 8-9	Ripened	Indoor air, Durian, Ripened
Blue	105.791	84.6573	93.2385	132.017	39.3	43.23	GT05_20250424_141058	1.74548e+09	71	9	GT05	Indoor air, Durian	Indoor air, Durian, Day 9	Indoor air, Durian, Day 8-9	After ripened	Indoor air, Durian, After ripened
Blue	106.524	87.3191	94.8882	133.386	39.28	43.26	GT05_20250424_141058	1.74548e+09	72	9	GT05	Indoor air, Durian	Indoor air, Durian, Day 9	Indoor air, Durian, Day 8-9	After ripened	Indoor air, Durian, After ripened
Blue	106.747	88.0804	95.626	135.301	39.27	43.32	GT05_20250424_141058	1.74548e+09	73	9	GT05	Indoor air, Durian	Indoor air, Durian, Day 9	Indoor air, Durian, Day 8-9	After ripened	Indoor air, Durian, After ripened
Blue	106.364	87.1306	94.6803	135.086	39.28	43.31	GT05_20250424_141058	1.74548e+09	74	9	GT05	Indoor air, Durian	Indoor air, Durian, Day 9	Indoor air, Durian, Day 8-9	After ripened	Indoor air, Durian, After ripened
Blue	111.512	90.98	98.5173	138.731	39.25	43.34	GT05_20250424_141058	1.74548e+09	75	9	GT05	Indoor air, Durian	Indoor air, Durian, Day 9	Indoor air, Durian, Day 8-9	After ripened	Indoor air, Durian, After ripened
Blue	115.863	94.5948	104.175	139.392	39.25	43.23	GT05_20250424_141058	1.74548e+09	76	9	GT05	Indoor air, Durian	Indoor air, Durian, Day 9	Indoor air, Durian, Day 8-9	After ripened	Indoor air, Durian, After ripened
Blue	117.29	95.1215	104.733	139.323	39.27	43.15	GT05_20250424_141058	1.74548e+09	77	9	GT05	Indoor air, Durian	Indoor air, Durian, Day 9	Indoor air, Durian, Day 8-9	After ripened	Indoor air, Durian, After ripened
Blue	121.562	110.85	119.525	137.821	39.18	42.98	GT05_20250424_141058	1.74548e+09	78	9	GT05	Indoor air, Durian	Indoor air, Durian, Day 9	Indoor air, Durian, Day 8-9	After ripened	Indoor air, Durian, After ripened
Blue	121.818	113.752	122.458	134.302	39.18	42.9	GT05_20250424_141058	1.74548e+09	79	9	GT05	Indoor air, Durian	Indoor air, Durian, Day 9	Indoor air, Durian, Day 8-9	After ripened	Indoor air, Durian, After ripened
Blue	119.053	112.852	121.567	129.872	39.2	42.88	GT05_20250424_141058	1.74548e+09	80	9	GT05	Indoor air, Durian	Indoor air, Durian, Day 9	Indoor air, Durian, Day 8-9	After ripened	Indoor air, Durian, After ripened
Blue	116.977	114.038	122.713	129.096	39.17	42.98	GT05_20250424_141058	1.74548e+09	81	9	GT05	Indoor air, Durian	Indoor air, Durian, Day 9	Indoor air, Durian, Day 8-9	After ripened	Indoor air, Durian, After ripened
Blue	115.53	110.71	119.33	128.254	39.17	43.12	GT05_20250424_141058	1.74548e+09	82	9	GT05	Indoor air, Durian	Indoor air, Durian, Day 9	Indoor air, Durian, Day 8-9	After ripened	Indoor air, Durian, After ripened
Blue	115.21	109.333	116.914	127.653	39.17	43.22	GT05_20250424_141058	1.74548e+09	83	9	GT05	Indoor air, Durian	Indoor air, Durian, Day 9	Indoor air, Durian, Day 8-9	After ripened	Indoor air, Durian, After ripened
Blue	115.528	107.904	116.423	130.242	39.15	43.38	GT05_20250424_141058	1.74548e+09	84	9	GT05	Indoor air, Durian	Indoor air, Durian, Day 9	Indoor air, Durian, Day 8-9	After ripened	Indoor air, Durian, After ripened
Blue	115.357	111.279	119.798	131.792	39.13	43.38	GT05_20250424_141058	1.74548e+09	85	9	GT05	Indoor air, Durian	Indoor air, Durian, Day 9	Indoor air, Durian, Day 8-9	After ripened	Indoor air, Durian, After ripened
Blue	116.185	111.751	120.219	132.836	39.1	43.51	GT05_20250424_141058	1.74548e+09	86	9	GT05	Indoor air, Durian	Indoor air, Durian, Day 9	Indoor air, Durian, Day 8-9	After ripened	Indoor air, Durian, After ripened
Blue	115.929	110.85	118.286	133.355	39.1	43.59	GT05_20250424_141058	1.74548e+09	87	9	GT05	Indoor air, Durian	Indoor air, Durian, Day 9	Indoor air, Durian, Day 8-9	After ripened	Indoor air, Durian, After ripened
Blue	115.972	105.621	113.992	134.058	39.11	43.76	GT05_20250424_141058	1.74548e+09	88	9	GT05	Indoor air, Durian	Indoor air, Durian, Day 9	Indoor air, Durian, Day 8-9	After ripened	Indoor air, Durian, After ripened
Blue	117.852	111.132	119.479	136.073	39.06	43.82	GT05_20250424_141058	1.74548e+09	89	9	GT05	Indoor air, Durian	Indoor air, Durian, Day 9	Indoor air, Durian, Day 8-9	After ripened	Indoor air, Durian, After ripened
Blue	118.342	110.232	117.567	138.618	39.07	43.85	GT05_20250424_141058	1.74548e+09	90	9	GT05	Indoor air, Durian	Indoor air, Durian, Day 9	Indoor air, Durian, Day 8-9	After ripened	Indoor air, Durian, After ripened
Blue	118.533	110.755	118.063	139.472	39.06	43.92	GT05_20250424_141058	1.74548e+09	91	9	GT05	Indoor air, Durian	Indoor air, Durian, Day 9	Indoor air, Durian, Day 8-9	After ripened	Indoor air, Durian, After ripened
Blue	121.297	112.655	120.954	139.902	39.04	43.94	GT05_20250424_141058	1.74548e+09	92	9	GT05	Indoor air, Durian	Indoor air, Durian, Day 9	Indoor air, Durian, Day 8-9	After ripened	Indoor air, Durian, After ripened
Blue	124.51	121.785	130.181	141.68	39.03	43.69	GT05_20250424_141058	1.74548e+09	93	9	GT05	Indoor air, Durian	Indoor air, Durian, Day 9	Indoor air, Durian, Day 8-9	After ripened	Indoor air, Durian, After ripened
Blue	125.659	128.44	136.925	143.338	39.02	43.46	GT05_20250424_141058	1.74548e+09	94	9	GT05	Indoor air, Durian	Indoor air, Durian, Day 9	Indoor air, Durian, Day 8-9	After ripened	Indoor air, Durian, After ripened
Blue	127.414	136.806	144.352	136.125	38.99	43.3	GT05_20250424_141058	1.74548e+09	95	9	GT05	Indoor air, Durian	Indoor air, Durian, Day 9	Indoor air, Durian, Day 8-9	After ripened	Indoor air, Durian, After ripened
Blue	124.319	137.996	145.581	131.451	39	43.2	GT05_20250424_141058	1.74548e+09	96	9	GT05	Indoor air, Durian	Indoor air, Durian, Day 9	Indoor air, Durian, Day 8-9	After ripened	Indoor air, Durian, After ripened
Blue	124.594	141.796	149.384	128.336	38.97	43.19	GT05_20250424_141058	1.74548e+09	97	9	GT05	Indoor air, Durian	Indoor air, Durian, Day 9	Indoor air, Durian, Day 8-9	After ripened	Indoor air, Durian, After ripened
Blue	124.434	140.607	148.176	128.036	38.97	43.24	GT05_20250424_141058	1.74548e+09	98	9	GT05	Indoor air, Durian	Indoor air, Durian, Day 9	Indoor air, Durian, Day 8-9	After ripened	Indoor air, Durian, After ripened
Blue	124.401	139.467	146.981	127.469	38.96	43.38	GT05_20250424_141058	1.74548e+09	99	9	GT05	Indoor air, Durian	Indoor air, Durian, Day 9	Indoor air, Durian, Day 8-9	After ripened	Indoor air, Durian, After ripened
Blue	125.771	142.078	149.556	130.029	38.92	43.47	GT05_20250424_141058	1.74548e+09	100	9	GT05	Indoor air, Durian	Indoor air, Durian, Day 9	Indoor air, Durian, Day 8-9	After ripened	Indoor air, Durian, After ripened
Blue	-26.0891	-98.8326	-100.784	-32.5721	37.68	49.71	GT06_20250418_161354	1744967634	71	3	GT06	Indoor air, Durian	Indoor air, Durian, Day 3	Indoor air, Durian, Day 3	Before ripened	Indoor air, Durian, Before ripened
Blue	-24.7501	-94.5569	-97.4976	-31.5664	37.65	49.68	GT06_20250418_161354	1744967634	72	3	GT06	Indoor air, Durian	Indoor air, Durian, Day 3	Indoor air, Durian, Day 3	Before ripened	Indoor air, Durian, Before ripened
Blue	-25.3864	-93.6029	-96.4692	-31.2497	37.68	49.49	GT06_20250418_161354	1744967634	73	3	GT06	Indoor air, Durian	Indoor air, Durian, Day 3	Indoor air, Durian, Day 3	Before ripened	Indoor air, Durian, Before ripened
Blue	-24.8549	-85.9981	-88.7797	-30.377	37.66	49.27	GT06_20250418_161354	1744967634	74	3	GT06	Indoor air, Durian	Indoor air, Durian, Day 3	Indoor air, Durian, Day 3	Before ripened	Indoor air, Durian, Before ripened
Blue	-23.6429	-80.7705	-83.5061	-30.1054	37.64	49.15	GT06_20250418_161354	1744967634	75	3	GT06	Indoor air, Durian	Indoor air, Durian, Day 3	Indoor air, Durian, Day 3	Before ripened	Indoor air, Durian, Before ripened
Blue	-22.5905	-77.7315	-80.4405	-29.1344	37.62	49.08	GT06_20250418_161354	1744967634	76	3	GT06	Indoor air, Durian	Indoor air, Durian, Day 3	Indoor air, Durian, Day 3	Before ripened	Indoor air, Durian, Before ripened
Blue	-20.9968	-73.4569	-76.1746	-28.154	37.58	49.1	GT06_20250418_161354	1744967634	77	3	GT06	Indoor air, Durian	Indoor air, Durian, Day 3	Indoor air, Durian, Day 3	Before ripened	Indoor air, Durian, Before ripened
Blue	-21.1246	-74.4077	-77.141	-28.3945	37.58	49.14	GT06_20250418_161354	1744967634	78	3	GT06	Indoor air, Durian	Indoor air, Durian, Day 3	Indoor air, Durian, Day 3	Before ripened	Indoor air, Durian, Before ripened
Blue	-20.1689	-73.9846	-76.7535	-28.1101	37.55	49.23	GT06_20250418_161354	1744967634	79	3	GT06	Indoor air, Durian	Indoor air, Durian, Day 3	Indoor air, Durian, Day 3	Before ripened	Indoor air, Durian, Before ripened
Blue	-19.7553	-74.6999	-77.5197	-28.3412	37.53	49.36	GT06_20250418_161354	1744967634	80	3	GT06	Indoor air, Durian	Indoor air, Durian, Day 3	Indoor air, Durian, Day 3	Before ripened	Indoor air, Durian, Before ripened
Blue	-21.0632	-80.6407	-83.5181	-29.7932	37.55	49.51	GT06_20250418_161354	1744967634	81	3	GT06	Indoor air, Durian	Indoor air, Durian, Day 3	Indoor air, Durian, Day 3	Before ripened	Indoor air, Durian, Before ripened
Blue	-19.088	-77.319	-81.26	-29.1041	37.49	49.67	GT06_20250418_161354	1744967634	82	3	GT06	Indoor air, Durian	Indoor air, Durian, Day 3	Indoor air, Durian, Day 3	Before ripened	Indoor air, Durian, Before ripened
Blue	-19.5032	-80.4093	-84.4007	-28.8856	37.49	49.8	GT06_20250418_161354	1744967634	83	3	GT06	Indoor air, Durian	Indoor air, Durian, Day 3	Indoor air, Durian, Day 3	Before ripened	Indoor air, Durian, Before ripened
Blue	-19.5041	-82.3121	-86.3541	-29.3919	37.48	49.93	GT06_20250418_161354	1744967634	84	3	GT06	Indoor air, Durian	Indoor air, Durian, Day 3	Indoor air, Durian, Day 3	Before ripened	Indoor air, Durian, Before ripened
Blue	-18.6761	-81.8399	-84.933	-29.3479	37.45	50.06	GT06_20250418_161354	1744967634	85	3	GT06	Indoor air, Durian	Indoor air, Durian, Day 3	Indoor air, Durian, Day 3	Before ripened	Indoor air, Durian, Before ripened
Blue	-18.4214	-82.8409	-85.9537	-29.3733	37.44	50.11	GT06_20250418_161354	1744967634	86	3	GT06	Indoor air, Durian	Indoor air, Durian, Day 3	Indoor air, Durian, Day 3	Before ripened	Indoor air, Durian, Before ripened
Blue	-18.7728	-85.4558	-88.6112	-30.0345	37.44	50.22	GT06_20250418_161354	1744967634	87	3	GT06	Indoor air, Durian	Indoor air, Durian, Day 3	Indoor air, Durian, Day 3	Before ripened	Indoor air, Durian, Before ripened
Blue	-18.881	-84.5081	-87.7069	-29.8703	37.41	50.33	GT06_20250418_161354	1744967634	88	3	GT06	Indoor air, Durian	Indoor air, Durian, Day 3	Indoor air, Durian, Day 3	Before ripened	Indoor air, Durian, Before ripened
Blue	-18.7221	-85.2223	-88.4524	-30.0761	37.4	50.41	GT06_20250418_161354	1744967634	89	3	GT06	Indoor air, Durian	Indoor air, Durian, Day 3	Indoor air, Durian, Day 3	Before ripened	Indoor air, Durian, Before ripened
Blue	-17.3184	-78.5684	-82.7293	-28.4438	37.38	50.23	GT06_20250418_161354	1744967634	90	3	GT06	Indoor air, Durian	Indoor air, Durian, Day 3	Indoor air, Durian, Day 3	Before ripened	Indoor air, Durian, Before ripened
Blue	-15.3406	-70.5384	-73.6109	-26.2359	37.35	50	GT06_20250418_161354	1744967634	91	3	GT06	Indoor air, Durian	Indoor air, Durian, Day 3	Indoor air, Durian, Day 3	Before ripened	Indoor air, Durian, Before ripened
Blue	-14.5101	-64.3578	-67.3296	-24.673	37.35	49.74	GT06_20250418_161354	1744967634	92	3	GT06	Indoor air, Durian	Indoor air, Durian, Day 3	Indoor air, Durian, Day 3	Before ripened	Indoor air, Durian, Before ripened
Blue	-13.7763	-60.7932	-64.7264	-24.7968	37.34	49.64	GT06_20250418_161354	1744967634	93	3	GT06	Indoor air, Durian	Indoor air, Durian, Day 3	Indoor air, Durian, Day 3	Before ripened	Indoor air, Durian, Before ripened
Blue	-13.0744	-58.4662	-61.3649	-23.9807	37.33	49.55	GT06_20250418_161354	1744967634	94	3	GT06	Indoor air, Durian	Indoor air, Durian, Day 3	Indoor air, Durian, Day 3	Before ripened	Indoor air, Durian, Before ripened
Blue	-11.6085	-55.1425	-58.0654	-23.2408	37.29	49.61	GT06_20250418_161354	1744967634	95	3	GT06	Indoor air, Durian	Indoor air, Durian, Day 3	Indoor air, Durian, Day 3	Before ripened	Indoor air, Durian, Before ripened
Blue	-12.1835	-59.4213	-62.414	-24.3228	37.29	49.79	GT06_20250418_161354	1744967634	96	3	GT06	Indoor air, Durian	Indoor air, Durian, Day 3	Indoor air, Durian, Day 3	Before ripened	Indoor air, Durian, Before ripened
Blue	-11.4514	-59.6622	-62.7177	-24.4592	37.26	49.95	GT06_20250418_161354	1744967634	97	3	GT06	Indoor air, Durian	Indoor air, Durian, Day 3	Indoor air, Durian, Day 3	Before ripened	Indoor air, Durian, Before ripened
Blue	-13.1221	-64.6543	-67.7911	-25.7215	37.26	50.16	GT06_20250418_161354	1744967634	98	3	GT06	Indoor air, Durian	Indoor air, Durian, Day 3	Indoor air, Durian, Day 3	Before ripened	Indoor air, Durian, Before ripened
Blue	-12.9641	-67.2712	-70.49	-26.4335	37.24	50.37	GT06_20250418_161354	1744967634	99	3	GT06	Indoor air, Durian	Indoor air, Durian, Day 3	Indoor air, Durian, Day 3	Before ripened	Indoor air, Durian, Before ripened
Blue	-12.8372	-68.2232	-71.477	-26.6994	37.23	50.46	GT06_20250418_161354	1744967634	100	3	GT06	Indoor air, Durian	Indoor air, Durian, Day 3	Indoor air, Durian, Day 3	Before ripened	Indoor air, Durian, Before ripened
Blue	-21.1144	-55.5744	-57.7	-14.3189	37.26	50.51	GT06_20250419_104515	1745034315	71	4	GT06	Indoor air, Durian	Indoor air, Durian, Day 4	Indoor air, Durian, Day 4-5	Before ripened	Indoor air, Durian, Before ripened
Blue	-22.0718	-61.803	-62.9943	-15.6159	37.27	50.68	GT06_20250419_104515	1745034315	72	4	GT06	Indoor air, Durian	Indoor air, Durian, Day 4	Indoor air, Durian, Day 4-5	Before ripened	Indoor air, Durian, Before ripened
Blue	-22.1366	-64.1812	-65.4309	-16.2424	37.26	50.83	GT06_20250419_104515	1745034315	73	4	GT06	Indoor air, Durian	Indoor air, Durian, Day 4	Indoor air, Durian, Day 4-5	Before ripened	Indoor air, Durian, Before ripened
Blue	-21.0539	-63.7101	-65.0305	-16.2239	37.22	51.01	GT06_20250419_104515	1745034315	74	4	GT06	Indoor air, Durian	Indoor air, Durian, Day 4	Indoor air, Durian, Day 4-5	Before ripened	Indoor air, Durian, Before ripened
Blue	-20.6723	-64.663	-66.0382	-16.5152	37.2	51.15	GT06_20250419_104515	1745034315	75	4	GT06	Indoor air, Durian	Indoor air, Durian, Day 4	Indoor air, Durian, Day 4-5	Before ripened	Indoor air, Durian, Before ripened
Blue	-21.2153	-68.7042	-70.1453	-17.537	37.2	51.32	GT06_20250419_104515	1745034315	76	4	GT06	Indoor air, Durian	Indoor air, Durian, Day 4	Indoor air, Durian, Day 4-5	Before ripened	Indoor air, Durian, Before ripened
Blue	-21.2162	-70.607	-73.0987	-18.0433	37.19	51.45	GT06_20250419_104515	1745034315	77	4	GT06	Indoor air, Durian	Indoor air, Durian, Day 4	Indoor air, Durian, Day 4-5	Before ripened	Indoor air, Durian, Before ripened
Blue	-20.2605	-70.1839	-71.7112	-16.7589	37.16	51.54	GT06_20250419_104515	1745034315	78	4	GT06	Indoor air, Durian	Indoor air, Durian, Day 4	Indoor air, Durian, Day 4-5	Before ripened	Indoor air, Durian, Before ripened
Blue	-20.516	-72.0856	-73.6439	-17.2398	37.16	51.62	GT06_20250419_104515	1745034315	79	4	GT06	Indoor air, Durian	Indoor air, Durian, Day 4	Indoor air, Durian, Day 4-5	Before ripened	Indoor air, Durian, Before ripened
Blue	-19.8469	-70.8991	-72.4774	-16.9901	37.14	51.67	GT06_20250419_104515	1745034315	80	4	GT06	Indoor air, Durian	Indoor air, Durian, Day 4	Indoor air, Durian, Day 4-5	Before ripened	Indoor air, Durian, Before ripened
Blue	-19.2737	-70.4258	-72.0356	-16.9207	37.12	51.75	GT06_20250419_104515	1745034315	81	4	GT06	Indoor air, Durian	Indoor air, Durian, Day 4	Indoor air, Durian, Day 4-5	Before ripened	Indoor air, Durian, Before ripened
Blue	-19.0501	-69.7618	-71.3445	-16.4999	37.12	51.68	GT06_20250419_104515	1745034315	82	4	GT06	Indoor air, Durian	Indoor air, Durian, Day 4	Indoor air, Durian, Day 4-5	Before ripened	Indoor air, Durian, Before ripened
Blue	-17.0084	-60.2564	-61.743	-14.1718	37.09	51.43	GT06_20250419_104515	1745034315	83	4	GT06	Indoor air, Durian	Indoor air, Durian, Day 4	Indoor air, Durian, Day 4-5	Before ripened	Indoor air, Durian, Before ripened
Blue	-15.445	-52.4139	-53.8119	-12.239	37.07	51.2	GT06_20250419_104515	1745034315	84	4	GT06	Indoor air, Durian	Indoor air, Durian, Day 4	Indoor air, Durian, Day 4-5	Before ripened	Indoor air, Durian, Before ripened
Blue	-14.902	-49.3728	-50.7049	-12.2171	37.07	51.03	GT06_20250419_104515	1745034315	85	4	GT06	Indoor air, Durian	Indoor air, Durian, Day 4	Indoor air, Durian, Day 4-5	Before ripened	Indoor air, Durian, Before ripened
Blue	-13.9569	-42.4833	-43.7815	-10.5756	37.03	50.94	GT06_20250419_104515	1745034315	86	4	GT06	Indoor air, Durian	Indoor air, Durian, Day 4	Indoor air, Durian, Day 4-5	Before ripened	Indoor air, Durian, Before ripened
Blue	-13.7023	-43.4844	-43.8022	-10.601	37.02	50.99	GT06_20250419_104515	1745034315	87	4	GT06	Indoor air, Durian	Indoor air, Durian, Day 4	Indoor air, Durian, Day 4-5	Before ripened	Indoor air, Durian, Before ripened
Blue	-13.9897	-45.6238	-45.9765	-12.142	37.02	51.08	GT06_20250419_104515	1745034315	88	4	GT06	Indoor air, Durian	Indoor air, Durian, Day 4	Indoor air, Durian, Day 4-5	Before ripened	Indoor air, Durian, Before ripened
Blue	-13.672	-47.0522	-48.4675	-12.5535	37	51.24	GT06_20250419_104515	1745034315	89	4	GT06	Indoor air, Durian	Indoor air, Durian, Day 4	Indoor air, Durian, Day 4-5	Before ripened	Indoor air, Durian, Before ripened
Blue	-12.3658	-44.917	-46.376	-12.1142	36.96	51.35	GT06_20250419_104515	1745034315	90	4	GT06	Indoor air, Durian	Indoor air, Durian, Day 4	Indoor air, Durian, Day 4-5	Before ripened	Indoor air, Durian, Before ripened
Blue	-11.6018	-45.9202	-46.4381	-12.1904	36.93	51.5	GT06_20250419_104515	1745034315	91	4	GT06	Indoor air, Durian	Indoor air, Durian, Day 4	Indoor air, Durian, Day 4-5	Before ripened	Indoor air, Durian, Before ripened
Blue	-12.7819	-50.9101	-51.4701	-13.4019	36.95	51.61	GT06_20250419_104515	1745034315	92	4	GT06	Indoor air, Durian	Indoor air, Durian, Day 4	Indoor air, Durian, Day 4-5	Before ripened	Indoor air, Durian, Before ripened
Blue	-12.2086	-50.4368	-51.0283	-12.3325	36.93	51.69	GT06_20250419_104515	1745034315	93	4	GT06	Indoor air, Durian	Indoor air, Durian, Day 4	Indoor air, Durian, Day 4-5	Before ripened	Indoor air, Durian, Before ripened
Blue	-11.6362	-51.8663	-53.5399	-12.7694	36.9	51.9	GT06_20250419_104515	1745034315	94	4	GT06	Indoor air, Durian	Indoor air, Durian, Day 4	Indoor air, Durian, Day 4-5	Before ripened	Indoor air, Durian, Before ripened
Blue	-11.9876	-54.4811	-56.1974	-13.4306	36.9	52.01	GT06_20250419_104515	1745034315	95	4	GT06	Indoor air, Durian	Indoor air, Durian, Day 4	Indoor air, Durian, Day 4-5	Before ripened	Indoor air, Durian, Before ripened
Blue	-10.6494	-52.1082	-53.8643	-12.9312	36.86	52.11	GT06_20250419_104515	1745034315	96	4	GT06	Indoor air, Durian	Indoor air, Durian, Day 4	Indoor air, Durian, Day 4-5	Before ripened	Indoor air, Durian, Before ripened
Blue	-11.8615	-58.3358	-60.1379	-14.2028	36.88	52.23	GT06_20250419_104515	1745034315	97	4	GT06	Indoor air, Durian	Indoor air, Durian, Day 4	Indoor air, Durian, Day 4-5	Before ripened	Indoor air, Durian, Before ripened
Blue	-11.7461	-55.7242	-57.5425	-13.6178	36.85	52.27	GT06_20250419_104515	1745034315	98	4	GT06	Indoor air, Durian	Indoor air, Durian, Day 4	Indoor air, Durian, Day 4-5	Before ripened	Indoor air, Durian, Before ripened
Blue	-10.3424	-49.0703	-50.8193	-11.9856	36.83	52.09	GT06_20250419_104515	1745034315	99	4	GT06	Indoor air, Durian	Indoor air, Durian, Day 4	Indoor air, Durian, Day 4-5	Before ripened	Indoor air, Durian, Before ripened
Blue	-9.7994	-46.0291	-46.7123	-10.9637	36.83	51.92	GT06_20250419_104515	1745034315	100	4	GT06	Indoor air, Durian	Indoor air, Durian, Day 4	Indoor air, Durian, Day 4-5	Before ripened	Indoor air, Durian, Before ripened
Blue	-20.481	-72.8476	-72.1594	23.8838	37.04	52.78	GT06_20250420_105122	1745121082	71	5	GT06	Indoor air, Durian	Indoor air, Durian, Day 5	Indoor air, Durian, Day 4-5	Before ripened	Indoor air, Durian, Before ripened
Blue	-20.8324	-75.4624	-74.8169	23.2226	37.04	52.89	GT06_20250420_105122	1745121082	72	5	GT06	Indoor air, Durian	Indoor air, Durian, Day 5	Indoor air, Durian, Day 4-5	Before ripened	Indoor air, Durian, Before ripened
Blue	-20.4073	-79.7413	-79.1655	24.1406	37.04	53.07	GT06_20250420_105122	1745121082	73	5	GT06	Indoor air, Durian	Indoor air, Durian, Day 5	Indoor air, Durian, Day 4-5	Before ripened	Indoor air, Durian, Before ripened
Blue	-20.0887	-79.2669	-77.703	27.2354	37.03	53.1	GT06_20250420_105122	1745121082	74	5	GT06	Indoor air, Durian	Indoor air, Durian, Day 5	Indoor air, Durian, Day 4-5	Before ripened	Indoor air, Durian, Before ripened
Blue	-19.8341	-79.268	-77.7237	27.21	37.02	53.15	GT06_20250420_105122	1745121082	75	5	GT06	Indoor air, Durian	Indoor air, Durian, Day 5	Indoor air, Durian, Day 4-5	Before ripened	Indoor air, Durian, Before ripened
Blue	-19.2608	-78.7947	-77.282	28.2794	37	53.23	GT06_20250420_105122	1745121082	76	5	GT06	Indoor air, Durian	Indoor air, Durian, Day 5	Indoor air, Durian, Day 4-5	Before ripened	Indoor air, Durian, Before ripened
Blue	-20.0896	-81.1697	-79.6565	27.7291	37.02	53.23	GT06_20250420_105122	1745121082	77	5	GT06	Indoor air, Durian	Indoor air, Durian, Day 5	Indoor air, Durian, Day 4-5	Before ripened	Indoor air, Durian, Before ripened
Blue	-18.8145	-77.3695	-76.8531	28.6147	36.99	53.22	GT06_20250420_105122	1745121082	78	5	GT06	Indoor air, Durian	Indoor air, Durian, Day 5	Indoor air, Durian, Day 4-5	Before ripened	Indoor air, Durian, Before ripened
Blue	-18.7949	-75.4709	-74.9825	29.0193	36.96	53.29	GT06_20250420_105122	1745121082	79	5	GT06	Indoor air, Durian	Indoor air, Durian, Day 5	Indoor air, Durian, Day 4-5	Before ripened	Indoor air, Durian, Before ripened
Blue	-17.6795	-73.8593	-72.3871	29.6042	36.93	53.33	GT06_20250420_105122	1745121082	80	5	GT06	Indoor air, Durian	Indoor air, Durian, Day 5	Indoor air, Durian, Day 4-5	Before ripened	Indoor air, Durian, Before ripened
Blue	-17.5837	-73.1461	-71.6623	29.7846	36.93	53.3	GT06_20250420_105122	1745121082	81	5	GT06	Indoor air, Durian	Indoor air, Durian, Day 5	Indoor air, Durian, Day 4-5	Before ripened	Indoor air, Durian, Before ripened
Blue	-16.3086	-69.3459	-67.859	30.6701	36.9	53.29	GT06_20250420_105122	1745121082	82	5	GT06	Indoor air, Durian	Indoor air, Durian, Day 5	Indoor air, Durian, Day 4-5	Before ripened	Indoor air, Durian, Before ripened
Blue	-16.6067	-66.0189	-64.4974	30.4862	36.89	53.2	GT06_20250420_105122	1745121082	83	5	GT06	Indoor air, Durian	Indoor air, Durian, Day 5	Indoor air, Durian, Day 4-5	Before ripened	Indoor air, Durian, Before ripened
Blue	-16.7025	-66.7321	-65.2222	27.3059	36.89	53.23	GT06_20250420_105122	1745121082	84	5	GT06	Indoor air, Durian	Indoor air, Durian, Day 5	Indoor air, Durian, Day 4-5	Before ripened	Indoor air, Durian, Before ripened
Blue	-15.2358	-61.5055	-60.9693	27.552	36.86	53.16	GT06_20250420_105122	1745121082	85	5	GT06	Indoor air, Durian	Indoor air, Durian, Day 5	Indoor air, Durian, Day 4-5	Before ripened	Indoor air, Durian, Before ripened
Blue	-14.8533	-60.5557	-60.0236	25.7671	36.85	53.17	GT06_20250420_105122	1745121082	86	5	GT06	Indoor air, Durian	Indoor air, Durian, Day 5	Indoor air, Durian, Day 4-5	Before ripened	Indoor air, Durian, Before ripened
Blue	-14.1212	-60.7966	-60.3273	25.6307	36.82	53.33	GT06_20250420_105122	1745121082	87	5	GT06	Indoor air, Durian	Indoor air, Durian, Day 5	Indoor air, Durian, Day 4-5	Before ripened	Indoor air, Durian, Before ripened
Blue	-14.4406	-63.1738	-62.7432	25.0296	36.82	53.43	GT06_20250420_105122	1745121082	88	5	GT06	Indoor air, Durian	Indoor air, Durian, Day 5	Indoor air, Durian, Day 4-5	Before ripened	Indoor air, Durian, Before ripened
Blue	-14.4734	-66.3143	-64.9382	27.4632	36.81	53.57	GT06_20250420_105122	1745121082	89	5	GT06	Indoor air, Durian	Indoor air, Durian, Day 5	Indoor air, Durian, Day 4-5	Before ripened	Indoor air, Durian, Before ripened
Blue	-14.1237	-67.505	-66.1876	28.1118	36.79	53.72	GT06_20250420_105122	1745121082	90	5	GT06	Indoor air, Durian	Indoor air, Durian, Day 5	Indoor air, Durian, Day 4-5	Before ripened	Indoor air, Durian, Before ripened
Blue	-13.3154	-68.9312	-67.6371	30.7511	36.79	53.78	GT06_20250420_105122	1745121082	91	5	GT06	Indoor air, Durian	Indoor air, Durian, Day 5	Indoor air, Durian, Day 4-5	Before ripened	Indoor air, Durian, Before ripened
Blue	-12.4555	-68.2213	-66.9744	32.8552	36.76	53.9	GT06_20250420_105122	1745121082	92	5	GT06	Indoor air, Durian	Indoor air, Durian, Day 5	Indoor air, Durian, Day 4-5	Before ripened	Indoor air, Durian, Before ripened
Blue	-12.3605	-69.4109	-68.2031	33.5293	36.75	54	GT06_20250420_105122	1745121082	93	5	GT06	Indoor air, Durian	Indoor air, Durian, Day 5	Indoor air, Durian, Day 4-5	Before ripened	Indoor air, Durian, Before ripened
Blue	-11.2451	-66.7992	-65.6077	35.1142	36.72	54.04	GT06_20250420_105122	1745121082	94	5	GT06	Indoor air, Durian	Indoor air, Durian, Day 5	Indoor air, Durian, Day 4-5	Before ripened	Indoor air, Durian, Before ripened
Blue	-11.0224	-67.038	-65.87	37.0287	36.71	54.1	GT06_20250420_105122	1745121082	95	5	GT06	Indoor air, Durian	Indoor air, Durian, Day 5	Indoor air, Durian, Day 4-5	Before ripened	Indoor air, Durian, Before ripened
Blue	-10.7358	-66.8014	-65.6491	37.0634	36.7	54.14	GT06_20250420_105122	1745121082	96	5	GT06	Indoor air, Durian	Indoor air, Durian, Day 5	Indoor air, Durian, Day 4-5	Before ripened	Indoor air, Durian, Before ripened
Blue	-9.93893	-64.6641	-63.5162	37.5535	36.68	54.15	GT06_20250420_105122	1745121082	97	5	GT06	Indoor air, Durian	Indoor air, Durian, Day 5	Indoor air, Durian, Day 4-5	Before ripened	Indoor air, Durian, Before ripened
Blue	-9.52454	-64.4765	-62.3289	37.8287	36.67	54.15	GT06_20250420_105122	1745121082	98	5	GT06	Indoor air, Durian	Indoor air, Durian, Day 5	Indoor air, Durian, Day 4-5	Before ripened	Indoor air, Durian, Before ripened
Blue	-9.26901	-62.5748	-60.3962	38.3096	36.67	54.07	GT06_20250420_105122	1745121082	99	5	GT06	Indoor air, Durian	Indoor air, Durian, Day 5	Indoor air, Durian, Day 4-5	Before ripened	Indoor air, Durian, Before ripened
Blue	-9.025	-57.1095	-54.881	36.6413	36.65	53.94	GT06_20250420_105122	1745121082	100	5	GT06	Indoor air, Durian	Indoor air, Durian, Day 5	Indoor air, Durian, Day 4-5	Before ripened	Indoor air, Durian, Before ripened
Blue	14.7084	-21.8819	-13.1502	144.819	37.83	50.37	GT06_20250421_094808	1.7452e+09	71	6	GT06	Indoor air, Durian	Indoor air, Durian, Day 6	Indoor air, Durian, Day 6-7	Ripened	Indoor air, Durian, Ripened
Blue	15.7616	-15.9401	-7.13113	146.296	37.82	50.17	GT06_20250421_094808	1.7452e+09	72	6	GT06	Indoor air, Durian	Indoor air, Durian, Day 6	Indoor air, Durian, Day 6-7	Ripened	Indoor air, Durian, Ripened
Blue	15.2611	-8.57308	0.316765	133.109	37.8	49.96	GT06_20250421_094808	1.7452e+09	73	6	GT06	Indoor air, Durian	Indoor air, Durian, Day 6	Indoor air, Durian, Day 6-7	Ripened	Indoor air, Durian, Ripened
Blue	13.4847	-6.90908	2.00789	120.529	37.8	49.89	GT06_20250421_094808	1.7452e+09	74	6	GT06	Indoor air, Durian	Indoor air, Durian, Day 6	Indoor air, Durian, Day 6-7	Ripened	Indoor air, Durian, Ripened
Blue	13.2177	-5.2472	3.65763	112.899	37.78	49.92	GT06_20250421_094808	1.7452e+09	75	6	GT06	Indoor air, Durian	Indoor air, Durian, Day 6	Indoor air, Durian, Day 6-7	Ripened	Indoor air, Durian, Ripened
Blue	13.2692	-3.11095	4.76985	113.364	37.75	49.98	GT06_20250421_094808	1.7452e+09	76	6	GT06	Indoor air, Durian	Indoor air, Durian, Day 6	Indoor air, Durian, Day 6-7	Ripened	Indoor air, Durian, Ripened
Blue	13.0775	-4.53724	4.32031	113.003	37.75	50.04	GT06_20250421_094808	1.7452e+09	77	6	GT06	Indoor air, Durian	Indoor air, Durian, Day 6	Indoor air, Durian, Day 6-7	Ripened	Indoor air, Durian, Ripened
Blue	13.5869	-4.53936	4.27891	113.953	37.73	50.14	GT06_20250421_094808	1.7452e+09	78	6	GT06	Indoor air, Durian	Indoor air, Durian, Day 6	Indoor air, Durian, Day 6-7	Ripened	Indoor air, Durian, Ripened
Blue	13.5222	-6.91757	1.84231	117.326	37.72	50.29	GT06_20250421_094808	1.7452e+09	79	6	GT06	Indoor air, Durian	Indoor air, Durian, Day 6	Indoor air, Durian, Day 6-7	Ripened	Indoor air, Durian, Ripened
Blue	14.0111	-10.721	-2.02313	120.364	37.72	50.45	GT06_20250421_094808	1.7452e+09	80	6	GT06	Indoor air, Durian	Indoor air, Durian, Day 6	Indoor air, Durian, Day 6-7	Ripened	Indoor air, Durian, Ripened
Blue	14.5	-14.5245	-4.88857	125.403	37.72	50.61	GT06_20250421_094808	1.7452e+09	81	6	GT06	Indoor air, Durian	Indoor air, Durian, Day 6	Indoor air, Durian, Day 6-7	Ripened	Indoor air, Durian, Ripened
Blue	16.7309	-9.3011	0.302225	132.572	37.66	50.69	GT06_20250421_094808	1.7452e+09	82	6	GT06	Indoor air, Durian	Indoor air, Durian, Day 6	Indoor air, Durian, Day 6-7	Ripened	Indoor air, Durian, Ripened
Blue	17.4434	-10.4405	-1.87209	135.031	37.66	50.78	GT06_20250421_094808	1.7452e+09	83	6	GT06	Indoor air, Durian	Indoor air, Durian, Day 6	Indoor air, Durian, Day 6-7	Ripened	Indoor air, Durian, Ripened
Blue	19.5579	-9.73164	-0.230107	138.11	37.62	50.95	GT06_20250421_094808	1.7452e+09	84	6	GT06	Indoor air, Durian	Indoor air, Durian, Day 6	Indoor air, Durian, Day 6-7	Ripened	Indoor air, Durian, Ripened
Blue	19.6333	-12.8198	-3.32938	141.38	37.64	50.98	GT06_20250421_094808	1.7452e+09	85	6	GT06	Indoor air, Durian	Indoor air, Durian, Day 6	Indoor air, Durian, Day 6-7	Ripened	Indoor air, Durian, Ripened
Blue	20.1108	-13.0596	-3.61237	143.269	37.62	51.09	GT06_20250421_094808	1.7452e+09	86	6	GT06	Indoor air, Durian	Indoor air, Durian, Day 6	Indoor air, Durian, Day 6-7	Ripened	Indoor air, Durian, Ripened
Blue	20.9395	-9.68462	-1.23786	143.819	37.6	51.09	GT06_20250421_094808	1.7452e+09	87	6	GT06	Indoor air, Durian	Indoor air, Durian, Day 6	Indoor air, Durian, Day 6-7	Ripened	Indoor air, Durian, Ripened
Blue	22.503	-1.84215	6.69321	145.752	37.58	50.86	GT06_20250421_094808	1.7452e+09	88	6	GT06	Indoor air, Durian	Indoor air, Durian, Day 6	Indoor air, Durian, Day 6-7	Ripened	Indoor air, Durian, Ripened
Blue	23.1099	2.67444	11.2834	138.894	37.58	50.67	GT06_20250421_094808	1.7452e+09	89	6	GT06	Indoor air, Durian	Indoor air, Durian, Day 6	Indoor air, Durian, Day 6-7	Ripened	Indoor air, Durian, Ripened
Blue	23.1826	9.51478	19.1731	128.776	37.54	50.54	GT06_20250421_094808	1.7452e+09	90	6	GT06	Indoor air, Durian	Indoor air, Durian, Day 6	Indoor air, Durian, Day 6-7	Ripened	Indoor air, Durian, Ripened
Blue	21.6929	11.4154	21.0851	120.231	37.53	50.51	GT06_20250421_094808	1.7452e+09	91	6	GT06	Indoor air, Durian	Indoor air, Durian, Day 6	Indoor air, Durian, Day 6-7	Ripened	Indoor air, Durian, Ripened
Blue	22.33	12.3642	22.0101	120.421	37.51	50.57	GT06_20250421_094808	1.7452e+09	92	6	GT06	Indoor air, Durian	Indoor air, Durian, Day 6	Indoor air, Durian, Day 6-7	Ripened	Indoor air, Durian, Ripened
Blue	21.8713	12.5998	22.2103	120.43	37.49	50.66	GT06_20250421_094808	1.7452e+09	93	6	GT06	Indoor air, Durian	Indoor air, Durian, Day 6	Indoor air, Durian, Day 6-7	Ripened	Indoor air, Durian, Ripened
Blue	21.3922	9.03404	18.5864	120.528	37.49	50.81	GT06_20250421_094808	1.7452e+09	94	6	GT06	Indoor air, Durian	Indoor air, Durian, Day 6	Indoor air, Durian, Day 6-7	Ripened	Indoor air, Durian, Ripened
Blue	21.2636	7.1804	15.6667	122.782	37.48	50.98	GT06_20250421_094808	1.7452e+09	95	6	GT06	Indoor air, Durian	Indoor air, Durian, Day 6	Indoor air, Durian, Day 6-7	Ripened	Indoor air, Durian, Ripened
Blue	22.9957	6.9395	16.363	127.645	37.45	51.14	GT06_20250421_094808	1.7452e+09	96	6	GT06	Indoor air, Durian	Indoor air, Durian, Day 6	Indoor air, Durian, Day 6-7	Ripened	Indoor air, Durian, Ripened
Blue	23.9629	4.799	14.168	134.079	37.44	51.28	GT06_20250421_094808	1.7452e+09	97	6	GT06	Indoor air, Durian	Indoor air, Durian, Day 6	Indoor air, Durian, Day 6-7	Ripened	Indoor air, Durian, Ripened
Blue	25.5681	5.51002	15.8513	137.208	37.42	51.35	GT06_20250421_094808	1.7452e+09	98	6	GT06	Indoor air, Durian	Indoor air, Durian, Day 6	Indoor air, Durian, Day 6-7	Ripened	Indoor air, Durian, Ripened
Blue	26.8858	4.08161	14.3604	139.797	37.4	51.51	GT06_20250421_094808	1.7452e+09	99	6	GT06	Indoor air, Durian	Indoor air, Durian, Day 6	Indoor air, Durian, Day 6-7	Ripened	Indoor air, Durian, Ripened
Blue	28.3313	3.60406	14.8358	142.626	37.38	51.63	GT06_20250421_094808	1.7452e+09	100	6	GT06	Indoor air, Durian	Indoor air, Durian, Day 6	Indoor air, Durian, Day 6-7	Ripened	Indoor air, Durian, Ripened
Blue	18.2492	-13.9834	-8.82231	155.129	37.92	49.64	GT06_20250422_091204	1.74529e+09	71	7	GT06	Indoor air, Durian	Indoor air, Durian, Day 7	Indoor air, Durian, Day 6-7	Ripened	Indoor air, Durian, Ripened
Blue	18.5571	-8.04269	-2.82395	152.581	37.9	49.49	GT06_20250422_091204	1.74529e+09	72	7	GT06	Indoor air, Durian	Indoor air, Durian, Day 7	Indoor air, Durian, Day 6-7	Ripened	Indoor air, Durian, Ripened
Blue	18.8969	-1.86422	3.41599	141.093	37.88	49.33	GT06_20250422_091204	1.74529e+09	73	7	GT06	Indoor air, Durian	Indoor air, Durian, Day 7	Indoor air, Durian, Day 6-7	Ripened	Indoor air, Durian, Ripened
Blue	17.9813	2.41252	7.72322	133.124	37.86	49.25	GT06_20250422_091204	1.74529e+09	74	7	GT06	Indoor air, Durian	Indoor air, Durian, Day 7	Indoor air, Durian, Day 6-7	Ripened	Indoor air, Durian, Ripened
Blue	17.4595	4.07546	8.39365	125.52	37.85	49.23	GT06_20250422_091204	1.74529e+09	75	7	GT06	Indoor air, Durian	Indoor air, Durian, Day 7	Indoor air, Durian, Day 6-7	Ripened	Indoor air, Durian, Ripened
Blue	16.1082	1.4606	5.73616	123.858	37.85	49.34	GT06_20250422_091204	1.74529e+09	76	7	GT06	Indoor air, Durian	Indoor air, Durian, Day 7	Indoor air, Durian, Day 6-7	Ripened	Indoor air, Durian, Ripened
Blue	16.968	1.17056	6.39884	123.963	37.82	49.46	GT06_20250422_091204	1.74529e+09	77	7	GT06	Indoor air, Durian	Indoor air, Durian, Day 7	Indoor air, Durian, Day 6-7	Ripened	Indoor air, Durian, Ripened
Blue	17.7002	0.929657	6.09515	123.826	37.79	49.62	GT06_20250422_091204	1.74529e+09	78	7	GT06	Indoor air, Durian	Indoor air, Durian, Day 7	Indoor air, Durian, Day 6-7	Ripened	Indoor air, Durian, Ripened
Blue	18.7951	-0.25998	4.86651	131.5	37.78	49.72	GT06_20250422_091204	1.74529e+09	79	7	GT06	Indoor air, Durian	Indoor air, Durian, Day 7	Indoor air, Durian, Day 6-7	Ripened	Indoor air, Durian, Ripened
Blue	20.4003	1.45104	5.54988	134.63	37.76	49.79	GT06_20250422_091204	1.74529e+09	80	7	GT06	Indoor air, Durian	Indoor air, Durian, Day 7	Indoor air, Durian, Day 6-7	Ripened	Indoor air, Durian, Ripened
Blue	19.9851	-1.63925	3.40921	136.848	37.76	49.92	GT06_20250422_091204	1.74529e+09	81	7	GT06	Indoor air, Durian	Indoor air, Durian, Day 7	Indoor air, Durian, Day 6-7	Ripened	Indoor air, Durian, Ripened
Blue	20.2398	-1.64032	3.38851	140.823	37.75	49.97	GT06_20250422_091204	1.74529e+09	82	7	GT06	Indoor air, Durian	Indoor air, Durian, Day 7	Indoor air, Durian, Day 6-7	Ripened	Indoor air, Durian, Ripened
Blue	21.7172	-1.88016	4.10553	145.712	37.73	50.08	GT06_20250422_091204	1.74529e+09	83	7	GT06	Indoor air, Durian	Indoor air, Durian, Day 7	Indoor air, Durian, Day 6-7	Ripened	Indoor air, Durian, Ripened
Blue	24.247	1.91904	7.88818	149.572	37.69	50.12	GT06_20250422_091204	1.74529e+09	84	7	GT06	Indoor air, Durian	Indoor air, Durian, Day 7	Indoor air, Durian, Day 6-7	Ripened	Indoor air, Durian, Ripened
Blue	24.0349	-3.30857	2.61459	152.3	37.71	50.24	GT06_20250422_091204	1.74529e+09	85	7	GT06	Indoor air, Durian	Indoor air, Durian, Day 7	Indoor air, Durian, Day 6-7	Ripened	Indoor air, Durian, Ripened
Blue	26.1503	0.303109	5.20999	152.885	37.68	50.28	GT06_20250422_091204	1.74529e+09	86	7	GT06	Indoor air, Durian	Indoor air, Durian, Day 7	Indoor air, Durian, Day 6-7	Ripened	Indoor air, Durian, Ripened
Blue	26.5017	2.91797	7.86748	153.547	37.68	50.17	GT06_20250422_091204	1.74529e+09	87	7	GT06	Indoor air, Durian	Indoor air, Durian, Day 7	Indoor air, Durian, Day 6-7	Ripened	Indoor air, Durian, Ripened
Blue	27.9373	9.80959	14.8322	154.239	37.66	49.98	GT06_20250422_091204	1.74529e+09	88	7	GT06	Indoor air, Durian	Indoor air, Durian, Day 7	Indoor air, Durian, Day 6-7	Ripened	Indoor air, Durian, Ripened
Blue	27.0536	14.324	19.381	142.33	37.64	49.89	GT06_20250422_091204	1.74529e+09	89	7	GT06	Indoor air, Durian	Indoor air, Durian, Day 7	Indoor air, Durian, Day 6-7	Ripened	Indoor air, Durian, Ripened
Blue	24.3411	16.4635	21.5553	131.871	37.64	49.8	GT06_20250422_091204	1.74529e+09	90	7	GT06	Indoor air, Durian	Indoor air, Durian, Day 7	Indoor air, Durian, Day 6-7	Ripened	Indoor air, Durian, Ripened
Blue	24.6801	19.7392	25.8418	126.877	37.61	49.77	GT06_20250422_091204	1.74529e+09	91	7	GT06	Indoor air, Durian	Indoor air, Durian, Day 7	Indoor air, Durian, Day 6-7	Ripened	Indoor air, Durian, Ripened
Blue	25.0306	20.4512	26.5459	122.032	37.6	49.79	GT06_20250422_091204	1.74529e+09	92	7	GT06	Indoor air, Durian	Indoor air, Durian, Day 7	Indoor air, Durian, Day 6-7	Ripened	Indoor air, Durian, Ripened
Blue	24.0182	22.1121	27.175	122.376	37.57	49.87	GT06_20250422_091204	1.74529e+09	93	7	GT06	Indoor air, Durian	Indoor air, Durian, Day 7	Indoor air, Durian, Day 6-7	Ripened	Indoor air, Durian, Ripened
Blue	25.1017	24.486	29.5288	122.901	37.54	49.92	GT06_20250422_091204	1.74529e+09	94	7	GT06	Indoor air, Durian	Indoor air, Durian, Day 7	Indoor air, Durian, Day 6-7	Ripened	Indoor air, Durian, Ripened
Blue	24.5906	20.6826	25.6633	123.939	37.54	50.08	GT06_20250422_091204	1.74529e+09	95	7	GT06	Indoor air, Durian	Indoor air, Durian, Day 7	Indoor air, Durian, Day 6-7	Ripened	Indoor air, Durian, Ripened
Blue	24.1754	17.5923	22.5227	125.158	37.54	50.21	GT06_20250422_091204	1.74529e+09	96	7	GT06	Indoor air, Durian	Indoor air, Durian, Day 7	Indoor air, Durian, Day 6-7	Ripened	Indoor air, Durian, Ripened
Blue	26.0352	18.3023	23.1853	131.262	37.51	50.33	GT06_20250422_091204	1.74529e+09	97	7	GT06	Indoor air, Durian	Indoor air, Durian, Day 7	Indoor air, Durian, Day 6-7	Ripened	Indoor air, Durian, Ripened
Blue	27.3849	17.1116	22.936	136.911	37.49	50.48	GT06_20250422_091204	1.74529e+09	98	7	GT06	Indoor air, Durian	Indoor air, Durian, Day 7	Indoor air, Durian, Day 6-7	Ripened	Indoor air, Durian, Ripened
Blue	29.9262	17.3471	23.1362	144.92	37.47	50.57	GT06_20250422_091204	1.74529e+09	99	7	GT06	Indoor air, Durian	Indoor air, Durian, Day 7	Indoor air, Durian, Day 6-7	Ripened	Indoor air, Durian, Ripened
Blue	29.479	14.0191	20.7539	150.078	37.47	50.71	GT06_20250422_091204	1.74529e+09	100	7	GT06	Indoor air, Durian	Indoor air, Durian, Day 7	Indoor air, Durian, Day 6-7	Ripened	Indoor air, Durian, Ripened
Blue	20.8489	-2.43448	1.62781	134.5	37.82	47.09	GT06_20250423_101232	1.74538e+09	71	8	GT06	Indoor air, Durian	Indoor air, Durian, Day 8	Indoor air, Durian, Day 8-9	Ripened	Indoor air, Durian, Ripened
Blue	20.4345	-3.622	0.44056	134.224	37.83	47.09	GT06_20250423_101232	1.74538e+09	72	8	GT06	Indoor air, Durian	Indoor air, Durian, Day 8	Indoor air, Durian, Day 8-9	Ripened	Indoor air, Durian, Ripened
Blue	20.486	-1.48575	2.55278	134.689	37.8	47.15	GT06_20250423_101232	1.74538e+09	73	8	GT06	Indoor air, Durian	Indoor air, Durian, Day 8	Indoor air, Durian, Day 8-9	Ripened	Indoor air, Durian, Ripened
Blue	20.6768	-1.96224	2.0489	134.543	37.79	47.22	GT06_20250423_101232	1.74538e+09	74	8	GT06	Indoor air, Durian	Indoor air, Durian, Day 8	Indoor air, Durian, Day 8-9	Ripened	Indoor air, Durian, Ripened
Blue	19.8472	-6.24005	-2.27902	138.487	37.8	47.35	GT06_20250423_101232	1.74538e+09	75	8	GT06	Indoor air, Durian	Indoor air, Durian, Day 8	Indoor air, Durian, Day 8-9	Ripened	Indoor air, Durian, Ripened
Blue	21.3246	-5.47989	-1.56201	144.376	37.78	47.46	GT06_20250423_101232	1.74538e+09	76	8	GT06	Indoor air, Durian	Indoor air, Durian, Day 8	Indoor air, Durian, Day 8-9	Ripened	Indoor air, Durian, Ripened
Blue	22.9733	-8.09475	-4.2195	149.715	37.78	47.57	GT06_20250423_101232	1.74538e+09	77	8	GT06	Indoor air, Durian	Indoor air, Durian, Day 8	Indoor air, Durian, Day 8-9	Ripened	Indoor air, Durian, Ripened
Blue	23.7177	-8.99647	-5.15222	154.234	37.78	47.65	GT06_20250423_101232	1.74538e+09	78	8	GT06	Indoor air, Durian	Indoor air, Durian, Day 8	Indoor air, Durian, Day 8-9	Ripened	Indoor air, Durian, Ripened
Blue	25.5457	-8.52423	-3.73113	161.278	37.75	47.78	GT06_20250423_101232	1.74538e+09	79	8	GT06	Indoor air, Durian	Indoor air, Durian, Day 8	Indoor air, Durian, Day 8-9	Ripened	Indoor air, Durian, Ripened
Blue	30.0231	-8.76407	-4.01412	169.167	37.73	47.89	GT06_20250423_101232	1.74538e+09	80	8	GT06	Indoor air, Durian	Indoor air, Durian, Day 8	Indoor air, Durian, Day 8-9	Ripened	Indoor air, Durian, Ripened
Blue	30.7561	-6.10219	-1.36439	169.537	37.71	47.92	GT06_20250423_101232	1.74538e+09	81	8	GT06	Indoor air, Durian	Indoor air, Durian, Day 8	Indoor air, Durian, Day 8-9	Ripened	Indoor air, Durian, Ripened
Blue	32.0959	0.0762806	5.87556	171.049	37.69	47.76	GT06_20250423_101232	1.74538e+09	82	8	GT06	Indoor air, Durian	Indoor air, Durian, Day 8	Indoor air, Durian, Day 8-9	Ripened	Indoor air, Durian, Ripened
Blue	31.9059	2.45555	8.33286	168.701	37.71	47.56	GT06_20250423_101232	1.74538e+09	83	8	GT06	Indoor air, Durian	Indoor air, Durian, Day 8	Indoor air, Durian, Day 8-9	Ripened	Indoor air, Durian, Ripened
Blue	28.0976	3.88184	9.7824	148.061	37.71	47.5	GT06_20250423_101232	1.74538e+09	84	8	GT06	Indoor air, Durian	Indoor air, Durian, Day 8	Indoor air, Durian, Day 8-9	Ripened	Indoor air, Durian, Ripened
Blue	28.1695	9.81941	15.7187	142.437	37.66	47.5	GT06_20250423_101232	1.74538e+09	85	8	GT06	Indoor air, Durian	Indoor air, Durian, Day 8	Indoor air, Durian, Day 8-9	Ripened	Indoor air, Durian, Ripened
Blue	28.3923	9.58063	14.4564	142.352	37.65	47.56	GT06_20250423_101232	1.74538e+09	86	8	GT06	Indoor air, Durian	Indoor air, Durian, Day 8	Indoor air, Durian, Day 8-9	Ripened	Indoor air, Durian, Ripened
Blue	28.5511	8.86643	13.7109	142.146	37.64	47.64	GT06_20250423_101232	1.74538e+09	87	8	GT06	Indoor air, Durian	Indoor air, Durian, Day 8	Indoor air, Durian, Day 8-9	Ripened	Indoor air, Durian, Ripened
Blue	29.3914	7.67785	13.503	145.845	37.64	47.69	GT06_20250423_101232	1.74538e+09	88	8	GT06	Indoor air, Durian	Indoor air, Durian, Day 8	Indoor air, Durian, Day 8-9	Ripened	Indoor air, Durian, Ripened
Blue	30.8254	11.7639	16.5608	146.525	37.6	47.76	GT06_20250423_101232	1.74538e+09	89	8	GT06	Indoor air, Durian	Indoor air, Durian, Day 8	Indoor air, Durian, Day 8-9	Ripened	Indoor air, Durian, Ripened
Blue	31.506	9.38675	14.1449	149.924	37.6	47.86	GT06_20250423_101232	1.74538e+09	90	8	GT06	Indoor air, Durian	Indoor air, Durian, Day 8	Indoor air, Durian, Day 8-9	Ripened	Indoor air, Durian, Ripened
Blue	32.3143	7.96046	13.6954	154.563	37.6	47.92	GT06_20250423_101232	1.74538e+09	91	8	GT06	Indoor air, Durian	Indoor air, Durian, Day 8	Indoor air, Durian, Day 8-9	Ripened	Indoor air, Durian, Ripened
Blue	33.8237	7.95833	13.654	158.512	37.58	48.02	GT06_20250423_101232	1.74538e+09	92	8	GT06	Indoor air, Durian	Indoor air, Durian, Day 8	Indoor air, Durian, Day 8-9	Ripened	Indoor air, Durian, Ripened
Blue	35.8113	10.6192	15.283	162.857	37.55	48.1	GT06_20250423_101232	1.74538e+09	93	8	GT06	Indoor air, Durian	Indoor air, Durian, Day 8	Indoor air, Durian, Day 8-9	Ripened	Indoor air, Durian, Ripened
Blue	34.6632	5.86698	11.4926	165.706	37.57	48.2	GT06_20250423_101232	1.74538e+09	94	8	GT06	Indoor air, Durian	Indoor air, Durian, Day 8	Indoor air, Durian, Day 8-9	Ripened	Indoor air, Durian, Ripened
Blue	36.6188	7.29008	13.8801	168.99	37.54	48.29	GT06_20250423_101232	1.74538e+09	95	8	GT06	Indoor air, Durian	Indoor air, Durian, Day 8	Indoor air, Durian, Day 8-9	Ripened	Indoor air, Durian, Ripened
Blue	40.5745	9.71318	15.2675	174.274	37.51	48.38	GT06_20250423_101232	1.74538e+09	96	8	GT06	Indoor air, Durian	Indoor air, Durian, Day 8	Indoor air, Durian, Day 8-9	Ripened	Indoor air, Durian, Ripened
Blue	40.5107	9.23775	15.7843	174.154	37.51	48.4	GT06_20250423_101232	1.74538e+09	97	8	GT06	Indoor air, Durian	Indoor air, Durian, Day 8	Indoor air, Durian, Day 8-9	Ripened	Indoor air, Durian, Ripened
Blue	42.0732	15.1774	22.762	175.581	37.48	48.3	GT06_20250423_101232	1.74538e+09	98	8	GT06	Indoor air, Durian	Indoor air, Durian, Day 8	Indoor air, Durian, Day 8-9	Ripened	Indoor air, Durian, Ripened
Blue	42.0741	18.0802	24.7154	174.087	37.49	48.17	GT06_20250423_101232	1.74538e+09	99	8	GT06	Indoor air, Durian	Indoor air, Durian, Day 8	Indoor air, Durian, Day 8-9	Ripened	Indoor air, Durian, Ripened
Blue	42.3066	27.1091	33.813	165.27	37.45	47.99	GT06_20250423_101232	1.74538e+09	100	8	GT06	Indoor air, Durian	Indoor air, Durian, Day 8	Indoor air, Durian, Day 8-9	Ripened	Indoor air, Durian, Ripened
Blue	-7.38914	-18.2172	-14.0626	2.58046	40.01	43.48	GT06_20250424_141852	1.74548e+09	71	9	GT06	Indoor air, Durian	Indoor air, Durian, Day 9	Indoor air, Durian, Day 8-9	After ripened	Indoor air, Durian, After ripened
Blue	-6.97475	-17.0297	-12.8754	3.85559	40	43.48	GT06_20250424_141852	1.74548e+09	72	9	GT06	Indoor air, Durian	Indoor air, Durian, Day 9	Indoor air, Durian, Day 8-9	After ripened	Indoor air, Durian, After ripened
Blue	-8.34569	-21.5431	-17.4035	3.78975	40.03	43.52	GT06_20250424_141852	1.74548e+09	73	9	GT06	Indoor air, Durian	Indoor air, Durian, Day 9	Indoor air, Durian, Day 8-9	After ripened	Indoor air, Durian, After ripened
Blue	-7.42108	-18.4549	-14.3042	4.52035	40.01	43.49	GT06_20250424_141852	1.74548e+09	74	9	GT06	Indoor air, Durian	Indoor air, Durian, Day 9	Indoor air, Durian, Day 8-9	After ripened	Indoor air, Durian, After ripened
Blue	-8.34569	-21.5431	-16.4035	3.78975	40.03	43.52	GT06_20250424_141852	1.74548e+09	75	9	GT06	Indoor air, Durian	Indoor air, Durian, Day 9	Indoor air, Durian, Day 8-9	After ripened	Indoor air, Durian, After ripened
Blue	-8.1221	-19.8791	-14.7124	4.21052	40.03	43.45	GT06_20250424_141852	1.74548e+09	76	9	GT06	Indoor air, Durian	Indoor air, Durian, Day 9	Indoor air, Durian, Day 8-9	After ripened	Indoor air, Durian, After ripened
Blue	-8.53649	-21.0666	-15.8996	3.93539	40.04	43.45	GT06_20250424_141852	1.74548e+09	77	9	GT06	Indoor air, Durian	Indoor air, Durian, Day 9	Indoor air, Durian, Day 8-9	After ripened	Indoor air, Durian, After ripened
Blue	-8.05821	-19.4036	-15.2292	3.33074	40.03	43.43	GT06_20250424_141852	1.74548e+09	78	9	GT06	Indoor air, Durian	Indoor air, Durian, Day 9	Indoor air, Durian, Day 8-9	After ripened	Indoor air, Durian, After ripened
Blue	-7.26138	-17.2663	-12.0963	3.8209	40.01	43.44	GT06_20250424_141852	1.74548e+09	79	9	GT06	Indoor air, Durian	Indoor air, Durian, Day 9	Indoor air, Durian, Day 8-9	After ripened	Indoor air, Durian, After ripened
Blue	-8.4726	-20.5912	-15.4165	3.05561	40.04	43.43	GT06_20250424_141852	1.74548e+09	80	9	GT06	Indoor air, Durian	Indoor air, Durian, Day 9	Indoor air, Durian, Day 8-9	After ripened	Indoor air, Durian, After ripened
Blue	-8.18598	-20.3545	-15.1956	3.0903	40.03	43.47	GT06_20250424_141852	1.74548e+09	81	9	GT06	Indoor air, Durian	Indoor air, Durian, Day 9	Indoor air, Durian, Day 8-9	After ripened	Indoor air, Durian, After ripened
Blue	-8.53649	-21.0666	-15.8996	1.93539	40.04	43.45	GT06_20250424_141852	1.74548e+09	82	9	GT06	Indoor air, Durian	Indoor air, Durian, Day 9	Indoor air, Durian, Day 8-9	After ripened	Indoor air, Durian, After ripened
Blue	-8.09016	-19.6414	-14.4708	2.27063	40.03	43.44	GT06_20250424_141852	1.74548e+09	83	9	GT06	Indoor air, Durian	Indoor air, Durian, Day 9	Indoor air, Durian, Day 8-9	After ripened	Indoor air, Durian, After ripened
Blue	-8.05821	-19.4036	-14.2292	2.33074	40.03	43.43	GT06_20250424_141852	1.74548e+09	84	9	GT06	Indoor air, Durian	Indoor air, Durian, Day 9	Indoor air, Durian, Day 8-9	After ripened	Indoor air, Durian, After ripened
Blue	-8.85505	-20.541	-16.3621	1.84059	40.05	43.42	GT06_20250424_141852	1.74548e+09	85	9	GT06	Indoor air, Durian	Indoor air, Durian, Day 9	Indoor air, Durian, Day 8-9	After ripened	Indoor air, Durian, After ripened
Blue	-7.96239	-17.6905	-12.5044	1.51107	40.03	43.4	GT06_20250424_141852	1.74548e+09	86	9	GT06	Indoor air, Durian	Indoor air, Durian, Day 9	Indoor air, Durian, Day 8-9	After ripened	Indoor air, Durian, After ripened
Blue	-8.88699	-20.7787	-15.6037	0.780477	40.05	43.43	GT06_20250424_141852	1.74548e+09	87	9	GT06	Indoor air, Durian	Indoor air, Durian, Day 9	Indoor air, Durian, Day 8-9	After ripened	Indoor air, Durian, After ripened
Blue	-7.96239	-17.6905	-12.5044	1.51107	40.03	43.4	GT06_20250424_141852	1.74548e+09	88	9	GT06	Indoor air, Durian	Indoor air, Durian, Day 9	Indoor air, Durian, Day 8-9	After ripened	Indoor air, Durian, After ripened
Blue	-7.98282	-21.4918	-16.3285	0.600147	40.05	43.46	GT06_20250424_141852	1.74548e+09	89	9	GT06	Indoor air, Durian	Indoor air, Durian, Day 9	Indoor air, Durian, Day 8-9	After ripened	Indoor air, Durian, After ripened
Blue	-7.82311	-20.3032	-15.1205	1.9007	40.05	43.41	GT06_20250424_141852	1.74548e+09	90	9	GT06	Indoor air, Durian	Indoor air, Durian, Day 9	Indoor air, Durian, Day 8-9	After ripened	Indoor air, Durian, After ripened
Blue	-8.61995	-22.4406	-16.2534	2.41054	40.07	43.4	GT06_20250424_141852	1.74548e+09	91	9	GT06	Indoor air, Durian	Indoor air, Durian, Day 9	Indoor air, Durian, Day 8-9	After ripened	Indoor air, Durian, After ripened
Blue	-7.34484	-18.6403	-12.4501	3.29605	40.04	43.39	GT06_20250424_141852	1.74548e+09	92	9	GT06	Indoor air, Durian	Indoor air, Durian, Day 9	Indoor air, Durian, Day 8-9	After ripened	Indoor air, Durian, After ripened
Blue	-6.24902	-17.9272	-11.7253	3.47638	40.04	43.36	GT06_20250424_141852	1.74548e+09	93	9	GT06	Indoor air, Durian	Indoor air, Durian, Day 9	Indoor air, Durian, Day 8-9	After ripened	Indoor air, Durian, After ripened
Blue	-7.85505	-20.541	-14.3621	2.84059	40.05	43.42	GT06_20250424_141852	1.74548e+09	94	9	GT06	Indoor air, Durian	Indoor air, Durian, Day 9	Indoor air, Durian, Day 8-9	After ripened	Indoor air, Durian, After ripened
Blue	-8.52413	-21.7274	-15.5287	2.59087	40.07	43.37	GT06_20250424_141852	1.74548e+09	95	9	GT06	Indoor air, Durian	Indoor air, Durian, Day 9	Indoor air, Durian, Day 8-9	After ripened	Indoor air, Durian, After ripened
Blue	-8.52413	-21.7274	-15.5287	1.59087	40.07	43.37	GT06_20250424_141852	1.74548e+09	96	9	GT06	Indoor air, Durian	Indoor air, Durian, Day 9	Indoor air, Durian, Day 8-9	After ripened	Indoor air, Durian, After ripened
Blue	-8.52413	-21.7274	-15.5287	1.59087	40.07	43.37	GT06_20250424_141852	1.74548e+09	97	9	GT06	Indoor air, Durian	Indoor air, Durian, Day 9	Indoor air, Durian, Day 8-9	After ripened	Indoor air, Durian, After ripened
Blue	-8.97046	-22.1526	-16.9575	1.25563	40.08	43.38	GT06_20250424_141852	1.74548e+09	98	9	GT06	Indoor air, Durian	Indoor air, Durian, Day 9	Indoor air, Durian, Day 8-9	After ripened	Indoor air, Durian, After ripened
Blue	-8.87463	-21.4395	-16.2327	1.43596	40.08	43.35	GT06_20250424_141852	1.74548e+09	99	9	GT06	Indoor air, Durian	Indoor air, Durian, Day 9	Indoor air, Durian, Day 8-9	After ripened	Indoor air, Durian, After ripened
Blue	-10.1817	-25.4775	-20.2777	-0.50966	40.11	43.37	GT06_20250424_141852	1.74548e+09	100	9	GT06	Indoor air, Durian	Indoor air, Durian, Day 9	Indoor air, Durian, Day 8-9	After ripened	Indoor air, Durian, After ripened
Gray	-20.5947	-4.4954	-5.8804	-35.201	37.96	44.45	08gMealybug_20250418_152140	1.74496e+09	71	0	NA	Indoor air	Indoor air	Indoor air	Indoor air	Indoor air
Gray	-19.5112	-3.12144	-4.52659	-33.6762	37.93	44.5	08gMealybug_20250418_152140	1.74496e+09	72	0	NA	Indoor air	Indoor air	Indoor air	Indoor air	Indoor air
Gray	-18.2361	0.678816	-0.723246	-33.7907	37.9	44.49	08gMealybug_20250418_152140	1.74496e+09	73	0	NA	Indoor air	Indoor air	Indoor air	Indoor air	Indoor air
Gray	-19.2246	-3.88479	-4.3057	-34.6415	37.92	44.54	08gMealybug_20250418_152140	1.74496e+09	74	0	NA	Indoor air	Indoor air	Indoor air	Indoor air	Indoor air
Gray	-18.1092	-1.27311	-2.7103	-34.0565	37.89	44.58	08gMealybug_20250418_152140	1.74496e+09	75	0	NA	Indoor air	Indoor air	Indoor air	Indoor air	Indoor air
Gray	-18.7587	-0.561024	-2.00623	-33.9016	37.88	44.6	08gMealybug_20250418_152140	1.74496e+09	76	0	NA	Indoor air	Indoor air	Indoor air	Indoor air	Indoor air
Gray	-18.1535	-0.850003	-1.32286	-33.7721	37.86	44.67	08gMealybug_20250418_152140	1.74496e+09	77	0	NA	Indoor air	Indoor air	Indoor air	Indoor air	Indoor air
Gray	-17.6752	0.81294	-0.652425	-33.3768	37.85	44.65	08gMealybug_20250418_152140	1.74496e+09	78	0	NA	Indoor air	Indoor air	Indoor air	Indoor air	Indoor air
Gray	-15.763	5.56193	4.07589	-32.3016	37.8	44.7	08gMealybug_20250418_152140	1.74496e+09	79	0	NA	Indoor air	Indoor air	Indoor air	Indoor air	Indoor air
Gray	-16.7514	0.998329	0.493432	-33.1525	37.82	44.75	08gMealybug_20250418_152140	1.74496e+09	80	0	NA	Indoor air	Indoor air	Indoor air	Indoor air	Indoor air
Gray	-15.7319	2.89686	2.36406	-32.7478	37.79	44.82	08gMealybug_20250418_152140	1.74496e+09	81	0	NA	Indoor air	Indoor air	Indoor air	Indoor air	Indoor air
Gray	-15.2855	4.32209	3.7929	-32.4126	37.78	44.81	08gMealybug_20250418_152140	1.74496e+09	82	0	NA	Indoor air	Indoor air	Indoor air	Indoor air	Indoor air
Gray	-14.5845	4.74626	4.20105	-33.1028	37.76	44.85	08gMealybug_20250418_152140	1.74496e+09	83	0	NA	Indoor air	Indoor air	Indoor air	Indoor air	Indoor air
Gray	-13.4052	7.83337	6.27962	-32.3976	37.73	44.87	08gMealybug_20250418_152140	1.74496e+09	84	0	NA	Indoor air	Indoor air	Indoor air	Indoor air	Indoor air
Gray	-13.4691	7.35794	4.79644	-31.5178	37.73	44.89	08gMealybug_20250418_152140	1.74496e+09	85	0	NA	Indoor air	Indoor air	Indoor air	Indoor air	Indoor air
Gray	-13.6288	5.16936	3.58849	-31.8184	37.73	44.94	08gMealybug_20250418_152140	1.74496e+09	86	0	NA	Indoor air	Indoor air	Indoor air	Indoor air	Indoor air
Gray	-11.493	11.5824	10.0079	-30.3225	37.68	44.92	08gMealybug_20250418_152140	1.74496e+09	87	0	NA	Indoor air	Indoor air	Indoor air	Indoor air	Indoor air
Gray	-11.7805	8.44292	7.83362	-30.8635	37.68	45.01	08gMealybug_20250418_152140	1.74496e+09	88	0	NA	Indoor air	Indoor air	Indoor air	Indoor air	Indoor air
Gray	-11.9517	10.8179	10.2081	-31.3132	37.66	45.01	08gMealybug_20250418_152140	1.74496e+09	89	0	NA	Indoor air	Indoor air	Indoor air	Indoor air	Indoor air
Gray	-11.6331	10.2923	10.6706	-31.2184	37.65	45.04	08gMealybug_20250418_152140	1.74496e+09	90	0	NA	Indoor air	Indoor air	Indoor air	Indoor air	Indoor air
Gray	-10.5816	12.4286	11.7828	-30.7537	37.62	45.1	08gMealybug_20250418_152140	1.74496e+09	91	0	NA	Indoor air	Indoor air	Indoor air	Indoor air	Indoor air
Gray	-10.3269	12.4275	11.7621	-30.7791	37.61	45.15	08gMealybug_20250418_152140	1.74496e+09	92	0	NA	Indoor air	Indoor air	Indoor air	Indoor air	Indoor air
Gray	-10.8806	12.8527	13.191	-30.4438	37.6	45.14	08gMealybug_20250418_152140	1.74496e+09	93	0	NA	Indoor air	Indoor air	Indoor air	Indoor air	Indoor air
Gray	-9.63741	16.4153	14.7527	-29.6184	37.57	45.14	08gMealybug_20250418_152140	1.74496e+09	94	0	NA	Indoor air	Indoor air	Indoor air	Indoor air	Indoor air
Gray	-9.09611	15.6509	14.9529	-29.6092	37.55	45.23	08gMealybug_20250418_152140	1.74496e+09	95	0	NA	Indoor air	Indoor air	Indoor air	Indoor air	Indoor air
Gray	-9.95683	13.0381	12.3368	-30.2195	37.57	45.24	08gMealybug_20250418_152140	1.74496e+09	96	0	NA	Indoor air	Indoor air	Indoor air	Indoor air	Indoor air
Gray	-7.42703	16.8373	16.1195	-29.3594	37.53	45.28	08gMealybug_20250418_152140	1.74496e+09	97	0	NA	Indoor air	Indoor air	Indoor air	Indoor air	Indoor air
Gray	-6.59825	19.2123	18.494	-28.8092	37.51	45.28	08gMealybug_20250418_152140	1.74496e+09	98	0	NA	Indoor air	Indoor air	Indoor air	Indoor air	Indoor air
Gray	-7.5548	14.8864	14.1531	-29.5999	37.53	45.32	08gMealybug_20250418_152140	1.74496e+09	99	0	NA	Indoor air	Indoor air	Indoor air	Indoor air	Indoor air
Gray	-5.6745	19.3977	18.6398	-28.5849	37.48	45.38	08gMealybug_20250418_152140	1.74496e+09	100	0	NA	Indoor air	Indoor air	Indoor air	Indoor air	Indoor air
Gray	-16.0692	3.42674	2.98437	-32.741	38.24	43.47	08gMealybug_20250418_153141	1.74497e+09	71	0	NA	Indoor air	Indoor air	Indoor air	Indoor air	Indoor air
Gray	-17.133	2.95131	1.50119	-32.8612	38.24	43.49	08gMealybug_20250418_153141	1.74497e+09	72	0	NA	Indoor air	Indoor air	Indoor air	Indoor air	Indoor air
Gray	-17.2928	0.762738	0.293237	-33.1617	38.24	43.54	08gMealybug_20250418_153141	1.74497e+09	73	0	NA	Indoor air	Indoor air	Indoor air	Indoor air	Indoor air
Gray	-15.4125	4.27401	3.77996	-32.1467	38.19	43.6	08gMealybug_20250418_153141	1.74497e+09	74	0	NA	Indoor air	Indoor air	Indoor air	Indoor air	Indoor air
Gray	-15.4763	3.79858	3.29678	-32.267	38.19	43.62	08gMealybug_20250418_153141	1.74497e+09	75	0	NA	Indoor air	Indoor air	Indoor air	Indoor air	Indoor air
Gray	-13.4044	9.73615	9.23304	-30.8913	38.14	43.62	08gMealybug_20250418_153141	1.74497e+09	76	0	NA	Indoor air	Indoor air	Indoor air	Indoor air	Indoor air
Gray	-14.4568	5.69712	4.16741	-31.8623	38.16	43.69	08gMealybug_20250418_153141	1.74497e+09	77	0	NA	Indoor air	Indoor air	Indoor air	Indoor air	Indoor air
Gray	-13.7034	10.1603	9.64119	-30.5815	38.12	43.66	08gMealybug_20250418_153141	1.74497e+09	78	0	NA	Indoor air	Indoor air	Indoor air	Indoor air	Indoor air
Gray	-14.0547	7.54545	6.9837	-31.2427	38.12	43.77	08gMealybug_20250418_153141	1.74497e+09	79	0	NA	Indoor air	Indoor air	Indoor air	Indoor air	Indoor air
Gray	-13.194	10.1582	8.59979	-30.6323	38.1	43.76	08gMealybug_20250418_153141	1.74497e+09	80	0	NA	Indoor air	Indoor air	Indoor air	Indoor air	Indoor air
Gray	-11.4095	12.9563	12.3617	-29.7976	38.05	43.85	08gMealybug_20250418_153141	1.74497e+09	81	0	NA	Indoor air	Indoor air	Indoor air	Indoor air	Indoor air
Gray	-11.6012	11.53	10.9122	-30.1583	38.05	43.91	08gMealybug_20250418_153141	1.74497e+09	82	0	NA	Indoor air	Indoor air	Indoor air	Indoor air	Indoor air
Gray	-10.8363	13.4296	10.8035	-29.7282	38.03	43.93	08gMealybug_20250418_153141	1.74497e+09	83	0	NA	Indoor air	Indoor air	Indoor air	Indoor air	Indoor air
Gray	-10.2941	14.568	12.9571	-29.2127	38.02	43.89	08gMealybug_20250418_153141	1.74497e+09	84	0	NA	Indoor air	Indoor air	Indoor air	Indoor air	Indoor air
Gray	-10.5497	11.6663	11.0244	-29.6935	38.02	43.97	08gMealybug_20250418_153141	1.74497e+09	85	0	NA	Indoor air	Indoor air	Indoor air	Indoor air	Indoor air
Gray	-8.63741	16.4153	15.7527	-28.6184	37.97	44.02	08gMealybug_20250418_153141	1.74497e+09	86	0	NA	Indoor air	Indoor air	Indoor air	Indoor air	Indoor air
Gray	-8.76518	15.4644	14.7864	-28.8589	37.97	44.06	08gMealybug_20250418_153141	1.74497e+09	87	0	NA	Indoor air	Indoor air	Indoor air	Indoor air	Indoor air
Gray	-8.92488	13.2758	12.5784	-29.1594	37.97	44.11	08gMealybug_20250418_153141	1.74497e+09	88	0	NA	Indoor air	Indoor air	Indoor air	Indoor air	Indoor air
Gray	-8.33121	17.5505	16.8442	-28.1791	37.93	44.13	08gMealybug_20250418_153141	1.74497e+09	89	0	NA	Indoor air	Indoor air	Indoor air	Indoor air	Indoor air
Gray	-8.45897	15.5996	15.8779	-28.4196	37.93	44.17	08gMealybug_20250418_153141	1.74497e+09	90	0	NA	Indoor air	Indoor air	Indoor air	Indoor air	Indoor air
Gray	-6.57867	20.1109	20.3646	-27.4046	37.88	44.23	08gMealybug_20250418_153141	1.74497e+09	91	0	NA	Indoor air	Indoor air	Indoor air	Indoor air	Indoor air
Gray	-7.08889	18.2102	18.4526	-27.86	37.89	44.26	08gMealybug_20250418_153141	1.74497e+09	92	0	NA	Indoor air	Indoor air	Indoor air	Indoor air	Indoor air
Gray	-5.87766	21.535	20.7728	-27.0947	37.86	44.27	08gMealybug_20250418_153141	1.74497e+09	93	0	NA	Indoor air	Indoor air	Indoor air	Indoor air	Indoor air
Gray	-4.9539	22.7204	21.9186	-26.8704	37.83	44.37	08gMealybug_20250418_153141	1.74497e+09	94	0	NA	Indoor air	Indoor air	Indoor air	Indoor air	Indoor air
Gray	-4.63534	21.1948	21.3811	-26.7756	37.82	44.4	08gMealybug_20250418_153141	1.74497e+09	95	0	NA	Indoor air	Indoor air	Indoor air	Indoor air	Indoor air
Gray	-4.98584	20.4827	20.677	-26.9305	37.83	44.38	08gMealybug_20250418_153141	1.74497e+09	96	0	NA	Indoor air	Indoor air	Indoor air	Indoor air	Indoor air
Gray	-3.13748	24.7563	24.9222	-25.9756	37.78	44.45	08gMealybug_20250418_153141	1.74497e+09	97	0	NA	Indoor air	Indoor air	Indoor air	Indoor air	Indoor air
Gray	-3.13748	24.7563	23.9222	-25.9756	37.78	44.45	08gMealybug_20250418_153141	1.74497e+09	98	0	NA	Indoor air	Indoor air	Indoor air	Indoor air	Indoor air
Gray	-2.50035	25.705	24.8471	-25.786	37.76	44.51	08gMealybug_20250418_153141	1.74497e+09	99	0	NA	Indoor air	Indoor air	Indoor air	Indoor air	Indoor air
Gray	-1.48077	26.6035	26.7177	-25.3814	37.73	44.58	08gMealybug_20250418_153141	1.74497e+09	100	0	NA	Indoor air	Indoor air	Indoor air	Indoor air	Indoor air
Gray	-4.28955	-5.91896	-4.80267	-1.3838	38.99	41.77	08gMealybug_20250418_154142	1.74497e+09	71	0	NA	Indoor air	Indoor air	Indoor air	Indoor air	Indoor air
Gray	-4.70394	-7.10647	-5.98993	-1.65894	39	41.77	08gMealybug_20250418_154142	1.74497e+09	72	0	NA	Indoor air	Indoor air	Indoor air	Indoor air	Indoor air
Gray	-3.25761	-5.68124	-4.56108	-1.32369	38.99	41.76	08gMealybug_20250418_154142	1.74497e+09	73	0	NA	Indoor air	Indoor air	Indoor air	Indoor air	Indoor air
Gray	-3.60811	-6.39333	-5.26516	-1.4786	39	41.74	08gMealybug_20250418_154142	1.74497e+09	74	0	NA	Indoor air	Indoor air	Indoor air	Indoor air	Indoor air
Gray	-3.51229	-5.68018	-4.54039	-1.29827	39	41.71	08gMealybug_20250418_154142	1.74497e+09	75	0	NA	Indoor air	Indoor air	Indoor air	Indoor air	Indoor air
Gray	-3.64006	-6.63104	-5.50675	-1.53872	39	41.75	08gMealybug_20250418_154142	1.74497e+09	76	0	NA	Indoor air	Indoor air	Indoor air	Indoor air	Indoor air
Gray	-3.25761	-4.68124	-4.56108	-1.32369	38.99	41.76	08gMealybug_20250418_154142	1.74497e+09	77	0	NA	Indoor air	Indoor air	Indoor air	Indoor air	Indoor air
Gray	-3.672	-5.86876	-5.74834	-1.59883	39	41.76	08gMealybug_20250418_154142	1.74497e+09	78	0	NA	Indoor air	Indoor air	Indoor air	Indoor air	Indoor air
Gray	-3.672	-5.86876	-5.74834	-1.59883	39	41.76	08gMealybug_20250418_154142	1.74497e+09	79	0	NA	Indoor air	Indoor air	Indoor air	Indoor air	Indoor air
Gray	-3.0979	-3.49267	-3.35313	-1.02314	38.99	41.71	08gMealybug_20250418_154142	1.74497e+09	80	0	NA	Indoor air	Indoor air	Indoor air	Indoor air	Indoor air
Gray	-3.57617	-5.15561	-5.02357	-1.41849	39	41.73	08gMealybug_20250418_154142	1.74497e+09	81	0	NA	Indoor air	Indoor air	Indoor air	Indoor air	Indoor air
Gray	-3.25761	-4.68124	-4.56108	-1.32369	38.99	41.76	08gMealybug_20250418_154142	1.74497e+09	82	0	NA	Indoor air	Indoor air	Indoor air	Indoor air	Indoor air
Gray	-4.27719	-6.57978	-6.43171	-2.72832	39.02	41.69	08gMealybug_20250418_154142	1.74497e+09	83	0	NA	Indoor air	Indoor air	Indoor air	Indoor air	Indoor air
Gray	-3.54423	-4.9179	-4.78198	-2.35838	39	41.72	08gMealybug_20250418_154142	1.74497e+09	84	0	NA	Indoor air	Indoor air	Indoor air	Indoor air	Indoor air
Gray	-4.7874	-8.48044	-8.34373	-3.18378	39.03	41.72	08gMealybug_20250418_154142	1.74497e+09	85	0	NA	Indoor air	Indoor air	Indoor air	Indoor air	Indoor air
Gray	-3.48035	-4.44247	-4.2988	-1.23816	39	41.7	08gMealybug_20250418_154142	1.74497e+09	86	0	NA	Indoor air	Indoor air	Indoor air	Indoor air	Indoor air
Gray	-3.32064	-3.25389	-3.09085	-0.937614	39	41.65	08gMealybug_20250418_154142	1.74497e+09	87	0	NA	Indoor air	Indoor air	Indoor air	Indoor air	Indoor air
Gray	-5.20179	-9.66795	-9.53099	-2.45892	39.04	41.72	08gMealybug_20250418_154142	1.74497e+09	88	0	NA	Indoor air	Indoor air	Indoor air	Indoor air	Indoor air
Gray	-4.65964	-7.52958	-6.37737	-1.94334	39.03	41.68	08gMealybug_20250418_154142	1.74497e+09	89	0	NA	Indoor air	Indoor air	Indoor air	Indoor air	Indoor air
Gray	-4.24525	-6.34206	-5.19012	-1.66821	39.02	41.68	08gMealybug_20250418_154142	1.74497e+09	90	0	NA	Indoor air	Indoor air	Indoor air	Indoor air	Indoor air
Gray	-4.40495	-7.53064	-6.39807	-1.96876	39.02	41.73	08gMealybug_20250418_154142	1.74497e+09	91	0	NA	Indoor air	Indoor air	Indoor air	Indoor air	Indoor air
Gray	-5.16985	-9.43023	-8.2894	-2.39881	39.04	41.71	08gMealybug_20250418_154142	1.74497e+09	92	0	NA	Indoor air	Indoor air	Indoor air	Indoor air	Indoor air
Gray	-4.65964	-7.52958	-6.37737	-1.94334	39.03	41.68	08gMealybug_20250418_154142	1.74497e+09	93	0	NA	Indoor air	Indoor air	Indoor air	Indoor air	Indoor air
Gray	-4.65964	-7.52958	-6.37737	-1.94334	39.03	41.68	08gMealybug_20250418_154142	1.74497e+09	94	0	NA	Indoor air	Indoor air	Indoor air	Indoor air	Indoor air
Gray	-4.65964	-7.52958	-6.37737	-1.94334	39.03	41.68	08gMealybug_20250418_154142	1.74497e+09	95	0	NA	Indoor air	Indoor air	Indoor air	Indoor air	Indoor air
Gray	-5.9028	-11.0921	-9.93913	-3.76874	39.06	41.68	08gMealybug_20250418_154142	1.74497e+09	96	0	NA	Indoor air	Indoor air	Indoor air	Indoor air	Indoor air
Gray	-4.14942	-5.62892	-4.46535	-2.48788	39.02	41.65	08gMealybug_20250418_154142	1.74497e+09	97	0	NA	Indoor air	Indoor air	Indoor air	Indoor air	Indoor air
Gray	-4.56381	-5.81643	-5.6526	-1.76301	39.03	41.65	08gMealybug_20250418_154142	1.74497e+09	98	0	NA	Indoor air	Indoor air	Indoor air	Indoor air	Indoor air
Gray	-5.83892	-9.61668	-9.45595	-2.64852	39.06	41.66	08gMealybug_20250418_154142	1.74497e+09	99	0	NA	Indoor air	Indoor air	Indoor air	Indoor air	Indoor air
Gray	-4.43605	-4.86557	-4.68624	-1.52257	39.03	41.61	08gMealybug_20250418_154142	1.74497e+09	100	0	NA	Indoor air	Indoor air	Indoor air	Indoor air	Indoor air
